# Supplementary material
Source: PubMed Central journal article supplement (PMC2529460)

**The Synthesis of Highly Substituted Isoxazoles by Electrophilic  
Cyclization. An Efficient Synthesis of Valdecoxib.**

Jesse P. Waldo and Richard C. Larock\*

*Department of Chemistry, Iowa State University, Ames, IA 50011*

**SUPPORTING INFORMATION**

|                                                                                                                                     | <b>Page(s)</b> |
|-------------------------------------------------------------------------------------------------------------------------------------|----------------|
| General.....                                                                                                                        | S2             |
| Pd/Cu catalyzed reaction of acid chlorides with acetylenes.....                                                                     | S2-S4          |
| Preparation of Alkynones by the reaction of aldehydes with<br>lithium acetylides, followed by oxidation with MnO <sub>2</sub> ..... | S4-S5          |
| Preparation of 2-alkyn-1-one <i>O</i> -methyl oximes.....                                                                           | S5-S9          |
| Iodocyclization of 2-alkyn-1-one <i>O</i> -methyl oximes.....                                                                       | S9-S12         |
| 4-(5-Methyl-3-phenyl-4-isoxazolyl)benzenesulfonamide (valdecoxib) (46).....                                                         | S12            |
| Methyl 3,5-diphenylisoxazole-4-carboxylate (47).....                                                                                | S13            |
| <i>N</i> -Phenethyl-5-methyl-3-phenylisoxazole-4-carboxamide (48).....                                                              | S13            |
| 5-Methyl-3-phenyl-4-(phenylethynyl)isoxazole (49).....                                                                              | S14            |
| ( <i>E</i> )-3-(5-Methyl-3-phenylisoxazol-4-yl)-1-morpholinoprop-2-en-1-one (50).....                                               | S14            |
| References.....                                                                                                                     | S15            |
| Copies of <sup>1</sup> H and <sup>13</sup> C NMR.....                                                                               | S16-93         |

**General.** The  $^1\text{H}$  and  $^{13}\text{C}$  NMR spectra were recorded at 300 and 75.5 MHz or 400 and 100 MHz respectively. Thin layer chromatography was performed using commercially prepared 60-mesh silica gel plates, and visualization was effected with short wavelength UV light (254 nm). All melting points are uncorrected. All reagents were used directly as obtained commercially unless otherwise noted. The following starting materials were made according to literature procedures: 1,3-diphenylprop-2-yn-1-one,<sup>1</sup> 1-phenyl-2-butyne-1-one,<sup>2</sup> 4,4-dimethyl-1-phenylpent-1-yn-3-one, *N*-methyl-3-indolecarboxaldehyde,<sup>3</sup> 1-phenylnon-1-yn-3-one,<sup>4</sup> 2,2,6,6-tetramethylhept-4-yn-3-one,<sup>5</sup> 1-(furan-2-yl)-3-phenylprop-2-yn-1-one<sup>6</sup> and 1-(4-chlorophenyl)-3-phenylprop-2-yn-1-one. Compounds **1-4**, **7**, **8**, **21**, **22**, **25-28**, **37** and **38** have been reported in our previous communication.<sup>7</sup>

**General procedure for the preparation of alkynes from acyl chlorides.** To a 25 mL flask were added CuI (0.05 mmol), PdCl<sub>2</sub>(PPh<sub>3</sub>)<sub>2</sub> (0.01 mmol) and triethylamine (5 mL). The flask was flushed with argon and the terminal acetylene (2.5 mmol) was added to the stirred suspension, followed by immediate dropwise addition of benzoyl chloride (3.25 mmol, 1.3 equiv). If the acid chloride is a solid, it was added as a THF solution. The resulting mixture was allowed to stir at room temperature overnight, water (5 mL) was added, and the aqueous layer was extracted with ethyl acetate. The organic layers were combined, dried and concentrated under reduced pressure. The residue was then purified by column chromatography on silica gel to afford the desired alkyne.

**1-Phenylhept-2-yn-1-one.** Purification by flash chromatography (20:1 hexanes/EtOAc) afforded 381 mg (82%) of the product as a yellow oil with spectral properties identical to those previously reported.<sup>8</sup>

**Ethyl 4-(3-oxo-3-phenylprop-1-ynyl)benzoate.** Purification by flash chromatography (20:1 hexanes/EtOAc) afforded 570 mg (86%) of the product as a pale yellow solid: mp 54-56 °C;  $^1\text{H}$  NMR (CDCl<sub>3</sub>, 400 MHz)  $\delta$  1.42 (t,  $J$  = 7.2 Hz, 3H), 4.39-4.44 (q,  $J$  = 7.0 Hz, 2H), 7.54 (t,  $J$  = 7.6 Hz, 2H), 7.66 (t,  $J$  = 7.4 Hz, 1H), 7.74-7.76 (d,  $J$  = 8.4 Hz, 2H), 8.1 (t,  $J$  = 8.2 Hz, 2H), 8.22-8.23 (d,  $J$  = 7.2 Hz, 2H);  $^{13}\text{C}$  NMR  $\delta$  14.5,

61.7, 88.7, 91.5, 124.6, 128.9, 129.8 (2 carbons), 132.3, 133.0, 134.6, 136.8, 165.8, 177.9; HRMS Calcd for C<sub>18</sub>H<sub>14</sub>O<sub>3</sub>: 278.0943. Found: 278.0947.

**3-(4-Methoxyphenyl)-1-phenylprop-2-yn-1-one.** Purification by flash chromatography (10:1 hexanes/EtOAc) afforded 470 mg (84%) of the product as a colorless solid: mp 121-122 °C (lit. 81-85 °C)<sup>9</sup> with spectral properties identical to those previously reported.<sup>10</sup>

**1-Phenyl-3-(thiophen-2-yl)prop-2-yn-1-one.** Purification by flash chromatography (20:1 hexanes/EtOAc) afforded 413 mg (78%) of the product as a yellow oil with spectral properties identical to those previously reported.<sup>11</sup>

**3-Phenyl-1-[4-(trifluoromethyl)phenyl]prop-2-yn-1-one.** Purification by flash chromatography (20:1 hexanes/EtOAc) afforded 413 mg (79%) of the product as a colorless solid: mp 75-77 °C (lit. 70-72 °C) with spectral properties identical to those previously reported.<sup>12</sup>

**3-Phenyl-1-*o*-tolylprop-2-yn-1-one.** Purification by flash chromatography (20:1 hexanes/EtOAc) afforded 440 mg (80%) of the product as a pale yellow liquid with spectral properties identical to those previously reported.<sup>13</sup>

**4,4-Dimethyl-1-phenyl-2-pentyn-1-one.** Purification by flash chromatography (40:1 hexanes/EtOAc) afforded 428 mg (92%) of the product as a pale yellow oil with spectral properties identical to those previously reported.<sup>14</sup>

**1-(3,4,5-Trimethoxyphenyl)but-2-yn-1-one.** A modified procedure was used. To a 25 mL flask were added CuI (0.05 mmol), PdCl<sub>2</sub>(PPh<sub>3</sub>)<sub>2</sub> (0.01 mmol) and triethylamine (5 mL). The flask was flushed with argon and 3,4,5-trimethoxybenzoyl chloride (3.25 mmol) in THF (5 mL) was added to the flask. The flask was flushed with propyne and a balloon of propyne gas was placed on the reaction flask. The resulting suspension was allowed to stir overnight. Purification by flash chromatography (4:1

hexanes/EtOAc) afforded 550 mg (94%) of the product as a pale yellow solid: mp 99-100 °C; <sup>1</sup>H NMR (CDCl<sub>3</sub> 400 MHz) δ 2.17 (s, 3H), 3.94 (s, 9H), 7.41 (s, 2H); <sup>13</sup>C NMR δ 4.6, 56.5, 61.2, 79.1, 92.4, 107.1, 132.2, 143.6, 153.2, 177.2; HRMS Calcd for C<sub>13</sub>H<sub>14</sub>O<sub>4</sub>: 234.0892. Found: 234.0895.

**General procedure for the preparation of alkynones by the reaction of aldehydes with lithium acetylides, followed by oxidation with MnO<sub>2</sub>.** To a three-neck flask was added phenyl acetylene (11.2 mmol, 1.14 g) and anhydrous THF (7 mL). The stirred solution was cooled to 0 °C and flushed with argon. To the stirred solution, *n*-BuLi (2.5 M in hexanes, 4.5 mL, 11.2 mmol) was added dropwise. The resulting mixture was allowed to stir for 30 min at 0 °C. The aldehyde (9.3 mmol) in anhydrous THF (5 mL) was added dropwise and allowed to stir for 1 h at 0 °C. The solution was quenched with a satd aq NH<sub>4</sub>Cl solution and extracted with ether. The organic layers were combined, dried and concentrated under reduced pressure. The residue was dissolved in chloroform (20 mL) and MnO<sub>2</sub> (27.9 mmol, 2.43 g) was added to the solution. The suspension was refluxed for 1 h, the solution was cooled and filtered through a pad of celite, and the filtrate was concentrated. The residue was purified by column chromatography on silica gel to afford the product. When the product was a solid, it was recrystallized from hexanes/EtOAc or hexanes/CH<sub>2</sub>Cl<sub>2</sub> to afford spectroscopically pure product.

**1-(2,6-Dimethoxyphenyl)-3-phenylprop-2-yn-1-one.** The residue was purified by column chromatography on silica gel to afford 2.37 g (96%) of the product as an orange oil: <sup>1</sup>H NMR (CDCl<sub>3</sub> 400 MHz) δ 3.83 (s, 6H), 6.57-6.59 (d, *J* = 8.4 Hz, 2H), 7.30-7.35 (m, 3H), 7.38-7.42 (m, 1H), 7.52-7.55 (td, *J* = 6.8, 1.6 Hz, 2H); <sup>13</sup>C NMR δ 56.1, 90.1, 90.5, 104.3, 119.0, 120.6, 128.6, 130.5, 132.2, 133.0, 158.1, 178.5; HRMS Calcd for C<sub>17</sub>H<sub>14</sub>O<sub>3</sub>: 266.0943. Found 266.0947.

**3-Phenyl-1-(pyridin-3-yl)prop-2-yn-1-one.** The residue was purified by column chromatography on silica gel to afford 1.19 g (62%) of the product as a brown solid: mp 73-75 °C; <sup>1</sup>H NMR (CDCl<sub>3</sub> 400 MHz) δ 7.42-7.54 (m, 4H), 7.69-7.71 (dd, *J* = 8.2, 1.4

Hz, 2H), 8.42-8.45 (m, 1H), 8.84-8.86 (dd,  $J = 4.8, 1.6$  Hz, 1H), 9.45 (t,  $J = 0.8$  Hz, 1H);  $^{13}\text{C}$  NMR  $\delta$  86.4, 94.8, 119.6, 123.7, 128.9, 131.4, 132.3, 133.4, 136.3, 151.5, 154.3, 176.5; HRMS Calcd for  $\text{C}_{14}\text{H}_9\text{NO}$ : 207.0684. Found: 207.0689.

**1-[4(Dimethylamino)phenyl]-3-phenylprop-2-yn-1-one.** The residue was purified by column chromatography on silica gel to afford 2.13 g (92%) of the product as a bright yellow solid: mp 155-156 °C;  $^1\text{H}$  NMR ( $\text{CDCl}_3$  400 MHz)  $\delta$  3.09 (s, 6H), 6.67-6.69 (d,  $J = 9.2$  Hz, 2H), 7.40-7.45 (m, 3H), 7.65-7.67 (m, 2H), 8.10-8.12 (dd,  $J = 7.2, 2.0$  Hz, 2H);  $^{13}\text{C}$  NMR  $\delta$  40.3, 87.6, 91.3, 110.8, 121.0, 125.7, 128.7, 130.3, 132.2, 133.0, 154.3, 176.2; HRMS Calcd for  $\text{C}_{17}\text{H}_{15}\text{NO}$ : 249.1154. Found: 249.1160.

**1-(Benzo[*d*][1,3]dioxol-5-yl)-3-phenylprop-2-yn-1-one.** The residue was purified by flash chromatography on silica gel (1:1 hexanes: $\text{CHCl}_3$ ) to afford 1.72 g (74%) of the product as a yellow oil with spectral properties identical to those previously reported.<sup>15</sup>

**General procedure for preparation of the *O*-methyl oximes.** The alkyne (3.5 mmol), methoxylamine hydrochloride (7.0 mmol, 579 mg),  $\text{Na}_2\text{SO}_4$  (7.0 mmol, 994 mg) and pyridine (1 mL) in methanol (10 mL) were stirred at room temperature. The addition of the co-solvent benzene was used in cases where the ynone showed poor solubility in methanol. In some cases the reaction required refluxing conditions to go to completion. The reaction was monitored by TLC until the reaction was complete. The mixture was diluted with water (25 mL) and extracted with EtOAc (3 x 5 mL). The organic layer was washed with brine, dried and evaporated. The residue was then purified by column chromatography on silica gel, unless otherwise stated, to afford the desired *O*-methyl oxime.

**(*Z*)-1-Phenylhept-2-yn-1-one *O*-methyl oxime (5).** Purification by flash chromatography (40:1 hexanes/EtOAc) afforded 617 mg (82%) of the product as a pale yellow oil:  $^1\text{H}$  NMR ( $\text{CDCl}_3$  300 MHz)  $\delta$  0.93-0.98 (t,  $J = 7.3$  Hz, 3H), 1.46-1.56 (m, 2H), 1.63-1.68 (m, 2H), 2.52-2.57 (t,  $J = 8.2$  Hz, 2H), 4.08 (s, 3H), 7.35-7.37 (m, 3H),

7.82-7.85 (m, 2H);  $^{13}\text{C}$  NMR ( $\text{CDCl}_3$ )  $\delta$  13.8, 19.7, 22.3, 30.6, 71.7, 104.2, 126.7, 128.5, 129.7, 134.1, 140.5; HRMS Calcd for  $\text{C}_{14}\text{H}_{17}\text{NO}$ : 215.1310. Found: 215.1314.

**(Z)-Ethyl 4-(3-oxo-3-phenylprop-1-ynyl)benzoate O-methyl oxime (9).**

Purification by flash chromatography (40:1 hexanes/EtOAc) afforded 904 mg (82%) of the product as a colorless oil:  $^1\text{H}$  NMR ( $\text{CDCl}_3$  300 MHz)  $\delta$  1.15 (s, 2H), 4.07 (s, 3H), 7.34-7.37 (m, 3H), 7.84-7.88 (m, 2H);  $^{13}\text{C}$  NMR ( $\text{CDCl}_3$ )  $\delta$  11.4, 18.9, 63.2, 96.1, 105.6, 126.6, 128.6, 129.7, 133.8, 140.1; HRMS Calcd for  $\text{C}_{19}\text{H}_{17}\text{NO}_3$ : 307.1208. Found: 307.1212.

**(Z)-3-(4-Methoxyphenyl)-1-phenylprop-2-yn-1-one O-methyl oxime (11).**

Purification by flash chromatography (20:1 hexanes/EtOAc) afforded 677 mg (73%) of the product as a pale yellow oil:  $^1\text{H}$  NMR ( $\text{CDCl}_3$  300 MHz)  $\delta$  3.83 (s, 3H), 4.13 (s, 3H), 6.88-6.91 (d,  $J = 8.9$  Hz, 2H), 7.38-7.40 (m, 3H), 7.54-7.57 (d,  $J = 8.9$  Hz, 2H) 7.90-7.93 (m, 2H);  $^{13}\text{C}$  NMR ( $\text{CDCl}_3$ )  $\delta$  55.6, 63.3, 78.8, 101.9, 114.0, 114.3, 126.7, 128.6, 129.8, 134.0, 134.1, 140.4, 160.9; HRMS Calcd for  $\text{C}_{17}\text{H}_{15}\text{NO}_2$ : 265.1103. Found: 265.1107.

**(Z)-1-Phenyl-3-(thiophen-2-yl)prop-2-yn-1-one O-methyl oxime (13).**

Purification by flash chromatography (20:1 hexanes/EtOAc) afforded 523 mg (62%) of the product as a pale yellow oil:  $^1\text{H}$  NMR ( $\text{CDCl}_3$  400 MHz)  $\delta$  4.13 (s, 3H), 7.02-7.05 (m, 1H), 7.38-7.41 (m, 5H), 7.86-7.90 (m, 2H);  $^{13}\text{C}$  NMR ( $\text{CDCl}_3$ )  $\delta$  63.4, 83.7, 94.7, 121.7, 126.7, 127.6, 128.7, 129.6, 130.0, 133.6, 134.3, 140.0; HRMS Calcd for  $\text{C}_{14}\text{H}_{11}\text{NOS}$ : 241.0561. Found: 241.0566.

**(Z)-1-(4-Chlorophenyl)-3-phenylprop-2-yn-1-one O-methyl oxime (15).**

Purification by flash chromatography (6:1 hexanes/ $\text{CHCl}_3$ ) afforded 621 mg (69%) of the product as a colorless solid: mp 52-54  $^\circ\text{C}$ :  $^1\text{H}$  NMR ( $\text{CDCl}_3$  400 MHz)  $\delta$  4.13 (s, 3H), 7.34-7.41 (m, 5H), 7.59-7.62 (m, 2H), 7.83-7.86 (dt,  $J = 8.8, 2.0$  Hz, 2H);  $^{13}\text{C}$  NMR ( $\text{CDCl}_3$ )  $\delta$  63.4, 79.2, 101.7, 121.7, 127.9, 128.7, 128.8, 129.9, 132.2, 132.3, 135.8, 139; HRMS Calcd for  $\text{C}_{16}\text{H}_{12}\text{ClNO}$ : 269.0607. Found: 269.0611.

**(Z)-3-Phenyl-1-[4-(trifluoromethyl)phenyl]prop-2-yn-1-one O-methyl oxime (17).** Purification by flash chromatography (3:1 hexanes/ CHCl<sub>3</sub>) afforded 530 mg (50%) of the product as a tan solid: mp 41-43 °C; <sup>1</sup>H NMR (CDCl<sub>3</sub> 400 MHz) δ 4.17 (s, 3H), 7.36-7.43 (m, 3H), 7.61-7.66 (m, 4H), 8.02-8.04 (dd, *J* = 8.0, 0.4 Hz, 2H); <sup>13</sup>C NMR (CDCl<sub>3</sub>) δ 63.69, 79.10, 102.20, 121.65, 125.53, 125.57, 125.61, 125.65, 125.95, 126.95, 126.96, 126.99, 128.75, 128.76, 128.77, 130.03, 132.39, 132.41, 132.42, 132.43, 137.15, 138.92 (extra peaks due to C-F coupling); HRMS Calcd for C<sub>17</sub>H<sub>12</sub>F<sub>3</sub>NO: 303.0871. Found: 303.0875.

**(Z)-1-[4(Dimethylamino)phenyl]-3-phenylprop-2-yn-1-one O-methyl oxime (19).** Purification by flash chromatography (CHCl<sub>3</sub>) afforded 710 mg (73%) of the product as a yellow solid: mp 81-83 °C; <sup>1</sup>H NMR (CDCl<sub>3</sub> 400 MHz) δ 2.99 (s, 6H), 4.10 (s, 3H), 6.69-6.71 (m, 2H), 7.35-7.39 (m, 3H), 7.60-7.62 (m, 2H), 7.76-7.80 (m, 2H); <sup>13</sup>C NMR (CDCl<sub>3</sub>) δ 40.6, 63.0, 80.2, 100.5, 111.9, 122.3, 127.8, 128.6, 129.5, 132.4, 140.3, 151.6; HRMS Calcd for C<sub>18</sub>H<sub>18</sub>N<sub>2</sub>O: 278.1419. Found: 278.1424.

**(Z)-4-Phenylbut-3-yn-2-one O-methyl oxime (23).** Purification by flash chromatography on basic alumina (hexanes) afforded 291 mg (48%) of the product as a colorless liquid: <sup>1</sup>H NMR (CDCl<sub>3</sub> 300 MHz) δ 2.13 (s, 3H), 3.97 (s, 3H), 7.34-7.36 (m, 3H), 7.51-7.54 (m, 2H); <sup>13</sup>C NMR (CDCl<sub>3</sub>) δ 20.8, 62.5, 81.2, 99.3, 121.9, 128.6, 129.6, 132.3, 137.8; HRMS Calcd for C<sub>11</sub>H<sub>11</sub>NO: 173.0841. Found: 173.0845.

**(Z)-3-Phenyl-1-*o*-tolylprop-2-yn-1-one O-methyl oxime (29).** Purification by flash chromatography (20:1 hexanes/EtOAc) afforded 488 mg (56%) of the product as a yellow oil: <sup>1</sup>H NMR (CDCl<sub>3</sub> 400 MHz) δ 2.54 (s, 3H), 4.12 (s, 3H), 7.22-7.35 (m, 6H), 7.52-7.55 (m, 3H); <sup>13</sup>C NMR (CDCl<sub>3</sub>) δ 21.1, 63.3, 80.9, 101.5, 122.0, 126.2, 128.7, 129.4, 129.7, 129.8, 131.3, 132.3, 133.6, 137.1, 141.1; HRMS Calcd for C<sub>17</sub>H<sub>15</sub>NO: 249.1154. Found: 249.1158.

**(Z)-1-(2,6-Dimethoxyphenyl)-3-phenylprop-2-yn-1-one O-methyl oxime (31).**

Purification by flash chromatography (CHCl<sub>3</sub>) afforded 630 mg (61%) of the product as a yellow solid: mp 144-146 °C: <sup>1</sup>H NMR (CDCl<sub>3</sub> 400 MHz) δ 3.83 (s, 6H), 4.11 (s, 3H), 6.58-6.60 (d, *J* = 8.4 Hz, 2H), 7.27-7.33 (m, 4H), 7.49-7.51 (m, 2H); <sup>13</sup>C NMR (CDCl<sub>3</sub>) δ 56.4, 63.1, 81.4, 98.6, 104.4, 112.2, 122.4, 128.5, 129.3, 131.0, 132.4, 135.0, 159.0; HRMS Calcd for C<sub>18</sub>H<sub>17</sub>NO<sub>3</sub>: 295.1208. Found: 295.1212.

**(Z)-1-(Benzo[d][1,3]dioxol-5-yl)-3-phenylprop-2-yn-1-one O-methyl oxime**

**(33).** Purification by flash chromatography (1:1 hexanes/CHCl<sub>3</sub>) afforded 322 mg (53%) of the product as a pale yellow oil: <sup>1</sup>H NMR (CDCl<sub>3</sub> 400 MHz) δ 4.11 (s, 3H), 5.99 (s, 2H), 6.82-6.84 (d, *J* = 8.0, 0.8 Hz, 1H), 7.36-7.45 (m, 5H), 7.59-7.61 (m, 2H); <sup>13</sup>C NMR (CDCl<sub>3</sub>) δ 63.1, 79.6, 101.1, 101.7, 106.4, 108.3, 121.8, 121.9, 128.1, 128.8, 132.4, 139.6, 148.1, 149.3; HRMS Calcd for C<sub>17</sub>H<sub>13</sub>INO<sub>3</sub>: 279.0895. Found: 279.0900.

**(Z)-1-(Furan-2-yl)-3-phenylprop-2-yn-1-one O-methyl oxime (35).**

Purification by flash chromatography (20:1 hexanes/EtOAc) afforded 575 mg (73%) of the product as a pale yellow oil: <sup>1</sup>H NMR (CDCl<sub>3</sub> 400 MHz) δ 4.14 (s, 3H), 6.47-6.48 (m, 1H), 6.82-6.83 (d, *J* = 3.8 Hz, 1H), 7.34-7.40 (m, 3H), 7.49 (t, *J* = 0.8 Hz, 1H), 7.58-7.6 (m, 2H); <sup>13</sup>C NMR (CDCl<sub>3</sub>) δ 63.6, 78.2, 99.6, 111.8, 112.7, 121.6, 128.7, 130.0, 132.2, 132.4, 144.4, 148.3; HRMS Calcd for C<sub>14</sub>H<sub>11</sub>NO<sub>2</sub>: 225.0789. Found: 225.0793.

**(Z)-3-Phenyl-1-(pyridin-3-yl)prop-2-yn-1-one O-methyl oxime (39)**

Purification by flash chromatography (2:1 hexanes/EtOAc) afforded 471 mg (57%) of the product as an orange oil: <sup>1</sup>H NMR (CDCl<sub>3</sub> 300 MHz) δ 4.16 (s, 3H), 7.29-7.40 (m, 4H), 7.60-7.63 (m, 2H) 8.16-8.20 (m, 1H), 8.62-8.64 (dd, *J* = 4.8, 1.6 Hz, 1H), 9.14-9.15 (dd, *J* = 2.3, 0.9 Hz, 1H); <sup>13</sup>C NMR (CDCl<sub>3</sub>) δ 63.6, 78.7, 102.3, 121.6, 123.4, 128.7, 129.7, 130.1, 132.4, 133.6, 137.7, 148.3, 150.7; HRMS Calcd for C<sub>15</sub>H<sub>12</sub>N<sub>2</sub>O: 236.0950. Found: 236.0953.

**(Z)-2,2,6,6-Tetramethylhept-4-yn-3-one O-methyl oxime (41).**

Purification by flash chromatography (40:1 hexanes/EtOAc) afforded 566 mg (83%) of the product as a



pale yellow oil:  $^1\text{H}$  NMR ( $\text{CDCl}_3$  400 MHz)  $\delta$  1.17 (s, 9H), 1.31 (s, 9H), 3.90 (s, 3H);  $^{13}\text{C}$  NMR ( $\text{CDCl}_3$ )  $\delta$  28.35, 28.36, 30.9, 37.1, 62.3, 69.9, 110.9, 149.7; HRMS Calcd for  $\text{C}_{12}\text{H}_{21}\text{NO}$ : 195.1623. Found: 195.1626.

**(Z)-1-(3,4,5-Trimethoxyphenyl)but-2-yn-1-one O-methyl oxime (43).**

Purification by flash chromatography (4:1 hexanes/EtOAc) afforded 838 mg (91%) of the product as a pale yellow solid: mp 99-100 °C;  $^1\text{H}$  NMR ( $\text{CDCl}_3$  400 MHz)  $\delta$  2.21 (s, 3H), 3.87 (s, 3H), 3.91 (s, 6H), 4.09 (s, 3H), 7.09 (s, 2H);  $^{13}\text{C}$  NMR ( $\text{CDCl}_3$ )  $\delta$  5.1, 56.3, 61.0, 63.1, 70.8, 99.5, 103.9, 129.4, 139.6, 140.0, 153.1; HRMS Calcd for  $\text{C}_{14}\text{H}_{17}\text{NO}_4$ : 263.1158. Found: 263.1162.

**General procedure for iodocyclization using ICl.** To a stirred solution of the appropriate *O*-methyl oxime (0.25 mmol) in  $\text{CH}_2\text{Cl}_2$  (2.5 mL) was added ICl (1M in  $\text{CH}_2\text{Cl}_2$ , 1.2 equiv) dropwise and the solution was allowed to stir at room temperature. The reaction was monitored by TLC to establish completion. The excess ICl was removed by washing with a satd aq soln of  $\text{Na}_2\text{S}_2\text{O}_3$ . The aqueous solution was then extracted with  $\text{CH}_2\text{Cl}_2$  (3 x 5 mL). The combined organic layers were dried over anhydrous  $\text{MgSO}_4$  and concentrated under a vacuum to yield the crude product, which was purified by flash chromatography on silica gel using hexanes/EtOAc or hexanes/ $\text{CHCl}_3$  as the eluent.

**5-Butyl-4-iodo-3-phenylisoxazole (6).** The product was obtained as a pale yellow oil;  $^1\text{H}$  NMR ( $\text{CDCl}_3$  300 MHz)  $\delta$  0.97 (t,  $J = 7.3$  Hz, 3H), 1.37-1.49 (m, 2H), 1.72-1.80 (m, 2H), 2.88 (t,  $J = 7.6$  Hz, 2H), 7.47-7.49 (m, 3H), 7.76-7.78 (m, 2H);  $^{13}\text{C}$  NMR ( $\text{CDCl}_3$ )  $\delta$  13.9, 22.4, 27.1, 29.5, 57.5, 128.7 (2 carbons), 129.0, 130.1, 162.9, 175.0; HRMS Calcd for  $\text{C}_{13}\text{H}_{14}\text{INO}$ : 327.0120. Found: 327.0126.

**Ethyl 4-(4-iodo-3-phenylisoxazol-5-yl)benzoate (10).** The product was obtained as a colorless solid: mp 151-153 °C;  $^1\text{H}$  NMR ( $\text{CDCl}_3$  300 MHz)  $\delta$  1.43 (t,  $J = 7.2$  Hz, 3H), 4.39-4.46 (q,  $J = 7.1$  Hz, 2H), 7.51-7.54 (m, 3H) 7.76-7.80 (m, 2H), 8.16-8.22 (m,

4H);  $^{13}\text{C}$  NMR ( $\text{CDCl}_3$ )  $\delta$  14.6, 57.8, 61.6, 127.8, 128.7, 128.8, 129.2, 130.1, 130.4, 131.2, 132.4, 165.2, 166.0, 168.0; HRMS Calcd for  $\text{C}_{18}\text{H}_{14}\text{INO}_3$ : 419.0019. Found: 419.0026.

**4-Iodo-5-(4-methoxyphenyl)-3-phenylisoxazole (12).** The product was obtained as a colorless solid: mp 153-155 °C;  $^1\text{H}$  NMR ( $\text{CDCl}_3$  300 MHz)  $\delta$  3.88 (s, 3H), 7.02-7.05 (m, 2H), 7.47-7.52 (m, 3H), 7.76-7.80 (m, 2H), 8.03-8.06 (dd,  $J = 9.1, 0.8$  Hz, 2H);  $^{13}\text{C}$  NMR ( $\text{CDCl}_3$ )  $\delta$  54.9, 55.7, 114.4, 120.0, 128.7, 129.1, 129.2, 129.6, 130.2, 161.6, 164.9, 169.1; HRMS Calcd for  $\text{C}_{16}\text{H}_{12}\text{INO}_2$ : 376.9913. Found: 376.9918.

**4-Iodo-3-phenyl-5-(thiophen-2-yl)isoxazole (14).** The product was obtained as a yellow solid: mp 118-120 °C;  $^1\text{H}$  NMR ( $\text{CDCl}_3$  300 MHz)  $\delta$  7.20-7.23 (dt,  $J = 3.8, 1.2$  Hz, 1H), 7.49-7.54 (m, 3H), 7.56-7.81 (dd,  $J = 6.8, 1.2$  Hz, 1H), 7.76-7.81 (m, 2H), 7.98-8.00 (dd,  $J = 3.8, 1.2$  Hz, 1H);  $^{13}\text{C}$  NMR ( $\text{CDCl}_3$ )  $\delta$  54.9, 55.7, 114.4, 120.0, 128.7, 129.1, 129.2, 129.6, 130.2, 161.6, 164.9, 169.1; HRMS Calcd for  $\text{C}_{13}\text{H}_8\text{INOS}$ : 352.9371. Found: 352.9376.

**3-(4-Chlorophenyl)-4-iodo-5-phenylisoxazole (16).** The product was obtained as a colorless solid: mp 165-167 °C;  $^1\text{H}$  NMR ( $\text{CDCl}_3$  400 MHz)  $\delta$  7.48-7.53 (m, 5H), 7.72-7.76 (td,  $J = 8.8, 2.2$  Hz, 2H), 8.04-8.07 (m, 2H);  $^{13}\text{C}$  NMR ( $\text{CDCl}_3$ )  $\delta$  56.0, 127.3, 127.4, 128.0, 129.0, 129.1, 130.5, 131.1, 136.6, 164.0; HRMS Calcd for  $\text{C}_{15}\text{H}_9\text{ClINO}$ : 380.9417. Found: 380.9425.

**4-Iodo-5-phenyl-3-[4-(trifluoromethyl)phenyl]isoxazole (18).** The product was obtained as a pale yellow solid: mp 174-175 °C;  $^1\text{H}$  NMR ( $\text{CDCl}_3$  400 MHz)  $\delta$  7.52-7.55 (m, 3H), 7.77-7.79 (d,  $J = 8.0$  Hz, 2H), 7.92-7.94 (d,  $J = 8.4$  Hz, 2H), 8.06-8.08 (m, 2H);  $^{13}\text{C}$  NMR ( $\text{CDCl}_3$ )  $\delta$  55.72, 125.74, 125.78, 125.81, 125.85, 127.18, 128.01, 128.02, 128.03, 129.05, 129.06, 129.65, 129.67, 131.19, 163.87, 169.73 (extra peaks due to C-F coupling); HRMS Calcd for  $\text{C}_{16}\text{H}_9\text{F}_3\text{INO}$ : 416.9681. Found: 414.9686.

**4-Iodo-3-[4(dimethylamino)phenyl]-5-phenylisoxazole (20).** The product was obtained as a pale yellow solid: mp 148-149 °C; <sup>1</sup>H NMR (CDCl<sub>3</sub> 400 MHz) δ 3.04 (s, 6H), 6.80-6.82 (d, *J* = 8.8 Hz, 2H), 7.49-7.53 (m, 3H), 7.72-7.74 (td, *J* = 7.0, 2.1 Hz, 2H), 8.05-8.07 (m, 2H); <sup>13</sup>C NMR (CDCl<sub>3</sub>) δ 40.5, 56.6, 111.9, 127.7, 128.0, 128.8, 128.9, 130.0, 130.7, 151.5, 164.6, 168.7; HRMS for C<sub>17</sub>H<sub>15</sub>IN<sub>2</sub>O: 390.0229. Found: 390.0234.

**4-Iodo-3-methyl-5-phenylisoxazole (24).** The product was isolated as a pale yellow oily solid: mp 31-34 °C; <sup>1</sup>H NMR (CDCl<sub>3</sub> 300 MHz) δ 2.35 (s, 3H), 7.48-7.50 (m, 3H), 8.01-8.05 (m, 2H); <sup>13</sup>C NMR (CDCl<sub>3</sub>) δ 12.8, 58.0, 127.4, 127.5, 128.9, 130.7, 163.2, 167.5; HRMS for C<sub>10</sub>H<sub>8</sub>INO: 284.9651. Found: 284.9654.

**4-Iodo-5-phenyl-3-*o*-tolylisoxazole (30).** The product was obtained as a pale yellow solid: mp 84-86 °C; <sup>1</sup>H NMR (CDCl<sub>3</sub> 400 MHz) δ 2.31 (s, 3H), 7.28-7.34 (m, 4H), 7.38-7.41 (m, 1H), 7.50-7.54 (m, 3H), 8.12-8.13 (m, 2H); <sup>13</sup>C NMR (CDCl<sub>3</sub>) δ 20.3, 58.8, 126.0, 127.4, 127.7, 128.7, 129.0, 130.2, 130.4, 130.7, 131.0, 137.7, 166.9, 168.2; HRMS Calcd for C<sub>16</sub>H<sub>12</sub>INO: 360.9964. Found: 360.9968.

**3-(2,6-Dimethoxyphenyl)-4-iodo-5-phenylisoxazole (32).** The product was obtained as a yellow solid: mp 141-143 °C; <sup>1</sup>H NMR (CDCl<sub>3</sub> 400 MHz) δ 3.78 (s, 6H), 6.65-6.67 (d, *J* = 8.4 Hz, 2H), 7.42 (t, *J* = 8.4 Hz, 1H), 7.47-7.52 (m, 2H), 8.12-8.15 (m, 2H); <sup>13</sup>C NMR (CDCl<sub>3</sub>) δ 56.3, 60.7, 104.7, 106.7, 127.6, 127.8, 128.9, 130.6, 132.1, 159.1, 162.6, 167.5; HRMS Calcd for C<sub>17</sub>H<sub>14</sub>INO<sub>3</sub>: 407.0019. Found: 407.0026.

**3-(Benzo[*d*][1,3]dioxol-5-yl)-4-iodo-5-phenylisoxazole (34).** The product was obtained as a colorless solid: mp 126-128 °C; <sup>1</sup>H NMR (CDCl<sub>3</sub> 400 MHz) δ 6.05 (s, 2H), 6.93-6.95 (dd *J* = 8.0, 0.4 Hz, 1H), 7.25-7.26 (m, 1H), 7.30-7.33 (dd, *J* = 8.2, 1.8 Hz, 1H), 7.51-7.54 (m, 3H), 8.04-8.06 (m, 2H); <sup>13</sup>C NMR (CDCl<sub>3</sub>) δ 56.4, 101.8, 108.7, 109.5, 122.5, 123.6, 127.5, 128.0, 129.0, 130.9, 148.0, 149.4, 164.5, 169.2; HRMS Calcd for C<sub>16</sub>H<sub>10</sub>INO<sub>3</sub>: 390.9705. Found: 390.9712.

**3-(Furan-2-yl)-4-iodo-5-phenylisoxazole (36).** The product was obtained as an orange solid: mp 50-53 °C; <sup>1</sup>H NMR (CDCl<sub>3</sub> 400 MHz) δ 6.37-6.38 (d, *J* = 3.6 Hz, 1H), 7.34-7.35 (d, *J* = 3.6 Hz, 1H), 7.52-7.54 (m, 4H), 8.02-8.05 (m, 2H); <sup>13</sup>C NMR (CDCl<sub>3</sub>) δ 52.3, 108.4, 114.9, 126.9, 128.1, 129.0, 131.2, 139.5, 142.9, 155.7, 169.6; HRMS Calcd for C<sub>13</sub>H<sub>8</sub>INO<sub>2</sub>: 336.9600. Found: 3363.9606.

**3-(4-Iodo-5-phenylisoxazol-3-yl)pyridine (40).** The product was obtained as a pale yellow solid: mp 144-146 °C; <sup>1</sup>H NMR (CDCl<sub>3</sub> 300 MHz) δ 7.44-7.49 (m, 1H), 7.54-7.56 (m, 3H), 8.06-8.15 (m, 3H), 8.76-8.77 (dd, *J* = 4.9, 1.6 Hz, 1H), 9.07 (d, *J* = 1.5 Hz, 1H); <sup>13</sup>C NMR (CDCl<sub>3</sub>) δ 55.8, 123.5, 125.3, 127.1, 128.0, 129.1, 131.2, 136.6, 149.8, 151.3, 162.7, 169.7; HRMS Calcd for C<sub>14</sub>H<sub>9</sub>IN<sub>2</sub>O: 347.9760. Found: 347.9765.

**3,5-Di-*tert*-butyl-4-iodoisoxazole (42).** The product was obtained as a colorless solid: mp 106-108 °C; <sup>1</sup>H NMR (CDCl<sub>3</sub> 400 MHz) δ 1.47 (s, 9H), 1.49 (s, 9H); <sup>13</sup>C NMR (CDCl<sub>3</sub>) δ 28.4, 28.5, 33.8, 34.6, 50.6, 169.4, 177.6; HRMS Calcd for C<sub>11</sub>H<sub>18</sub>INO: 307.0433. Found: 307.0437.

**4-Iodo-5-methyl-3-(3,4,5-trimethoxyphenyl)isoxazole (44).** The product was obtained as a colorless solid: mp 148-150 °C; <sup>1</sup>H NMR (CDCl<sub>3</sub> 400 MHz) δ 2.56 (s, 3H), 3.91 (s, 3H), 3.93 (s, 6H), 7.06 (s, 2H); <sup>13</sup>C NMR (CDCl<sub>3</sub>) δ 13.2, 56.4, 57.9, 61.1, 105.8, 124.0, 139.6, 153.4, 162.4, 171.7; HRMS Calcd for C<sub>13</sub>H<sub>14</sub>INO<sub>4</sub>: 374.9968. Found: 374.9971.

**Procedure for the Suzuki-Miyaura cross-coupling to form 4-(5-methyl-3-phenyl-4-isoxazolyl)benzenesulfonamide (valdecoxib) (46).** To a 4-dram vial was added 4-iodo-5-methyl-3-phenylisoxazole (0.25 mmol, 71 mg), benzenesulfonamide-4-boronic acid pinacol ester (0.35 mmol, 99 mg), KHCO<sub>3</sub> (0.35 mmol, 35 mg) and PdCl<sub>2</sub> (0.0125 mmol, 2.2 mg) in 4:1 DMF:H<sub>2</sub>O (2.5 mL). The solution was stirred for 5 min at room temperature and flushed with argon and then heated to 80 °C for 2 h. The product was concentrated under reduced pressure and isolated by column chromatography on silica gel (2:3 hexanes/EtOAc) to afford 4-(5-methyl-3-phenyl-4-

isoxazoly)benzenesulfonamide (valdecoxib) (**46**) as a colorless solid: mp 160-162 °C (lit.<sup>16</sup> 155-157 °C, lit.<sup>17</sup> 172-173 °C) with spectral properties identical to those previously reported.<sup>16,17</sup>

**Procedure for the palladium-catalyzed carbonylative esterification to form methyl 3,5-diphenylisoxazole-4-carboxylate (47).** To a 4-dram vial was added 4-iodo-3,5-diphenylisoxazole (0.44 mmol, 152 mg), Pd(OAc)<sub>2</sub> (0.0132 mmol, 2.8 mg), DPPF (0.028 mmol, 14.8 mg) in 4:1 DMF:H<sub>2</sub>O (1.25 mL). The reaction mixture was evacuated and back-filled with carbon monoxide three times. A balloon of carbon monoxide was attached to the vial, which was heated to 55 °C for 18 h. The solution was allowed to cool and was diluted with ethyl acetate (20 mL). The organic layer was washed with water and brine, dried and concentrated. The residue was purified by column chromatography using 10:1 hexanes/EtOAc to afford the compound as a colorless solid: mp 94-96 °C; <sup>1</sup>H NMR (CDCl<sub>3</sub> 400 MHz) δ 3.72 (s, 3H), 7.48-7.54 (m, 6H), 7.65-7.67 (m, 2H), 7.67-7.93 (dd, *J* = 7.8, 1.8 Hz, 2H); <sup>13</sup>C NMR (CDCl<sub>3</sub>) δ 52.2, 108.2, 127.0, 128.5 (2 peaks), 128.7, 128.8, 128.9, 129.1, 130.1, 131.5, 163.1, 163.2, 172.7; HRMS Calcd for C<sub>17</sub>H<sub>13</sub>NO<sub>3</sub>: 279.0895. Found: 279.0899.

**Procedure for the palladium-catalyzed carbonylative amidation to form *N*-phenethyl-5-methyl-3-phenylisoxazole-4-carboxamide (48).** A modified literature procedure was used.<sup>18</sup> To a 4-dram vial was added 4-iodo-5-methyl-3-phenylisoxazole (0.17 mmol, 48 mg), PdCl<sub>2</sub>(PPh<sub>3</sub>)<sub>2</sub> (0.0085 mmol, 6 mg), 2-phenethyl amine (0.25 mL) in DMF (1 mL). The reaction mixture was evacuated and back-filled with carbon monoxide three times. A balloon of carbon monoxide was placed on the vial, which was heated to 80 °C for 18 h. The solution was allowed to cool and was diluted with ethyl acetate (20 mL). The organic layer was washed with water and brine, dried and concentrated. The residue was purified by column chromatography using 4:1 hexanes/EtOAc to afford the compound as a colorless solid: mp 145-146 °C; <sup>1</sup>H NMR (CDCl<sub>3</sub> 400 MHz) δ 1.51 (s, 3H), 2.71 (t, *J* = 6.8 Hz, 2H), 3.51-3.56 (q, *J* = 6.8 Hz, 2H), 5.41 (br s, 1H), 6.96-6.98 (dd, *J* = 7.2, 1.6 Hz, 2H), 7.20-7.26 (m, 3H), 7.39-7.50 (m, 5H); <sup>13</sup>C NMR (CDCl<sub>3</sub>) δ

13.2, 35.2, 40.7, 111.2, 126.8, 128.3, 128.7, 128.9, 129.1, 129.3, 130.6, 138.5, 160.3, 161.7, 174.3; HRMS Calcd for C<sub>19</sub>H<sub>18</sub>N<sub>2</sub>O<sub>2</sub>: 306.1368. Found: 306.1374.

**Procedure for the Sonogashira coupling to form 5-methyl-3-phenyl-4-(phenylethynyl)isoxazole (49).** To a 4-dram vial was added 4-iodo-5-methyl-3-phenylisoxazole (0.5 mmol, 142 mg), phenyl acetylene (0.6 mmol, 61.2 mg), PdCl<sub>2</sub>(PPh<sub>3</sub>)<sub>2</sub> (0.005 mmol, 3.5 mg), CuI (0.01 mmol, 1.9 mg), DMF (1.5 mL) and Et<sub>2</sub>NH (1.85 mL). The solution was stirred for 5 minutes at room temperature and flushed with argon and then heated to 50 °C for 6 h. The solution was allowed to cool and was diluted with ethyl acetate (20 mL). The organic layer was washed with water and brine, dried and concentrated. The residue was purified by column chromatography using 10:1 hexanes/EtOAc to afford the compound as a brown solid: mp 98-100 °C; <sup>1</sup>H NMR (CDCl<sub>3</sub>, 400 MHz) δ 2.58 (s, 3H), 7.35 (t, *J* = 4.2 Hz, 3H), 7.46-7.51 (m, 5H), 8.09-8.12 (dd, *J* = 7.2, 4.2 Hz, 2H); <sup>13</sup>C NMR (CDCl<sub>3</sub>) δ 12.3, 78.4, 95.1, 99.5, 122.9, 127.7, 128.6, 128.7, 128.8, 130.3, 131.6, 161.3, 173.1; HRMS Calcd for C<sub>18</sub>H<sub>13</sub>NO: 259.0997. Found: 259.1001.

**Procedure for the Heck coupling to form (E)-3-(5-methyl-3-phenylisoxazol-4-yl)-1-morpholinoprop-2-en-1-one (50).** To a 4-dram vial was added 4-iodo-5-methyl-3-phenylisoxazole (0.25 mmol, 71 mg), *N*-acryloylmorpholine (1.0 mmol, 141 mg), PdOAc<sub>2</sub> (0.0132 mmol, 2.8 mg), TBAC (0.25 mmol, 69 mg), Na<sub>2</sub>CO<sub>3</sub> (0.625 mmol, 66 mg) and DMF (1 mL), which was then heated to 85 °C for 24 h. The solution was allowed to cool and was diluted with ethyl acetate (20 mL). The organic layer was washed with water and brine, dried and concentrated. The residue was purified by column chromatography using 1:1 hexanes/EtOAc to afford the compound as a yellow oil; <sup>1</sup>H NMR (CDCl<sub>3</sub>, 400 MHz) δ 2.59 (s, 3H), 3.27 (br s, 2H), 3.60 (br s, 2H), 3.68 (br s, 4H), 6.28-6.33 (d, *J* = 15.3 Hz, 1H), 7.46-7.51 (m, 4H), 7.53-7.58 (m, 2H); <sup>13</sup>C NMR (CDCl<sub>3</sub>) δ 12.3, 42.5, 46.0, 66.8, 111.7, 118.5, 128.9, 129.0, 129.2, 130.0, 130.8, 161.8, 165.1, 169.3; HRMS Calcd for C<sub>17</sub>H<sub>18</sub>N<sub>2</sub>O<sub>3</sub>: 298.1317. Found: 298.1321.

## References

1. Tohda, Y.; Sonogashira, K.; Hagihara, N. *Synthesis* **1977**, 777.
2. Herrero, M. T.; Tellitu, I.; Domínguez, E.; Hernández, S.; Moreno, I., San Martín, R. *Tetrahedron* **2002**, 58, 8581.
3. Moody, C. J.; Ward, J. G. *J. Chem. Soc., Perkin. Trans. I.* **1984**, 2903.
4. Parker, K. A.; Ledebor, M. W. *J. Org. Chem.* **1996**, 61, 3214.
5. Van den Hoven, B. G.; El Ali, B.; Alper, H. *J. Org. Chem.* **2000**, 65, 4131.
6. Alonso, D. A.; Nájera, C.; Pacheco, M. C. *J. Org. Chem.* **2004**, 69, 1615.
7. Waldo, J. P.; Larock, R. C. *Org. Lett.* **2005**, 23, 5203.
8. Cox, R. J.; Ritson, D. J.; Dane, T. A.; Berge, J.; Charmant, J. P. H.; Kantacha, A. *Chem. Commun.* **2005**, 1037.
9. Fetter, J.; Nagy, I.; Giang, L. T.; Kajtar-Peredy, M.; Rockenbauer, A.; Korecz, L.; Czira, G. *J. Chem. Soc., Perkin Trans. 1* **2001**, 1131.
10. Kang, S.; Ryu, H.; Hong, Y. *J. Chem. Soc., Perkin Trans. 1* **2001**, 736.
11. Negishi, E.; Qian, M.; Zeng, F.; Nastasia, L.; Babinski, D. *Org. Lett.* **2003**, 5, 1597.
12. Rao, P. N. P.; Uddin, M. J.; Knaus, E. E. *J. Med. Chem.* **2004**, 47, 3972.
13. Fukuyama, T.; Yamaura, R.; Ryu, I. *Can. J. Chem.* **2005**, 83, 711.
14. Mahomed Ahmed, M. S.; Mori, A. *Org. Lett.* **2003**, 5, 3057.
15. Lerebours, R.; Camacho-Soto, A.; Wolf, C. *J. Org. Chem.* **2005**, 70, 8601.
16. J. J. Talley (G. D. Searle & Company), U.S. Patent 5,859,257, 1999; *Chem. Abstr.* **1999**, 130, 110269.
17. Talley, J. J.; Brown, D. L.; Carter, J. S.; Graneto, M. J.; Koboldt, C. M.; Masferrer, J. L.; Perkins, W. E.; Rogers, R. S.; Shaffer, A. F.; Zhang, Y. Y.; Zweifel, B. S.; Seibert, K. *J. Med. Chem.* **2000**, 43, 775.
18. Schoenberg, A.; Heck, R. F. *J. Org. Chem.* **1974**, 39, 3327.

8.233  
8.215  
8.130  
8.110  
8.089  
7.756  
7.735  
7.675  
7.656  
7.638  
7.556  
7.537  
7.518  
7.479  
7.269

4.438  
4.420  
4.402  
4.385

1.436  
1.418  
1.400

0.000

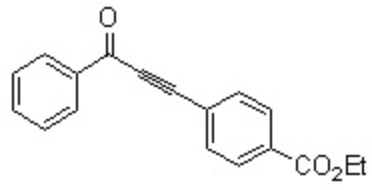

ethyl 4-(3-oxo-3-phenylprop-1-ynyl)benzoate

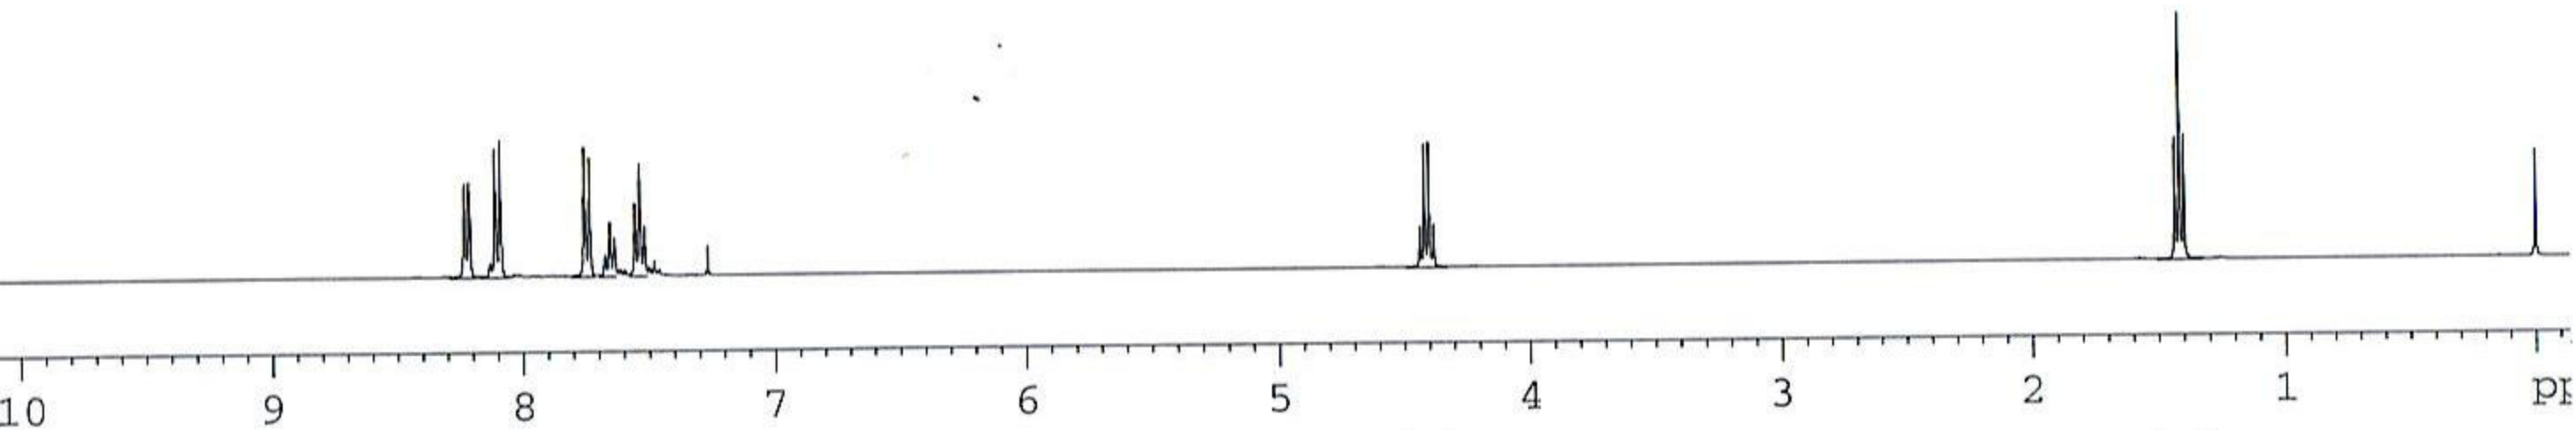

1.768  
2.148  
1.937  
0.983  
1.961

S16

2.000

2.881



— 177.9100

— 165.7634

136.7881  
134.5589  
132.9818  
132.2767  
129.8428  
129.8011  
128.8912  
124.6300

— 91.5414  
— 88.6639

— 61.6714

— 14.4988

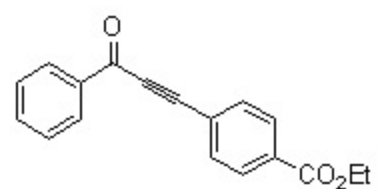

ethyl 4-(3-oxo-3-phenylprop-1-ynyl)benzoate

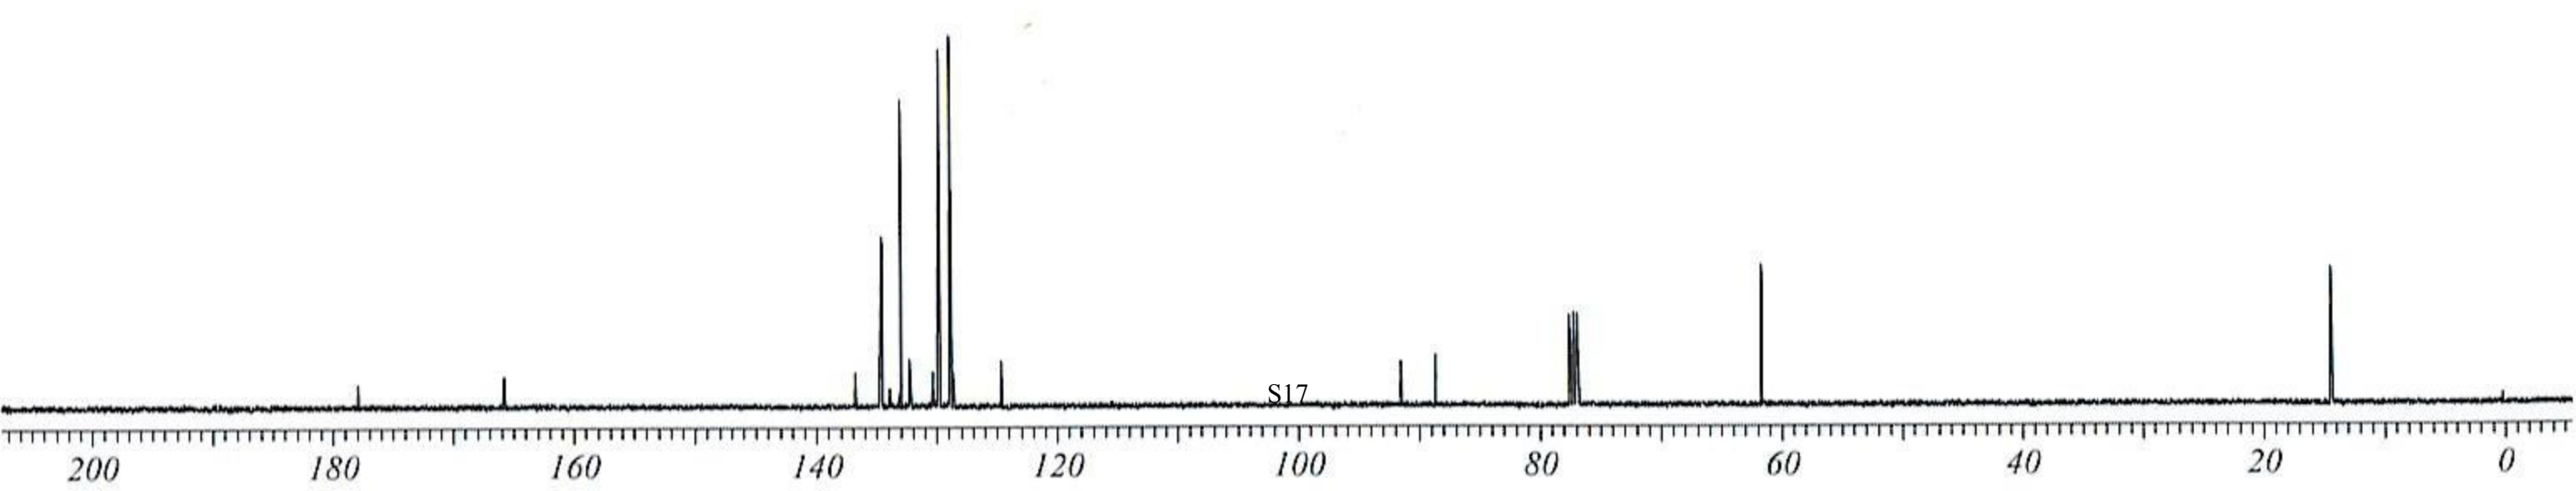

—176.1699

—154.2726

—132.9628

—132.1819

—130.3280

—128.7206

—125.7029

—121.0323

—110.8304

—91.2760

—87.5569

—40.2972

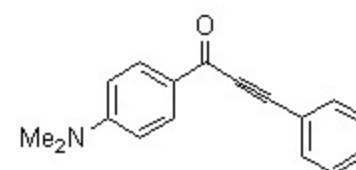

1-(4-(dimethylamino)phenyl)-3-phenylprop-2-yn-1-one

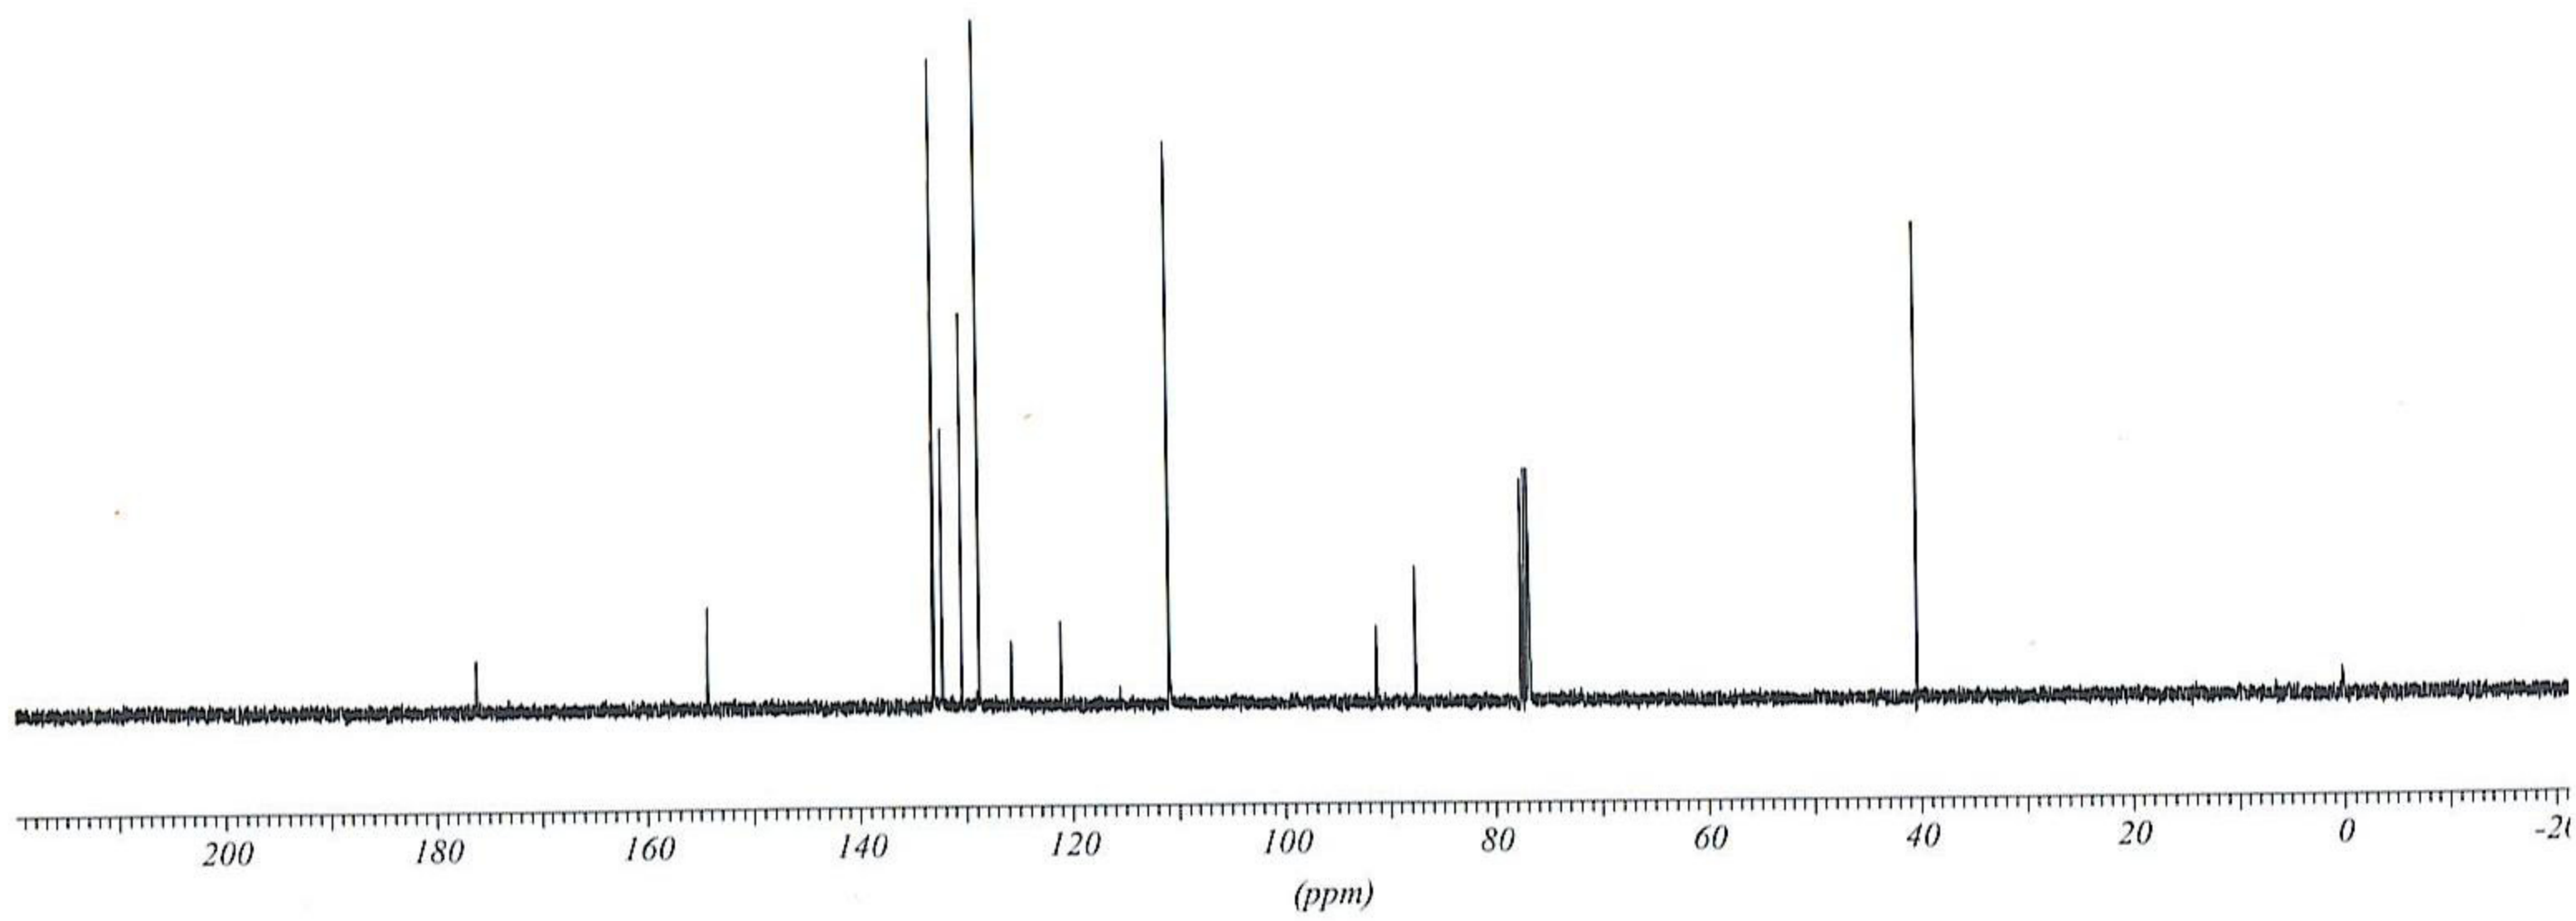

8.118  
8.113  
8.100  
8.095  
7.669  
7.666  
7.662  
7.649  
7.645  
7.446  
7.432  
7.428  
7.416  
7.414  
7.396  
6.692  
6.669

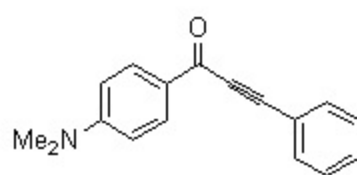

1-(4-(dimethylamino)phenyl)-3-phenylprop-2-yn-1-one

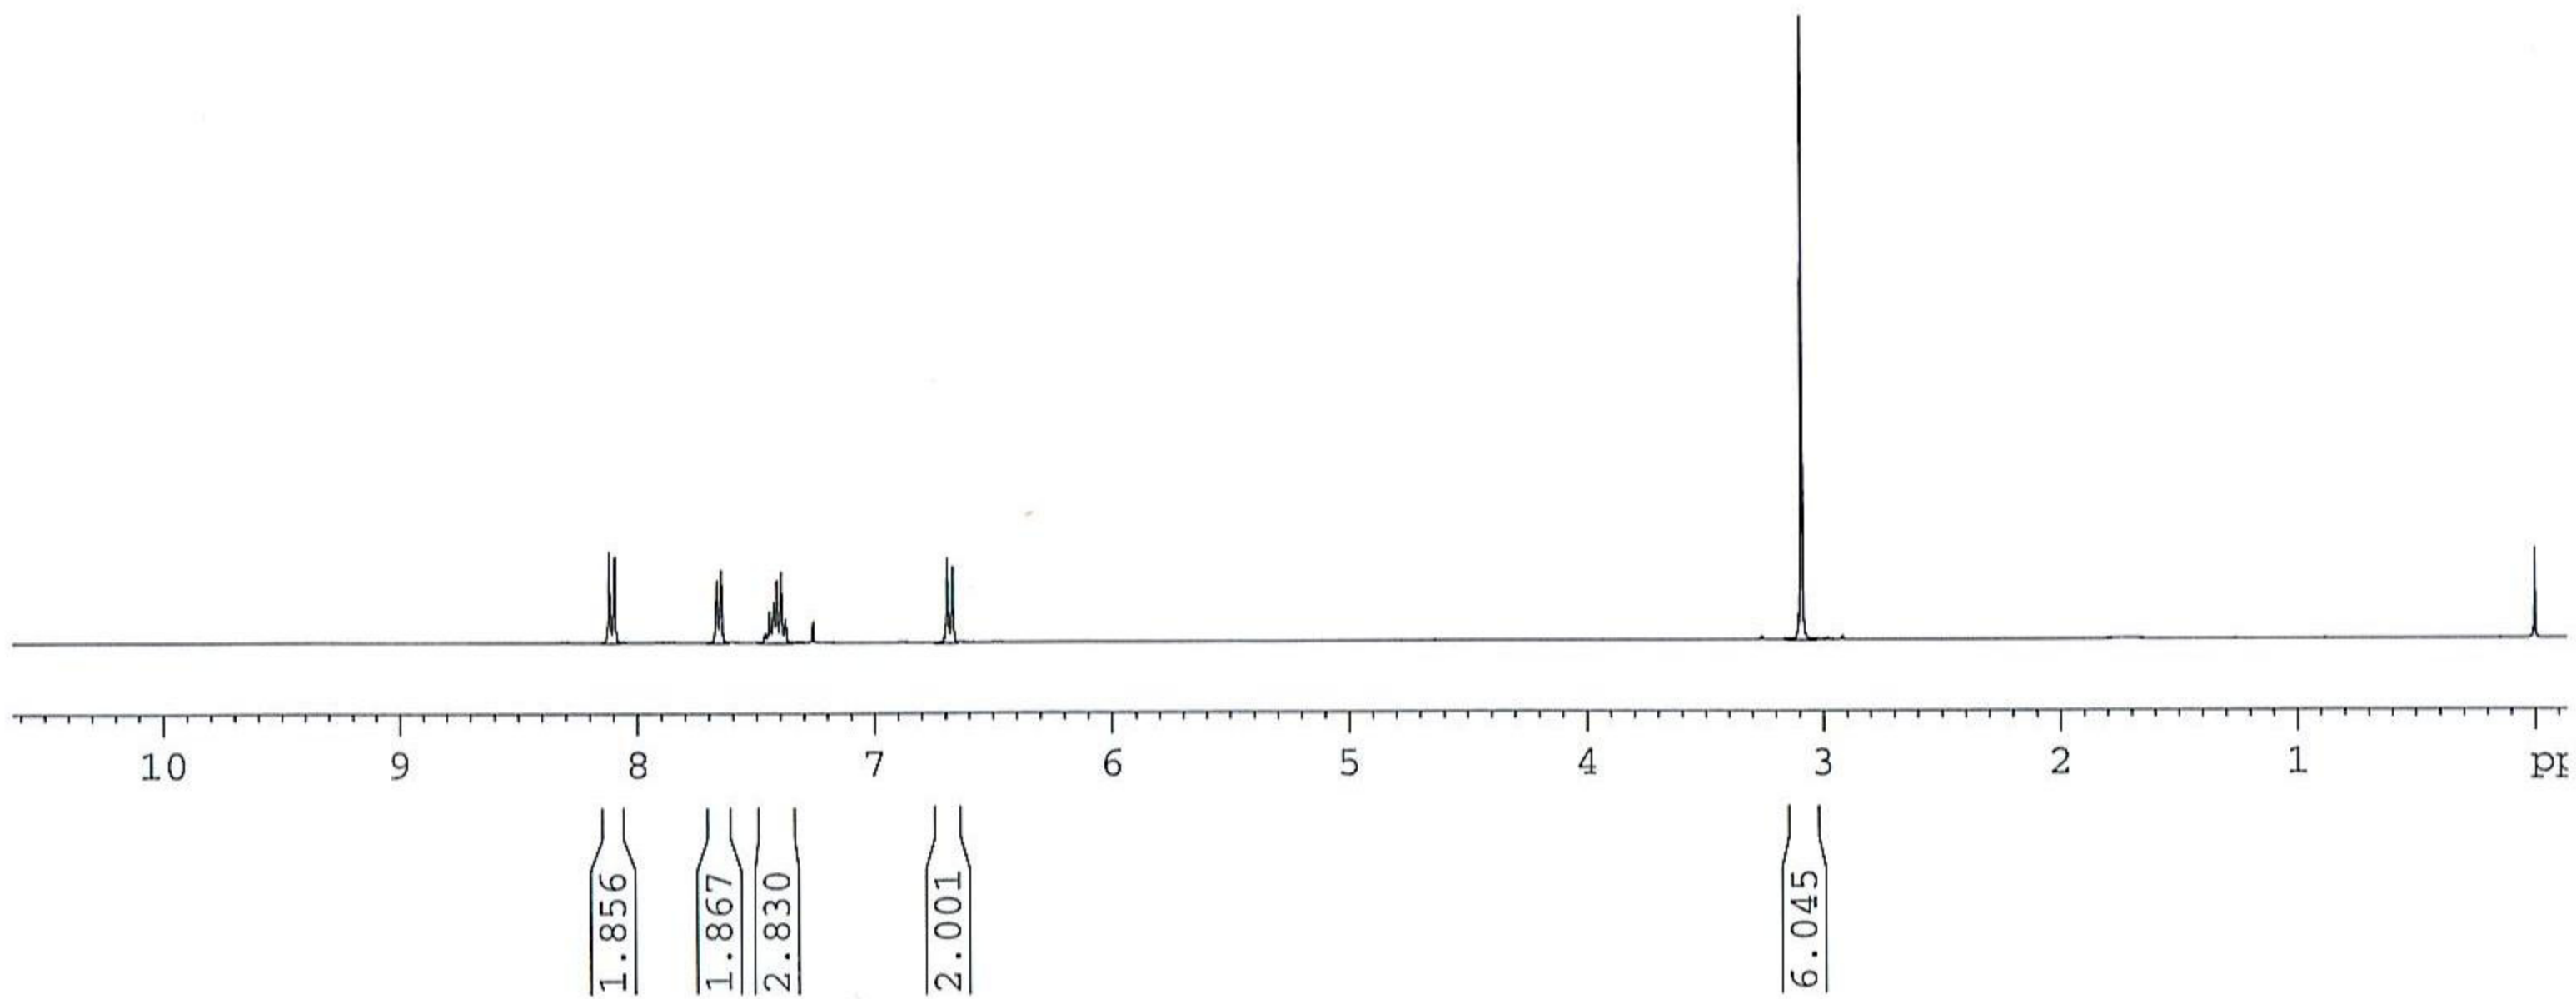

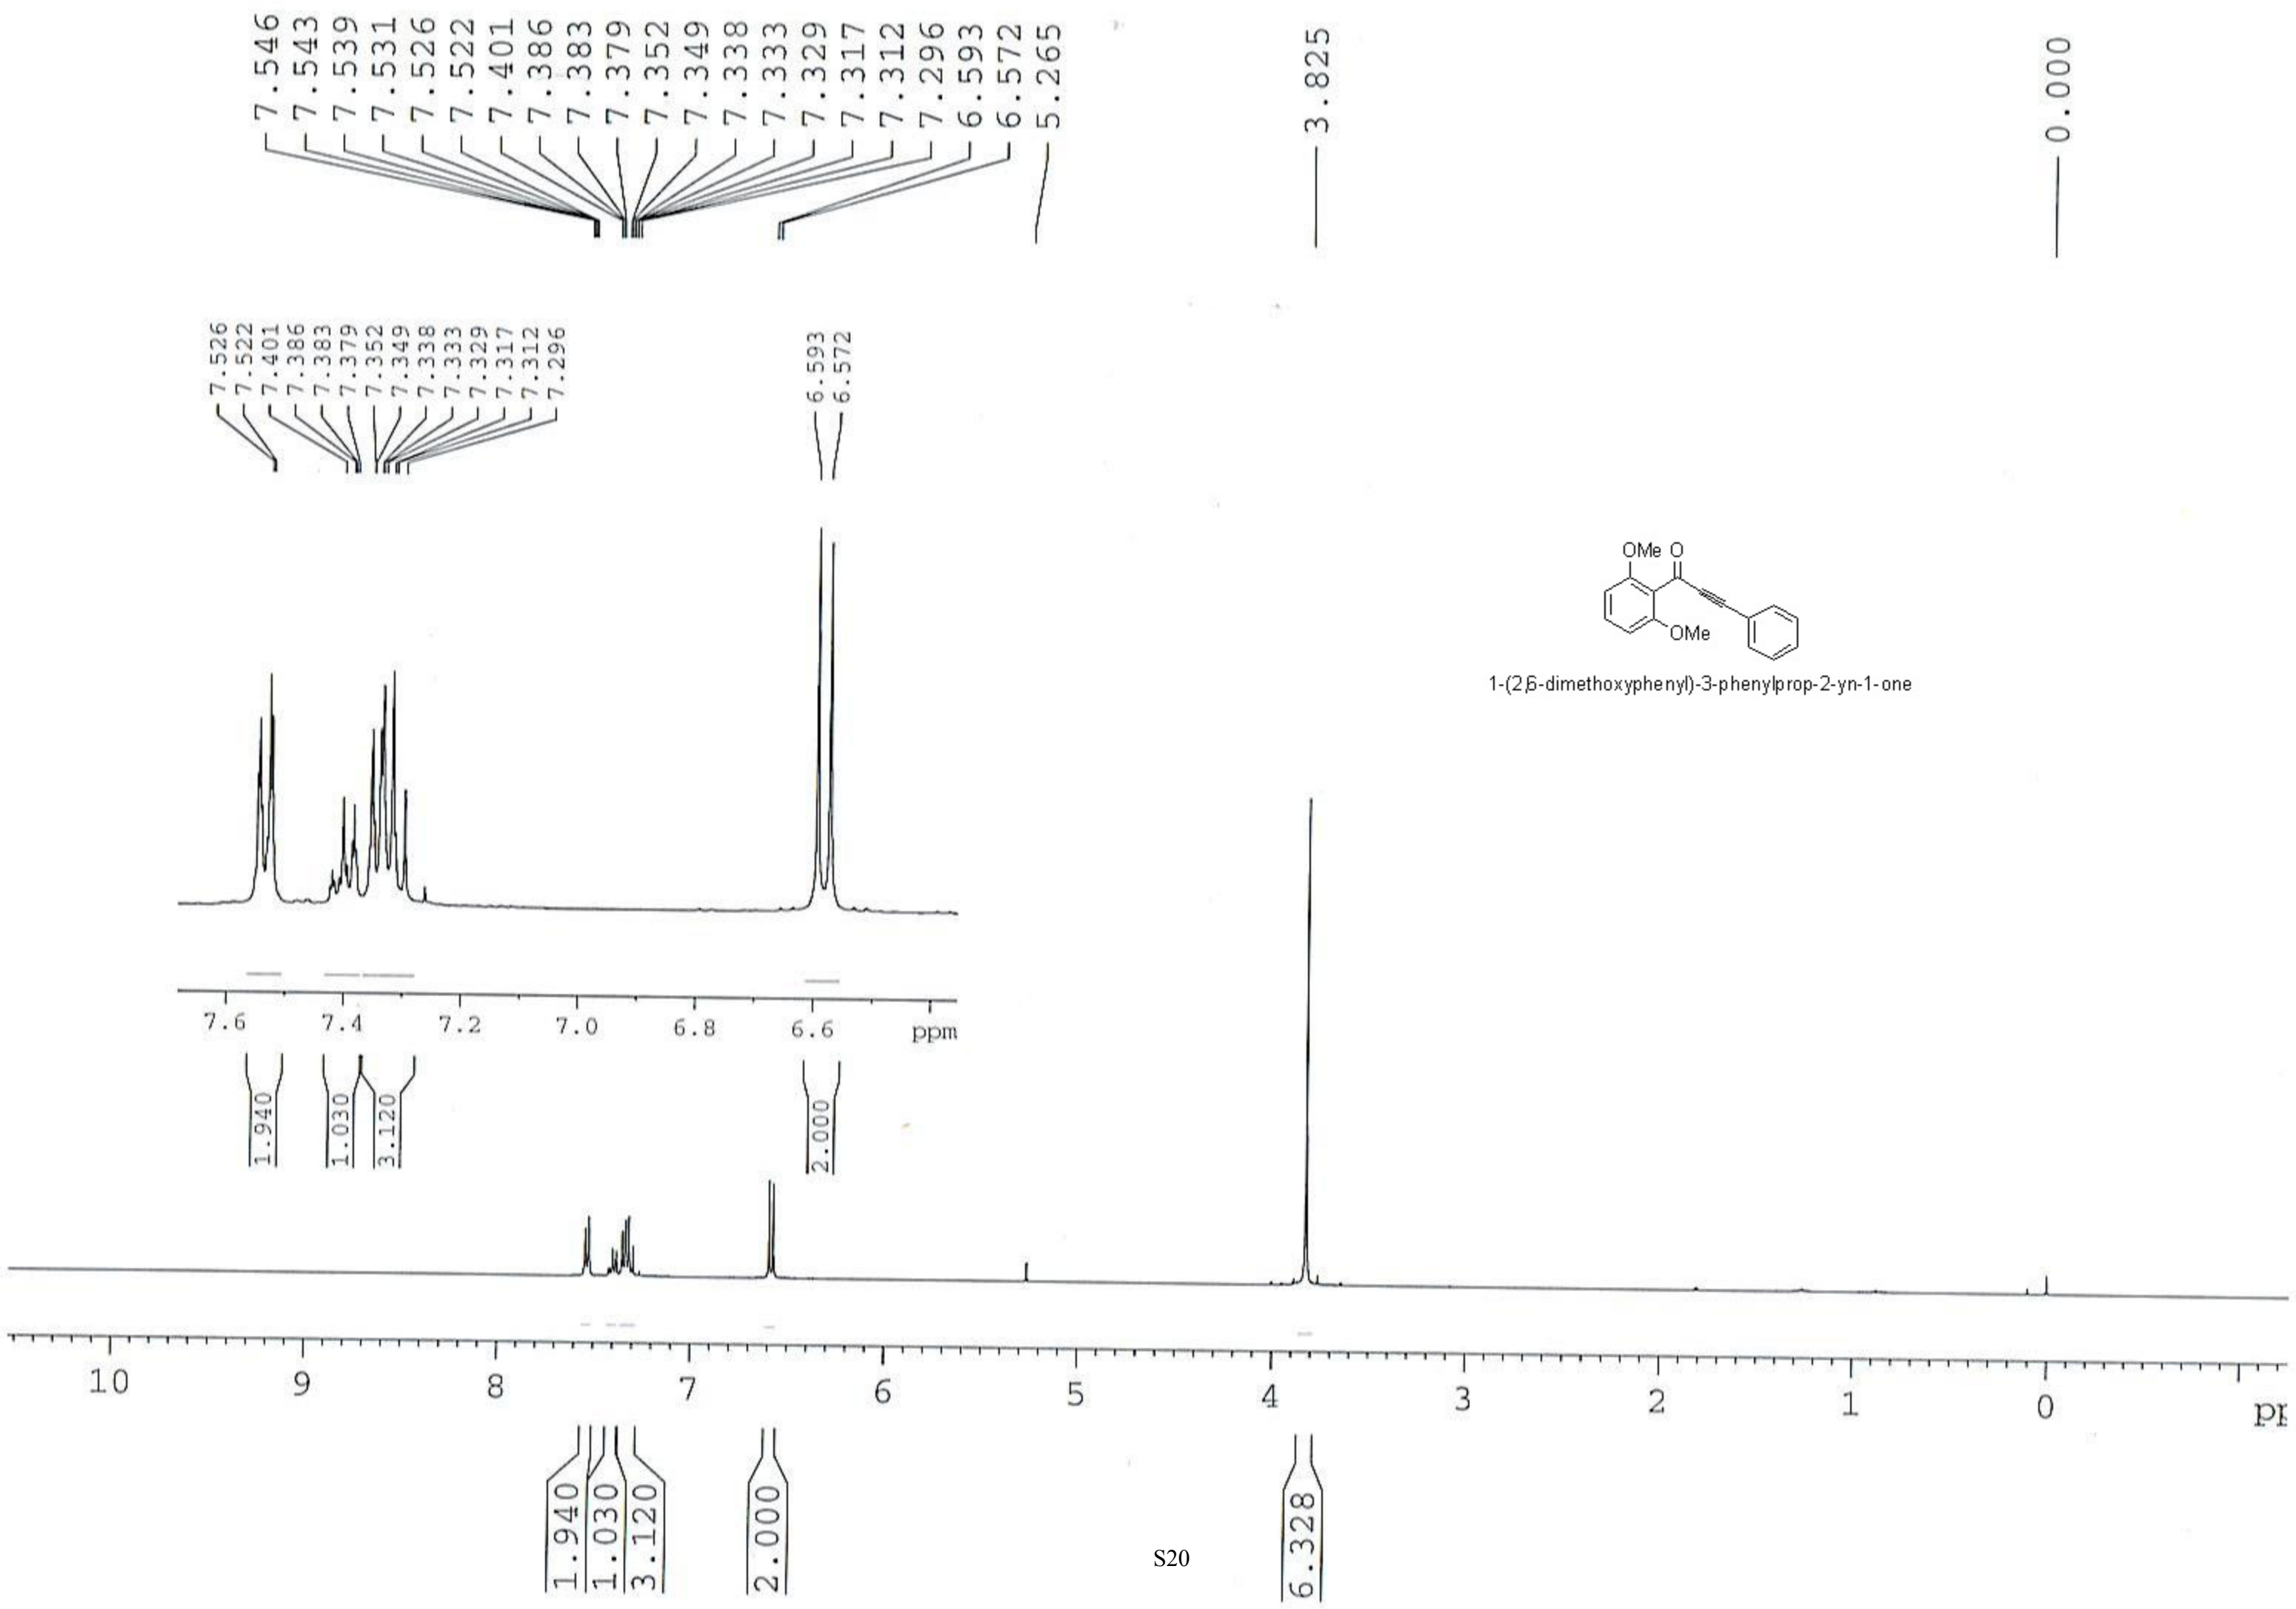

178.518

158.144

133.028

132.164

130.500

128.561

120.559

119.009

104.290

90.518

90.071

56.139

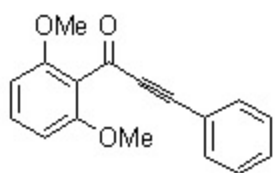

1-(2,6-dimethoxyphenyl)-3-phenylprop-2-yn-1-one

200 180 160 140 120 100 80 60 40 20 0 ppm

s21

— 176.4770

— 154.3332  
— 151.5051

— 136.3104  
— 133.3571  
— 132.2615  
— 131.3782  
— 128.9102  
— 123.6709  
— 119.6220

— 94.8396

— 86.3931

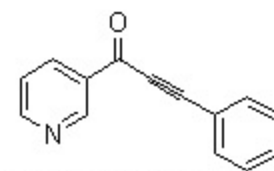

3-phenyl-1-(pyridin-3-yl)prop-2-yn-1-one

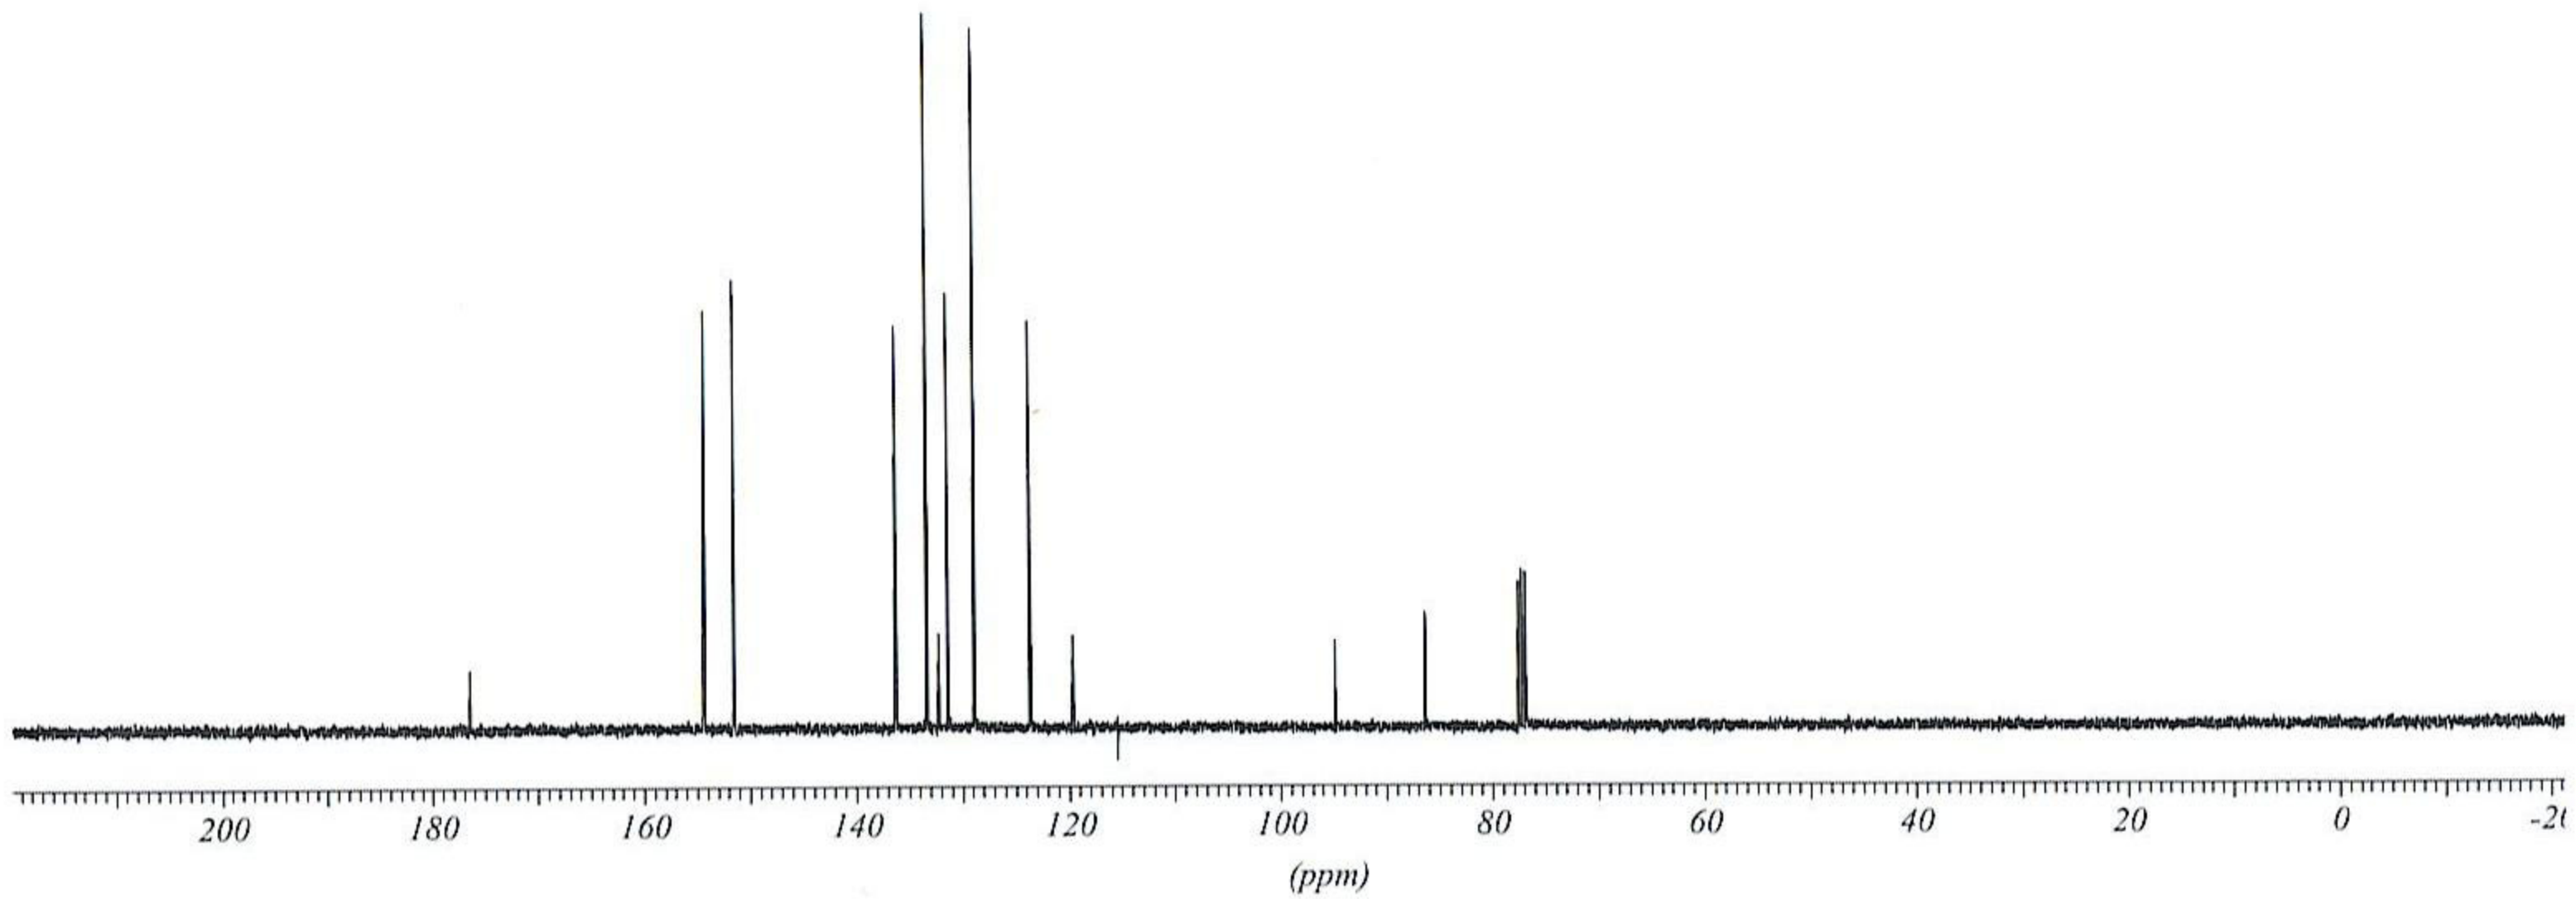

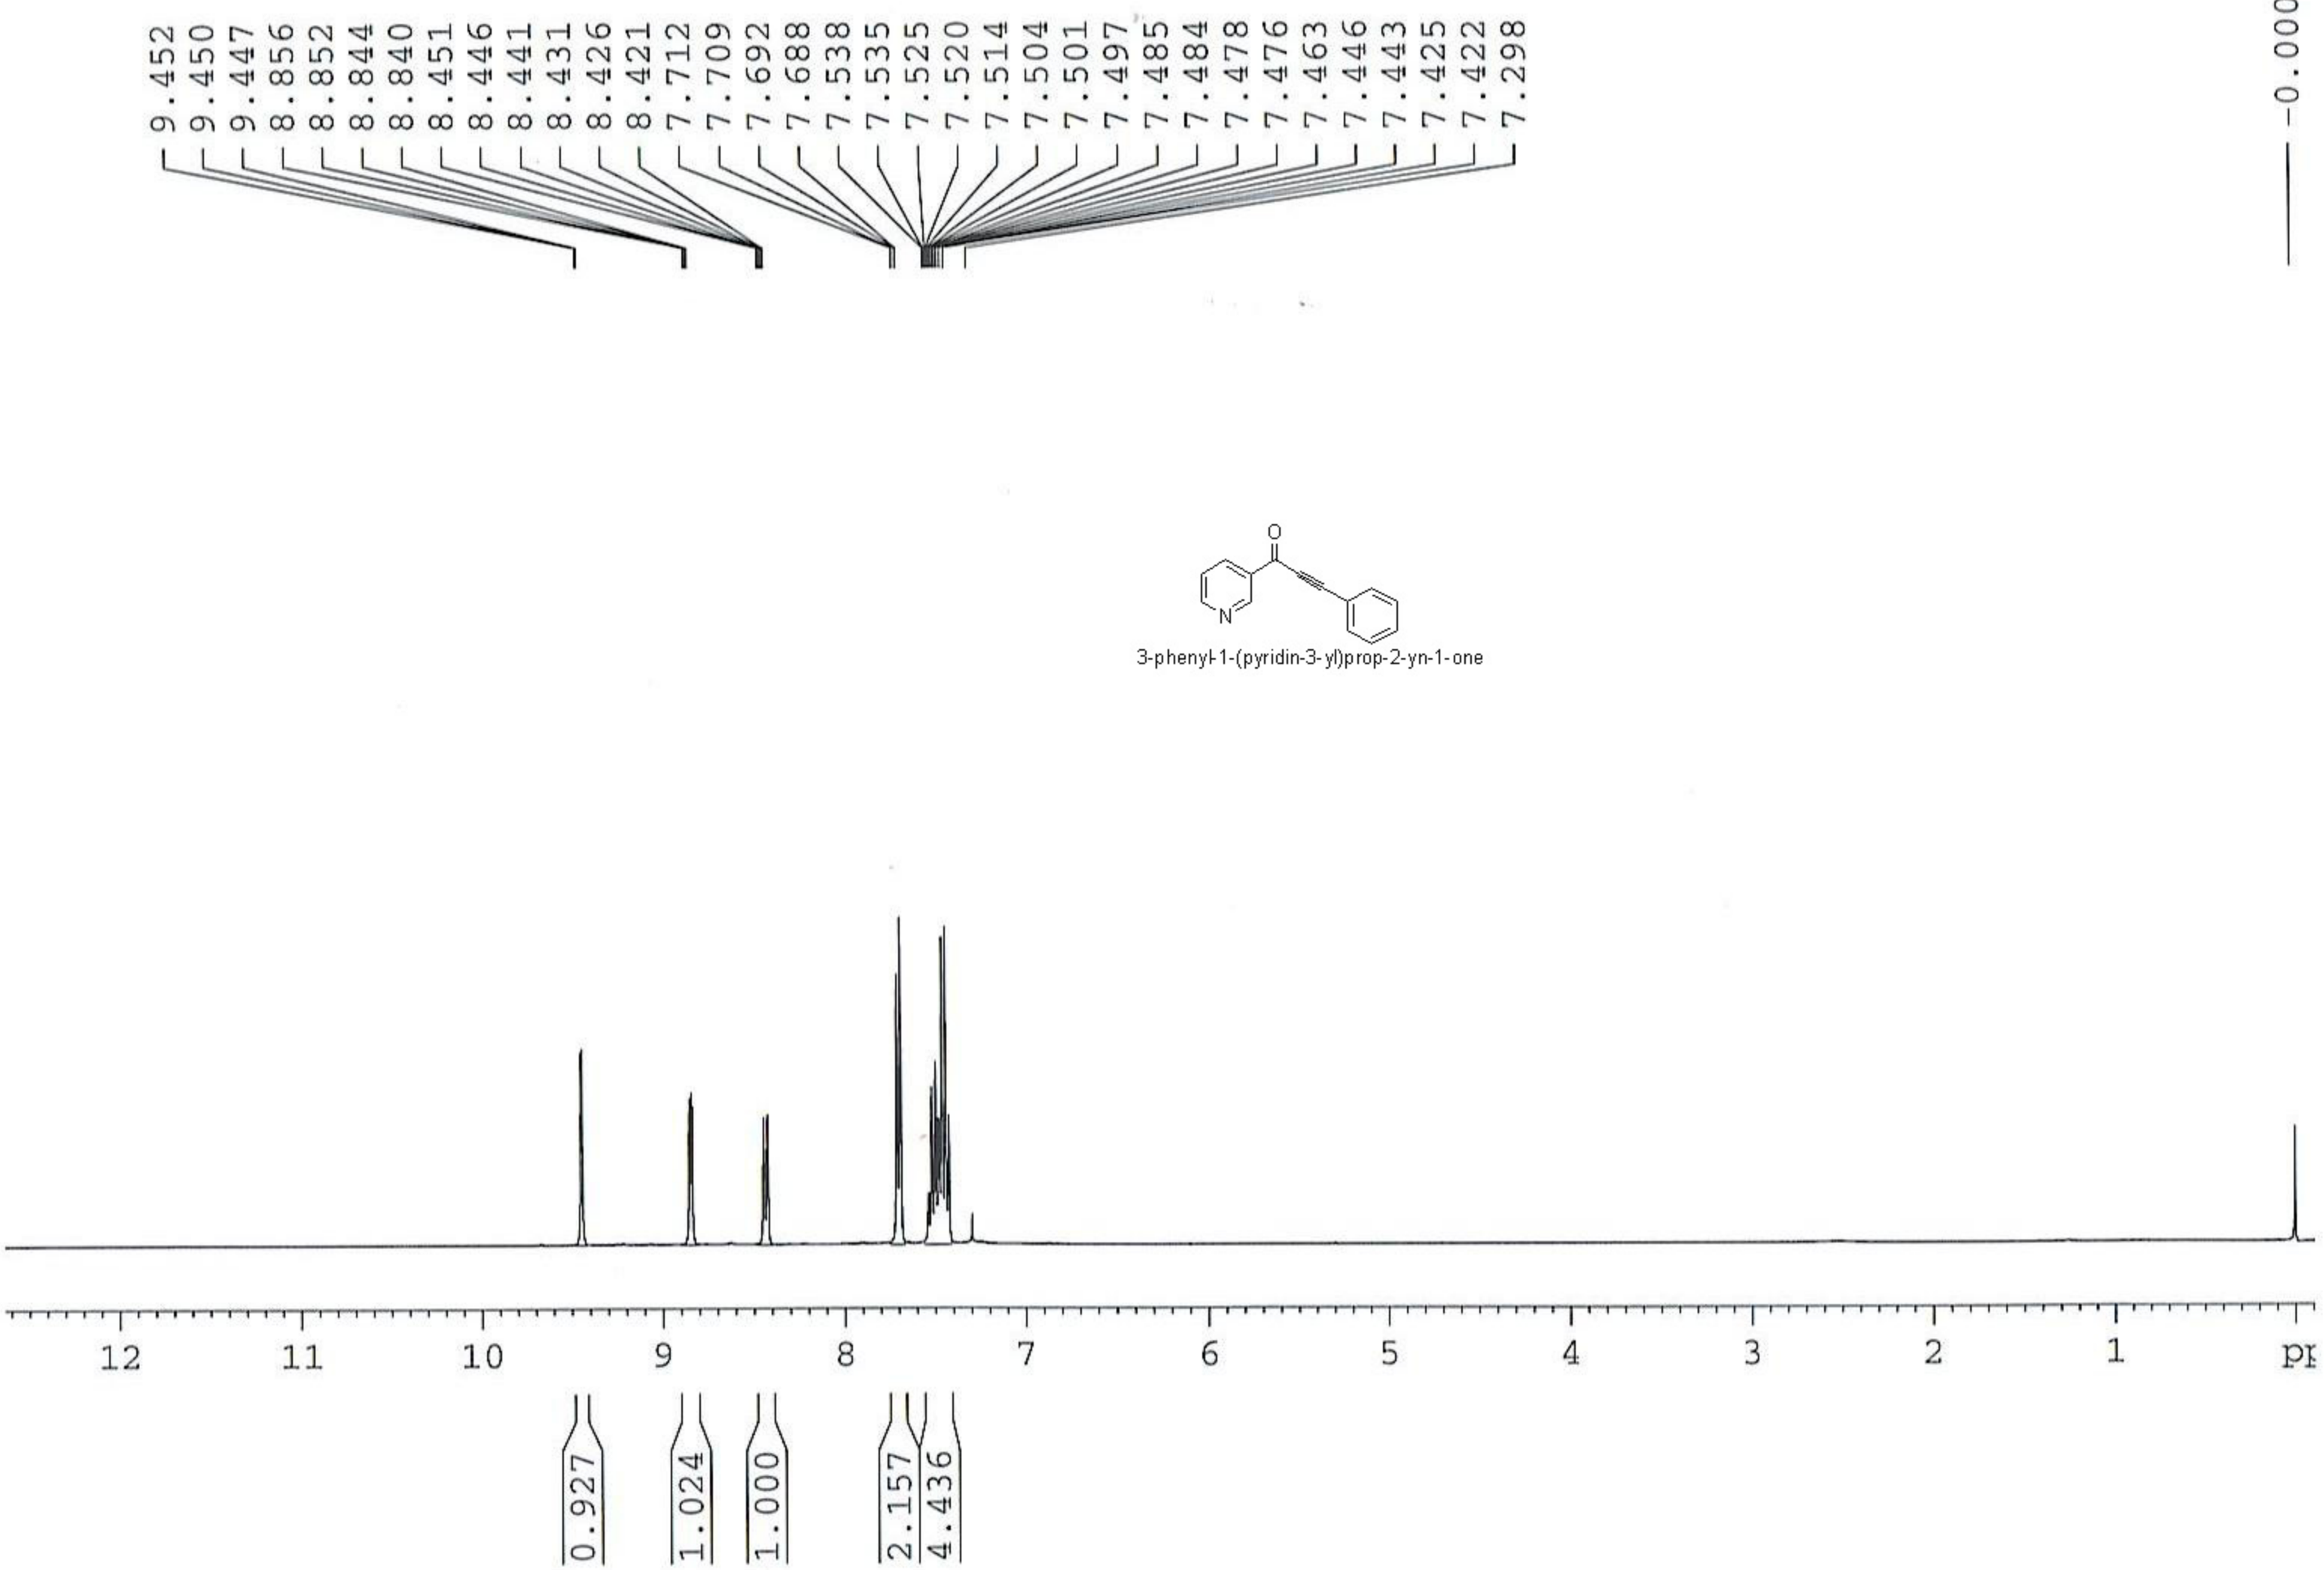

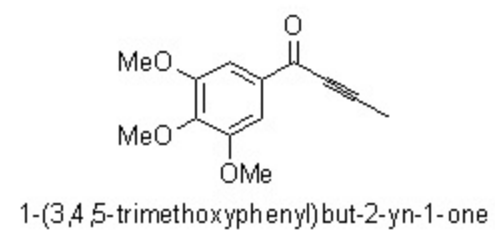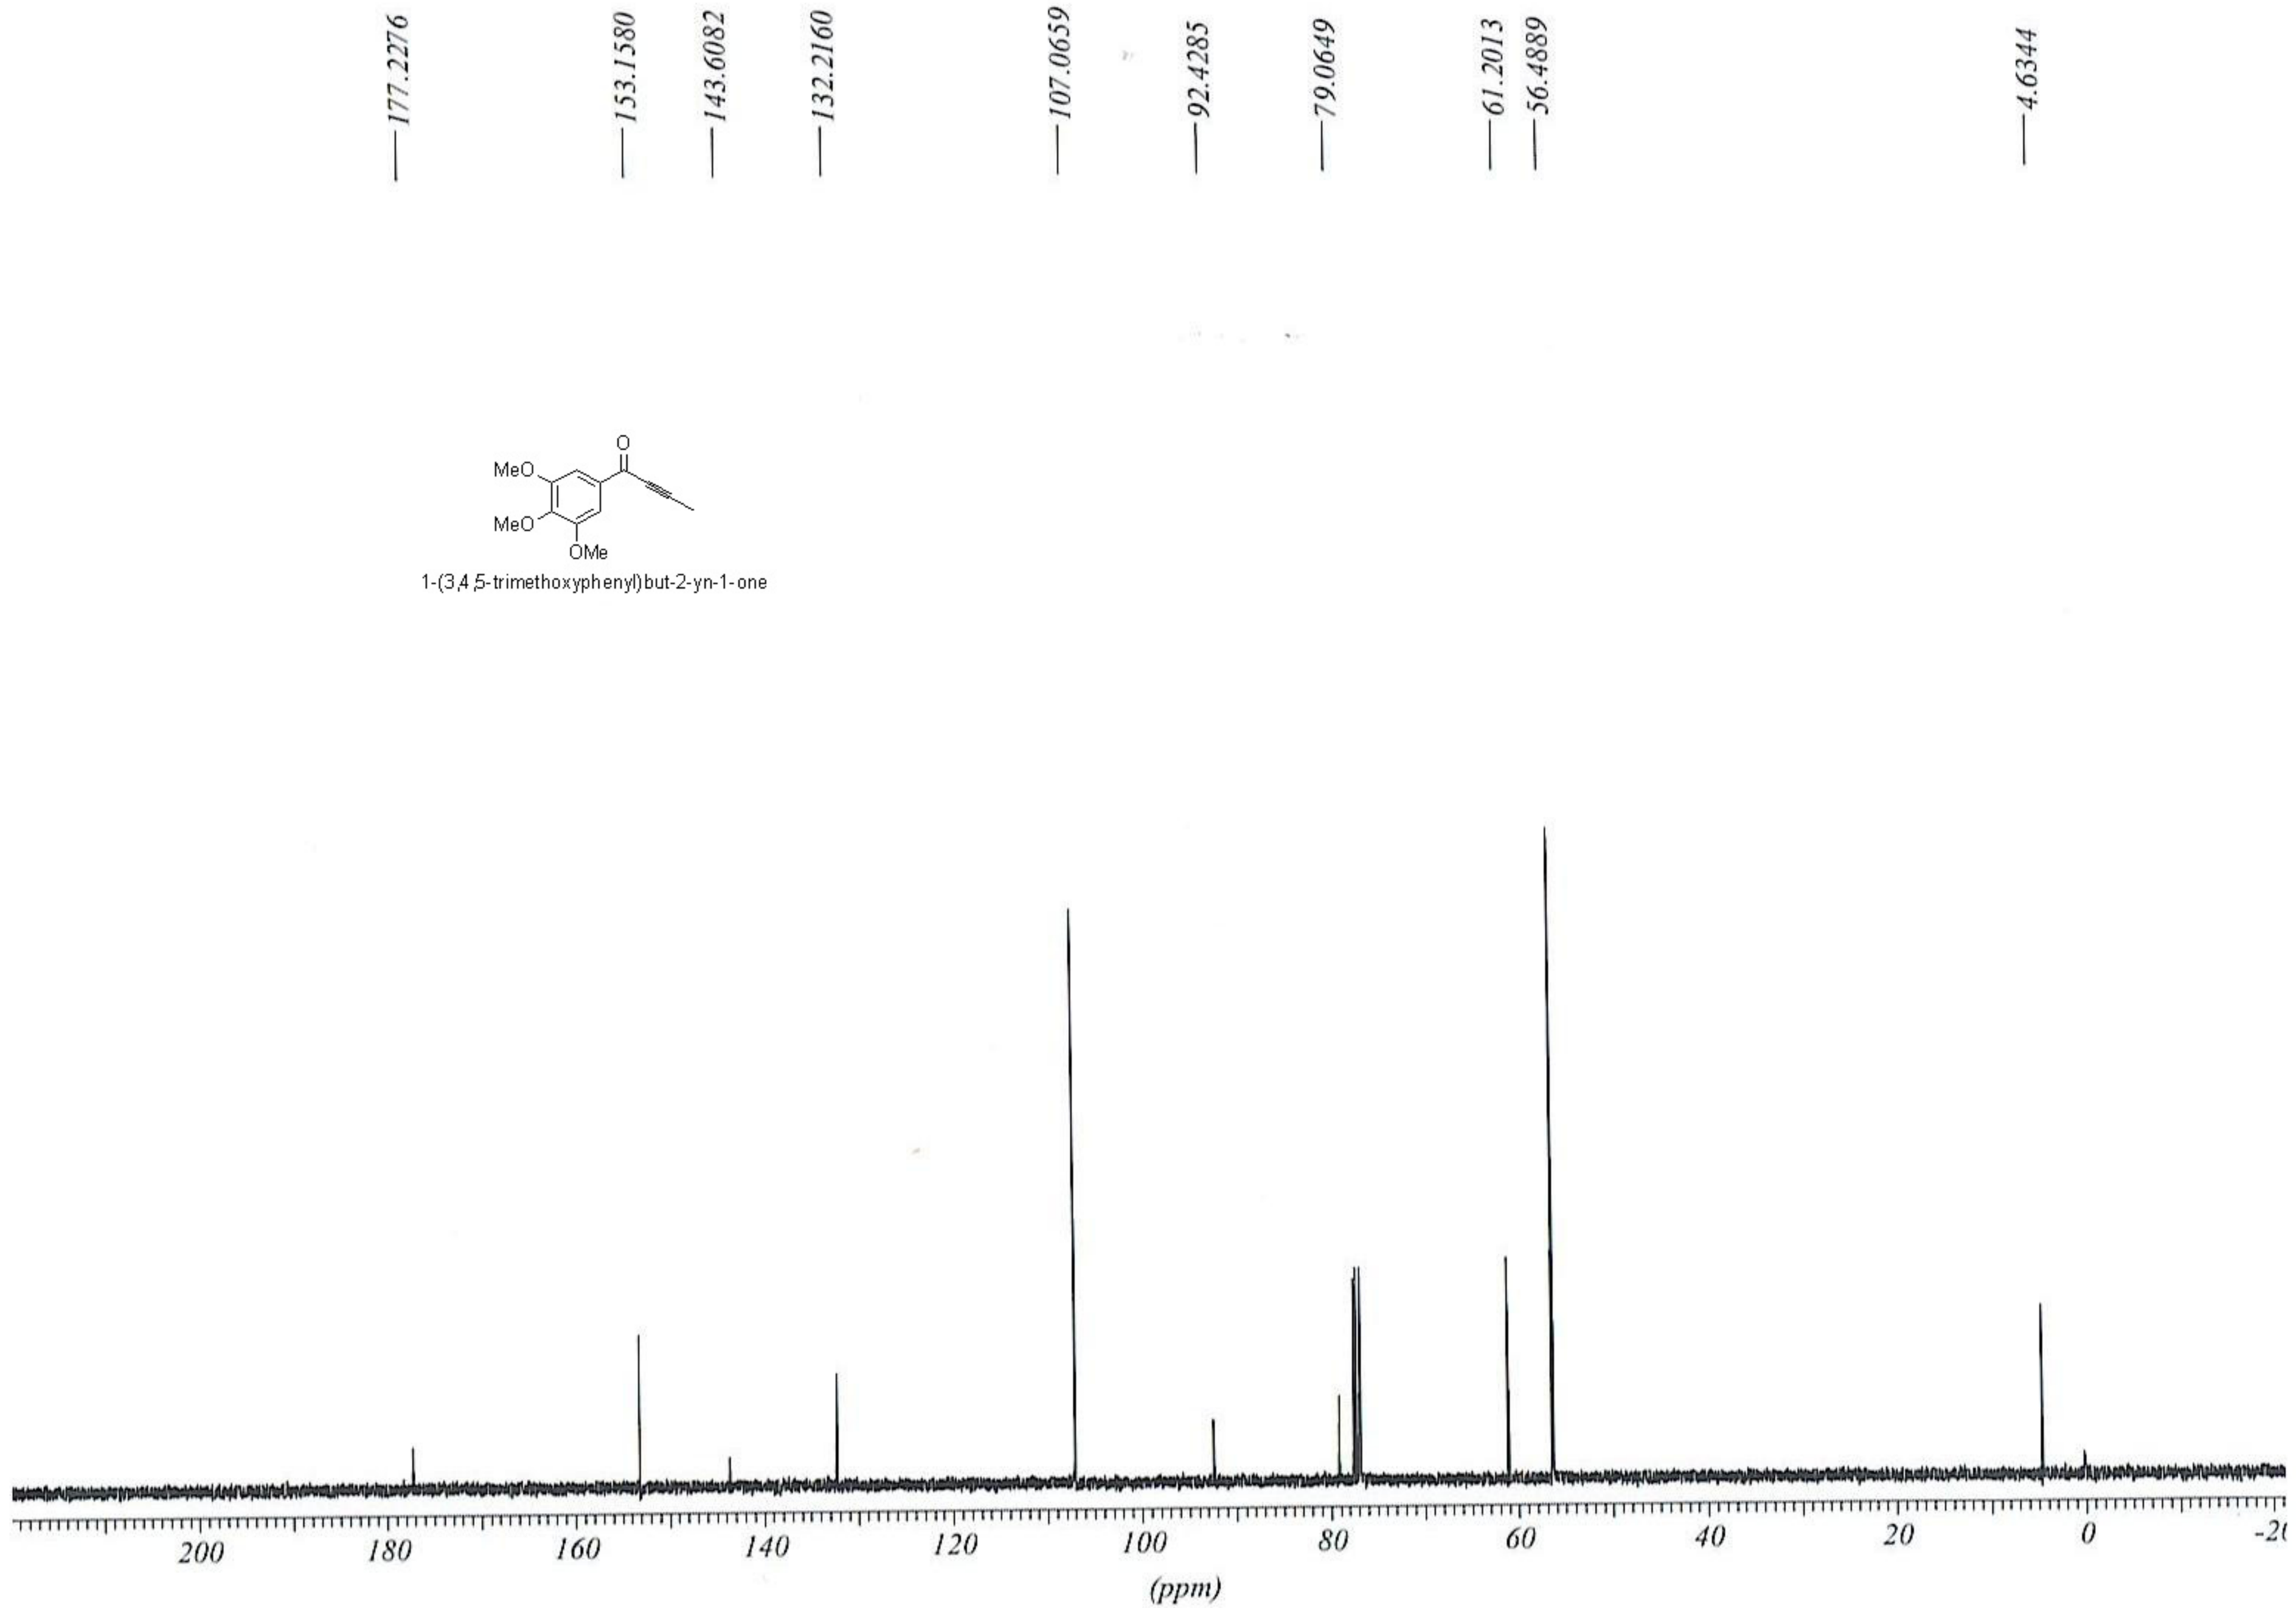



—7.4111

—3.9365

—2.1711

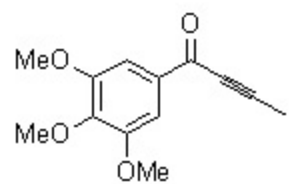

1-(3,4,5-trimethoxyphenyl)but-2-yn-1-one

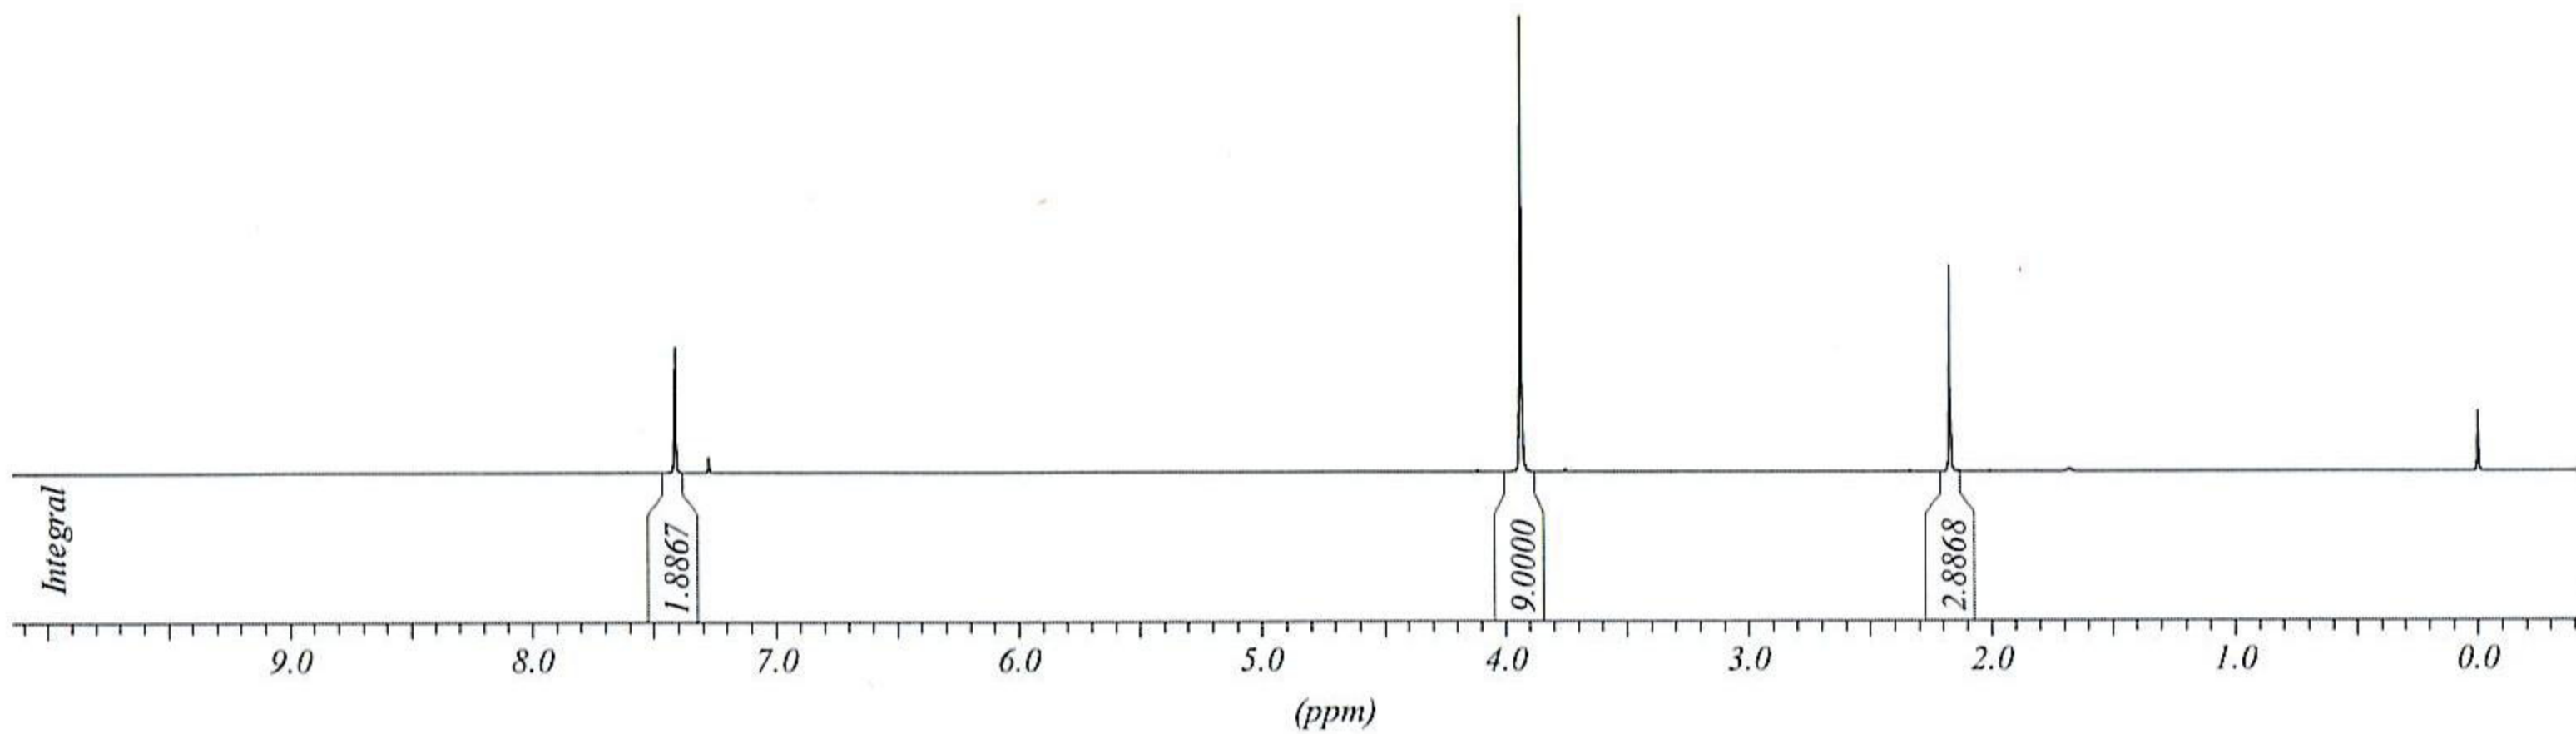

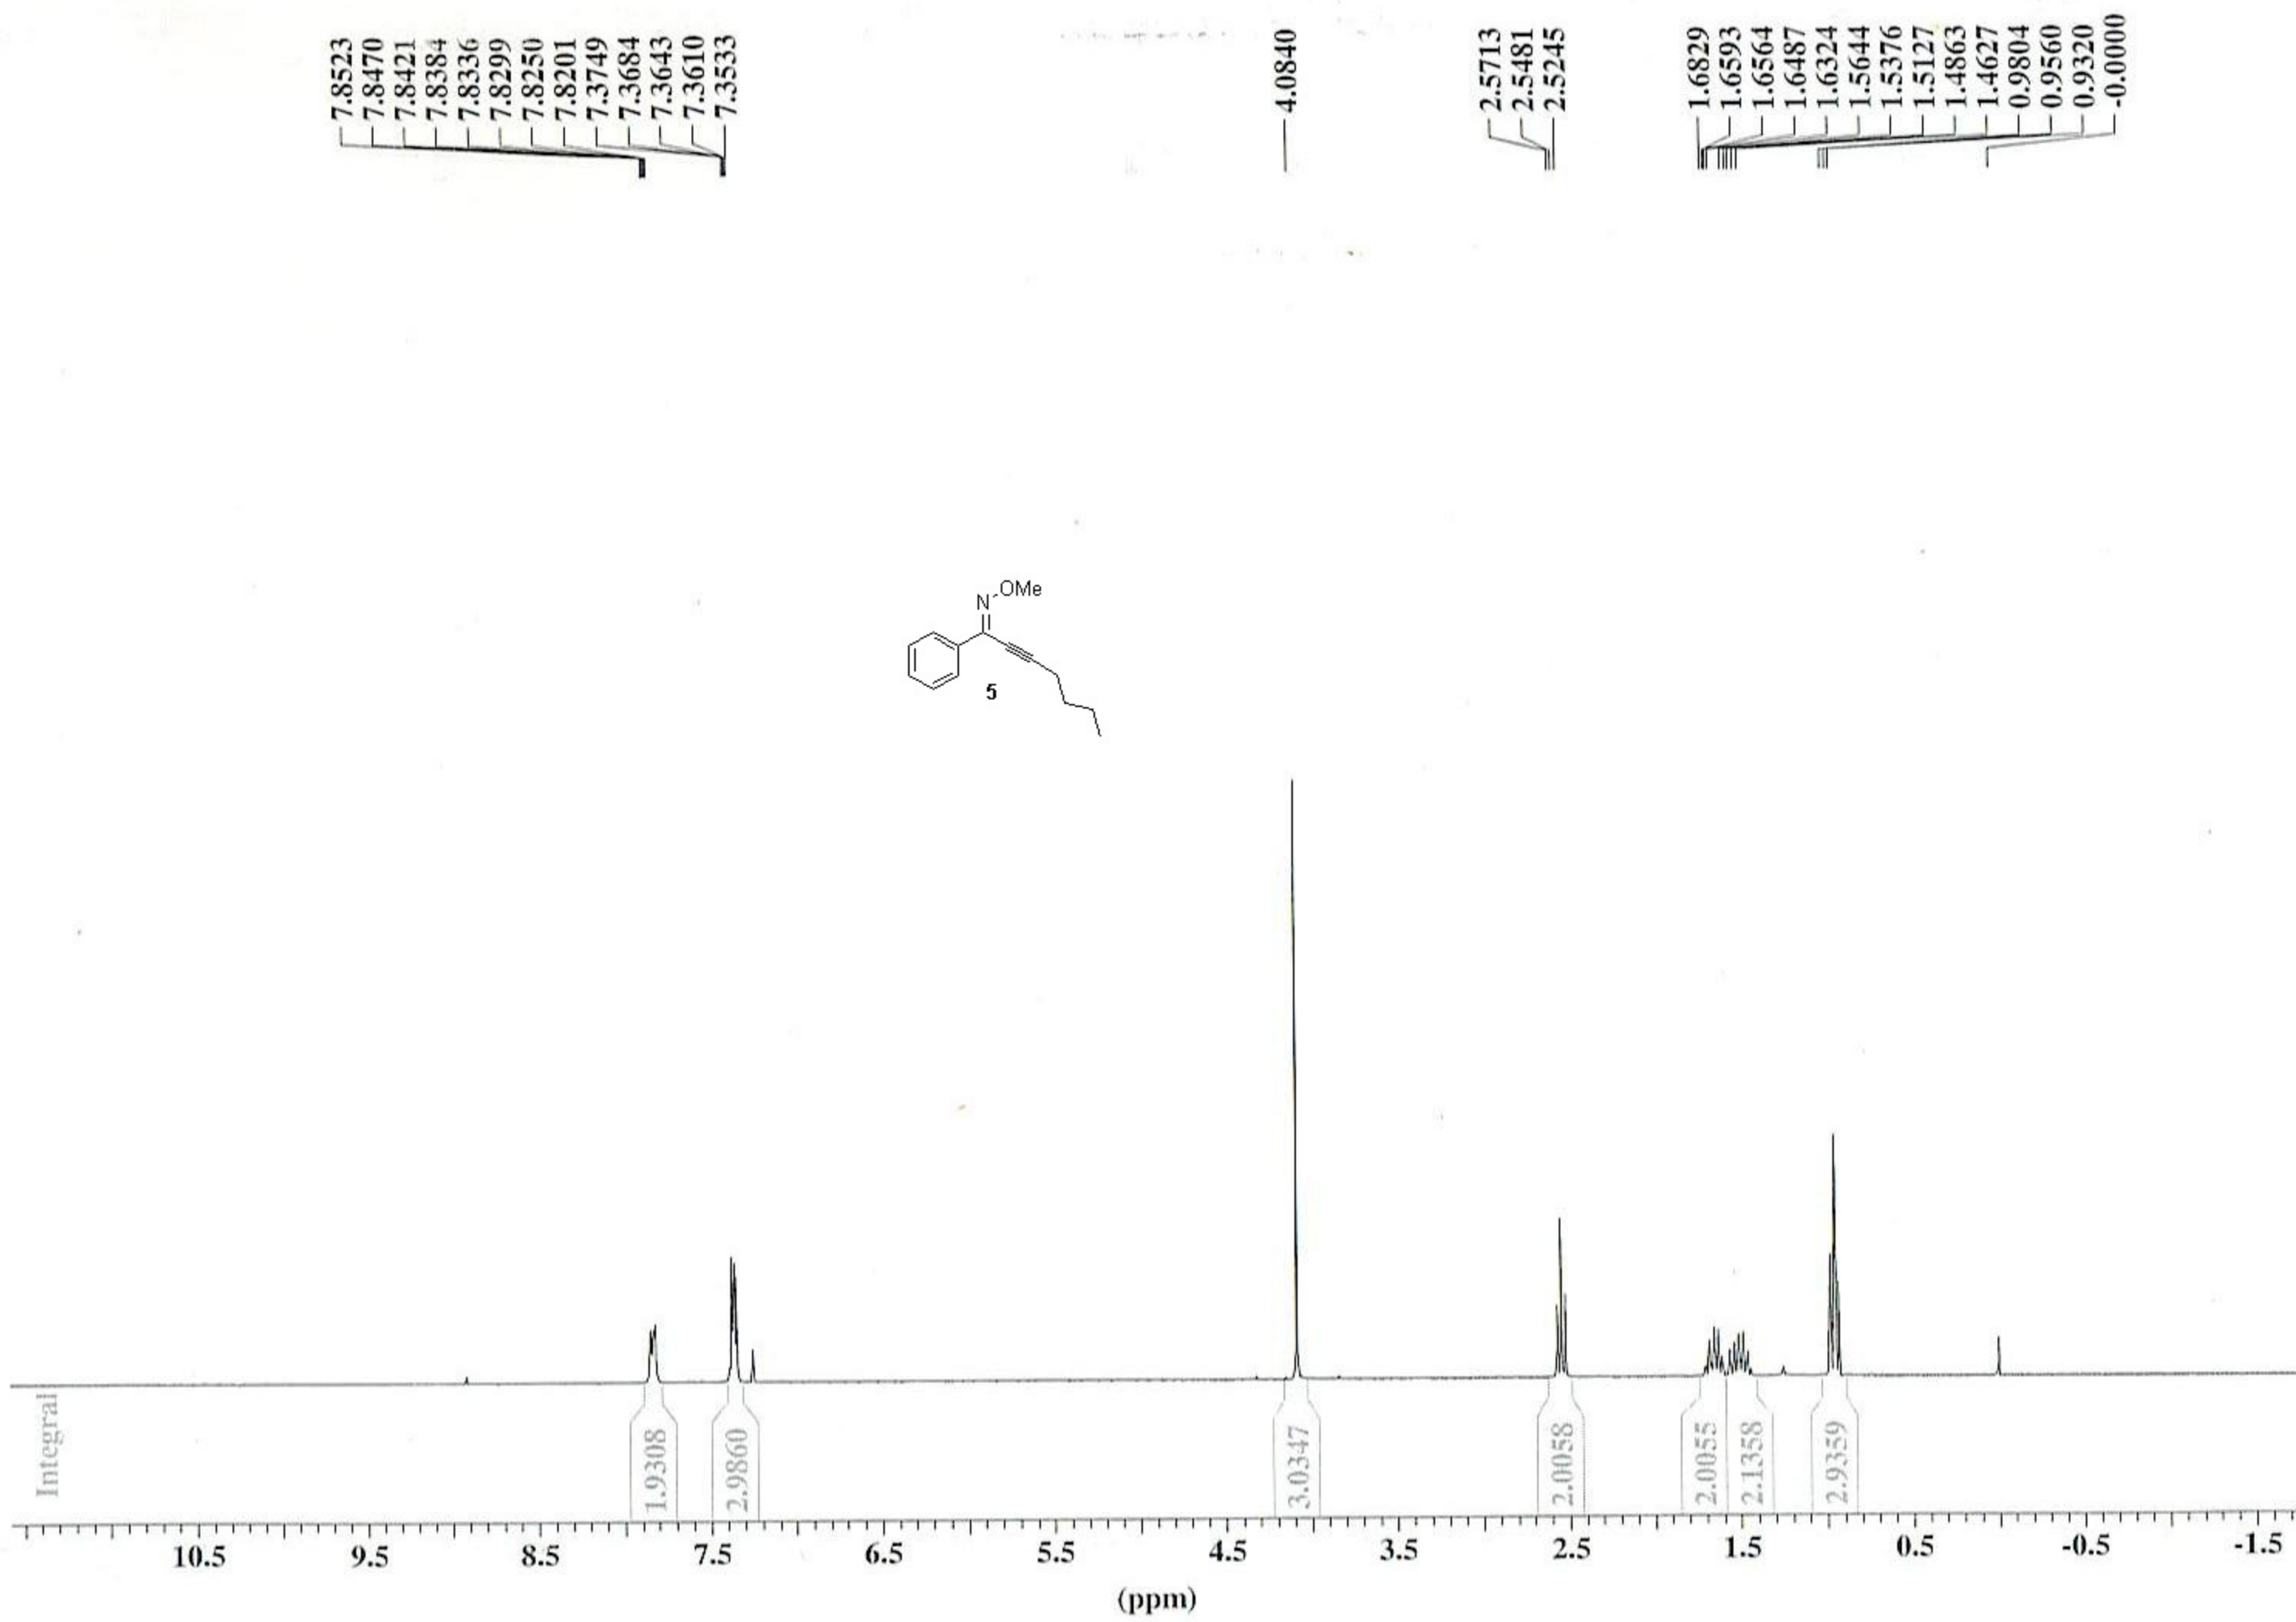

— 140.4611  
— 134.1465  
— 129.7195  
— 128.5157  
— 126.6993

— 104.1973

— 77.6886  
— 77.2648  
— 76.8410

— 71.6731

— 63.1824

— 30.6084

— 22.2992

— 19.7349

— 13.8334

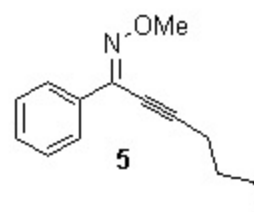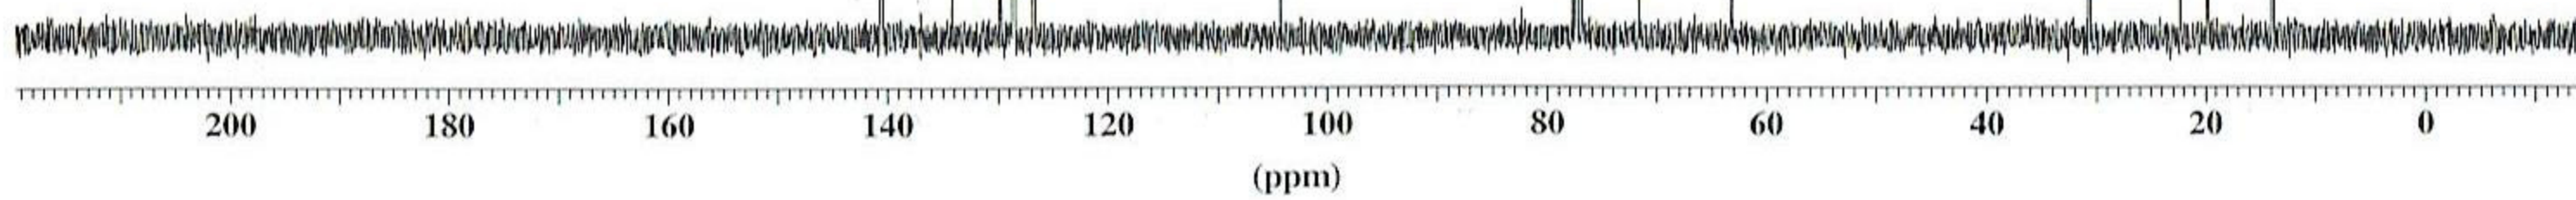

7.7741  
7.7692  
7.4933  
7.4880  
7.4827  
7.4807  
7.4779  
7.4738  
7.4713  
7.4665

2.9014  
2.8769  
2.8509

1.7976  
1.7732  
1.7663  
1.7476  
1.7398  
1.7219  
1.7154  
1.6967  
1.4651  
1.4399  
1.4147  
1.3902  
0.9959  
0.9715  
0.9470  
0.0000

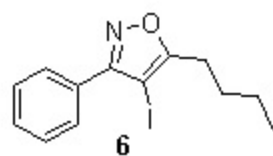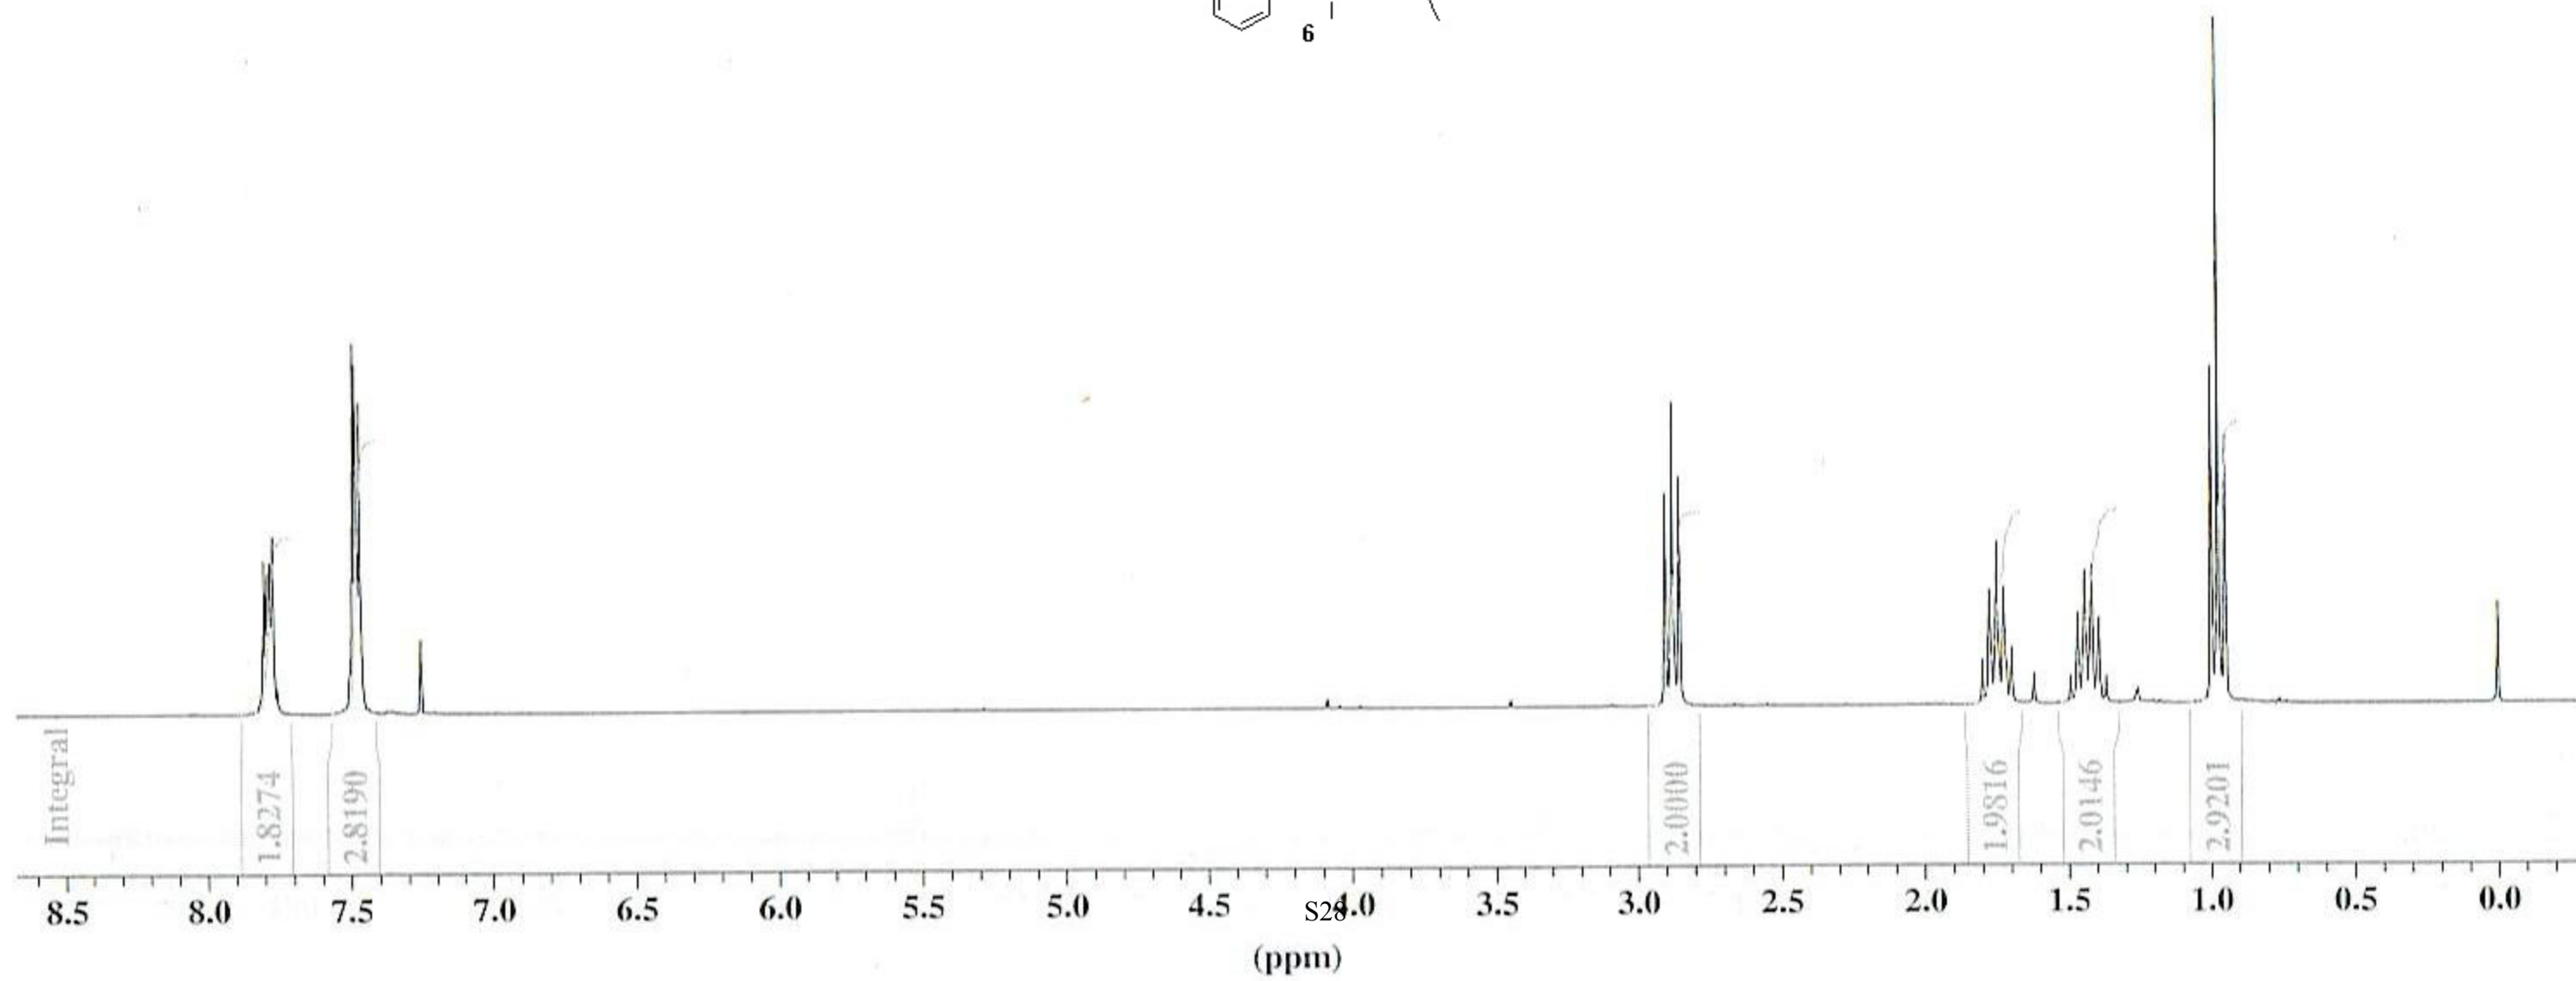

— 174.9806

— 162.8606

130.1192

129.0008

128.7266

128.7088

77.6538

77.2300

76.8062

— 57.5168

— 29.4802

— 27.0654

— 22.4140

— 13.8912

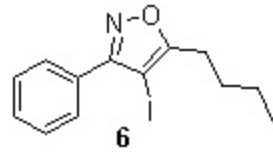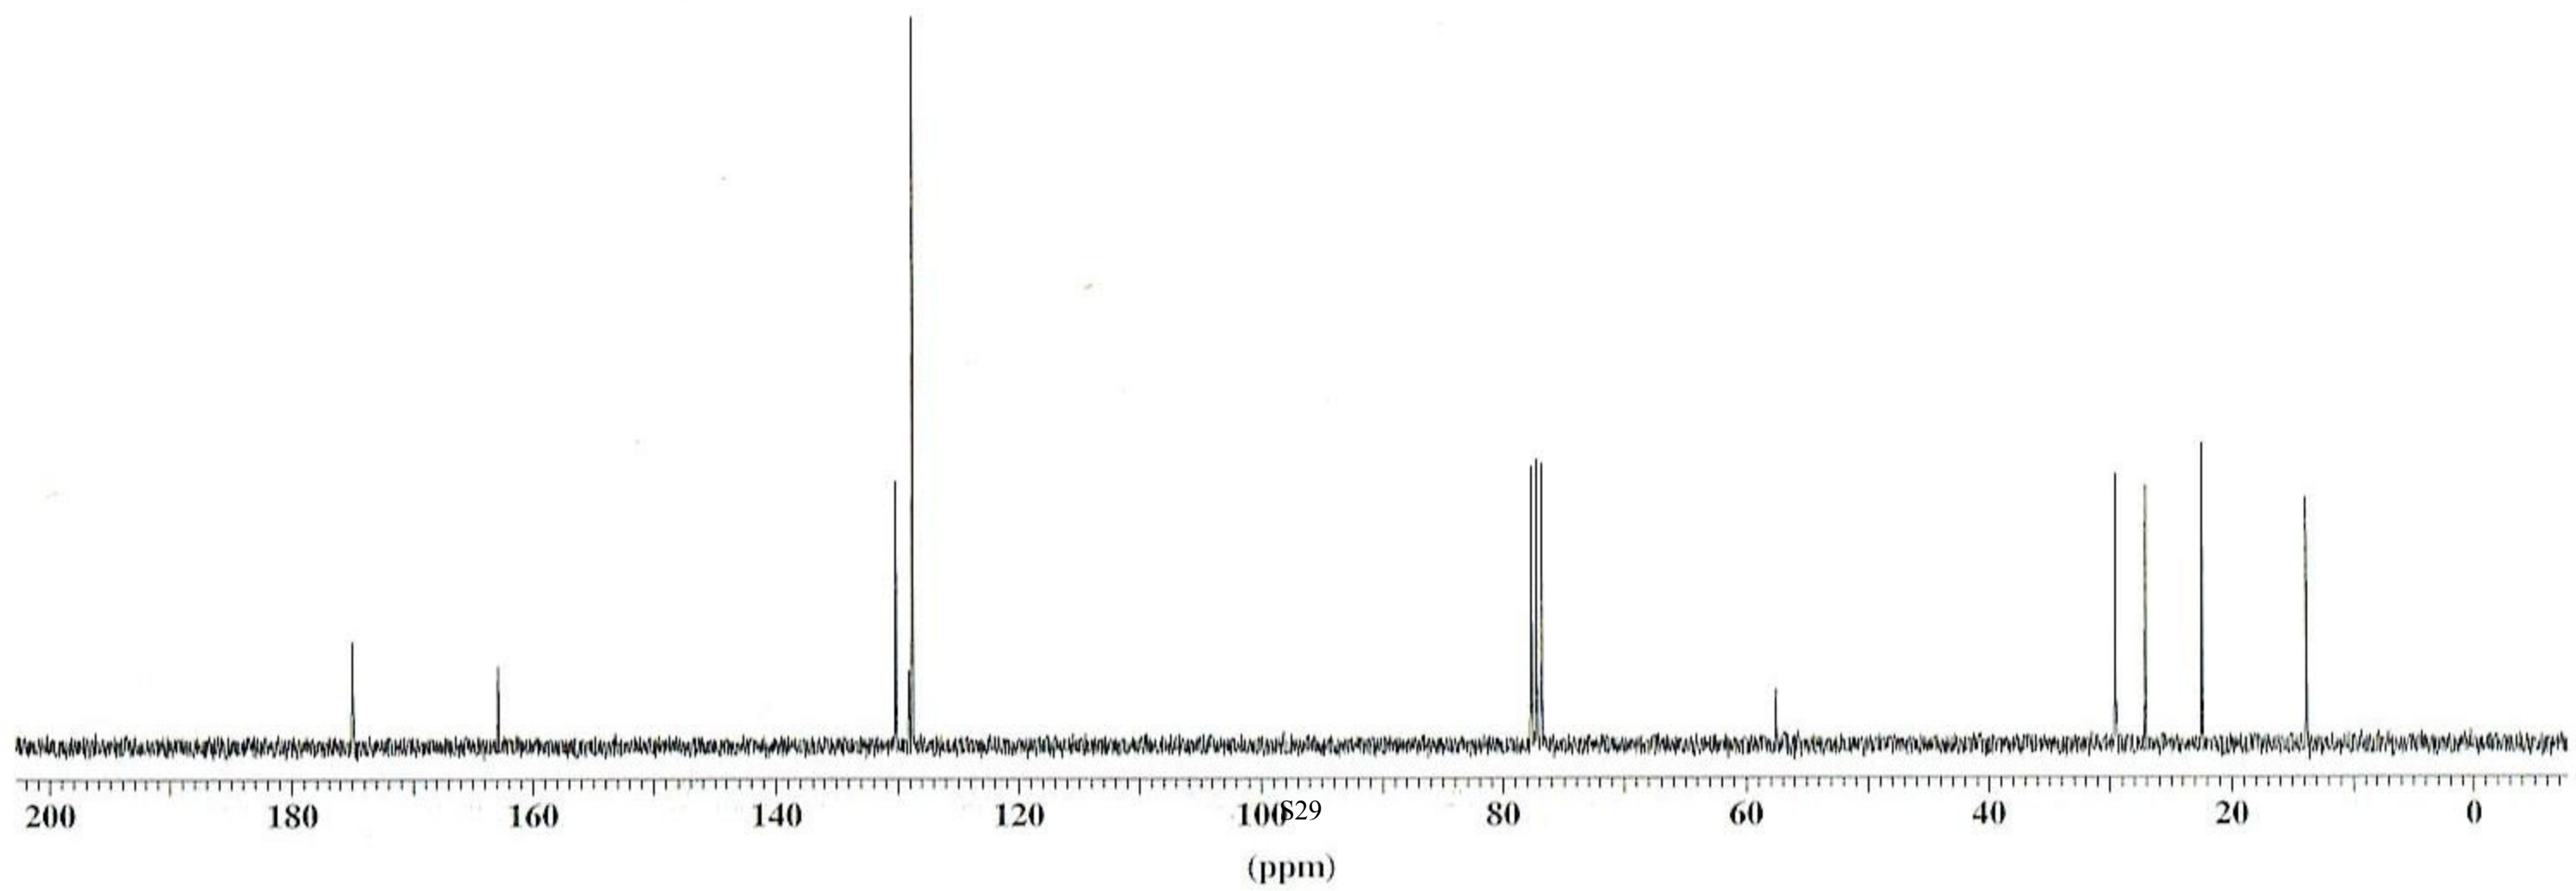

8.0672  
8.0655  
8.0383  
7.9052  
7.8942  
7.8852  
7.6826  
7.6813  
7.6557  
7.6537  
7.4148  
7.4107  
7.4078  
7.4026  
7.3981  
7.3928  
7.3887

4.4251  
4.4015  
4.3775  
4.3539  
4.1483

1.4252  
1.4016  
1.3776

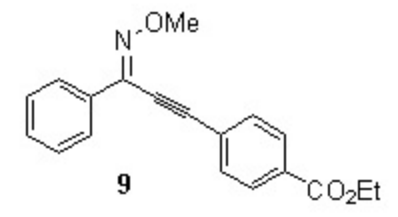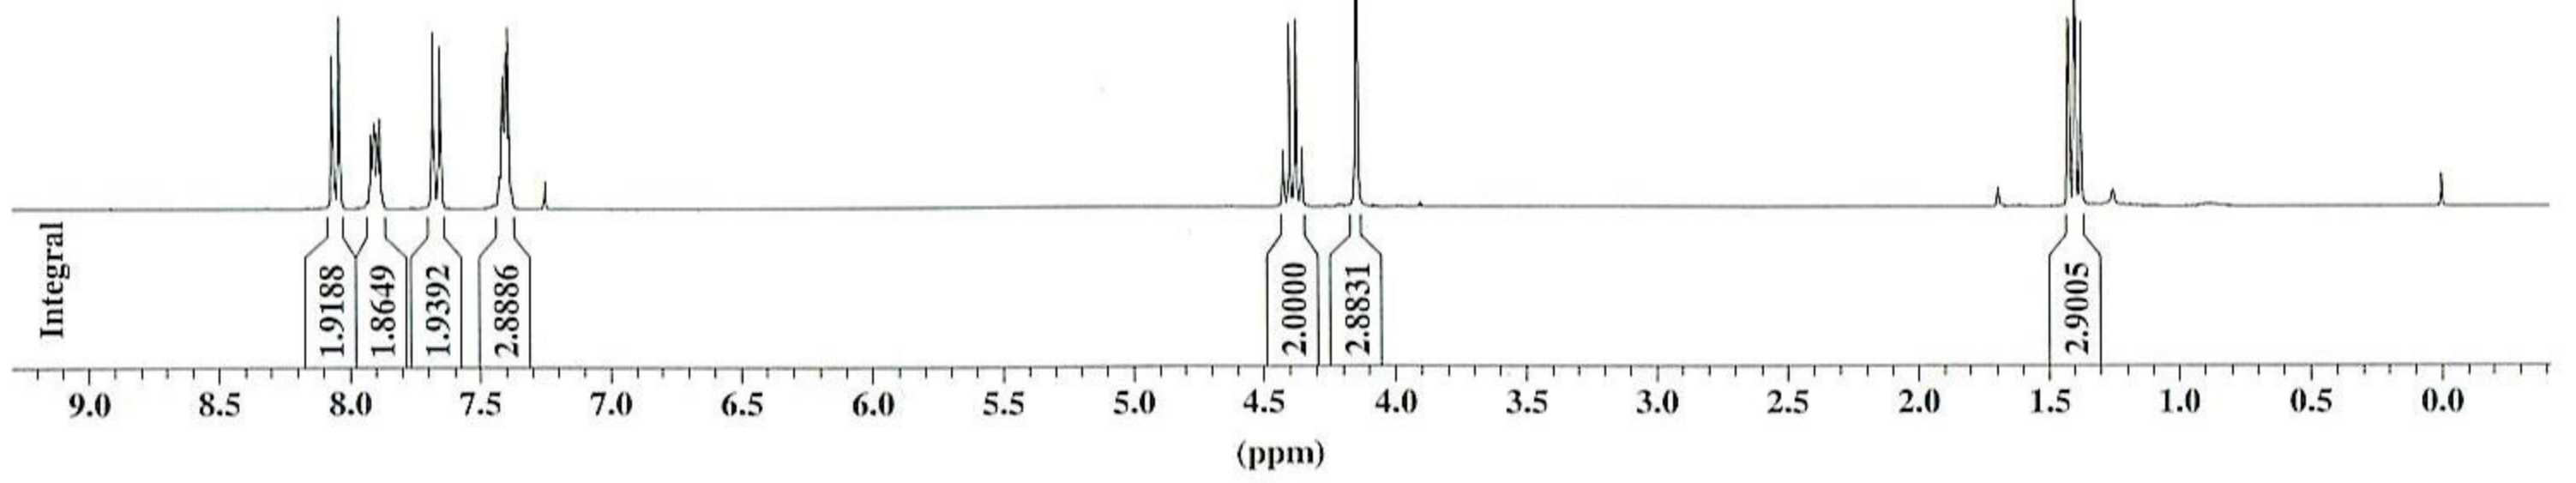

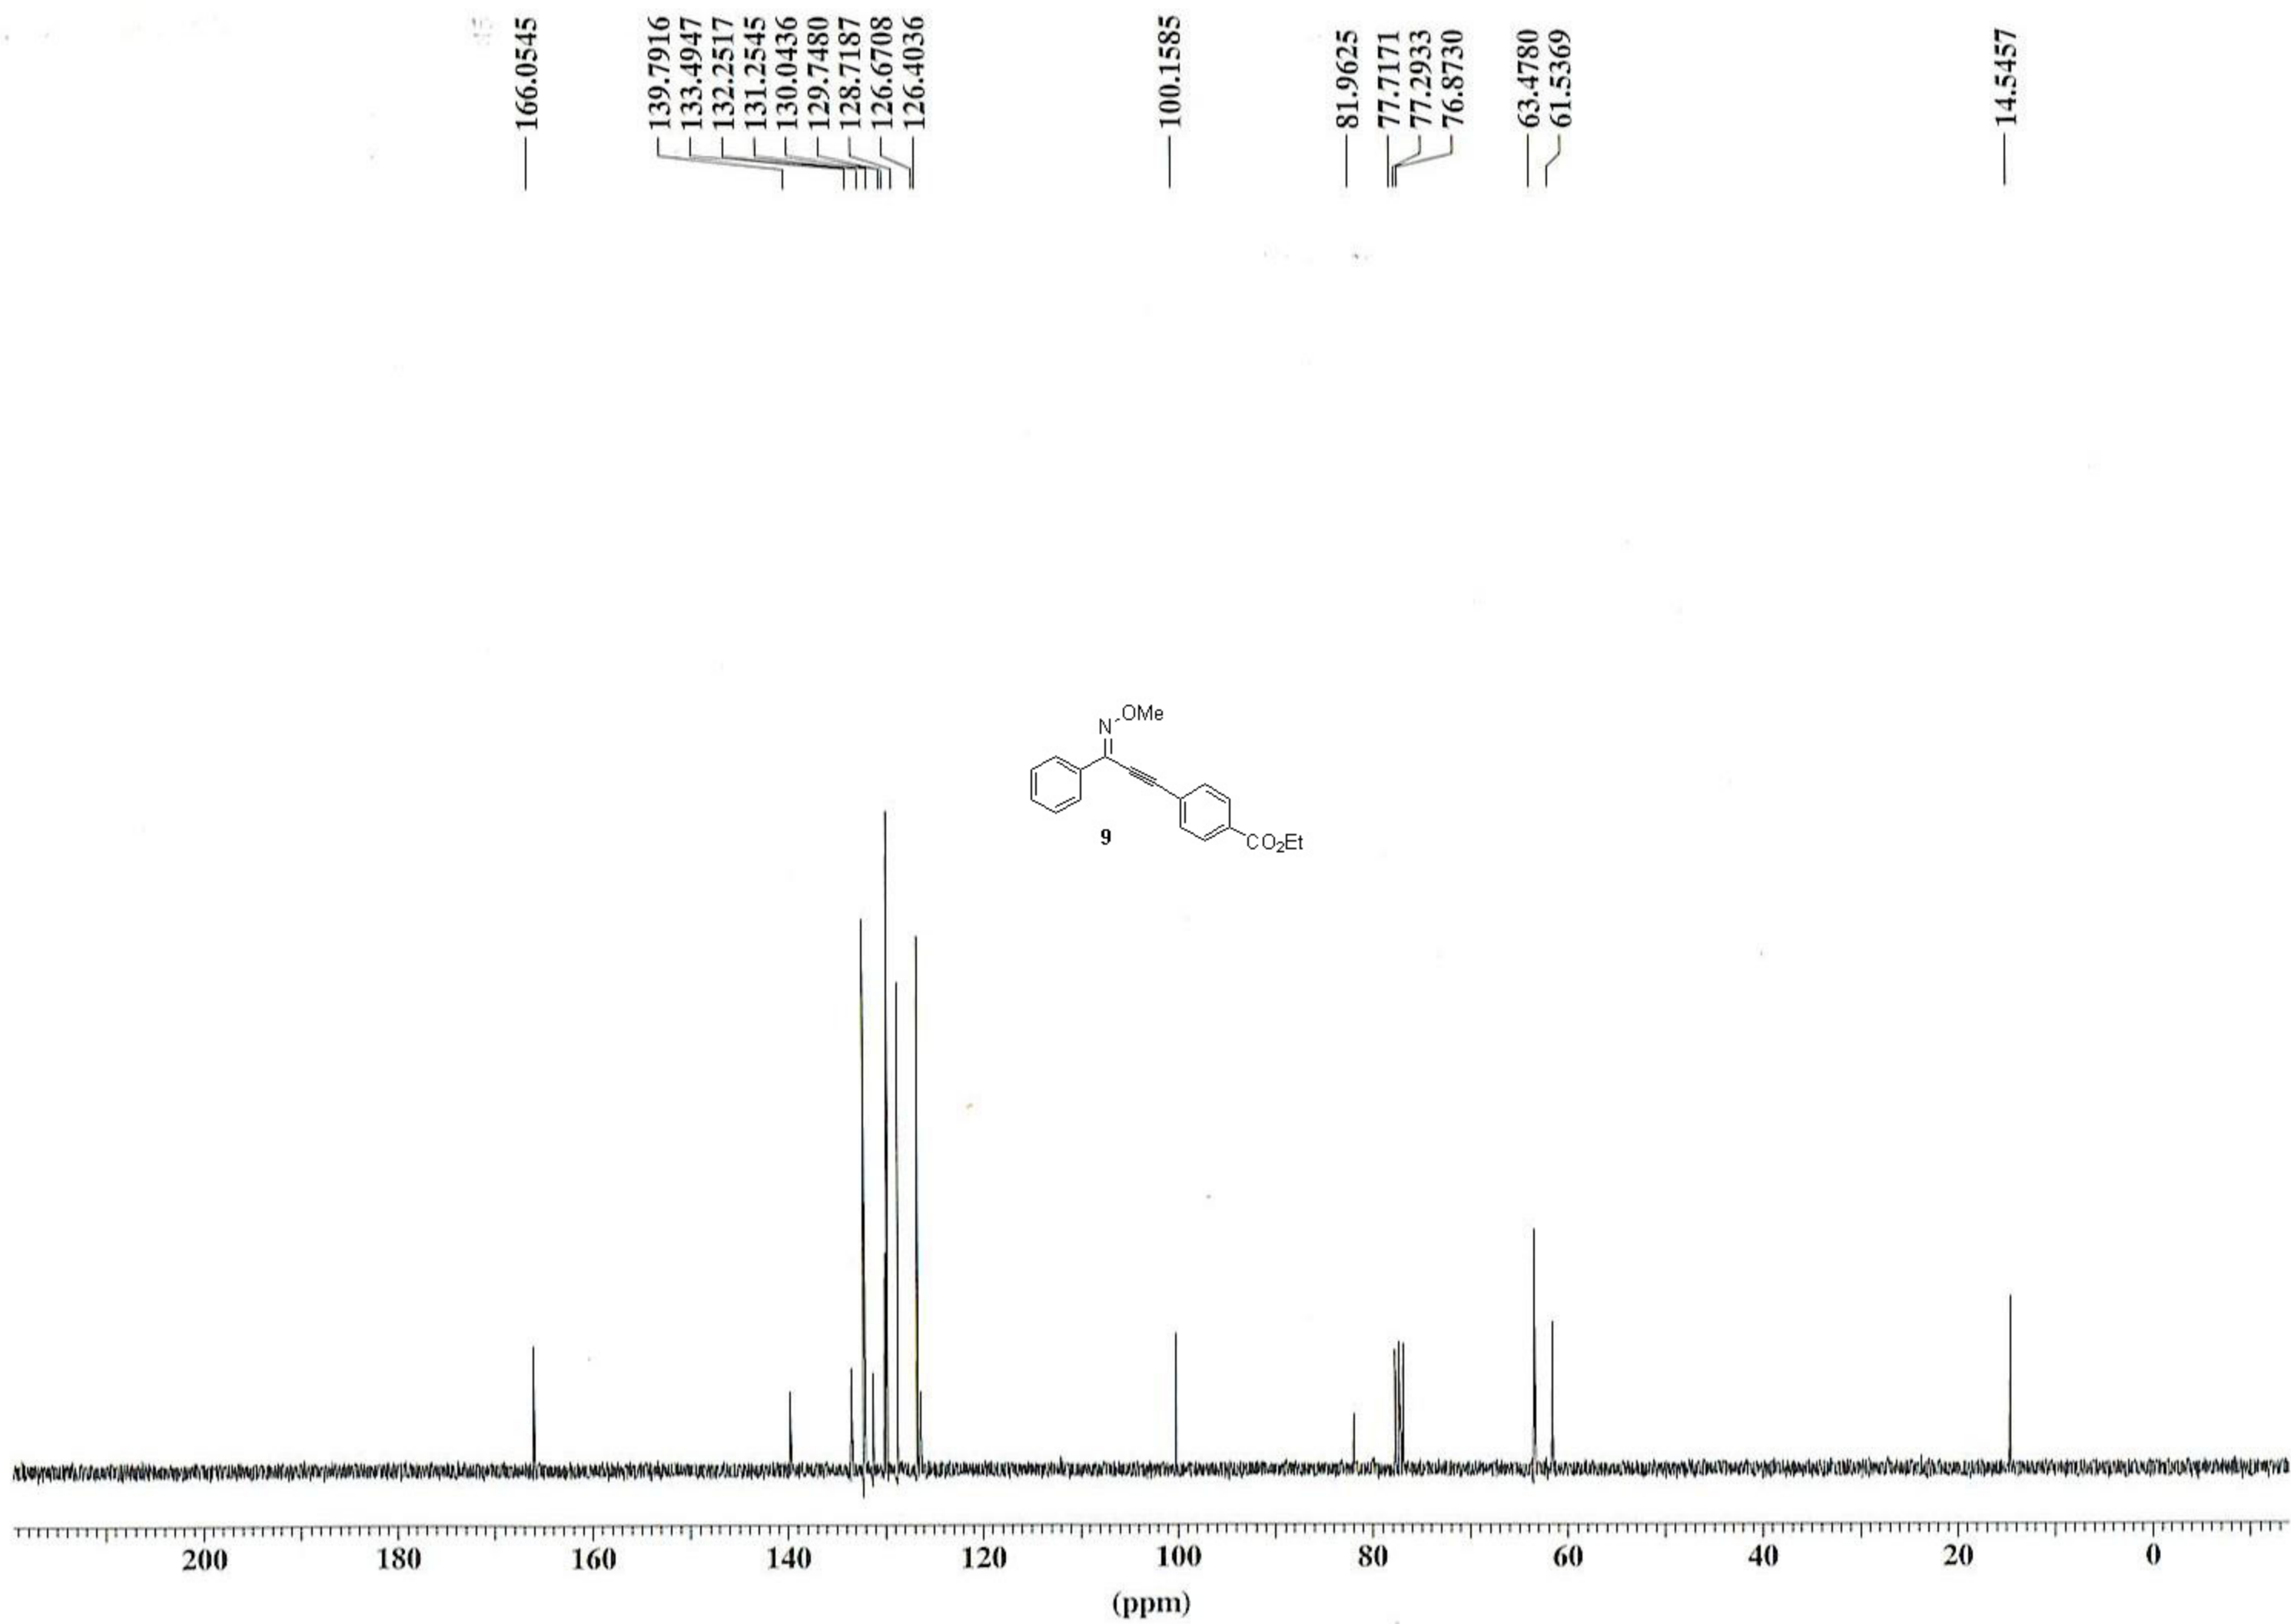

8.2226  
8.1925  
8.1856  
8.1559  
7.7977  
7.7896  
7.7778  
7.7656  
7.5377  
7.5283  
7.5153  
— 7.2597

4.4621  
4.4385  
4.4145  
4.3909

1.4521  
1.4285  
1.4045

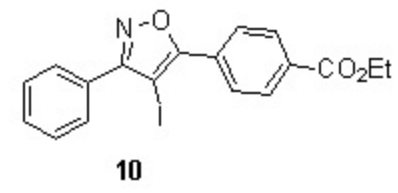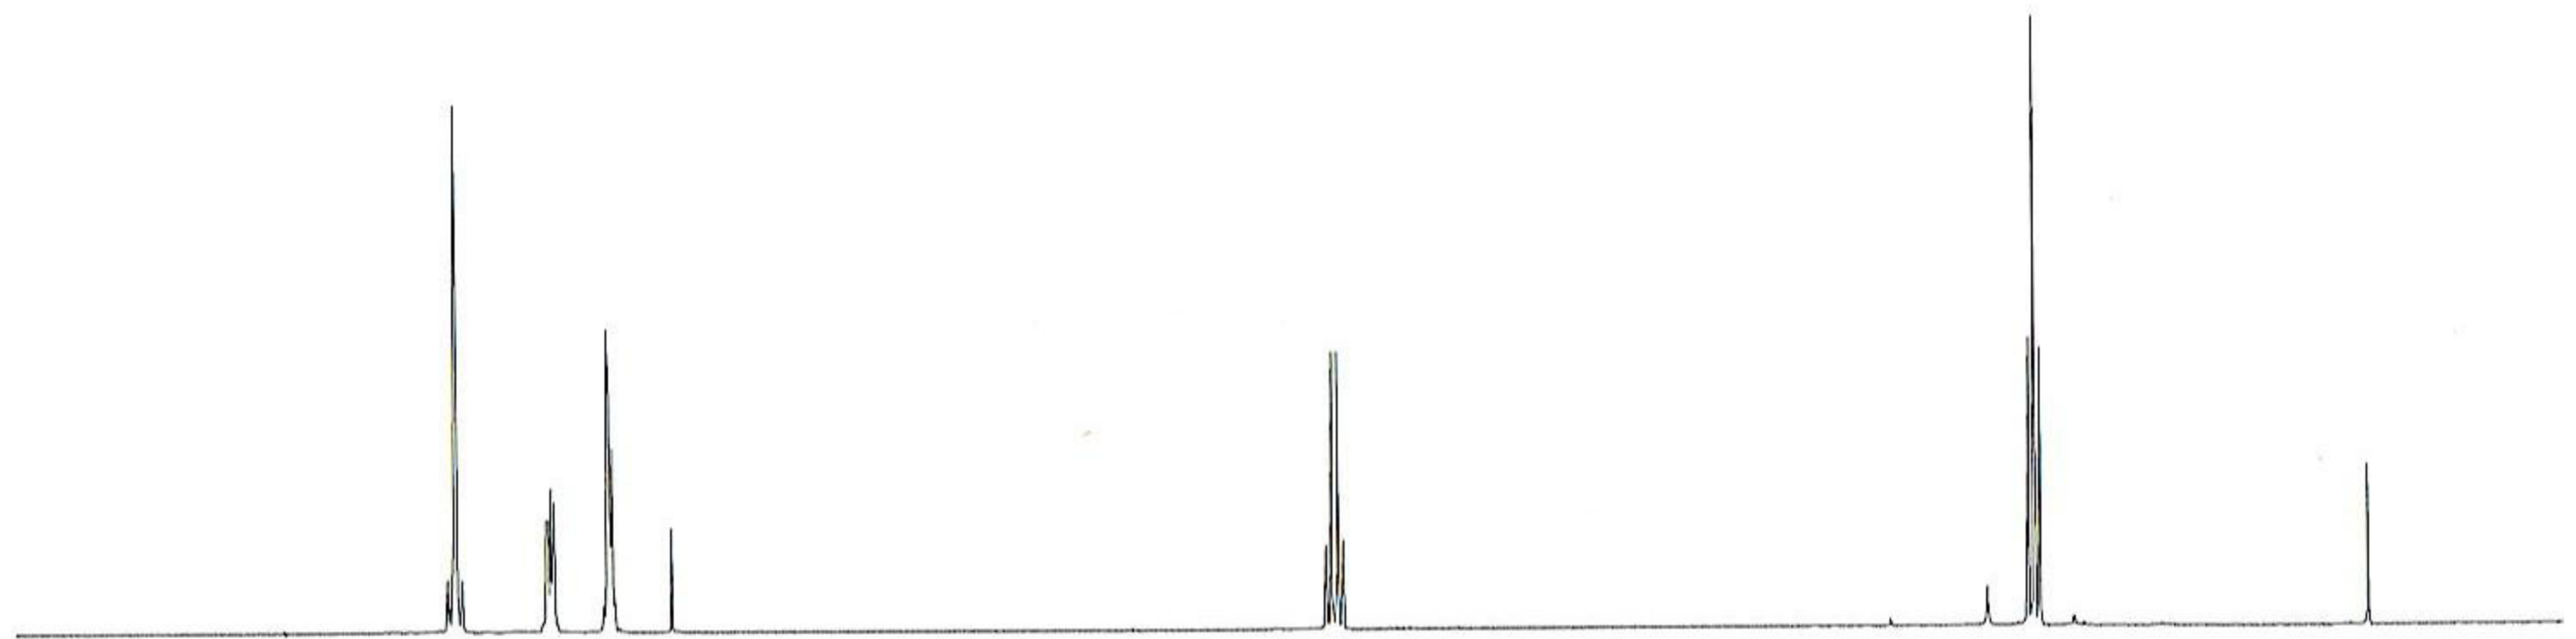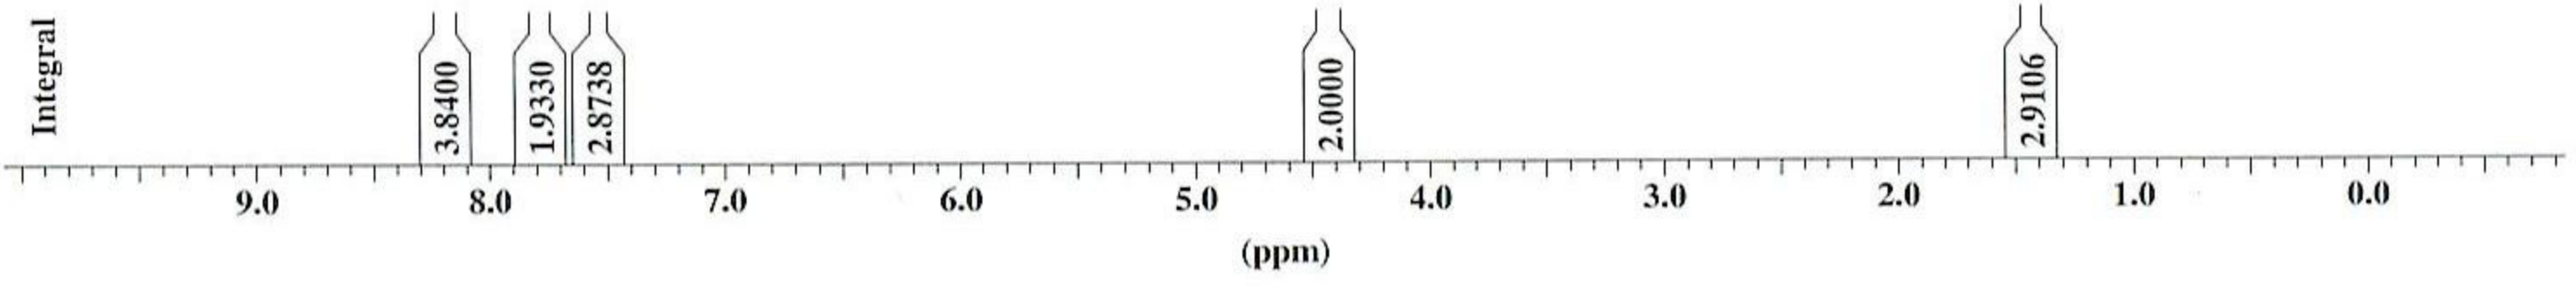



168.0240  
165.9800  
165.2609

132.4084  
131.2474  
130.4389  
130.1290  
129.2422  
128.8362  
128.6724  
127.8105

77.7029  
77.2790  
76.8552

61.6331  
57.8151

14.5742

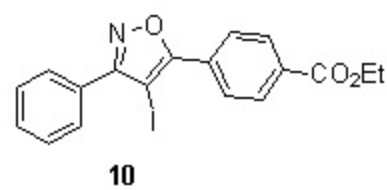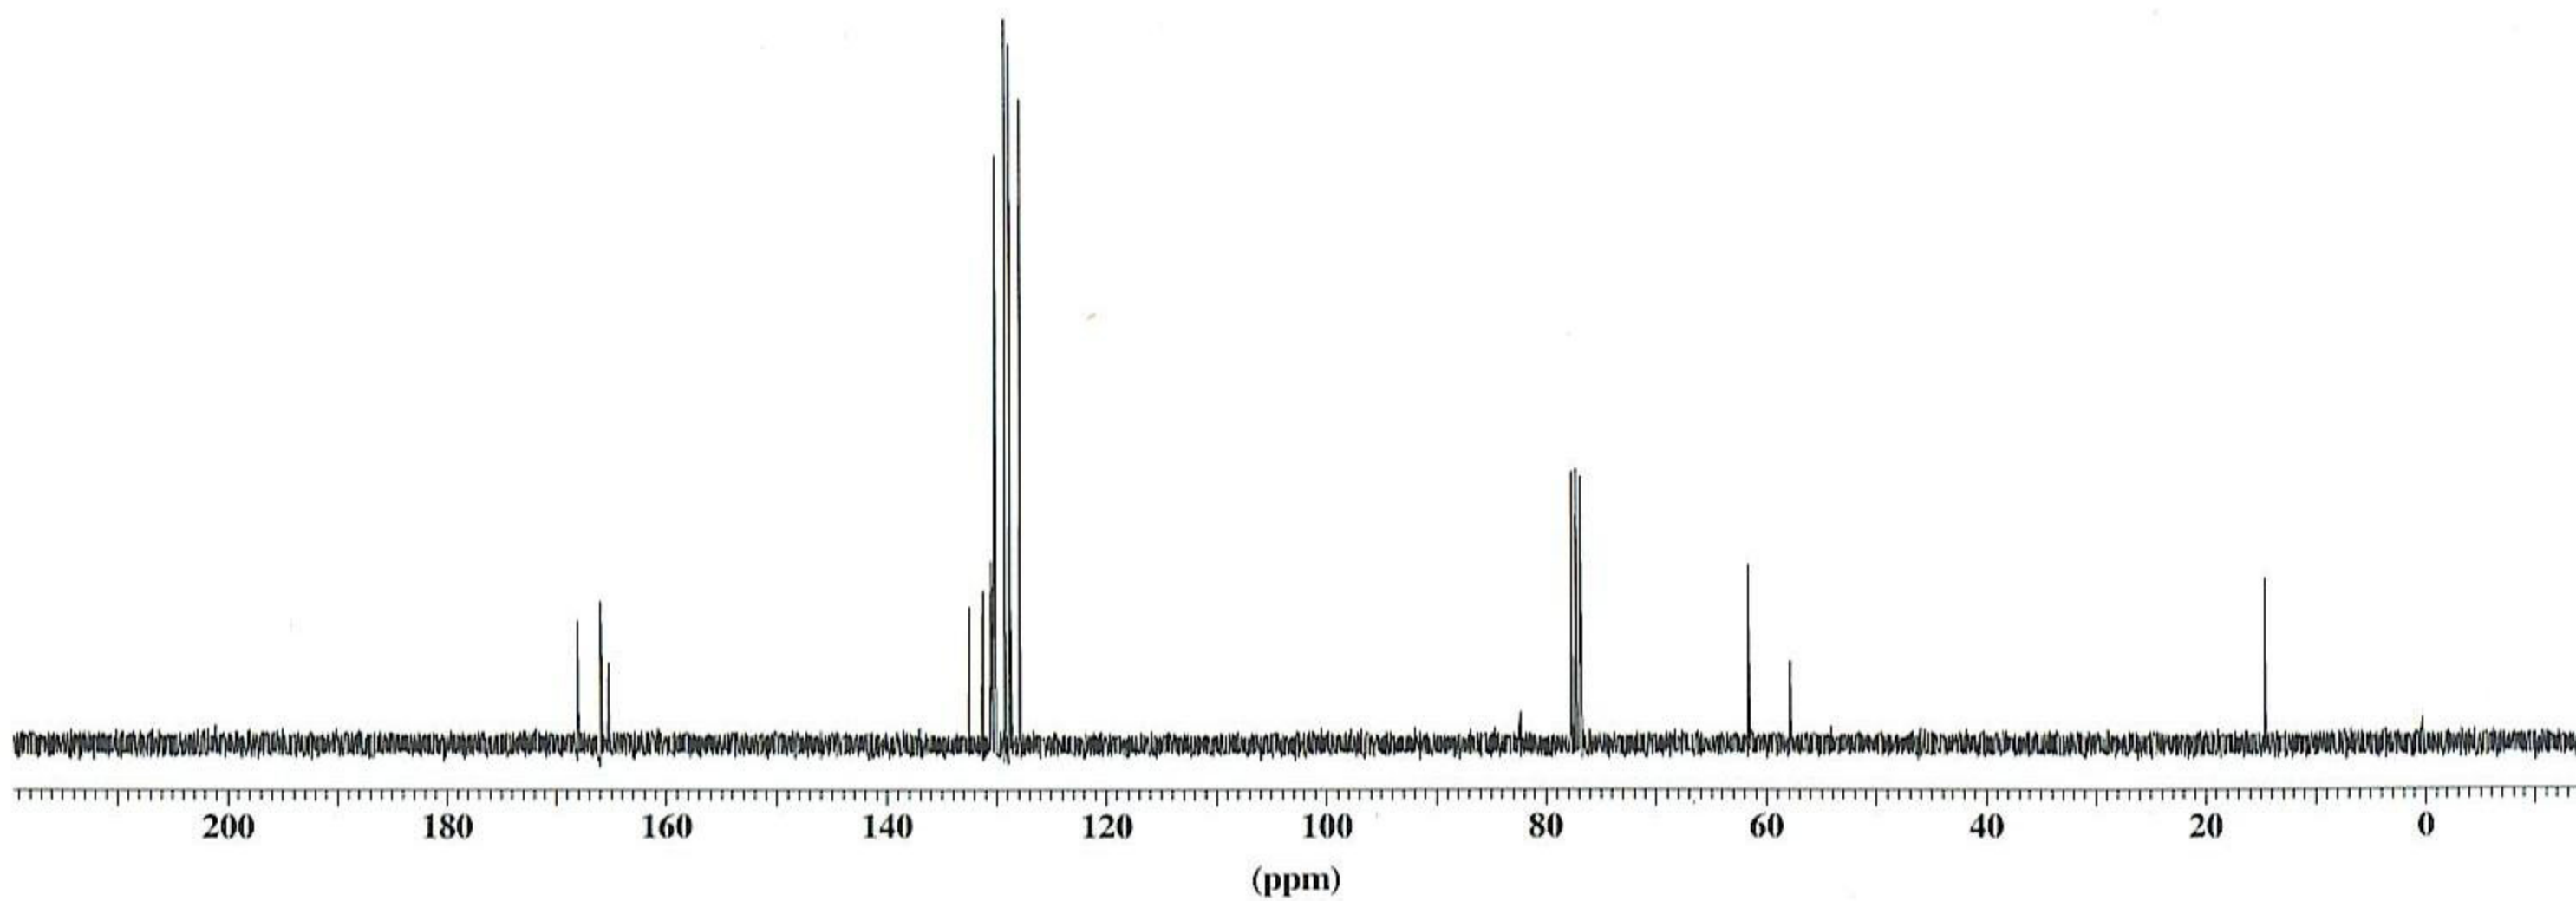

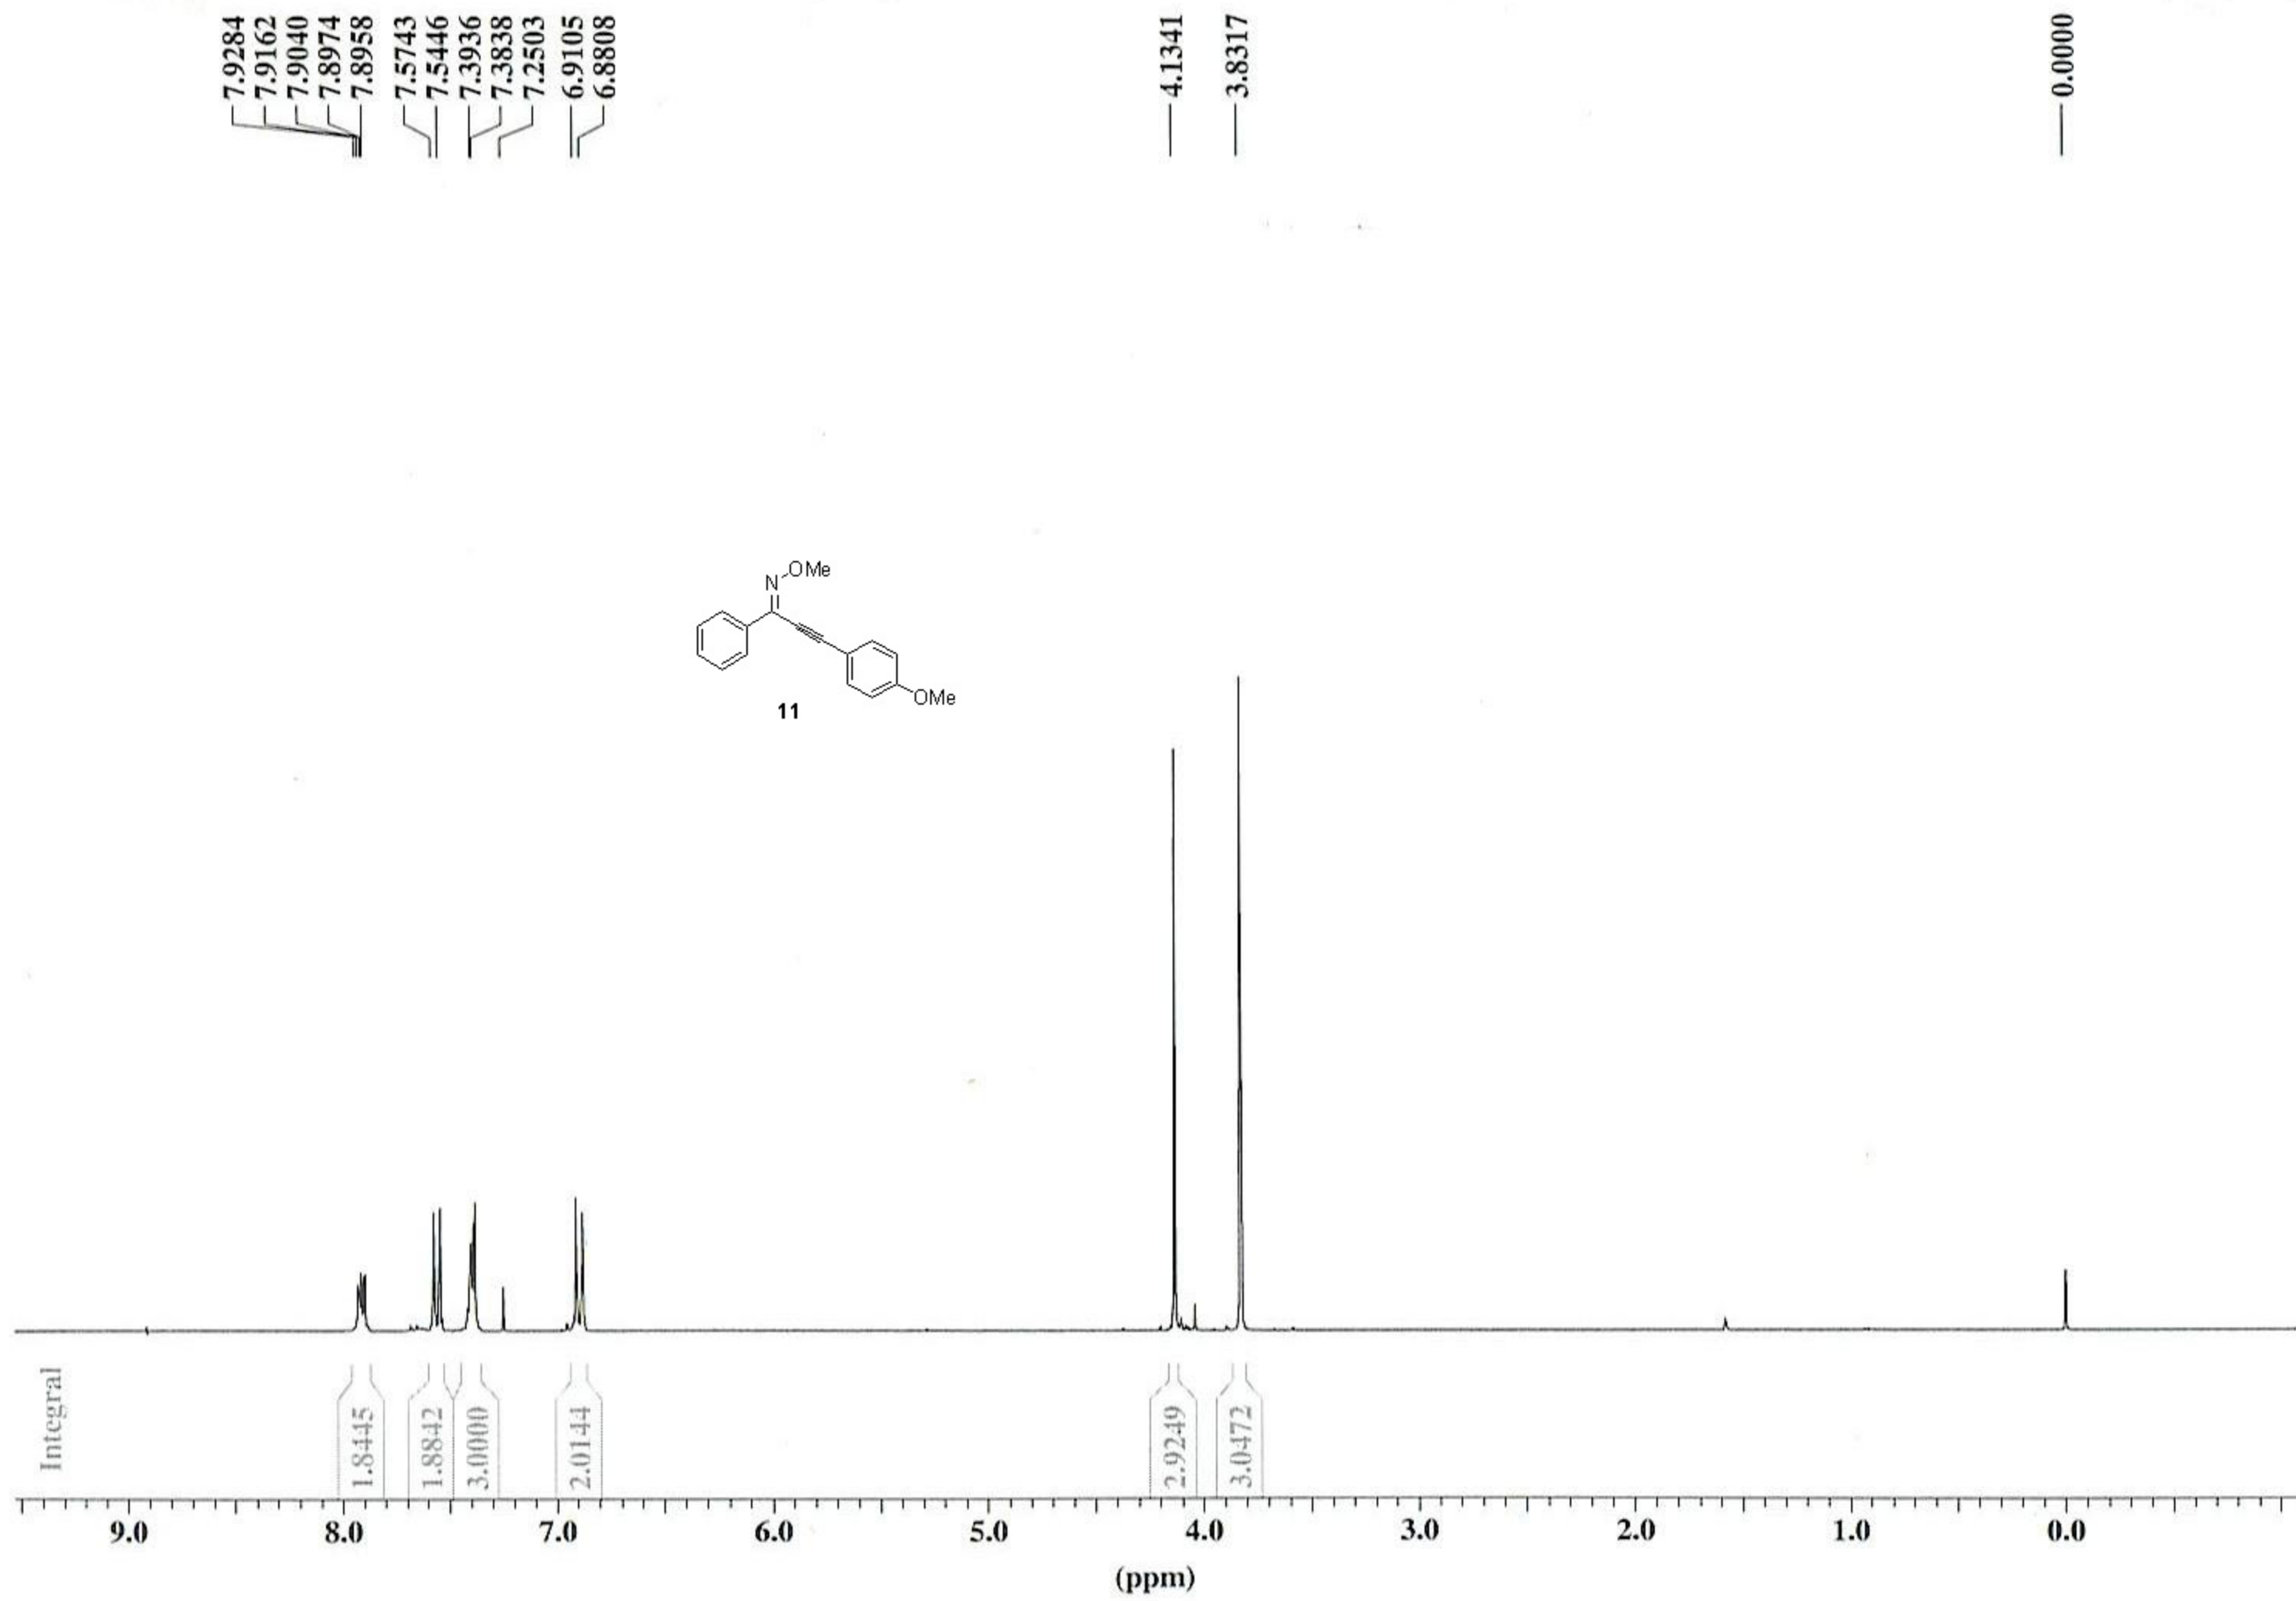

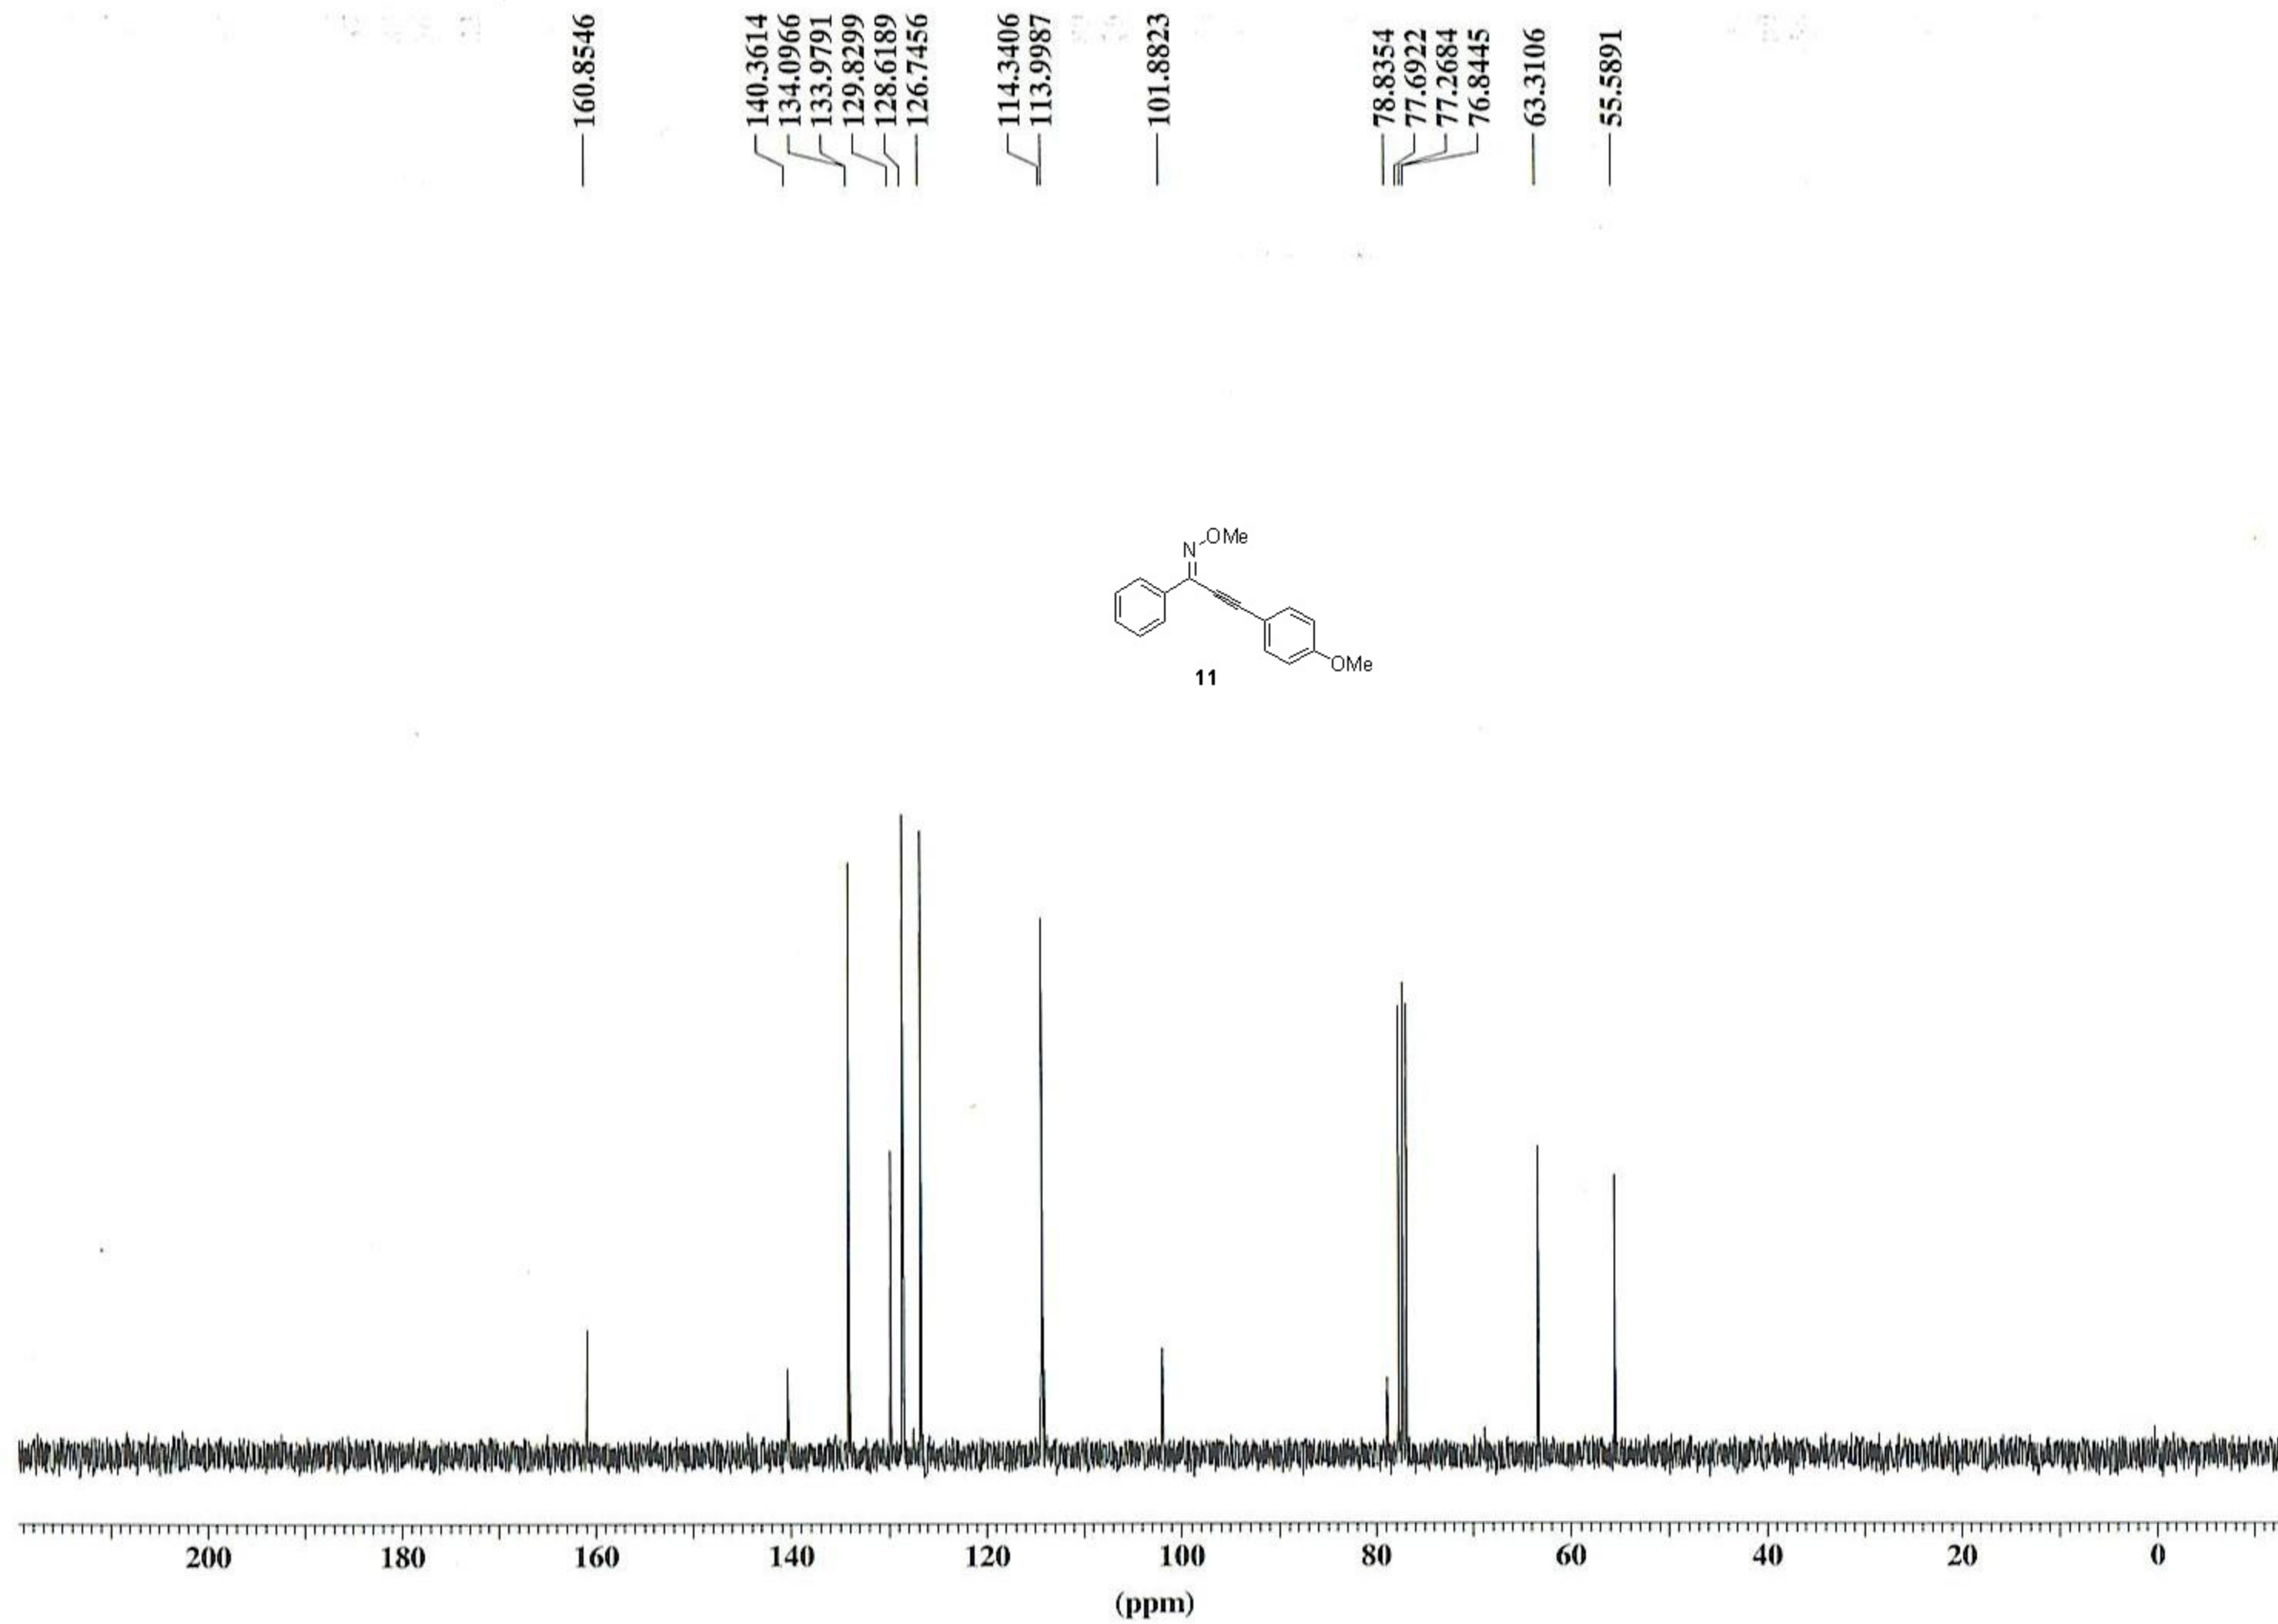

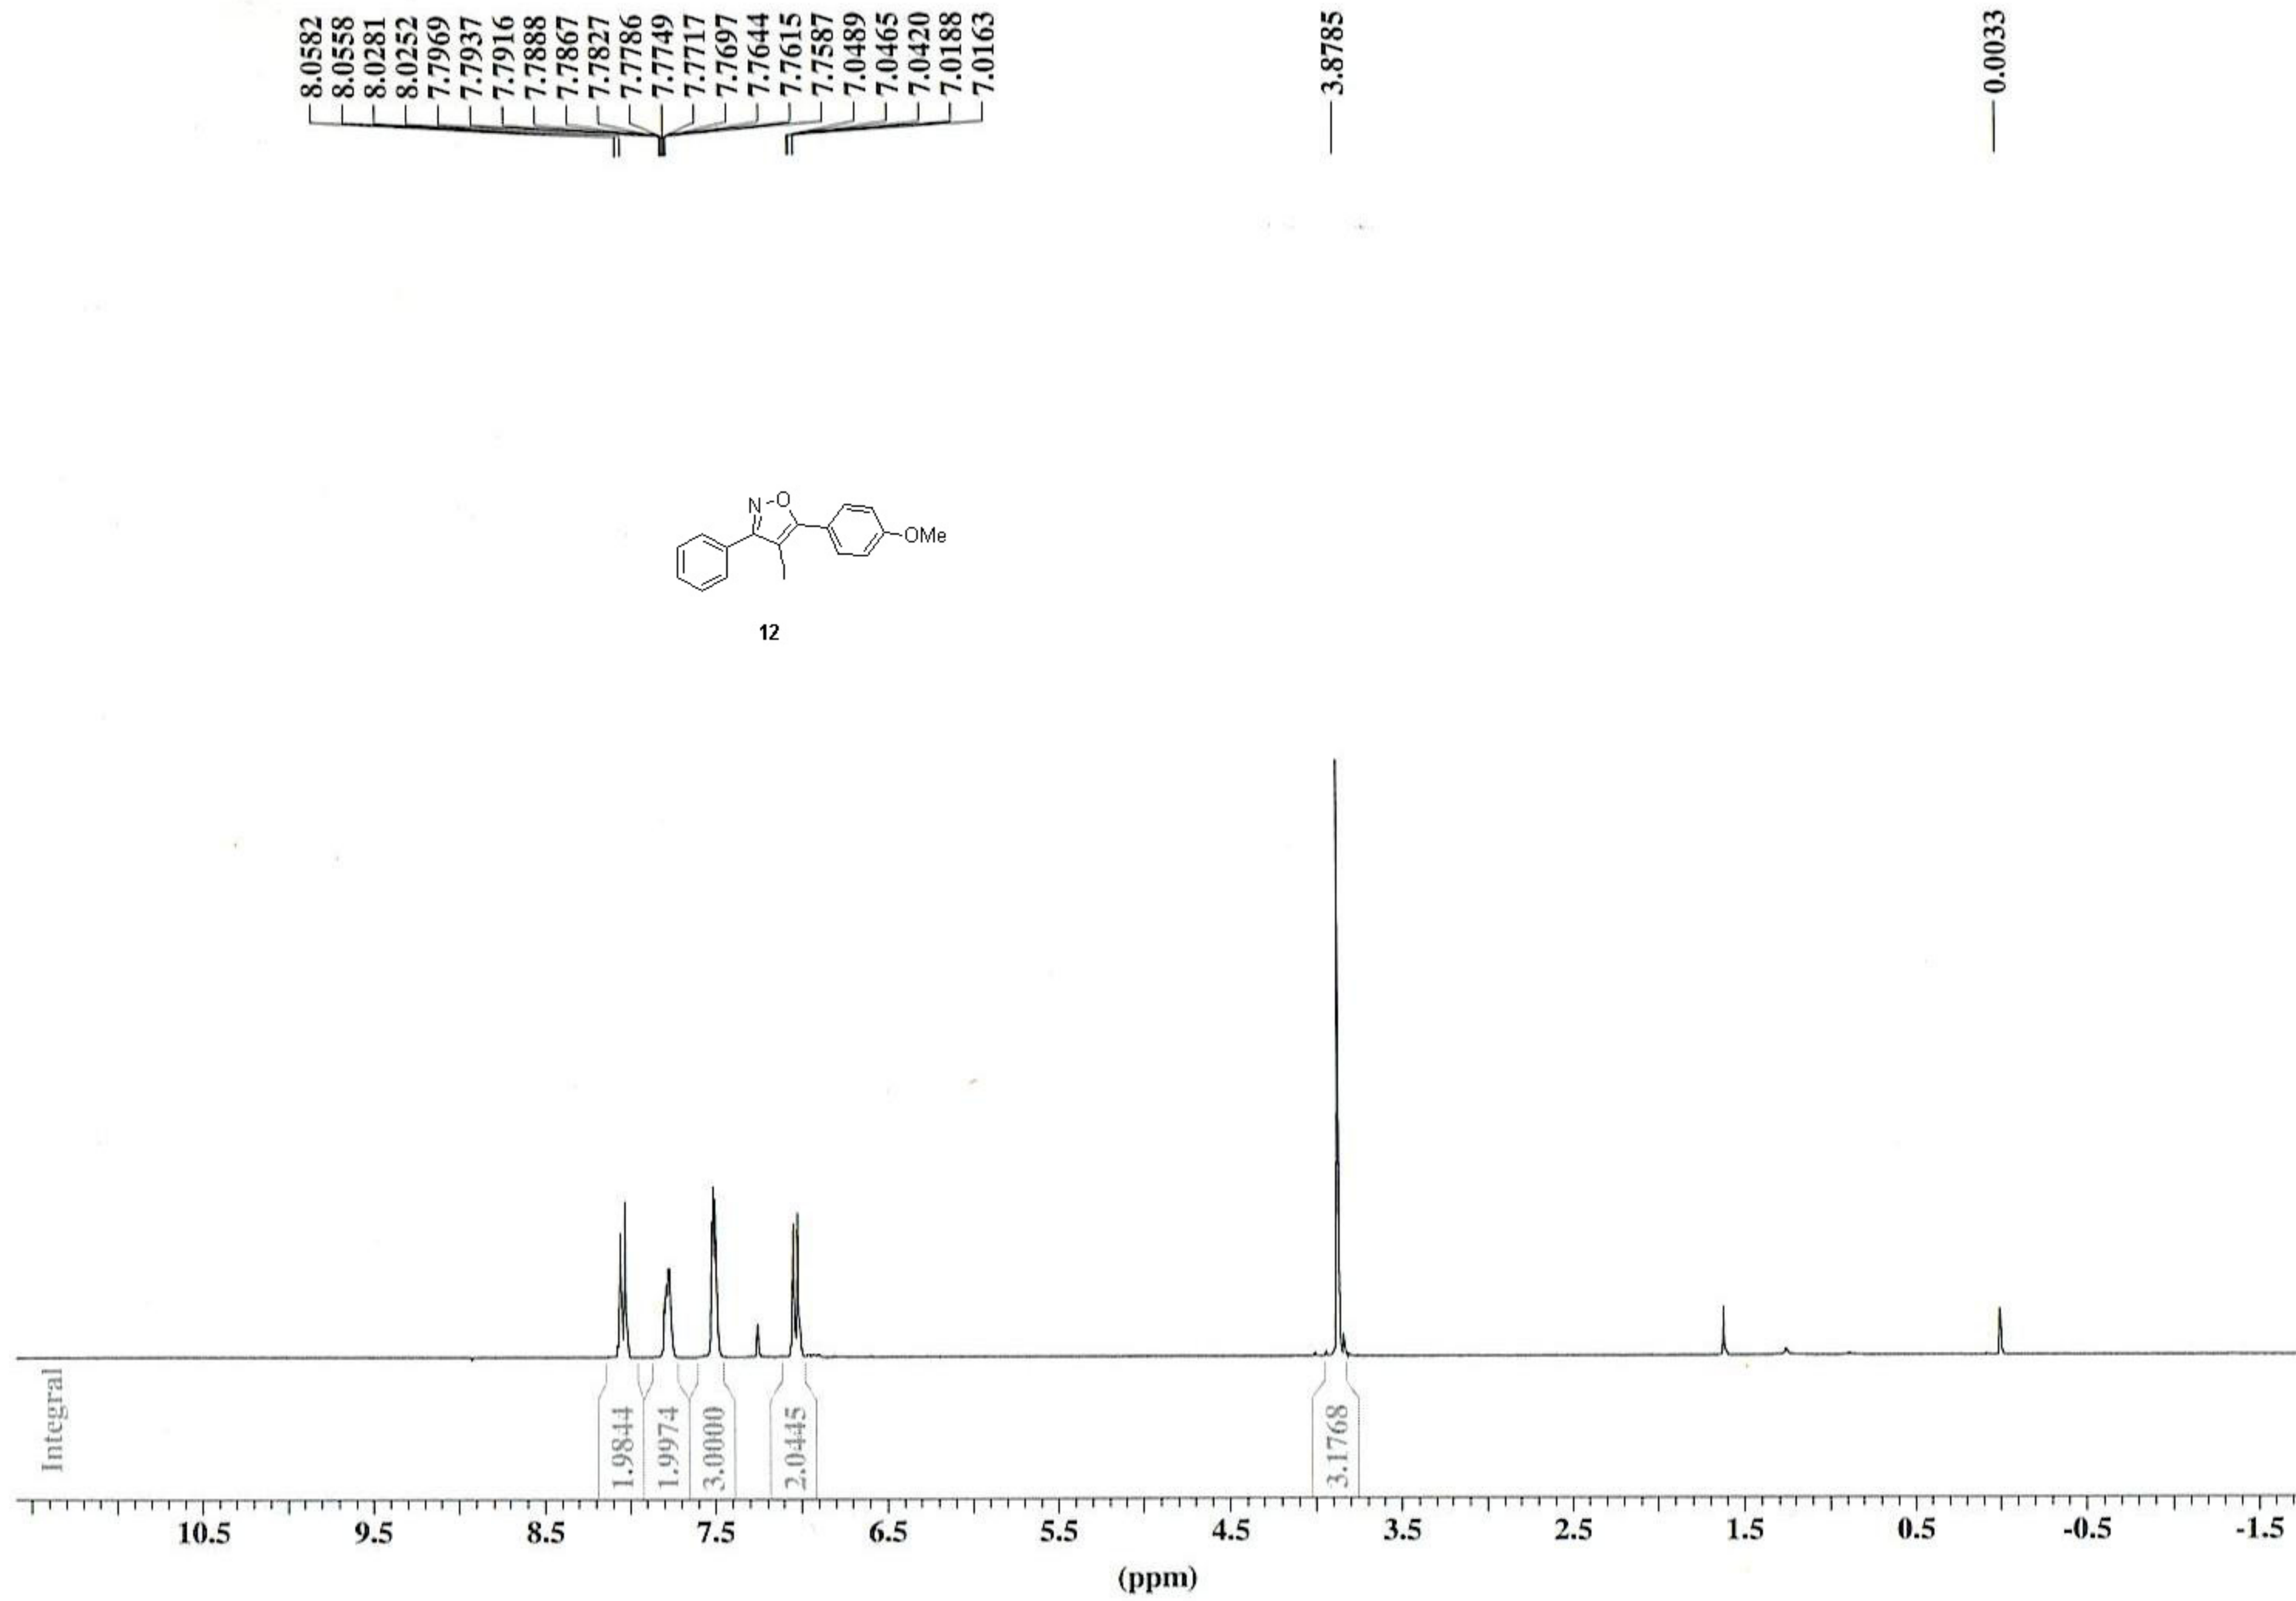

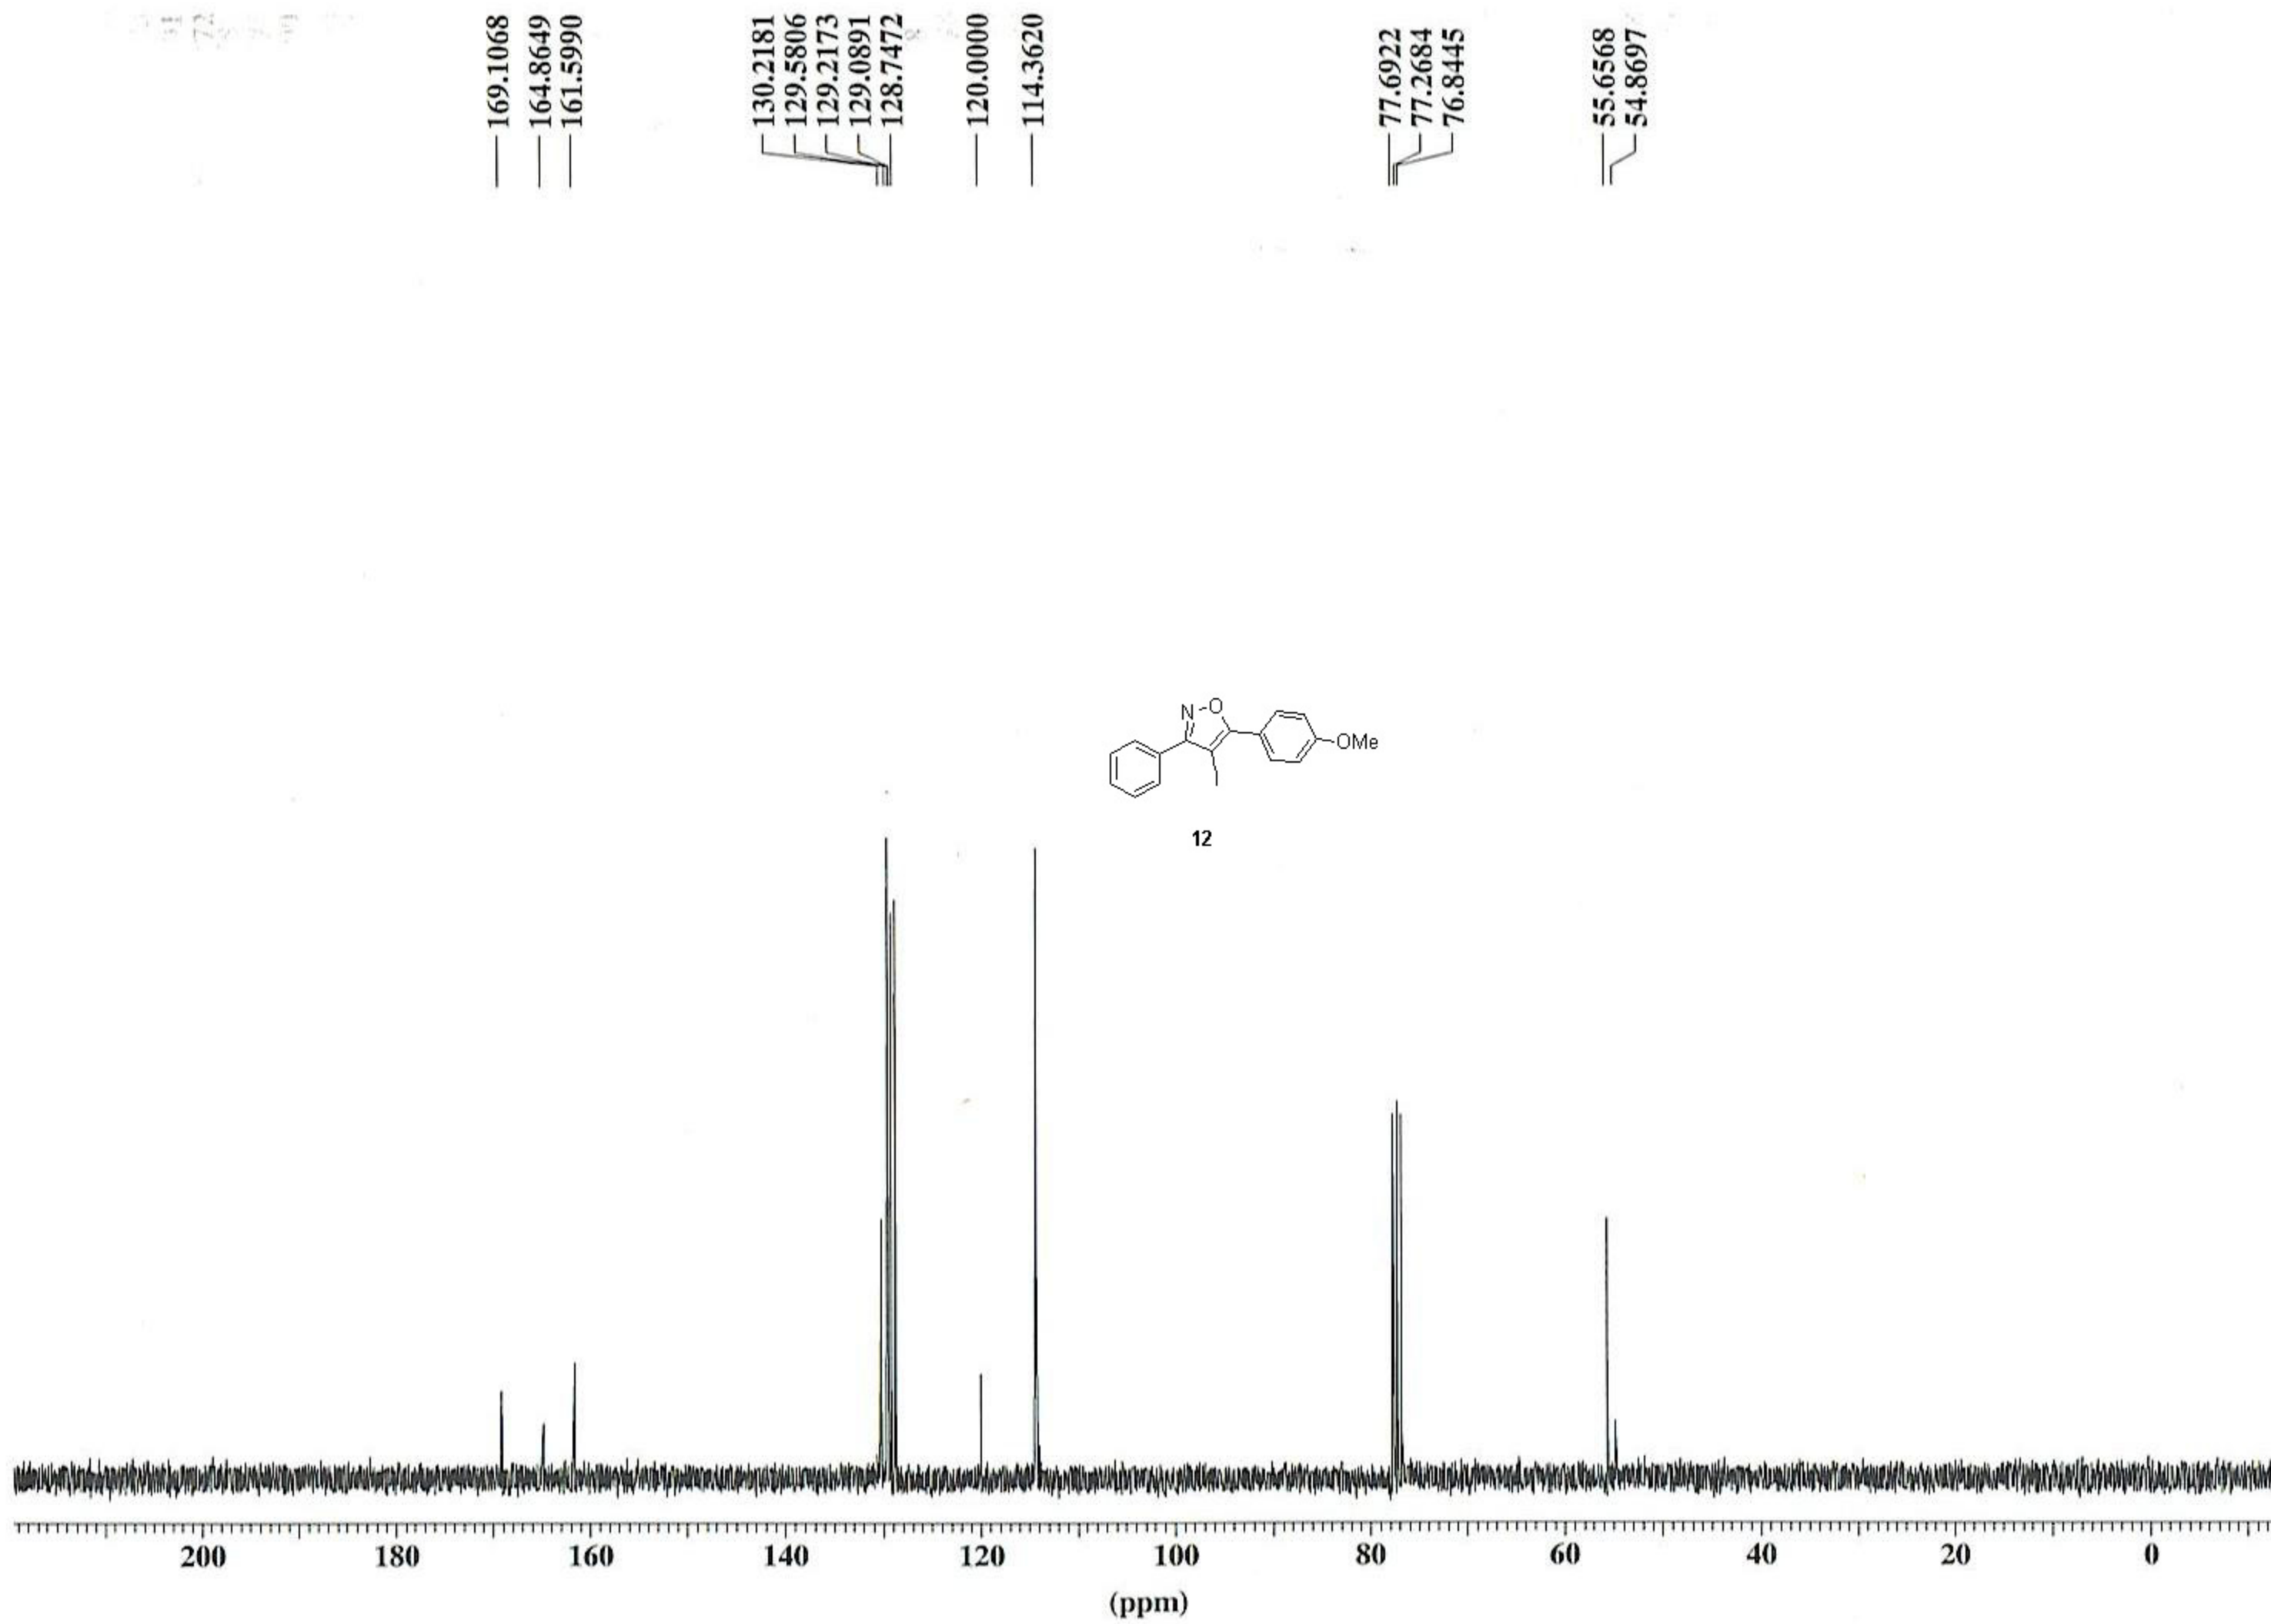

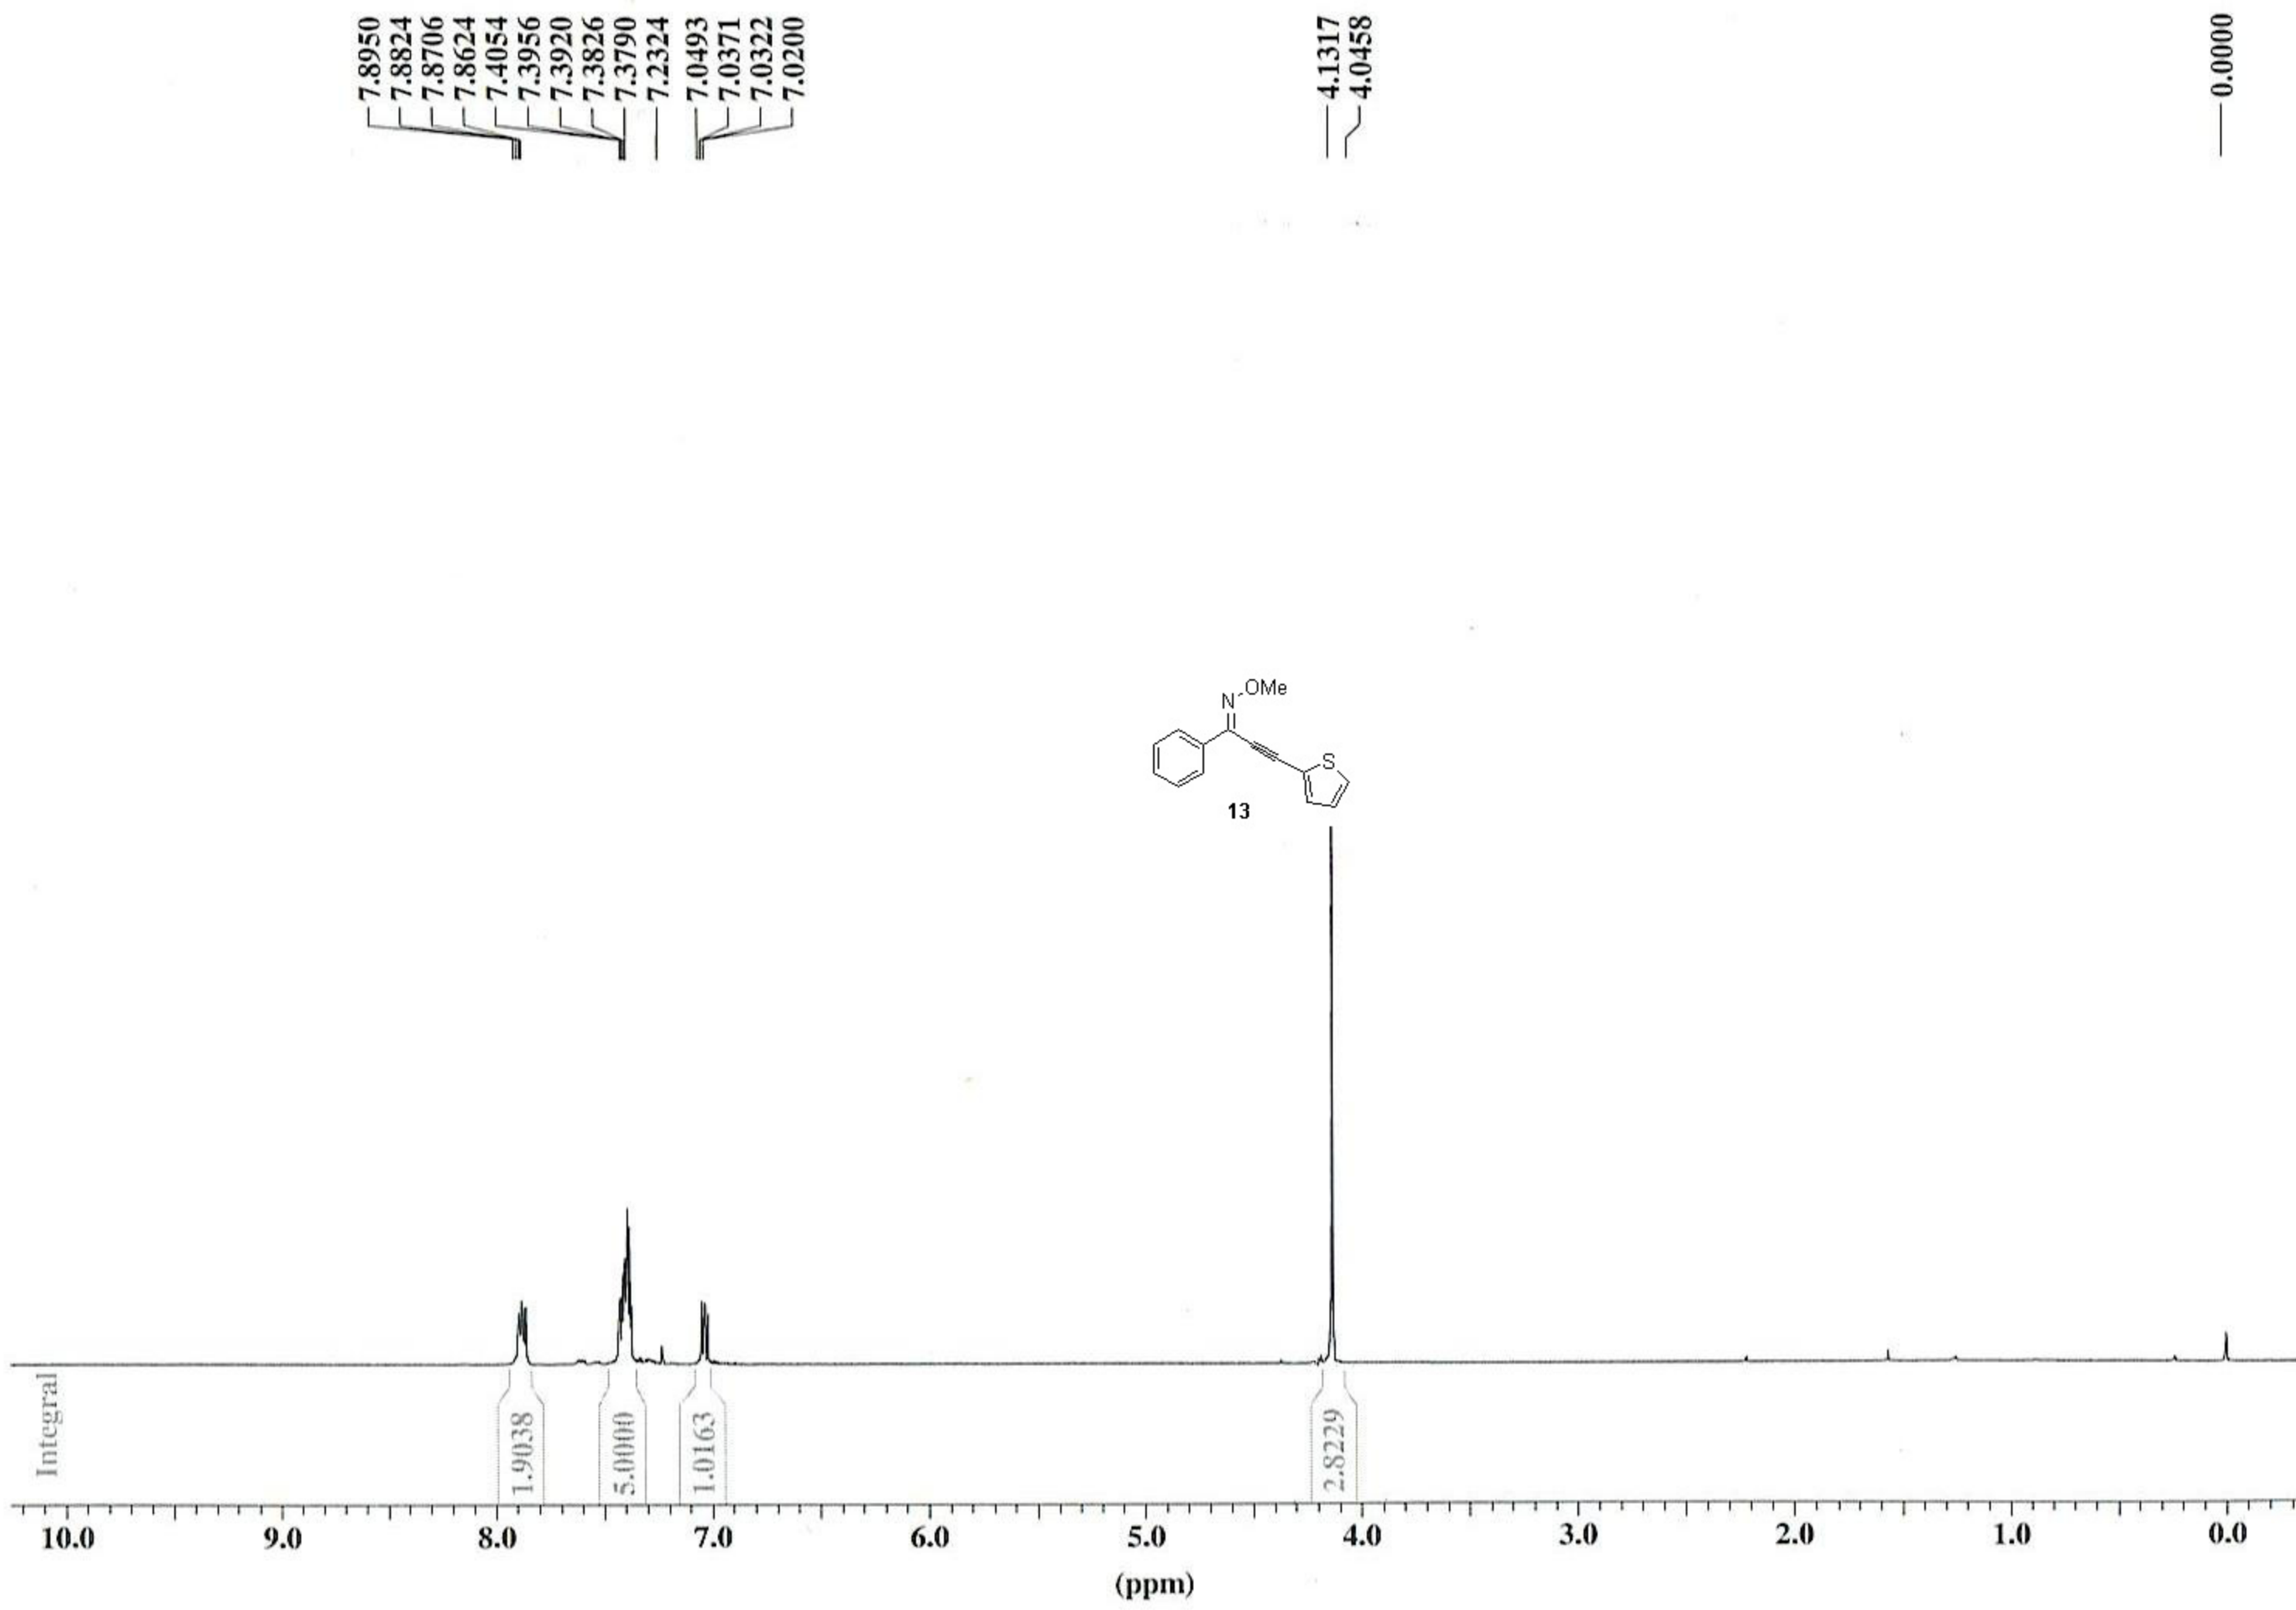

139.9518  
134.2569  
133.5659  
129.9830  
129.5877  
128.7115  
127.6288  
126.7171  
— 121.7344

— 94.6844  
— 83.7255  
77.7278  
77.3040  
76.8801  
— 63.4210

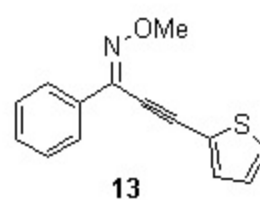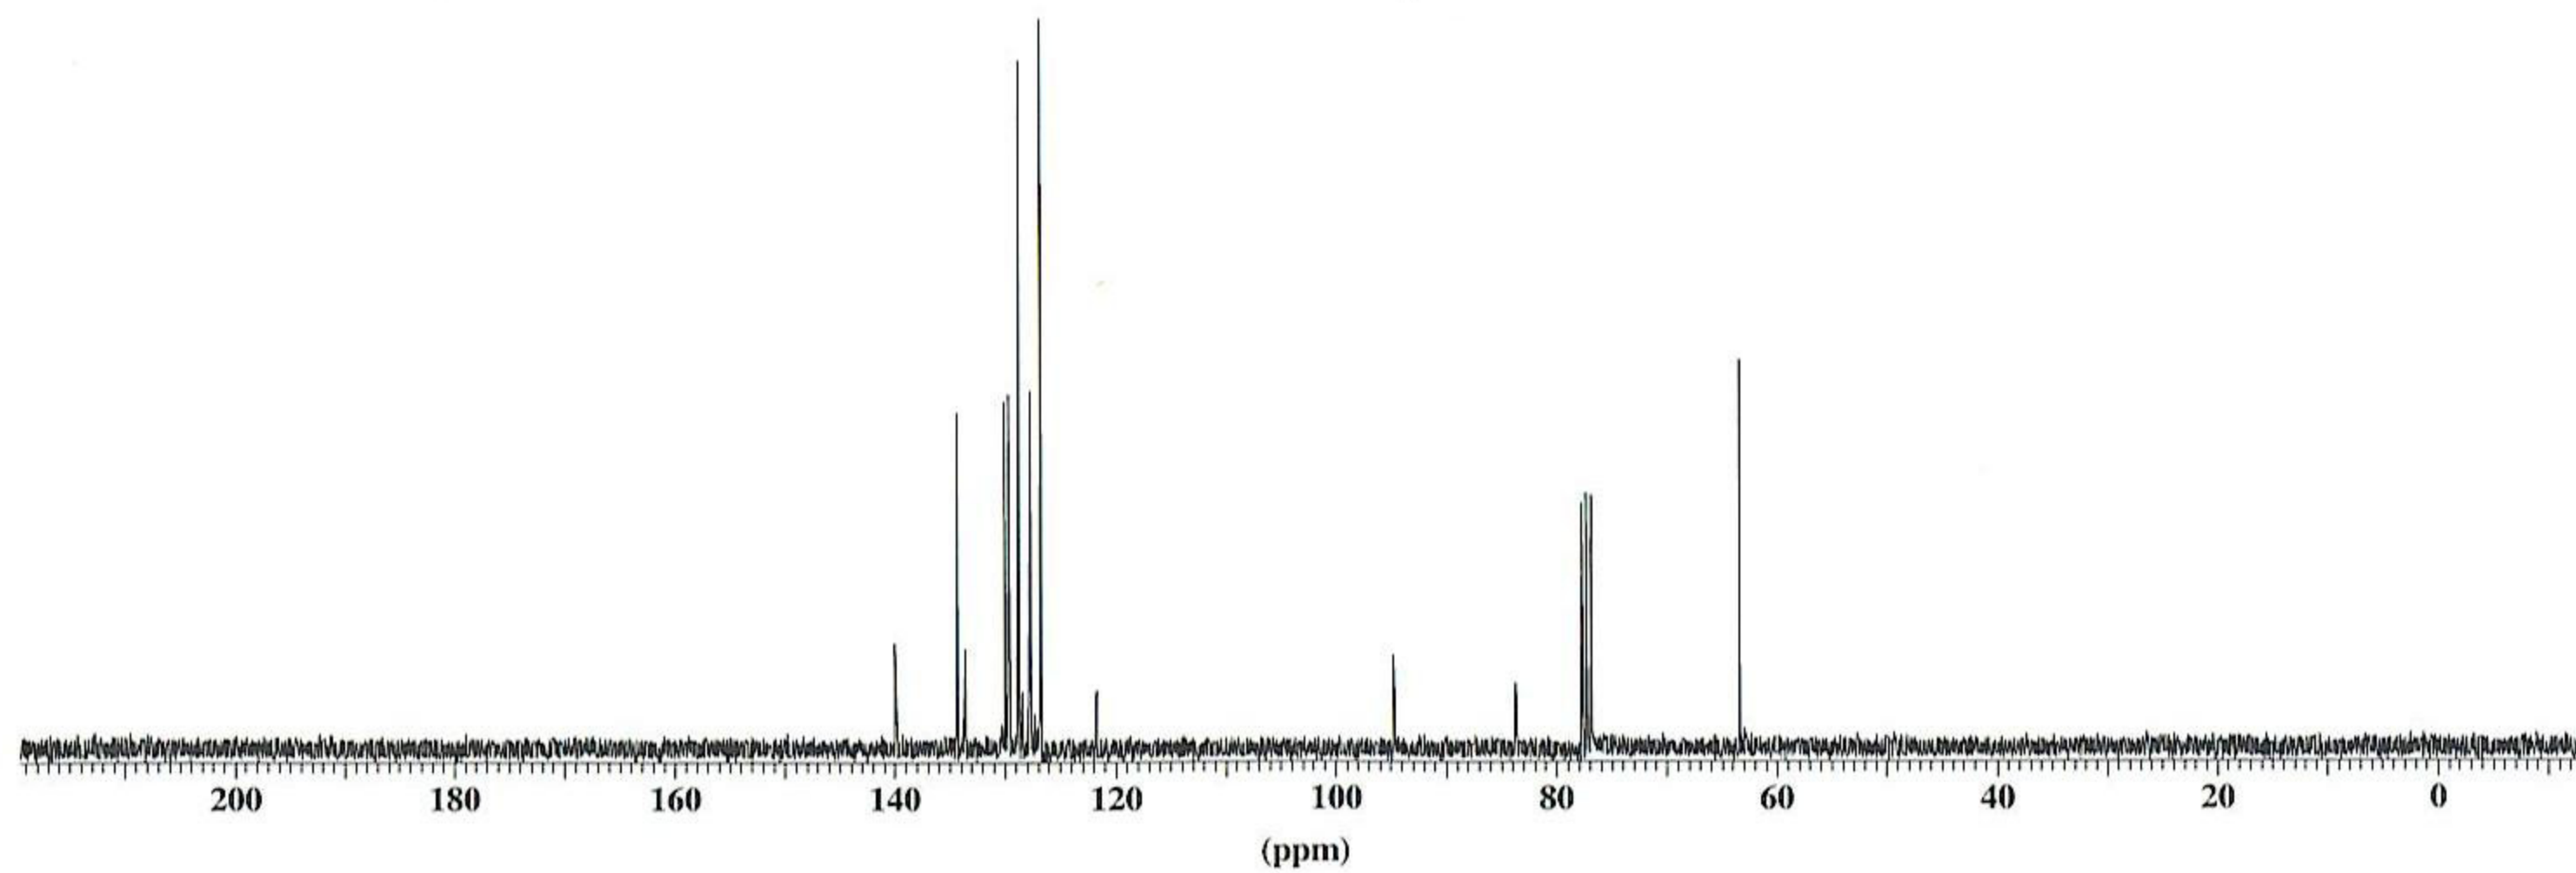

7.9984  
7.9943  
7.9858  
7.9817  
7.8034  
7.7949  
7.7831  
7.7709  
7.5702  
7.5267  
7.5169  
7.5043  
7.2565  
7.2369  
7.2243

-0.0000

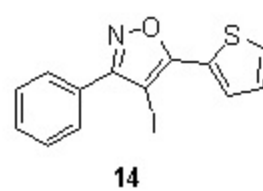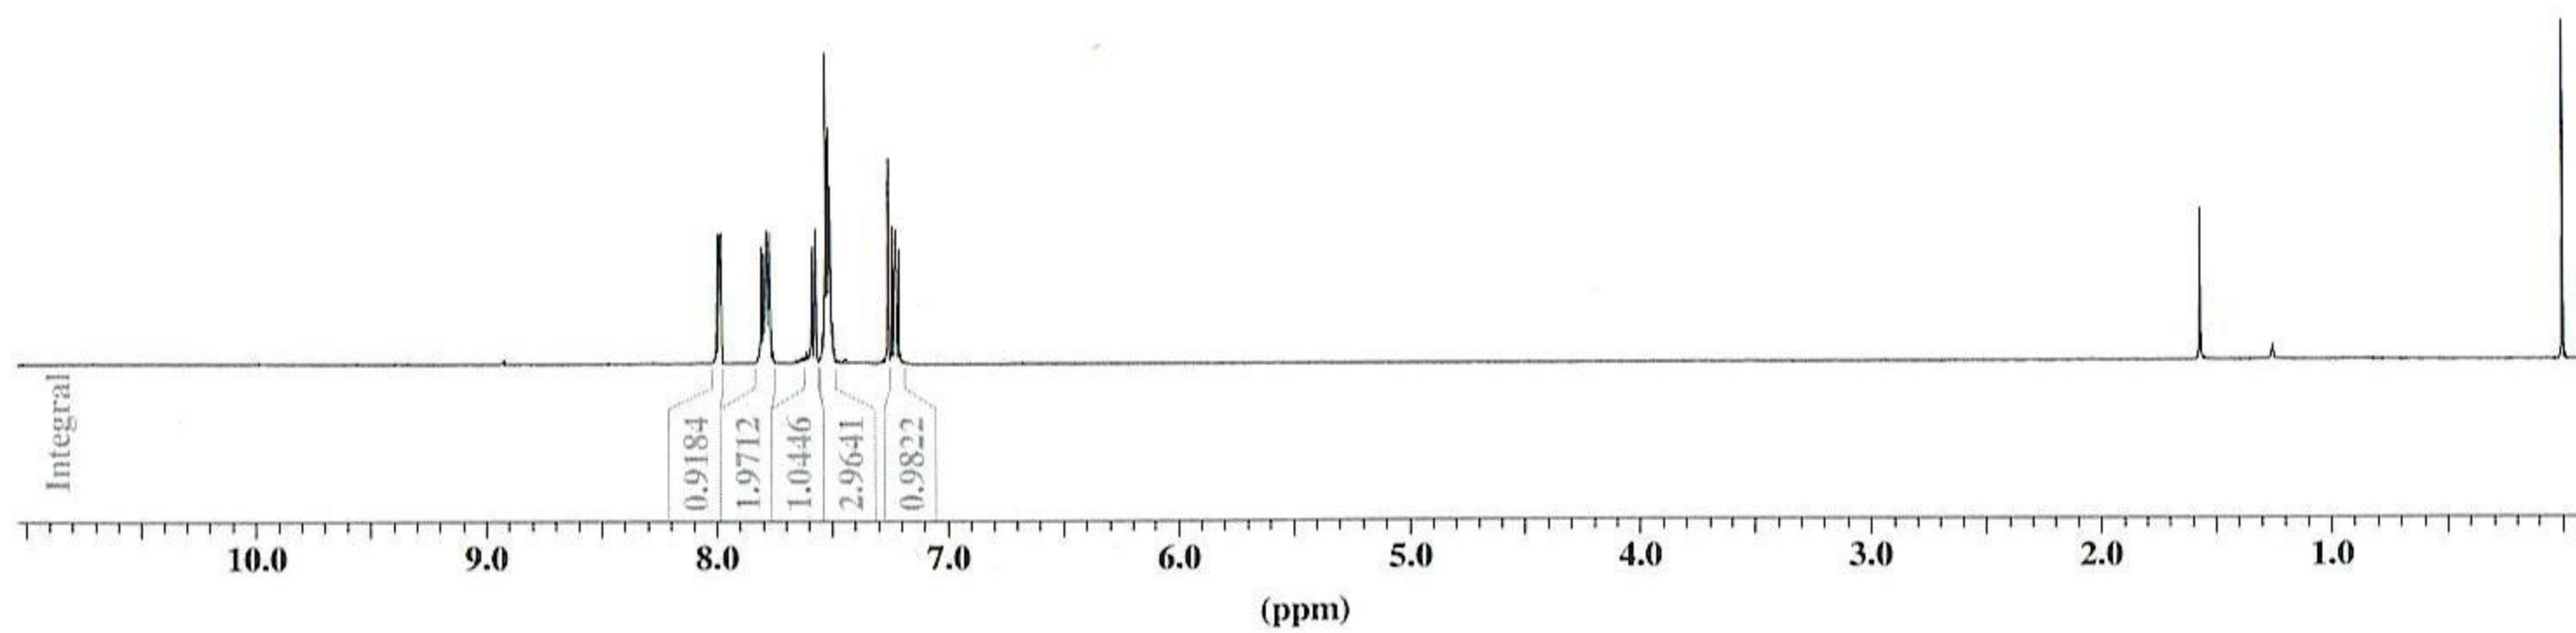



165.6236  
164.7688

130.3855  
129.2493  
129.1781  
129.1425  
128.8148  
128.6439  
128.4836  
128.0135

77.6957  
77.2719  
76.8481

55.5856

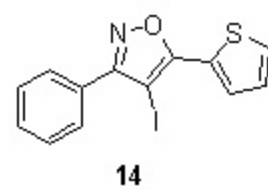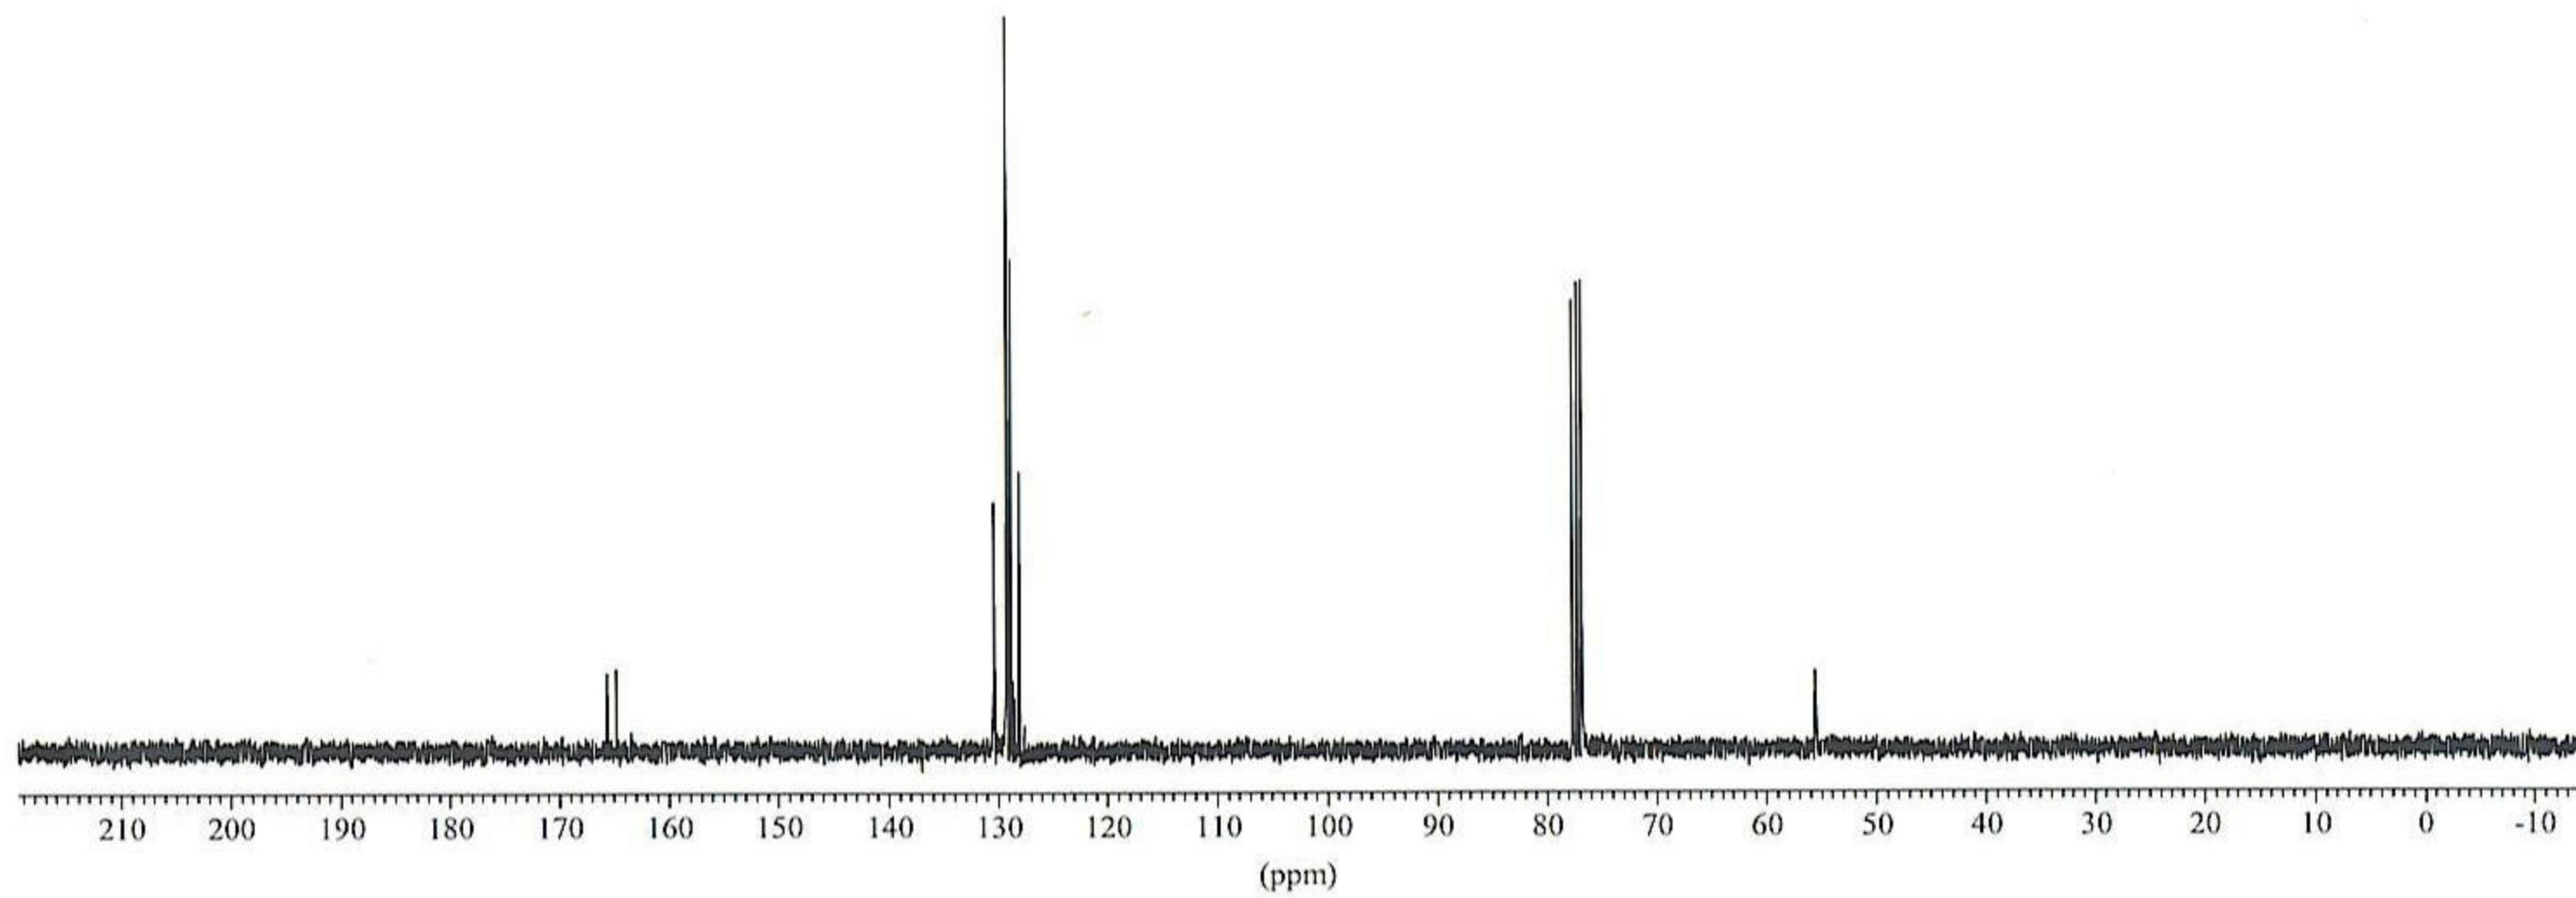

7.857  
7.852  
7.840  
7.835  
7.829  
7.615  
7.611  
7.607  
7.605  
7.601  
7.596  
7.591  
7.405  
7.402  
7.395  
7.393  
7.388  
7.383  
7.379  
7.377  
7.371  
7.366  
7.360  
7.354  
7.349  
7.343

4.128

0.000

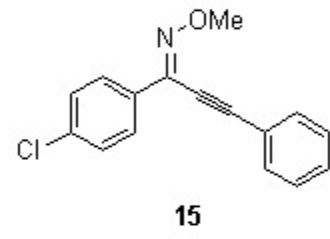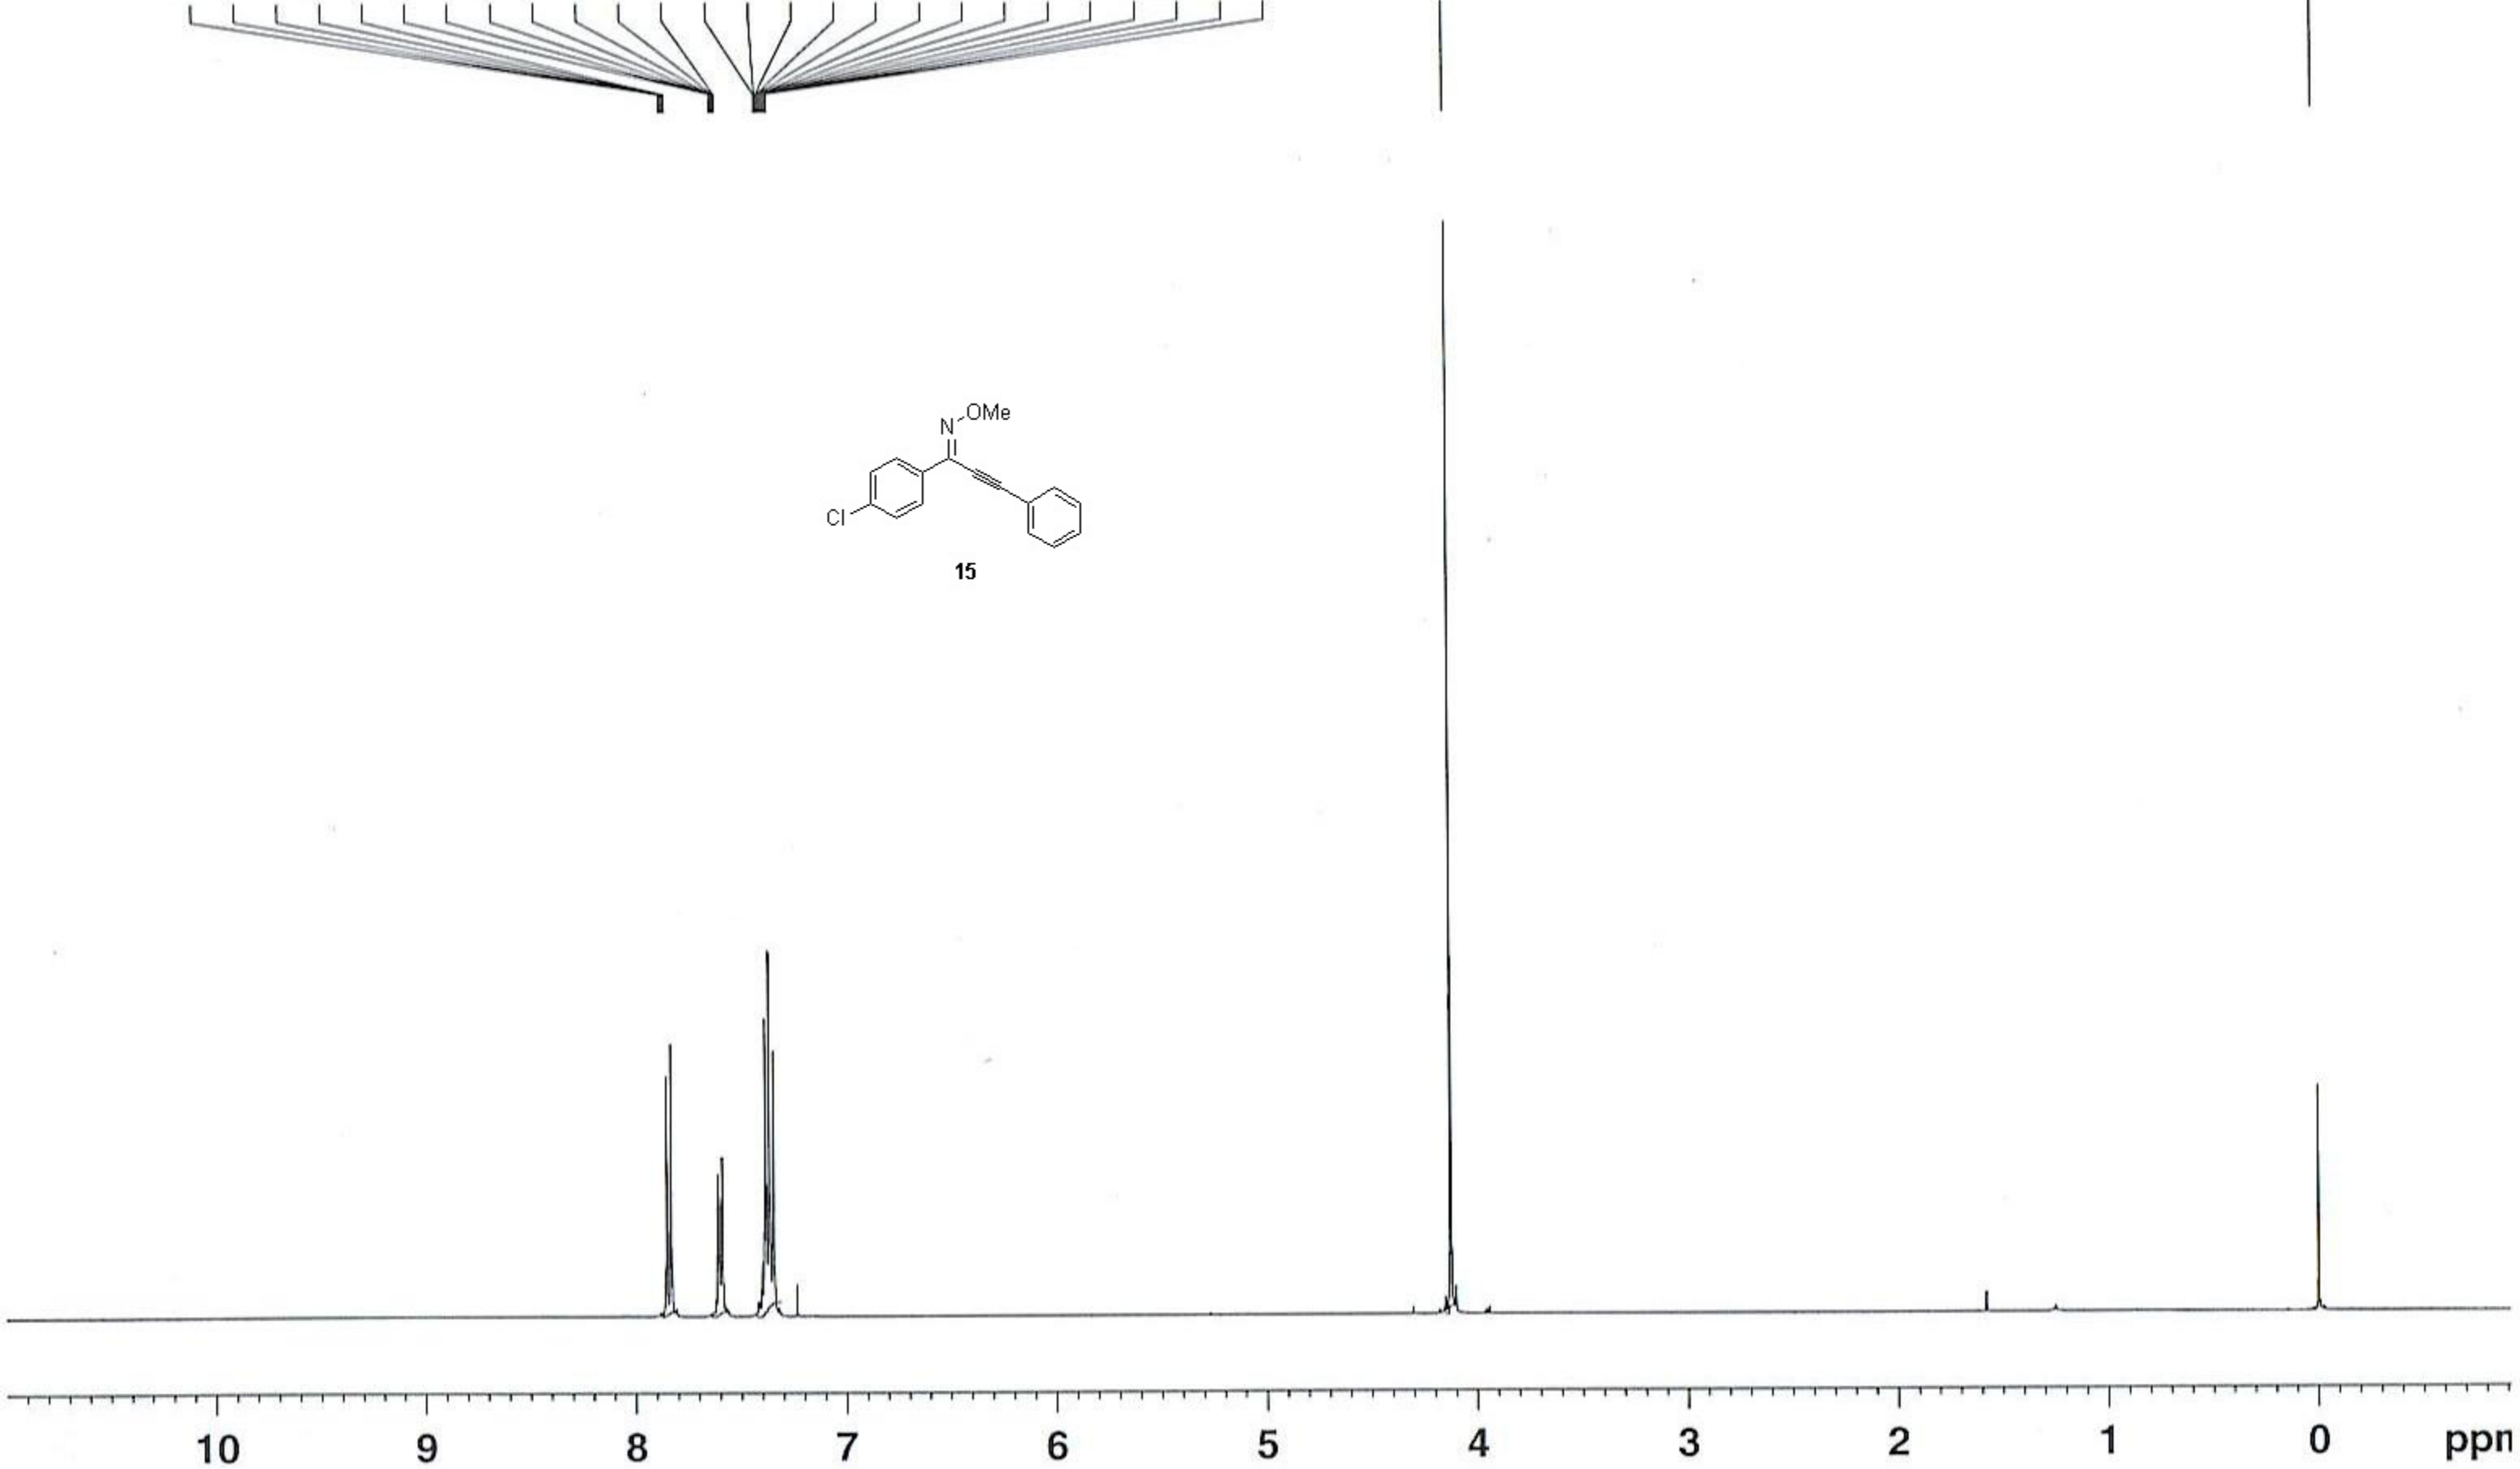

1.97  
2.00  
5.03

S42

3.00

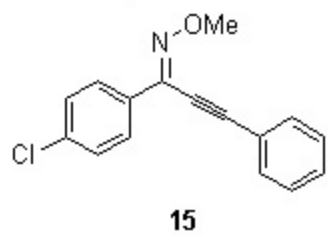

139.009  
135.793  
132.320  
132.222  
129.850  
128.794  
128.652  
127.880  
121.698  
101.691  
79.199  
77.545  
77.228  
76.911  
63.437

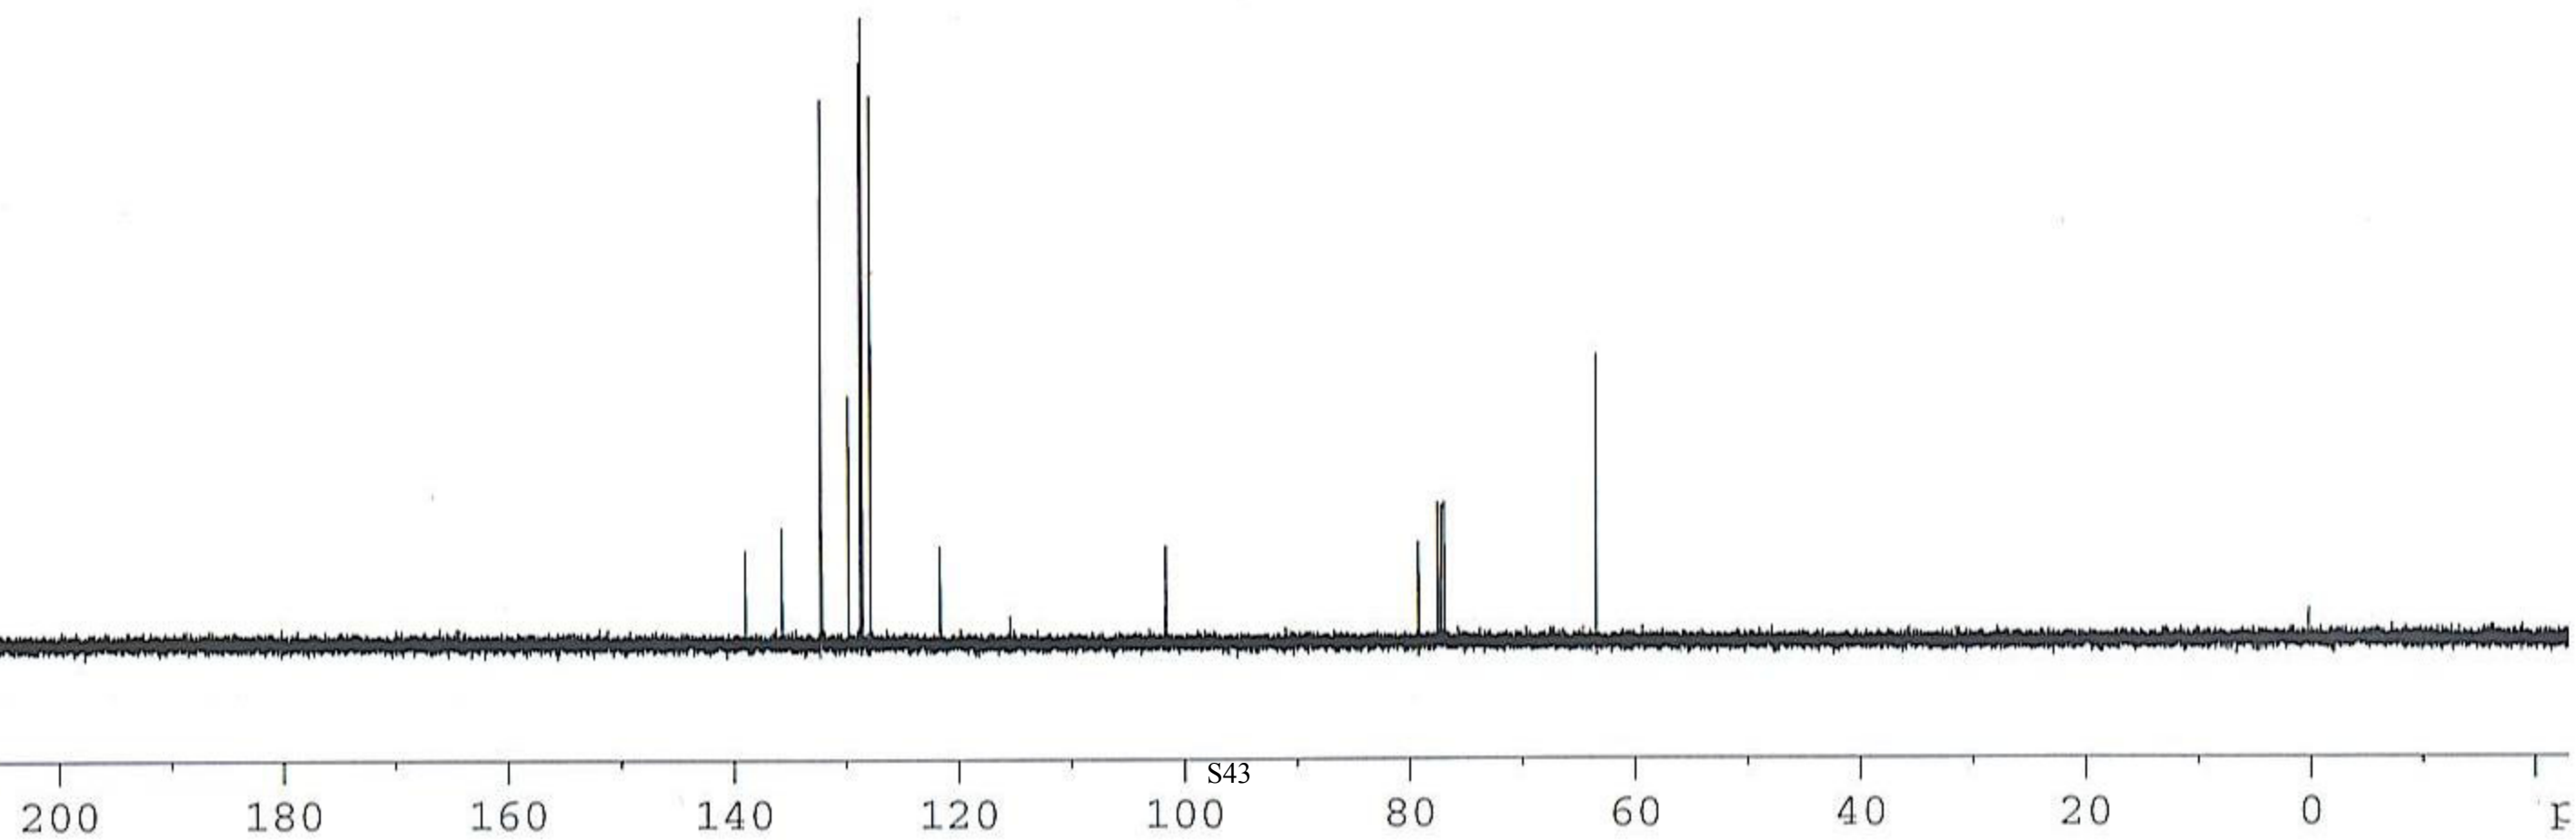

8.066  
8.064  
8.061  
8.057  
8.055  
8.048  
8.042  
7.754  
7.748  
7.737  
7.732  
7.530  
7.527  
7.525  
7.519  
7.513  
7.499  
7.494  
7.482  
7.477

0.000

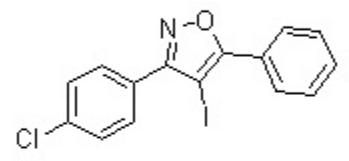

16

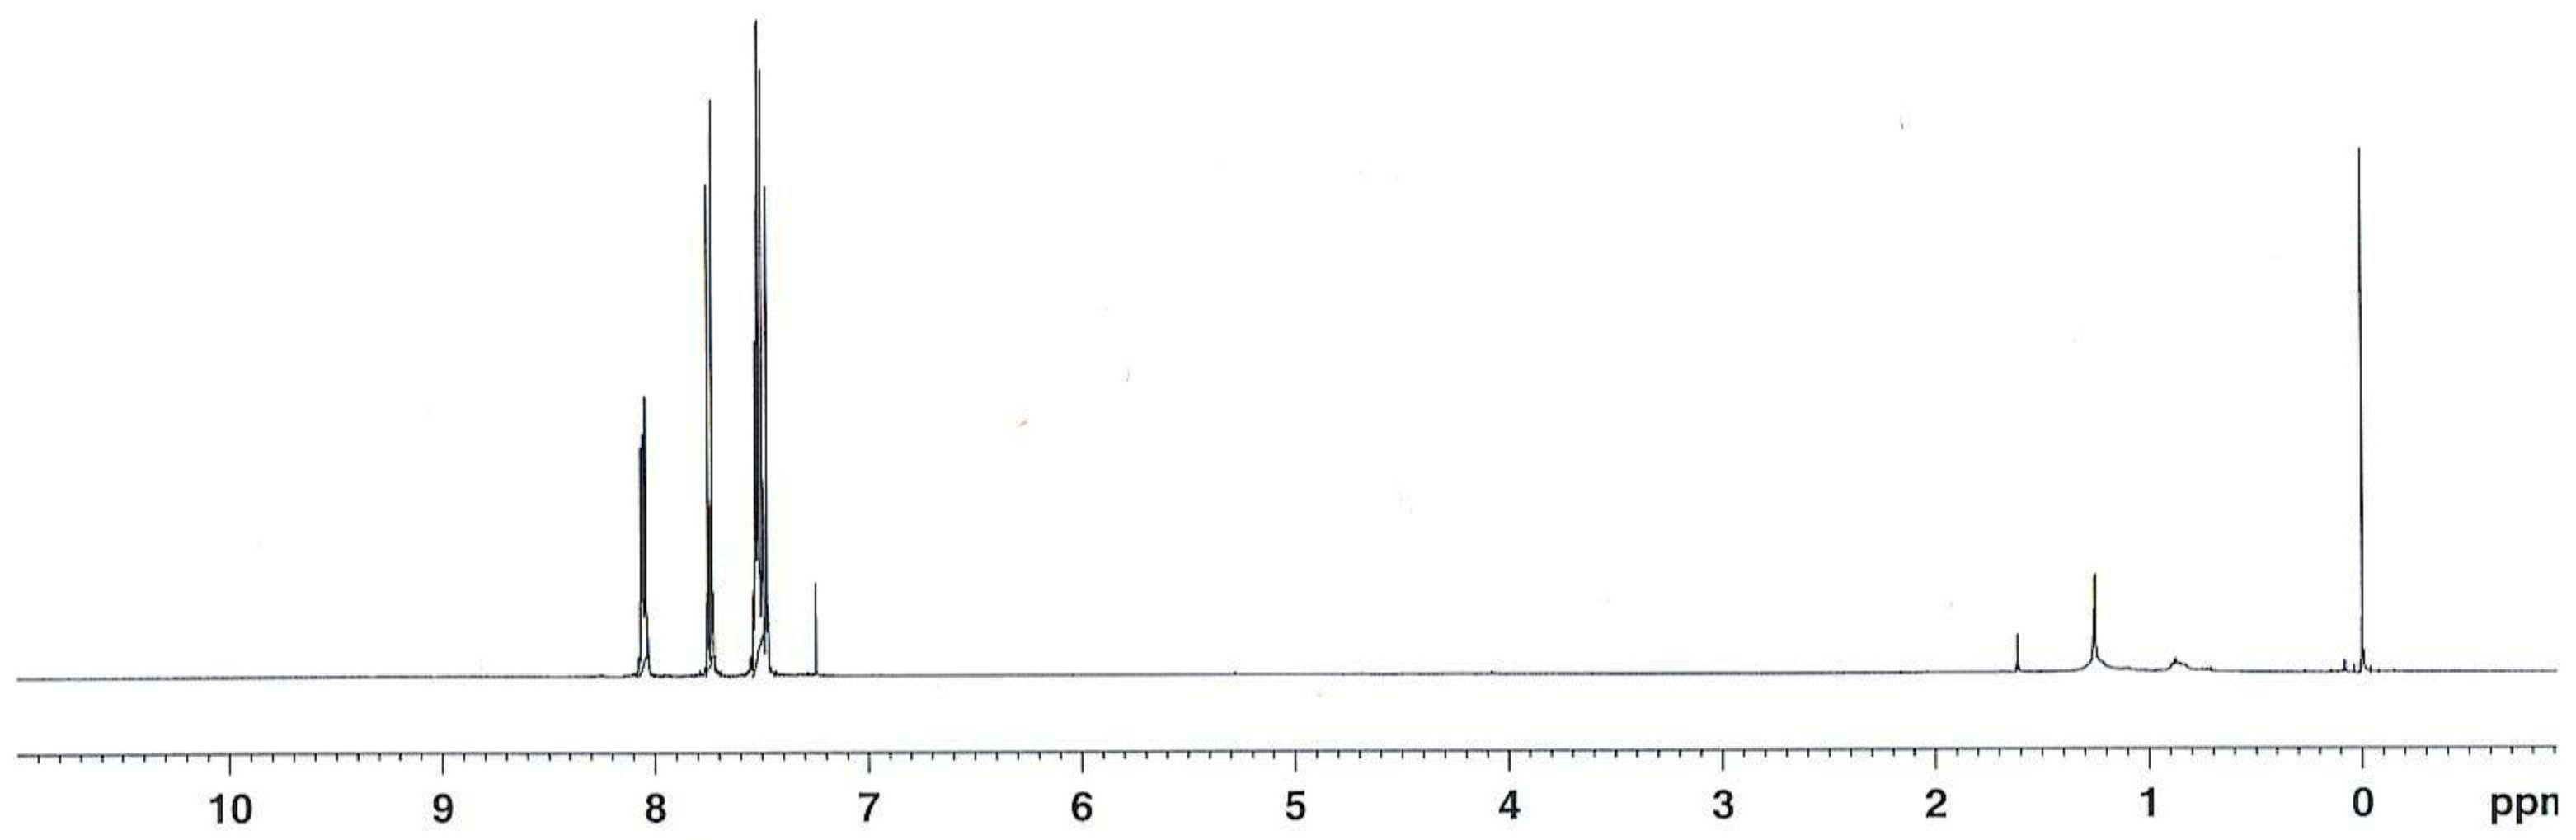

2.00  
2.00  
5.11

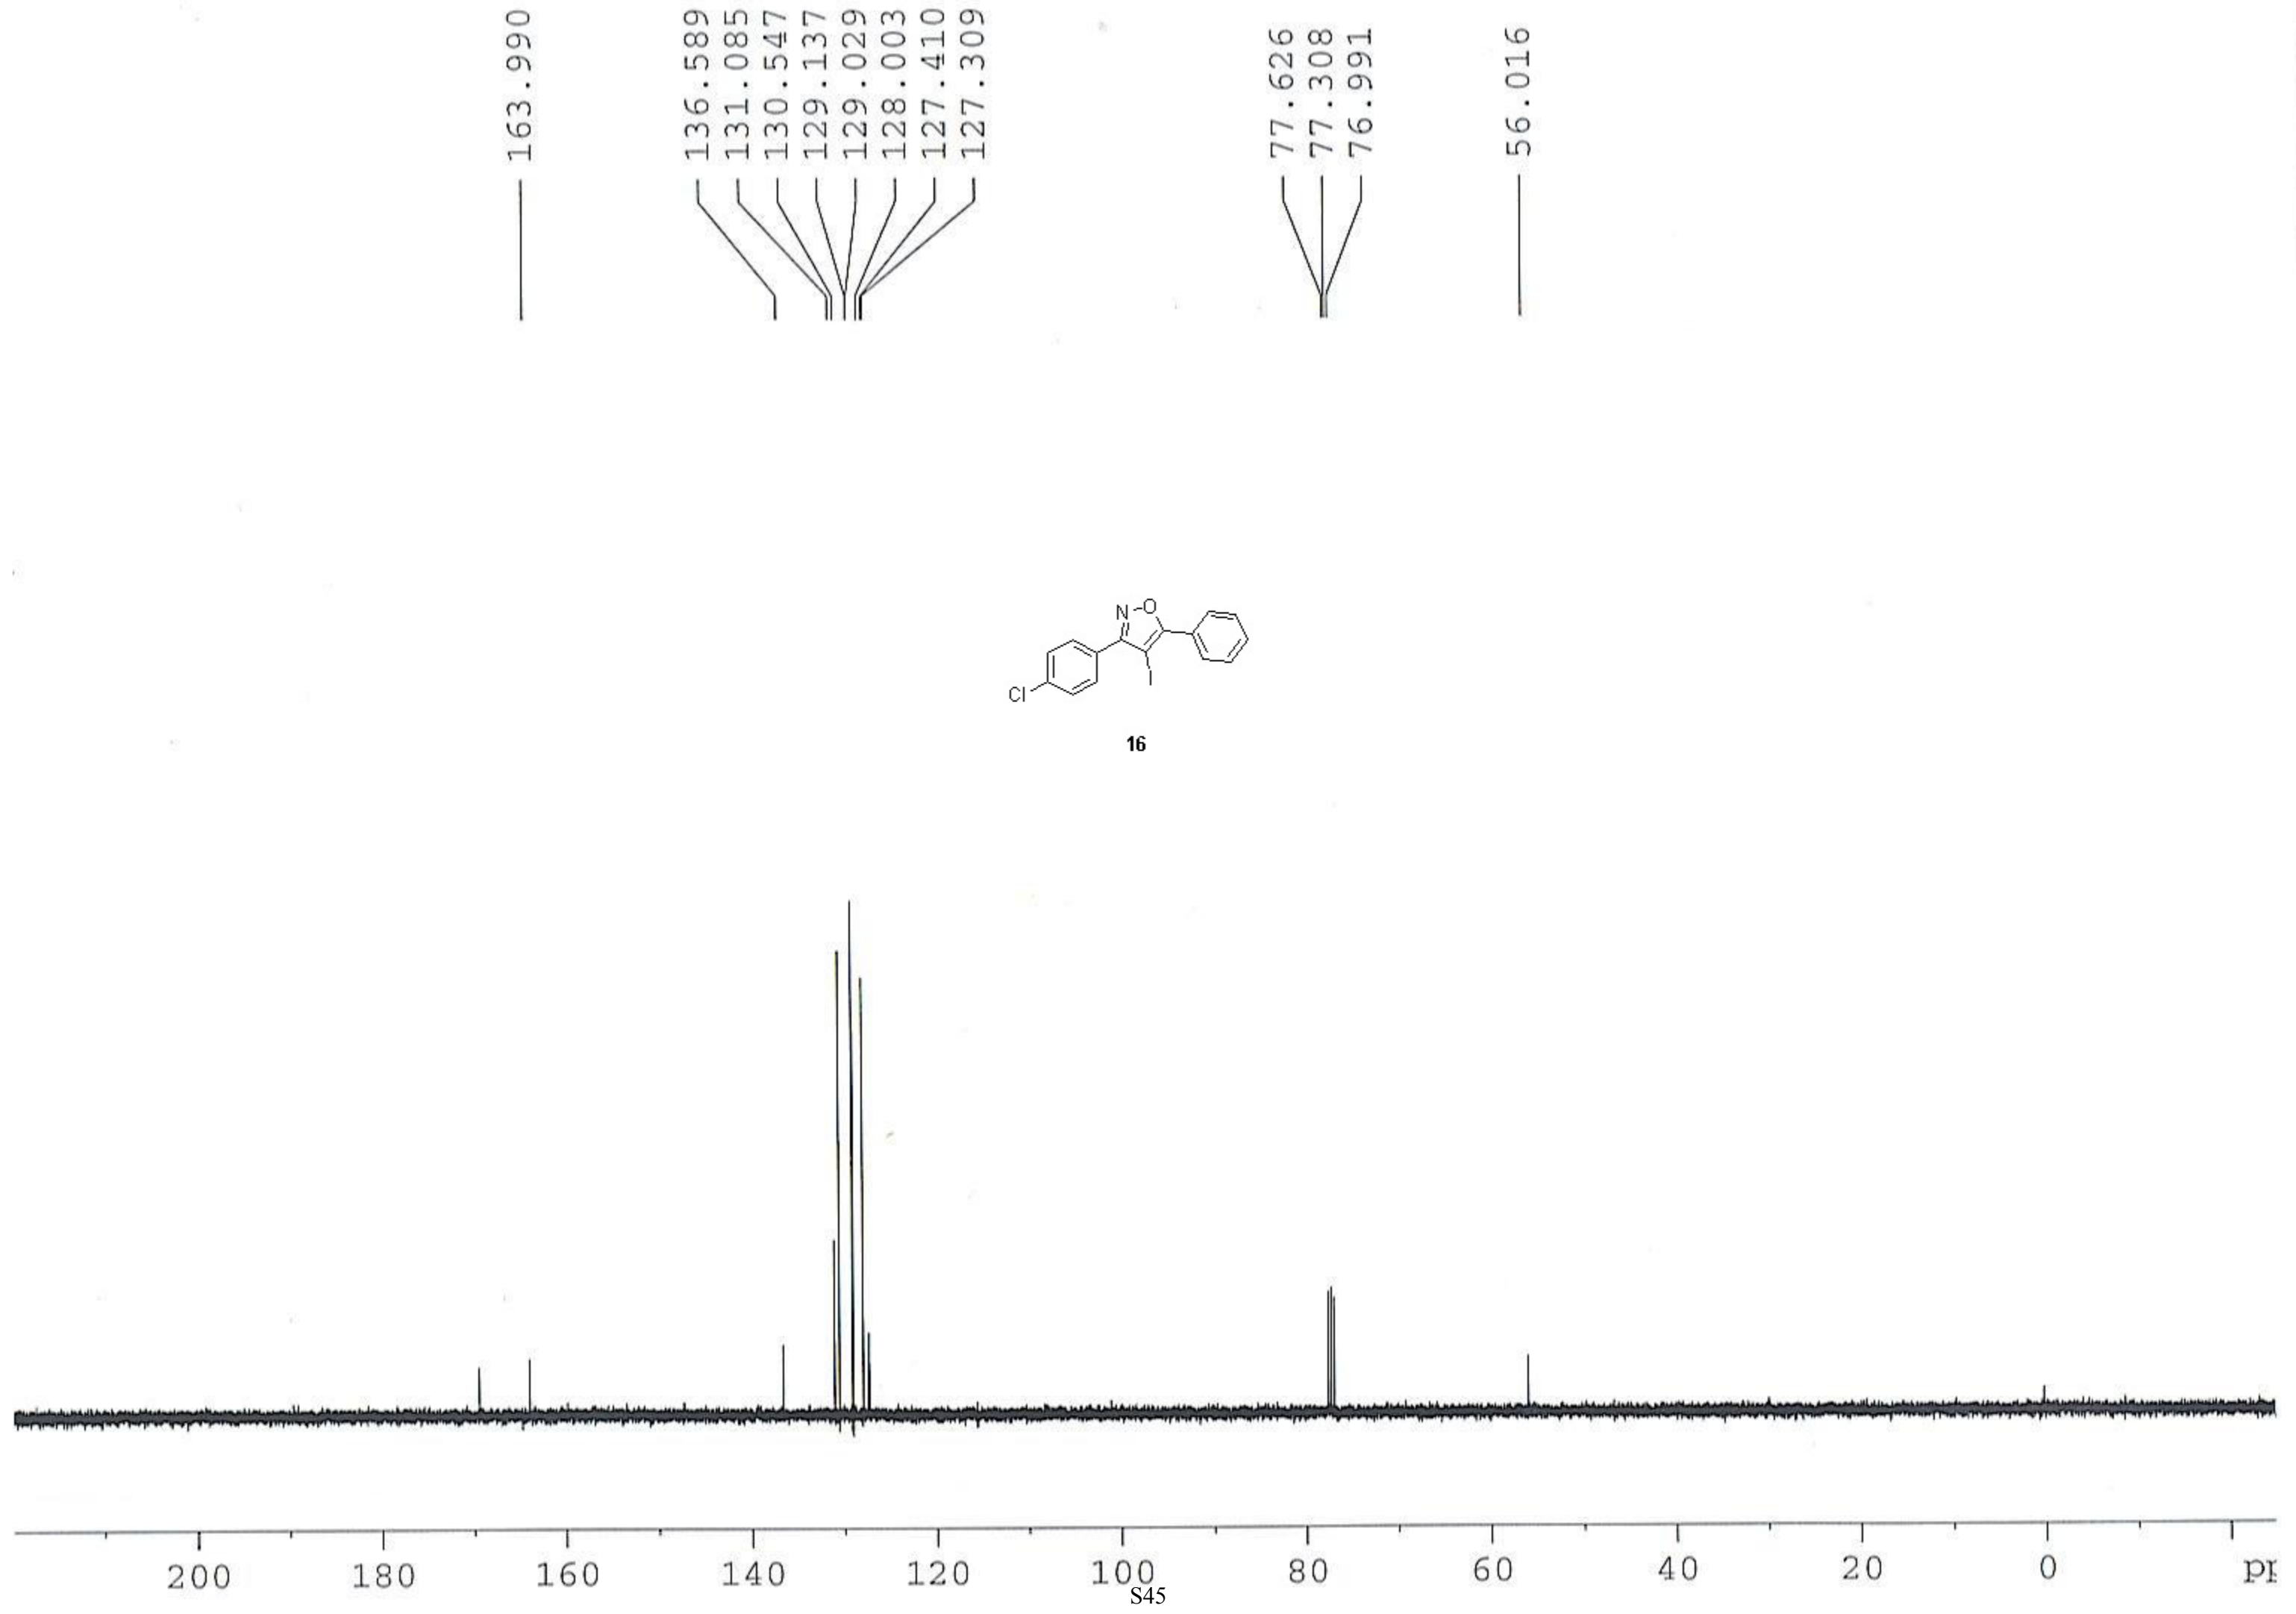

8.039  
8.038  
8.019  
8.018  
7.663  
7.642  
7.641  
7.633  
7.631  
7.629  
7.628  
7.614  
7.609  
7.415  
7.410  
7.405  
7.391  
7.390

4.167

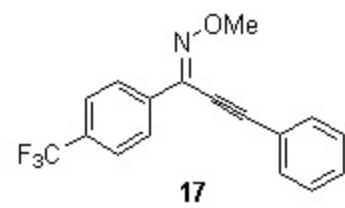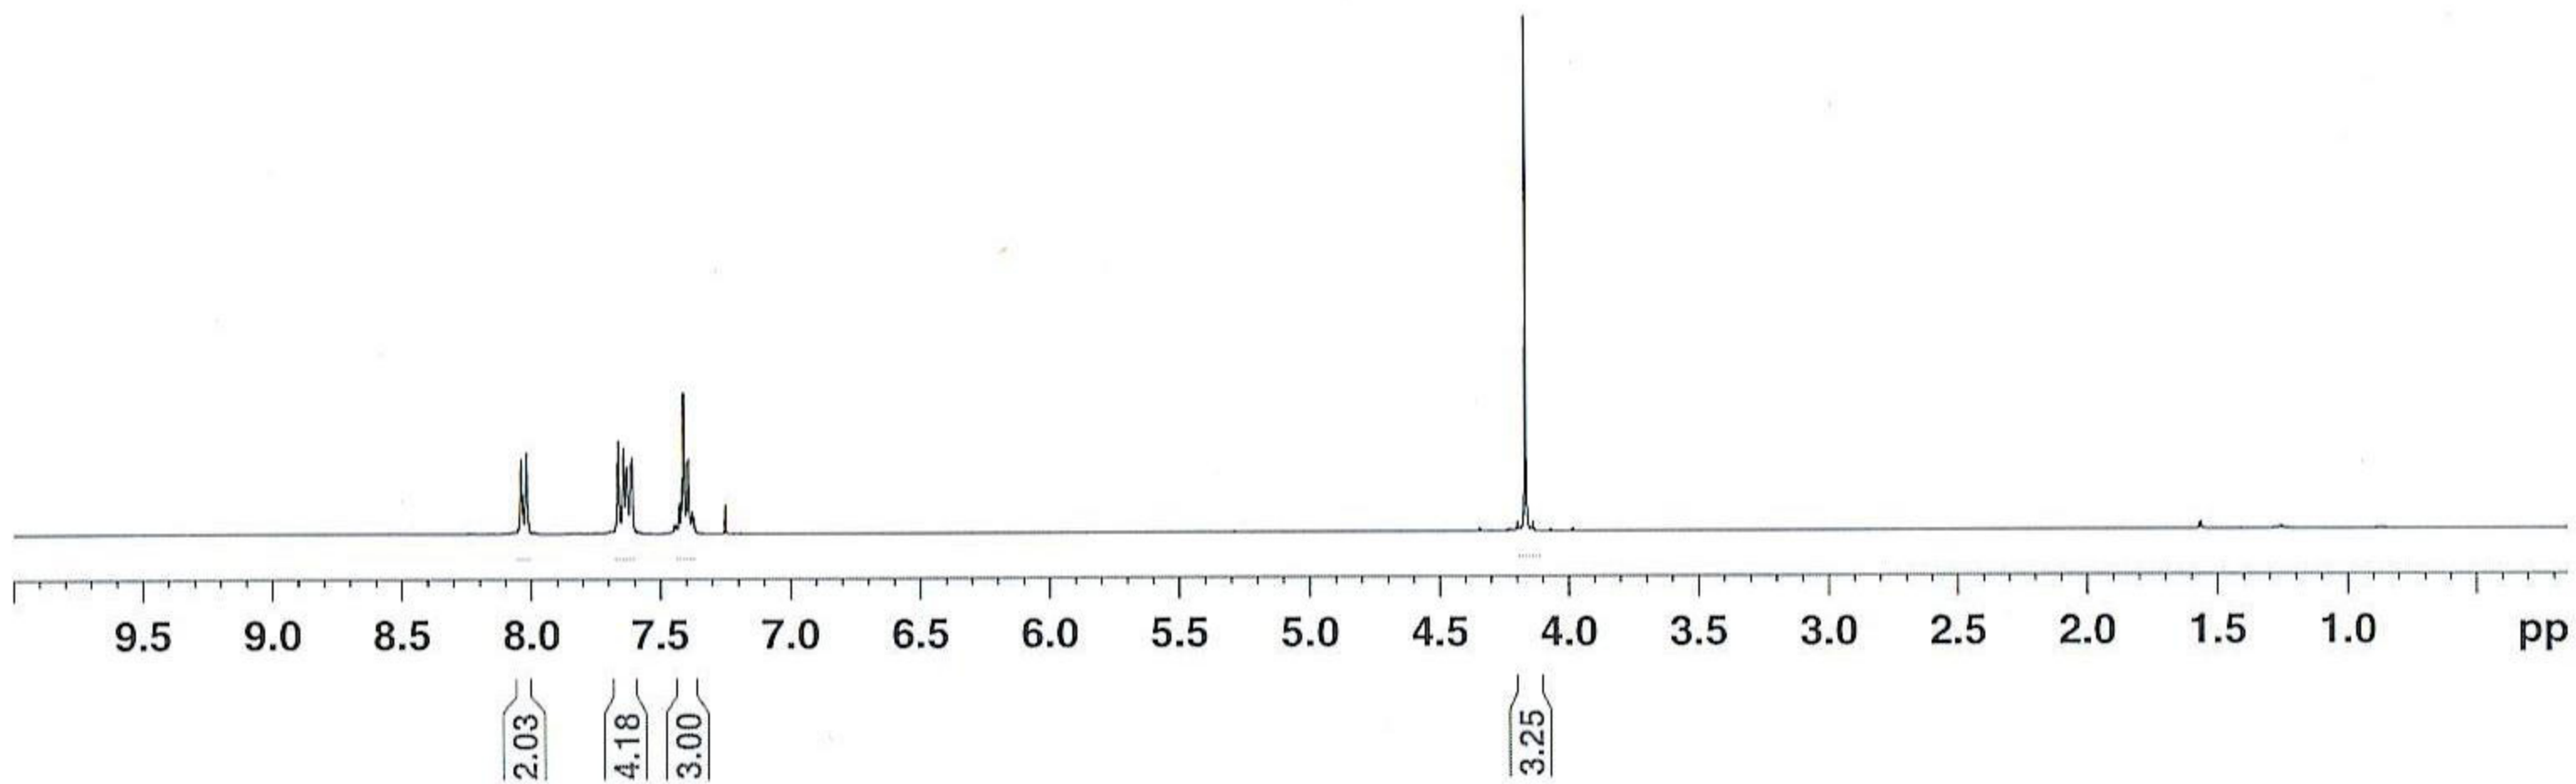

138.915  
137.151  
132.427  
132.419  
132.409  
132.398  
132.390  
130.033  
128.768  
128.758  
128.750  
126.990  
126.963  
126.953  
126.945  
125.649  
125.611  
125.573  
125.535  
121.649  
102.159  
79.095  
77.587  
77.270  
76.951  
63.686

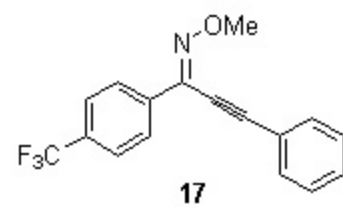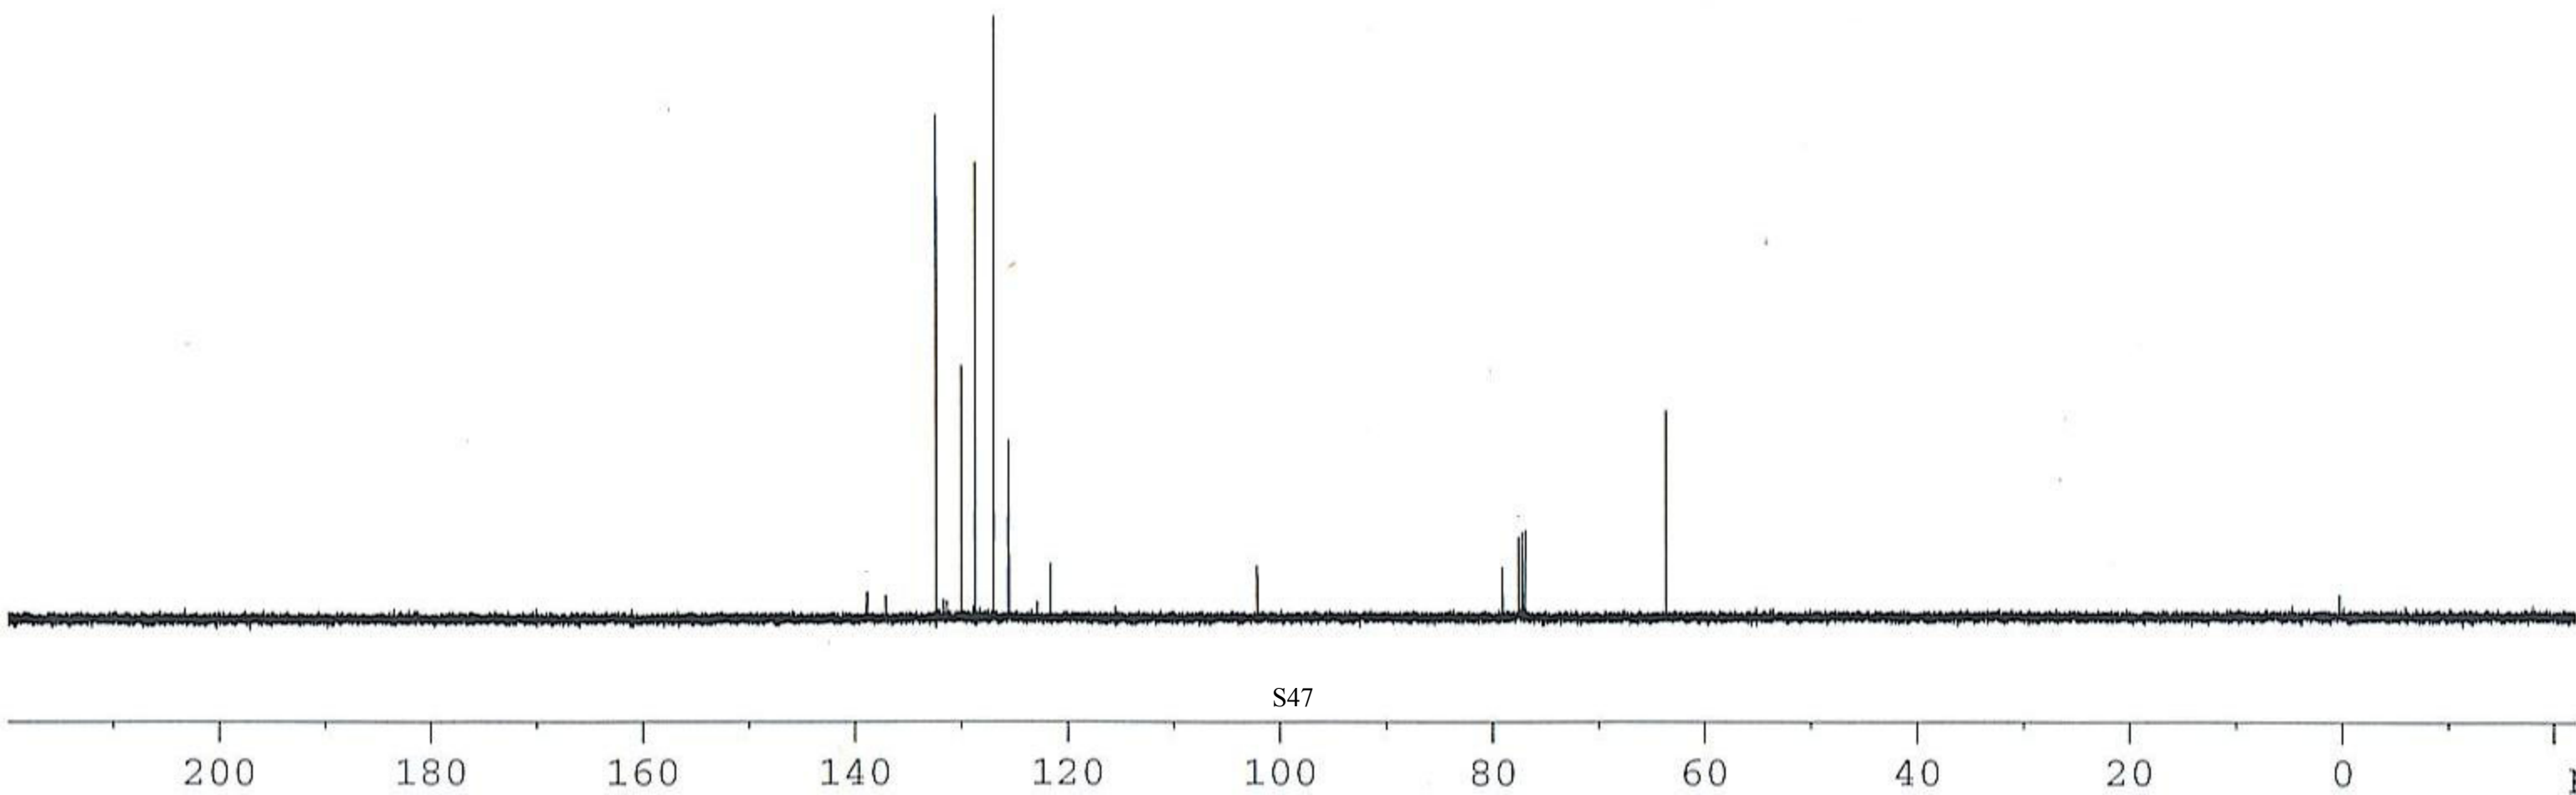

8.079  
8.076  
8.074  
8.070  
8.067  
8.061  
8.059  
8.055  
7.945  
7.944  
7.923  
7.792  
7.772  
7.551  
7.543  
7.541  
7.538  
7.533  
7.526

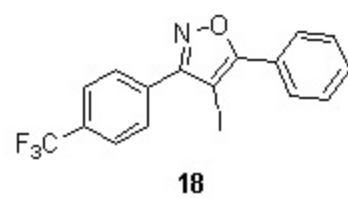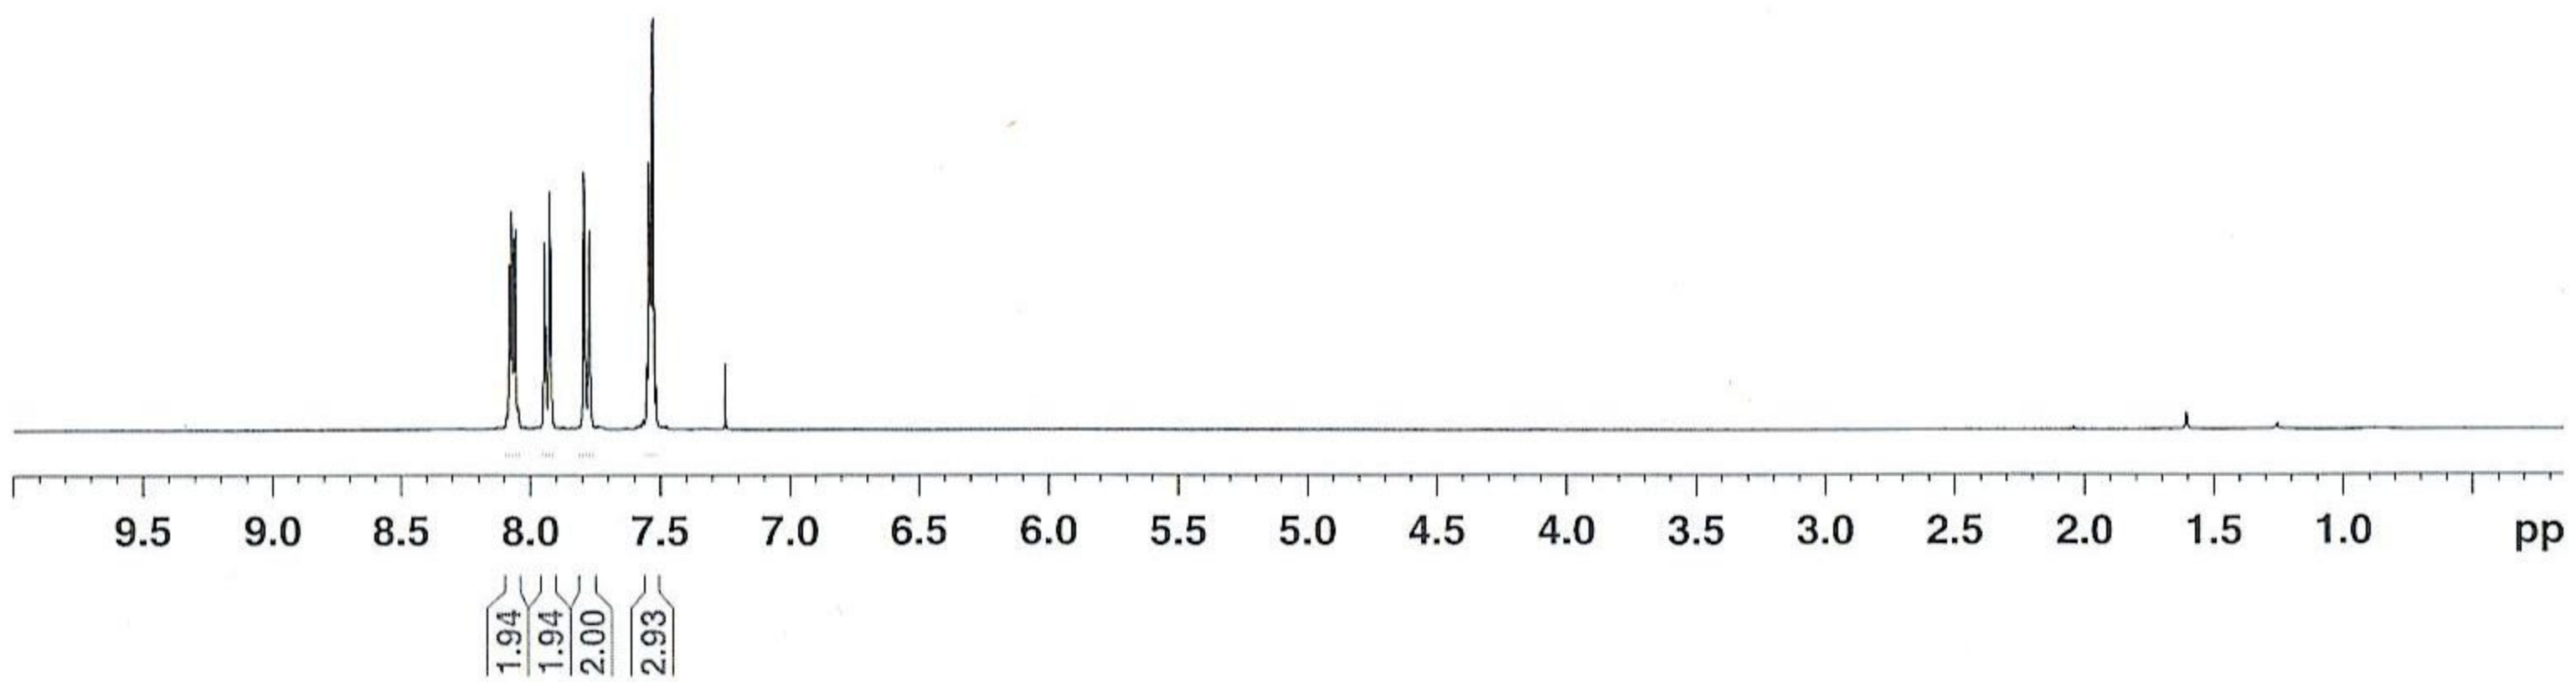



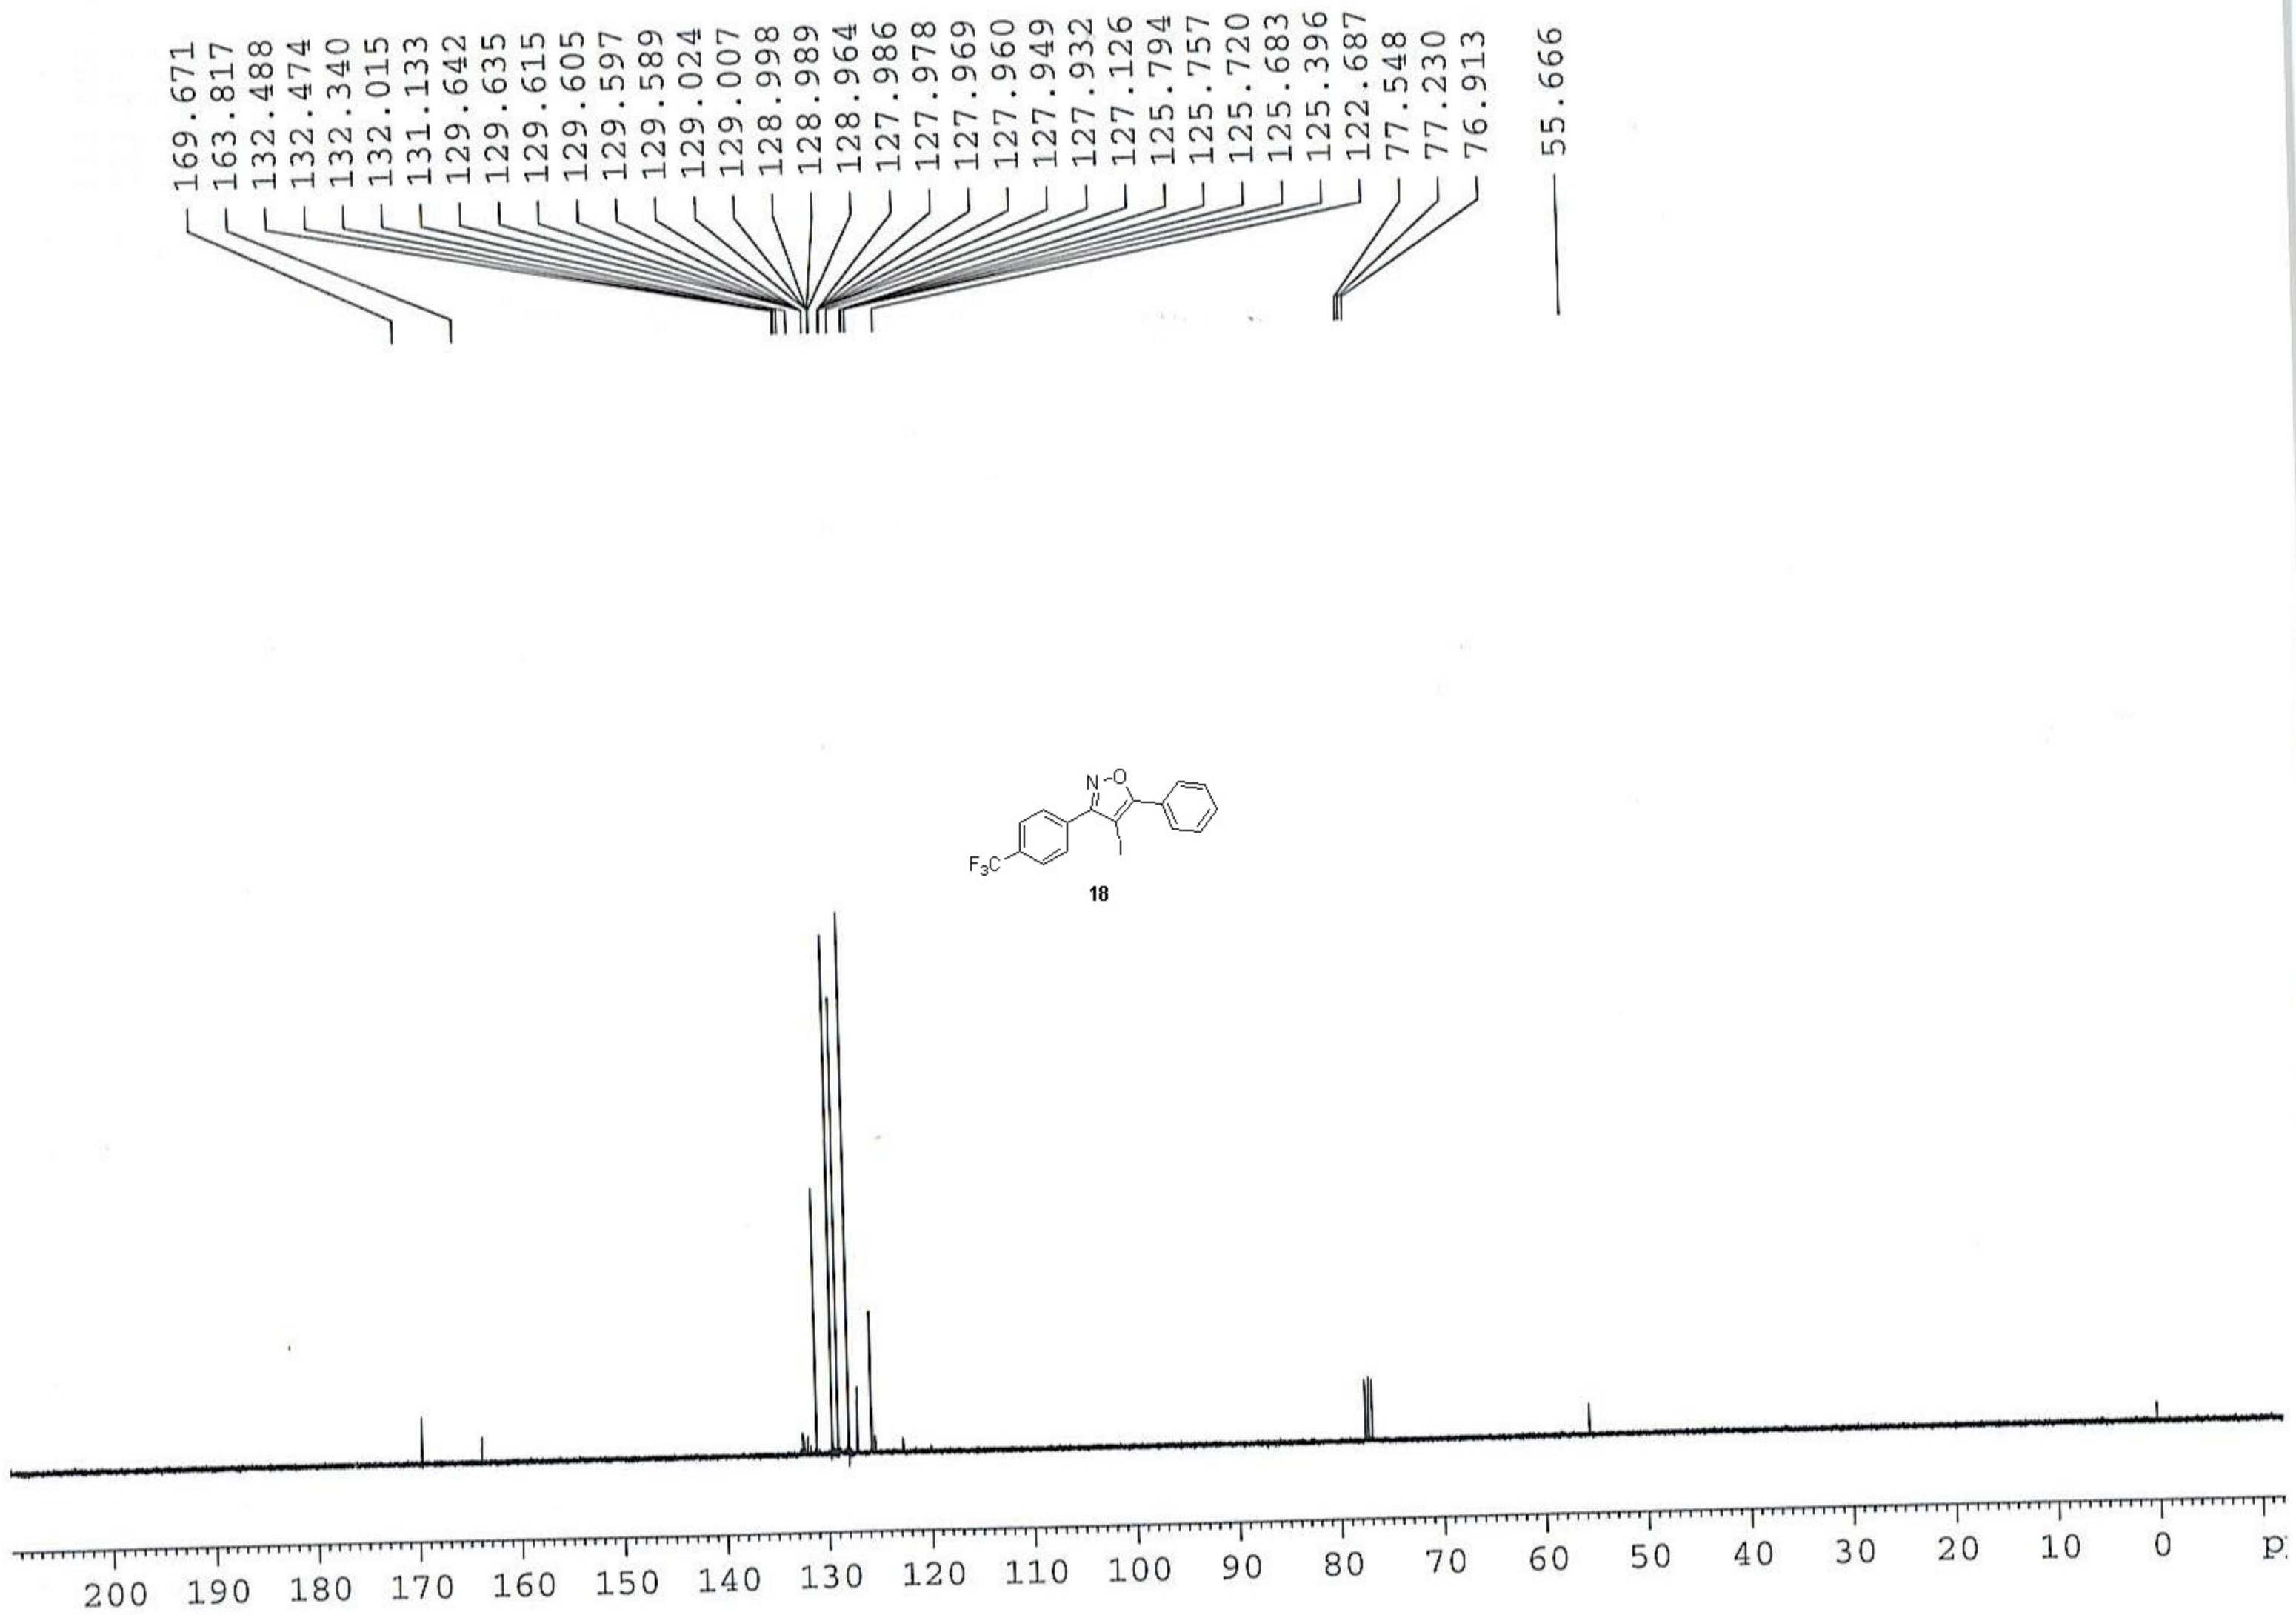

Current Data Paramete  
NAME jw-276.f  
EXPNO  
PROCNO

7.799  
7.794  
7.782  
7.776  
7.621  
7.616  
7.612  
7.608  
7.605  
7.604  
7.602  
7.599  
7.597  
7.386  
7.384  
7.378  
7.374  
7.367  
7.365  
7.363  
7.361  
7.352  
7.349  
7.246  
6.710  
6.704  
6.696  
6.692  
6.687

4.095

2.994

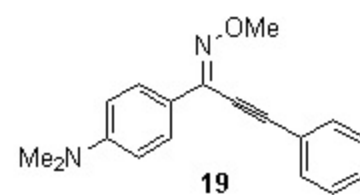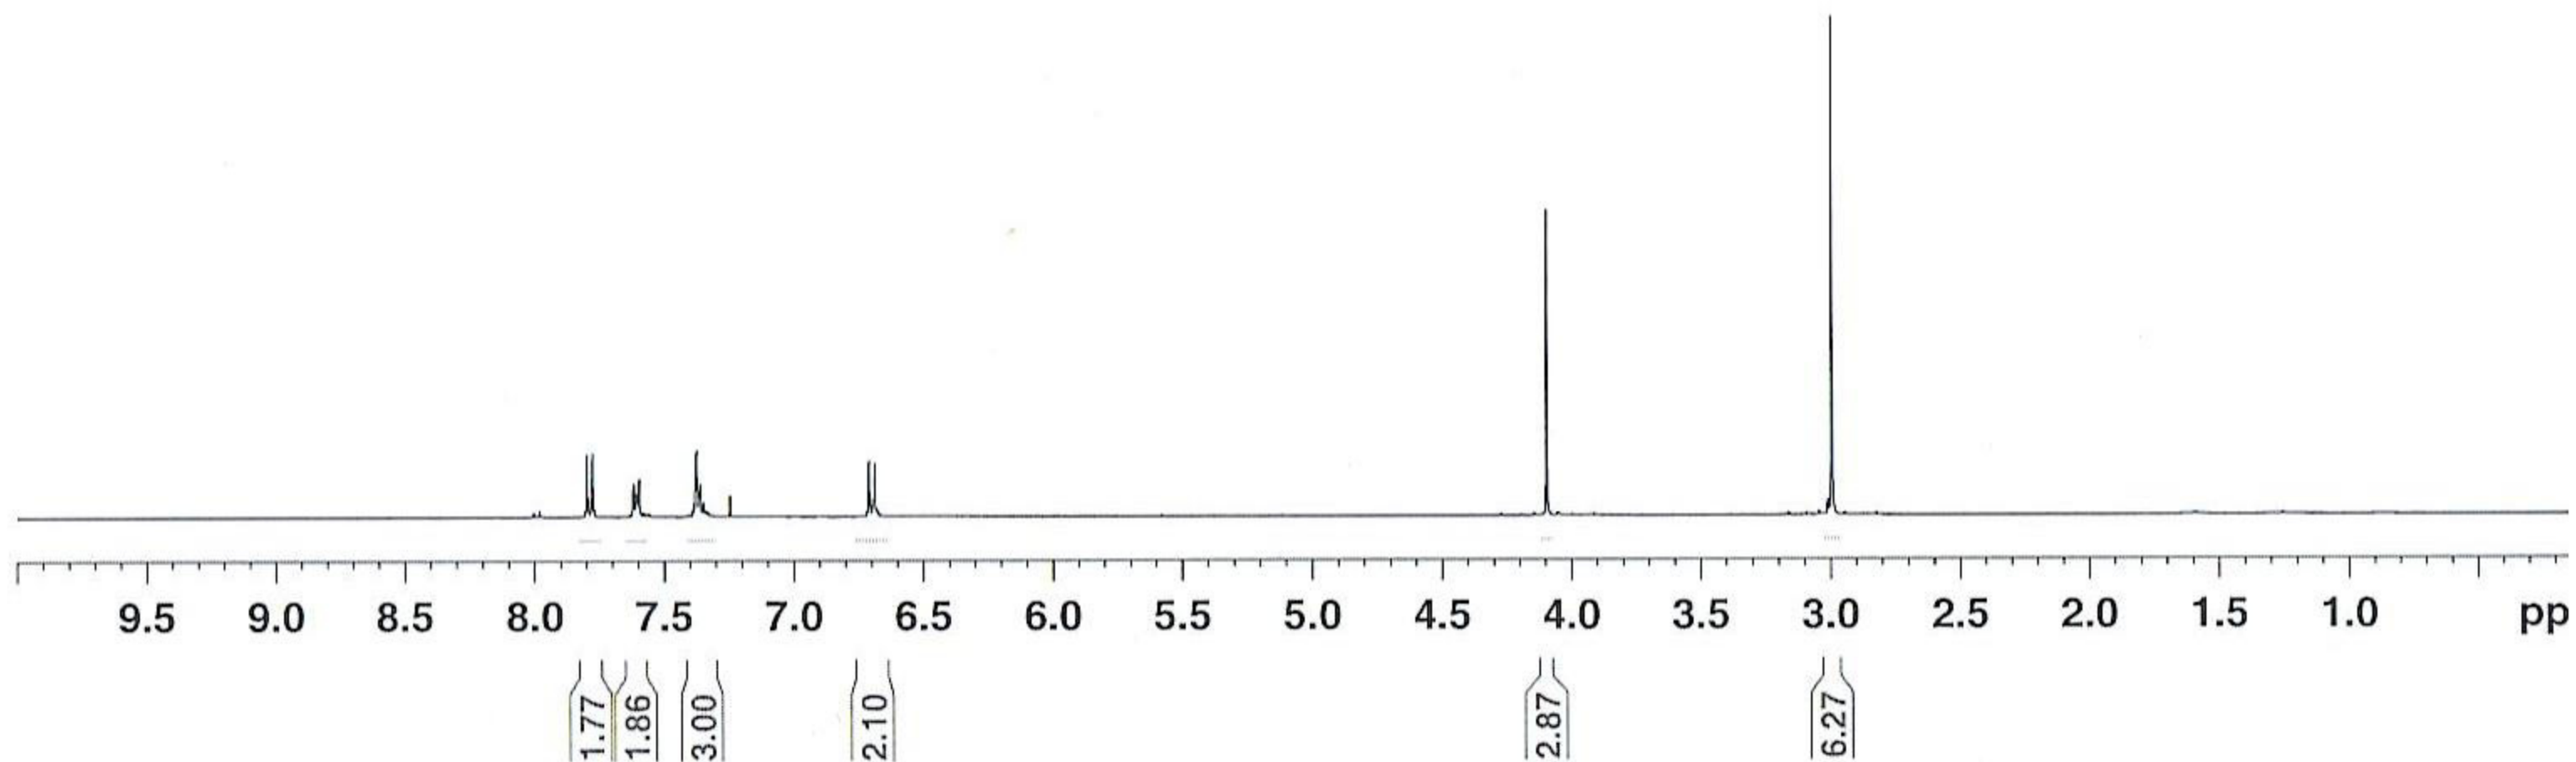

151.614  
140.324  
132.367  
129.531  
128.617  
127.825  
122.308  
111.909  
100.484  
80.158  
77.613  
77.295  
76.978  
63.033  
40.553

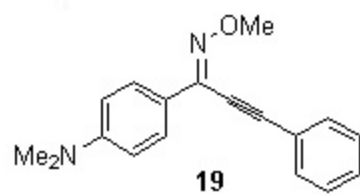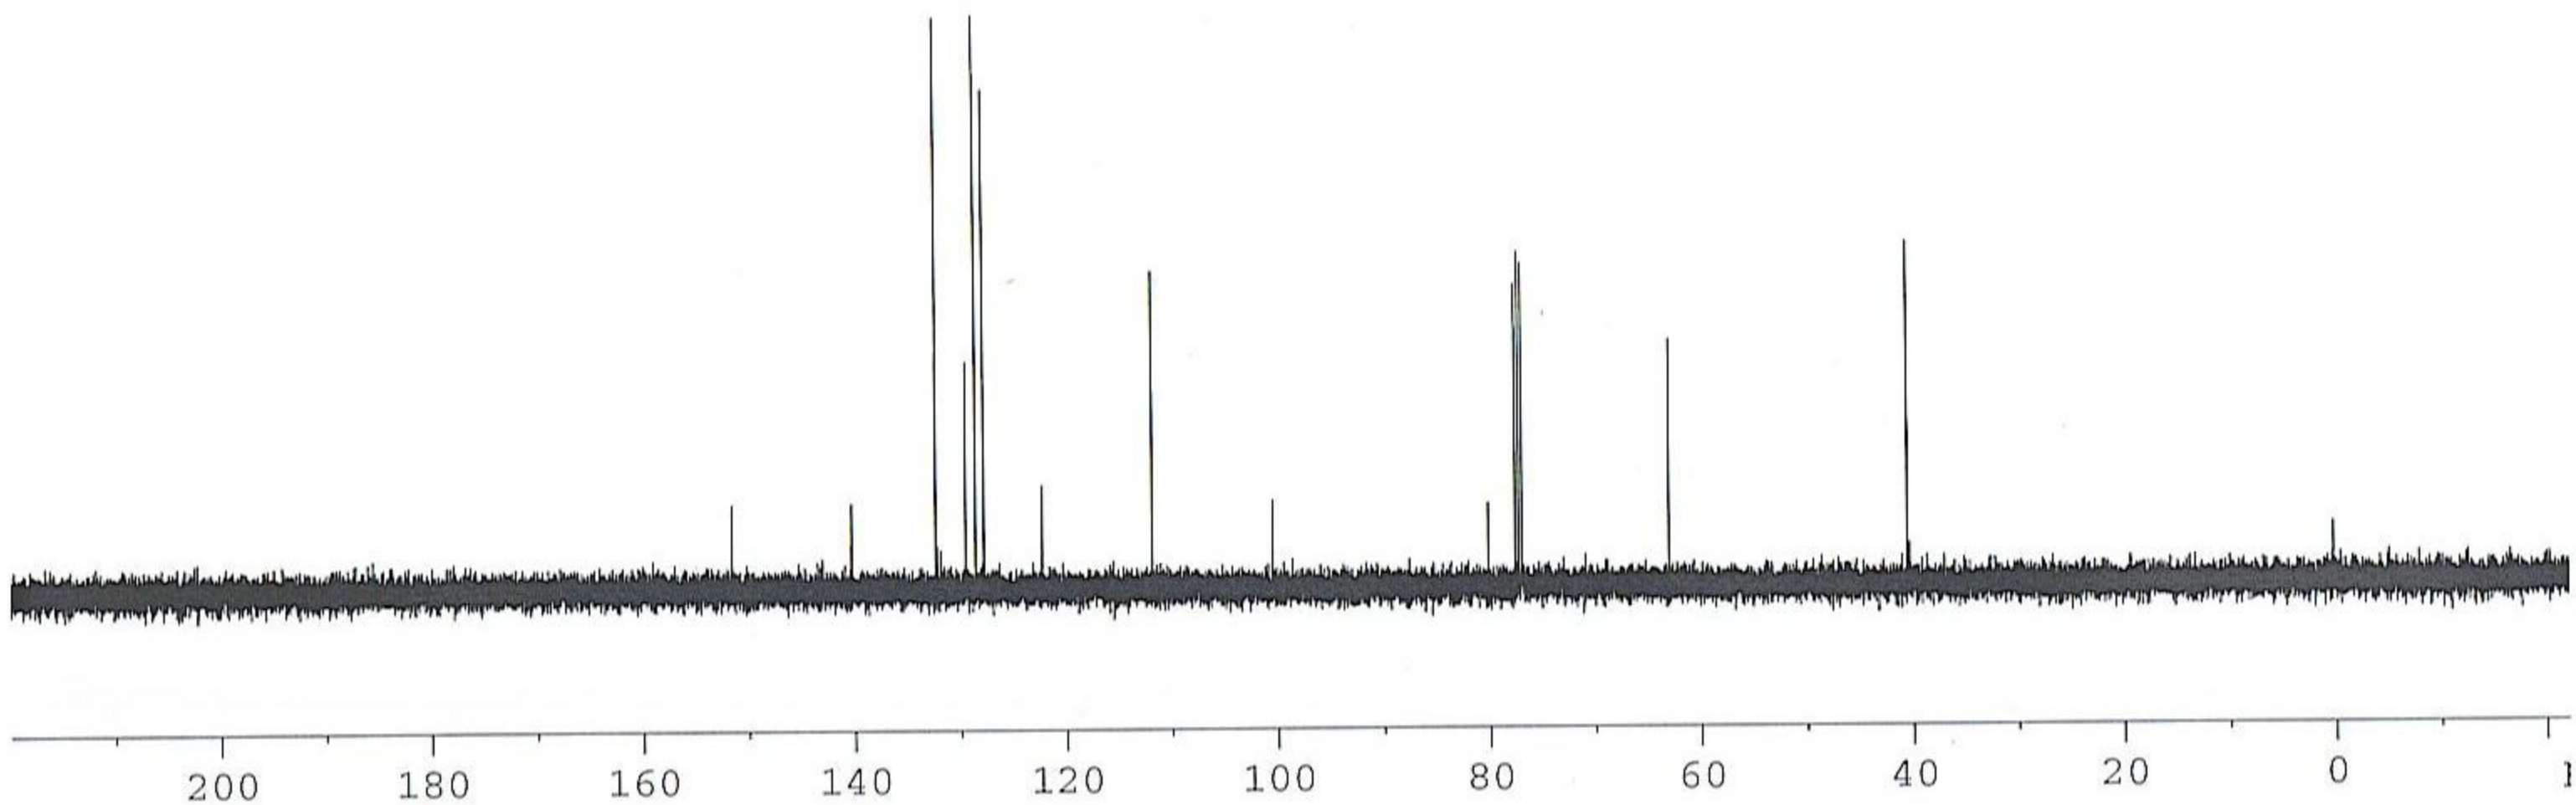

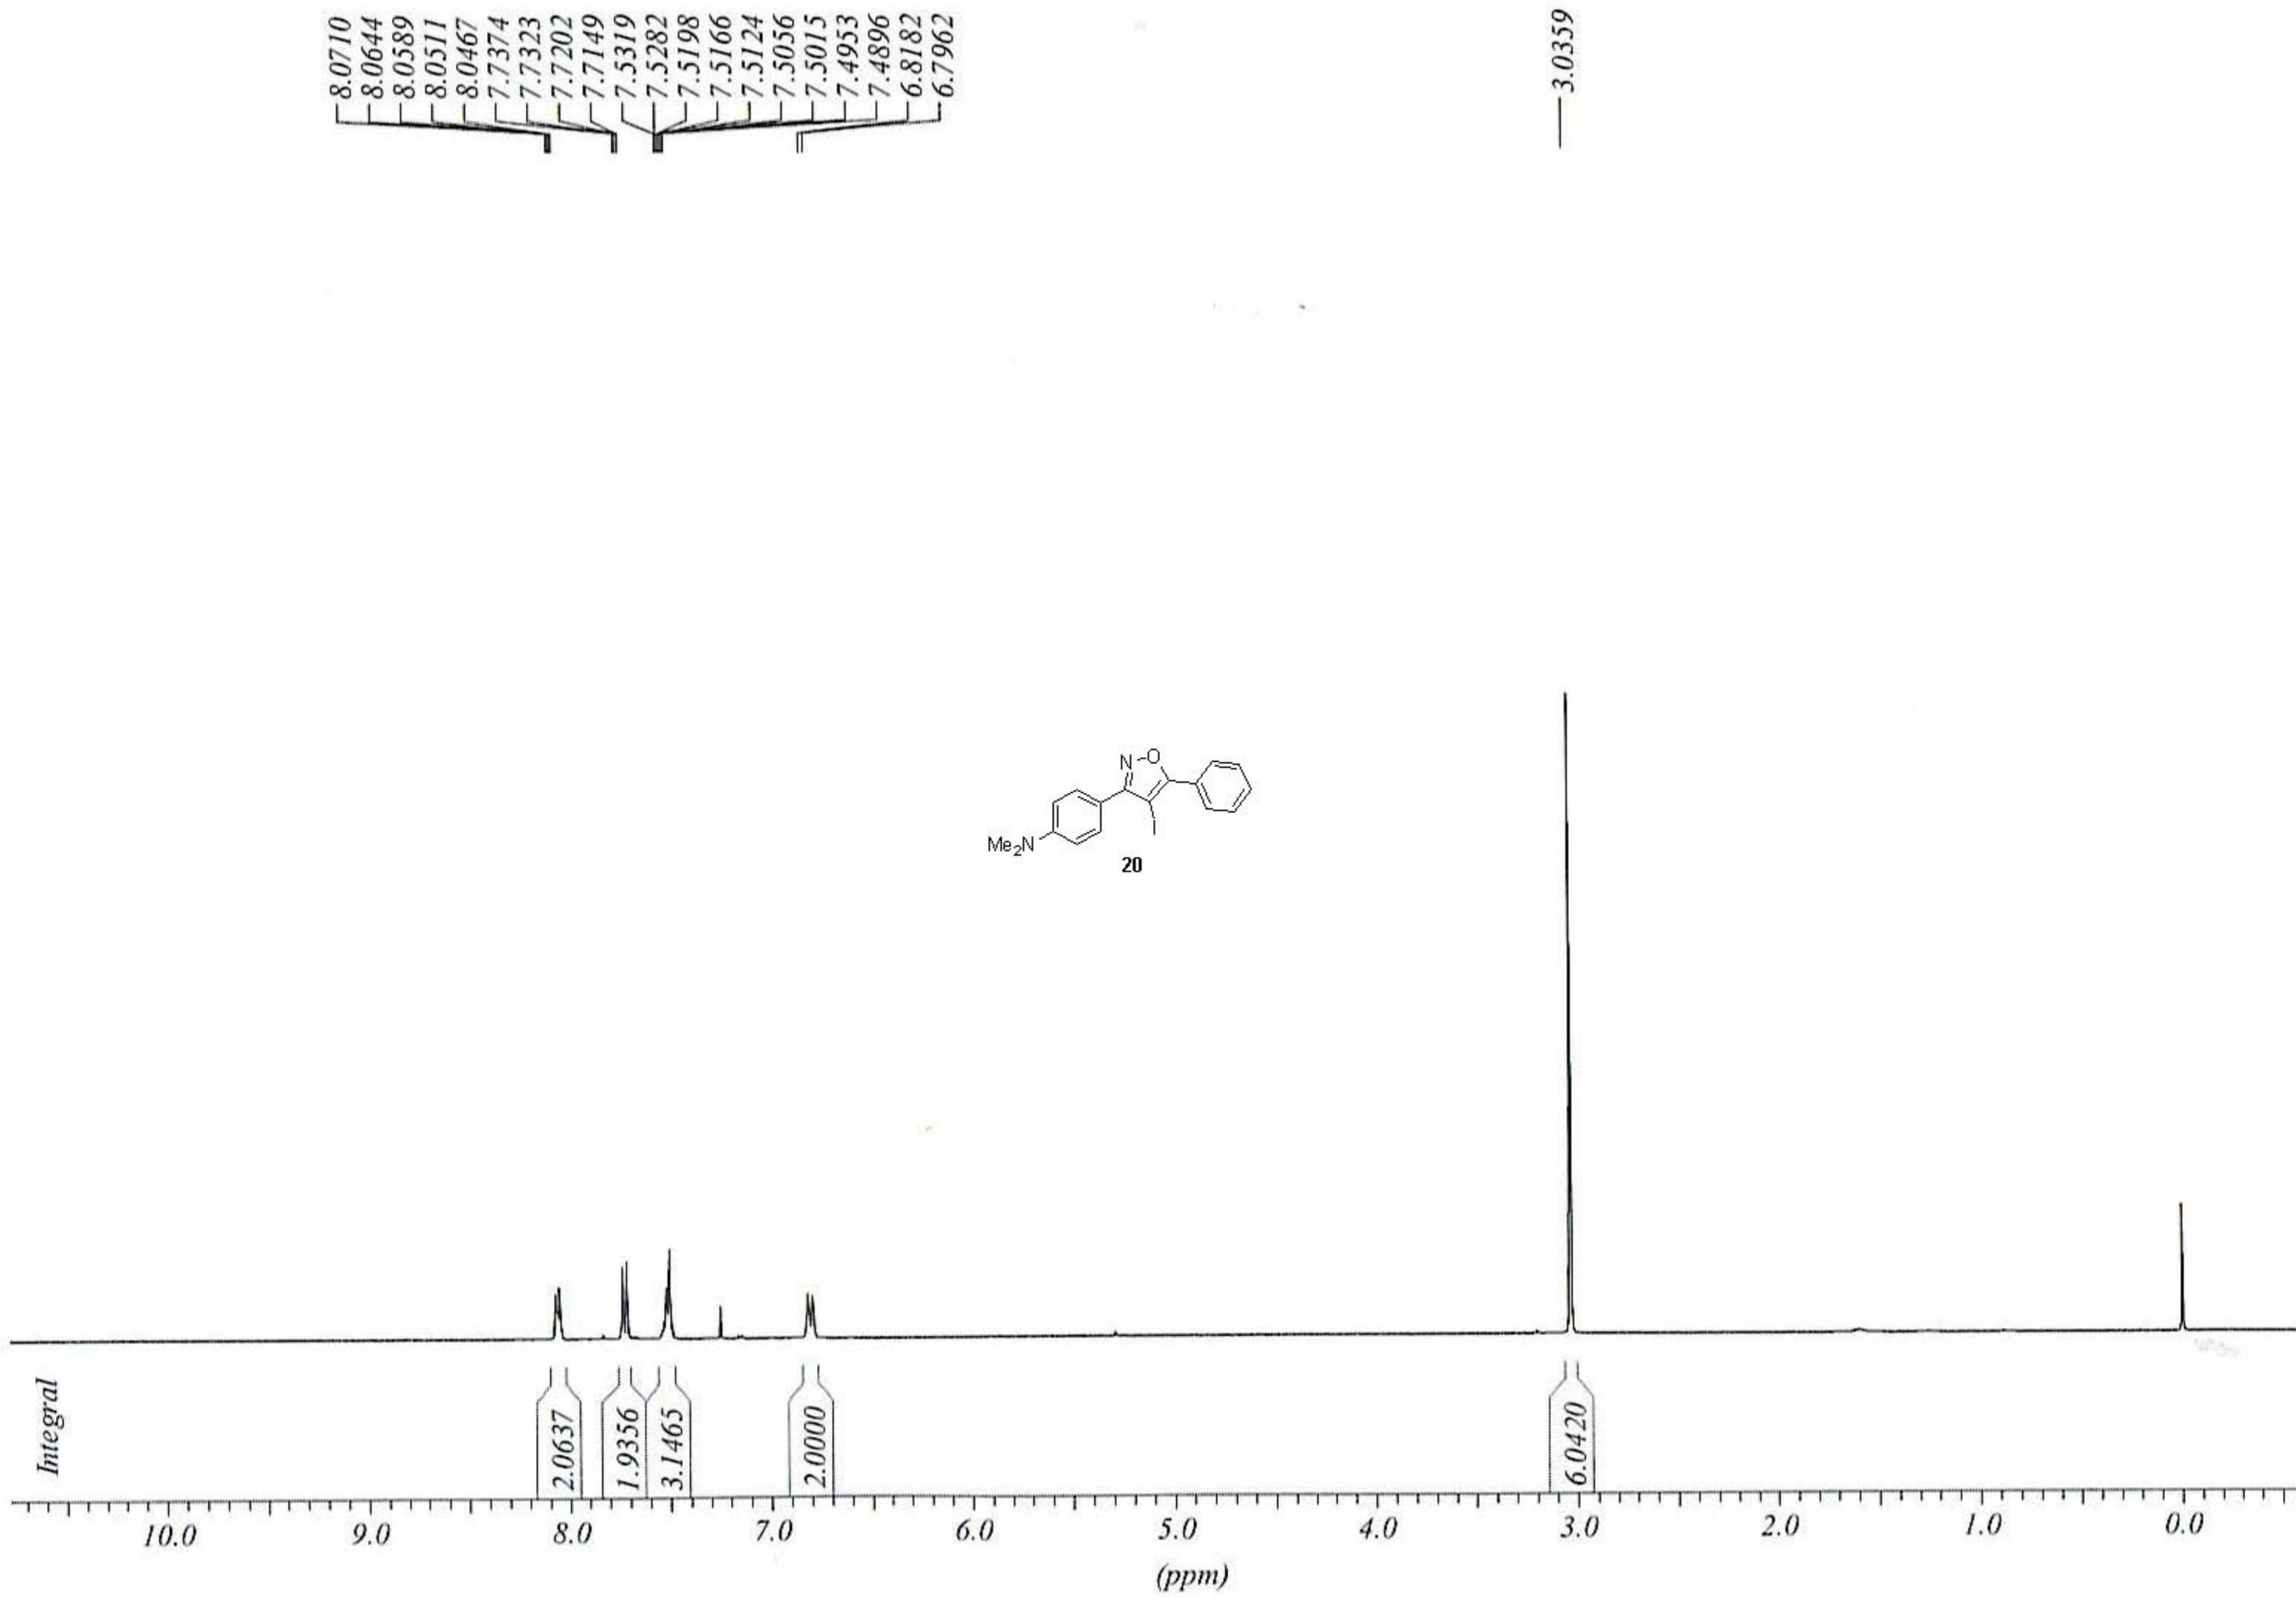

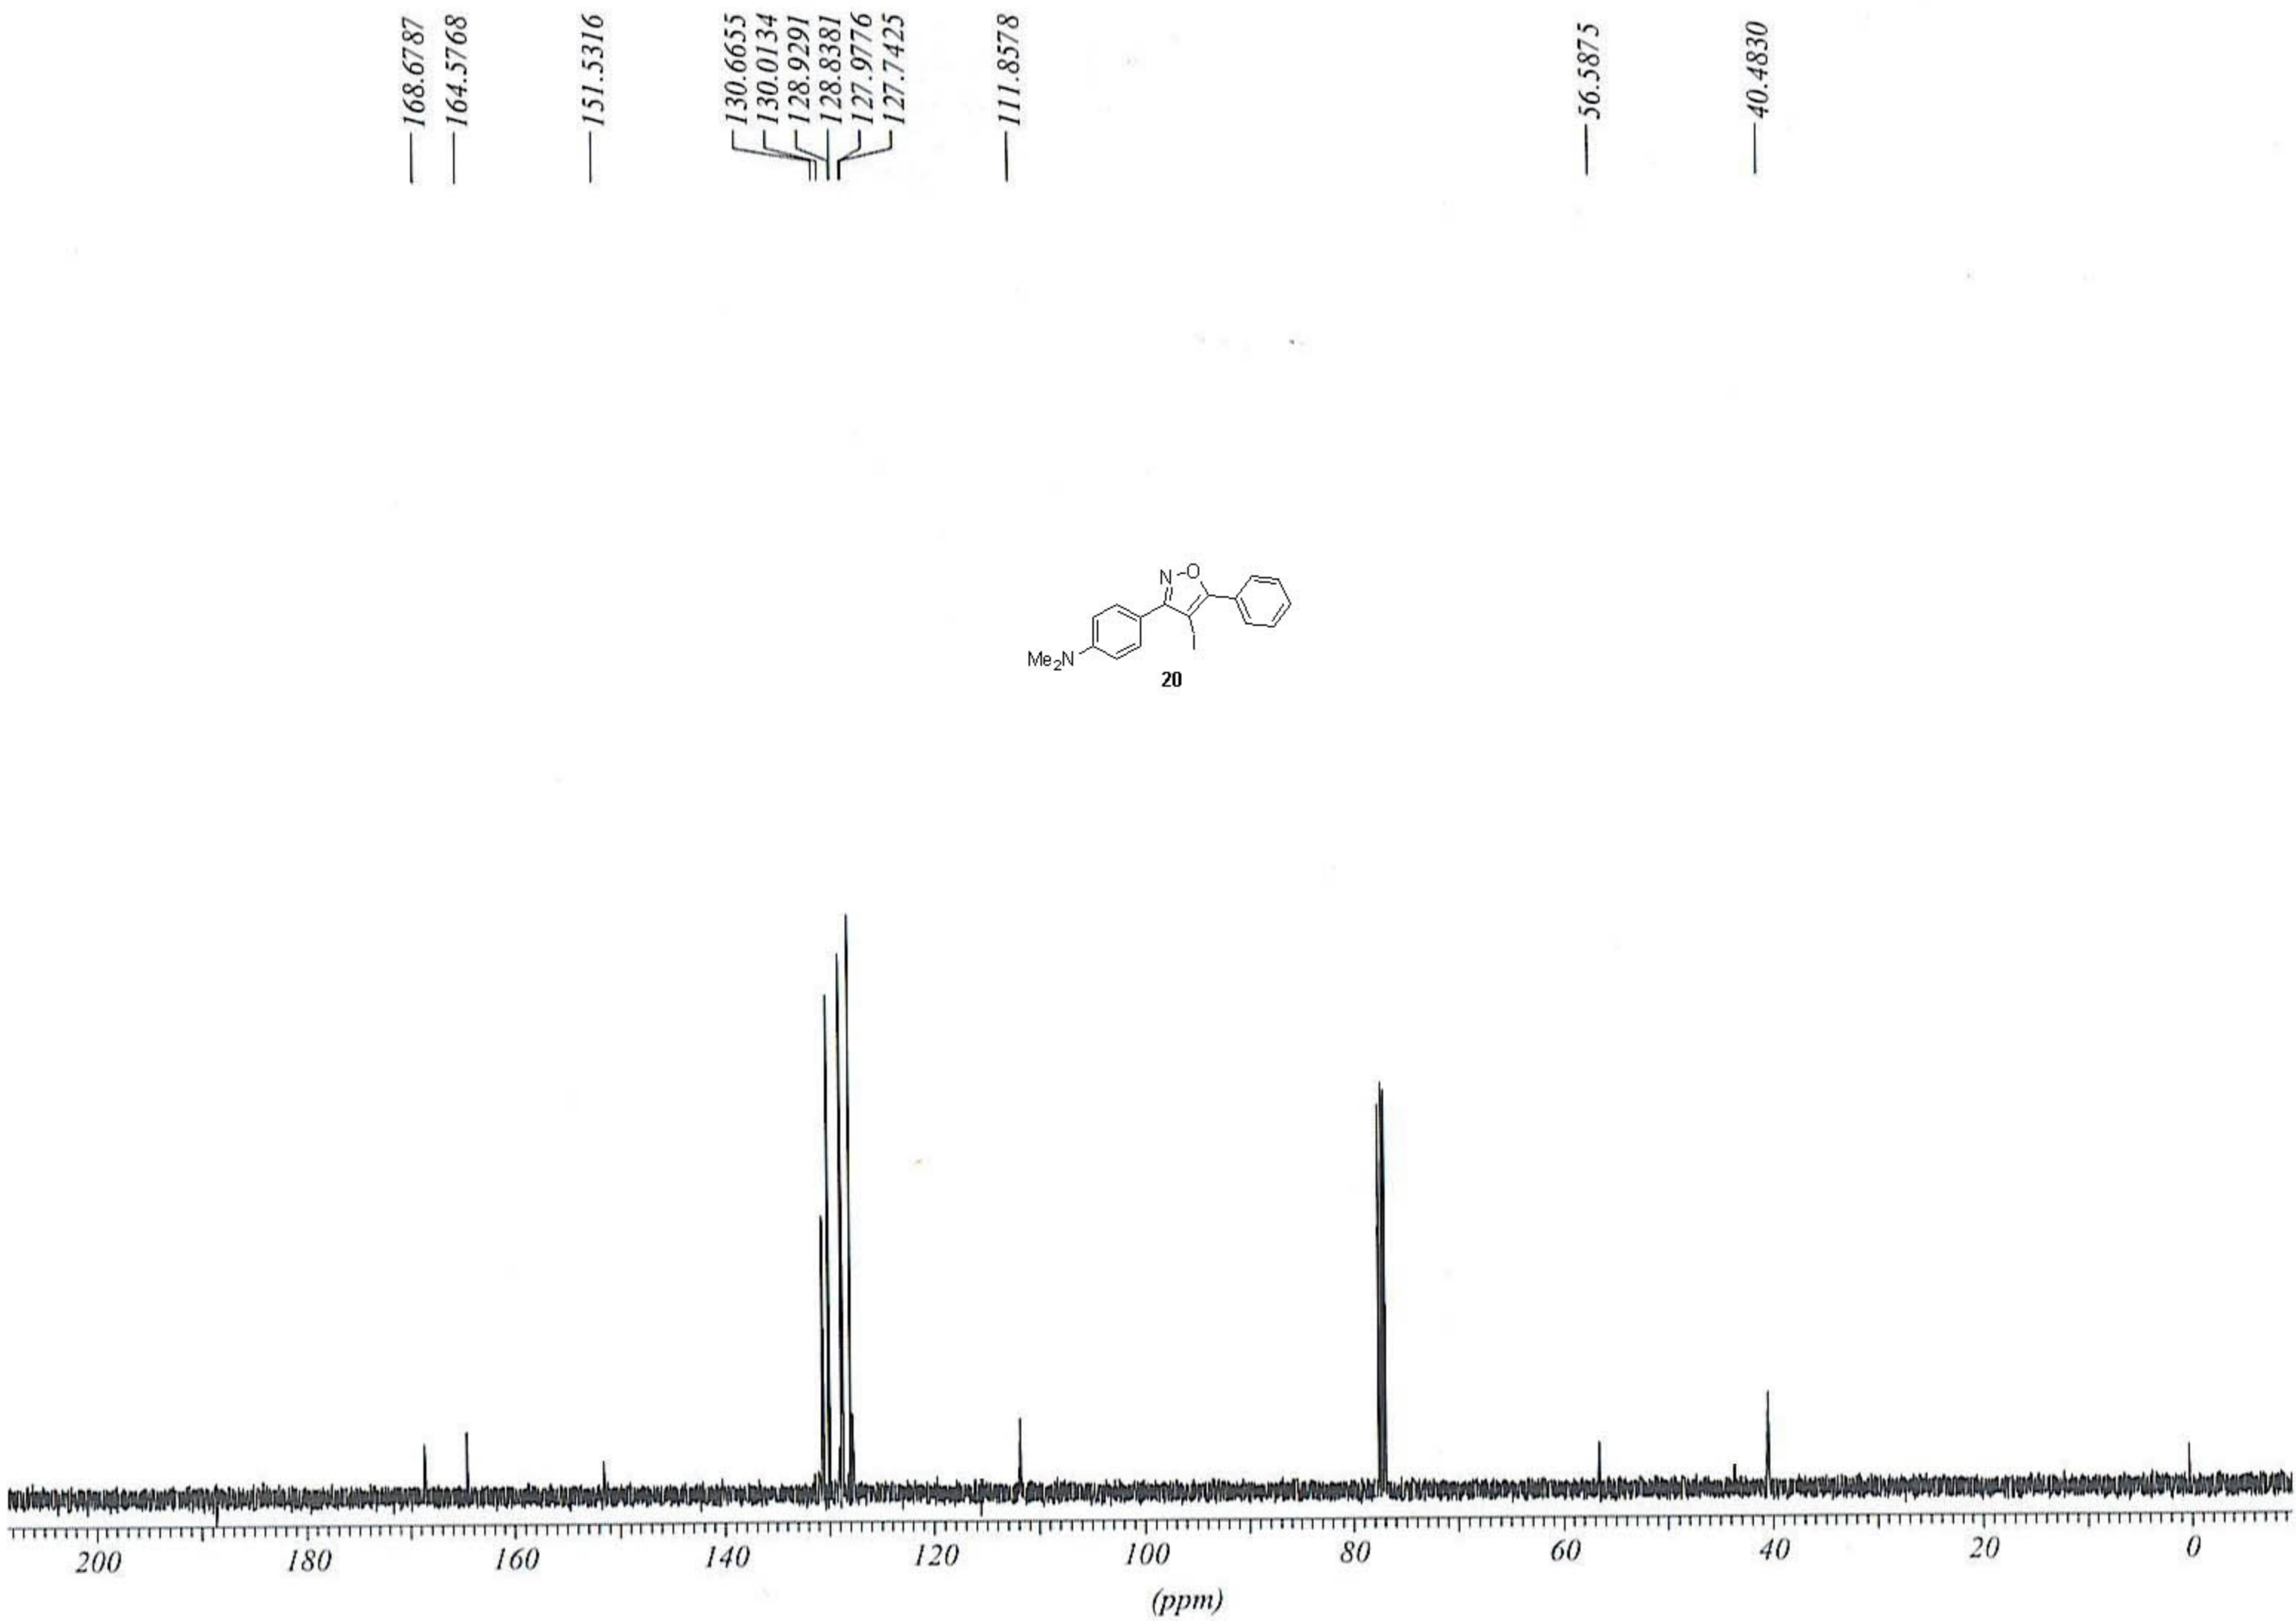

7.5409  
7.5352  
7.5185  
7.5104  
7.5088  
7.3623  
7.3610  
7.3545  
7.3423  
7.3399  
7.3378  
7.2609

— 3.9701

— 2.1305

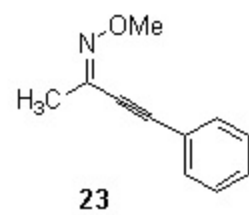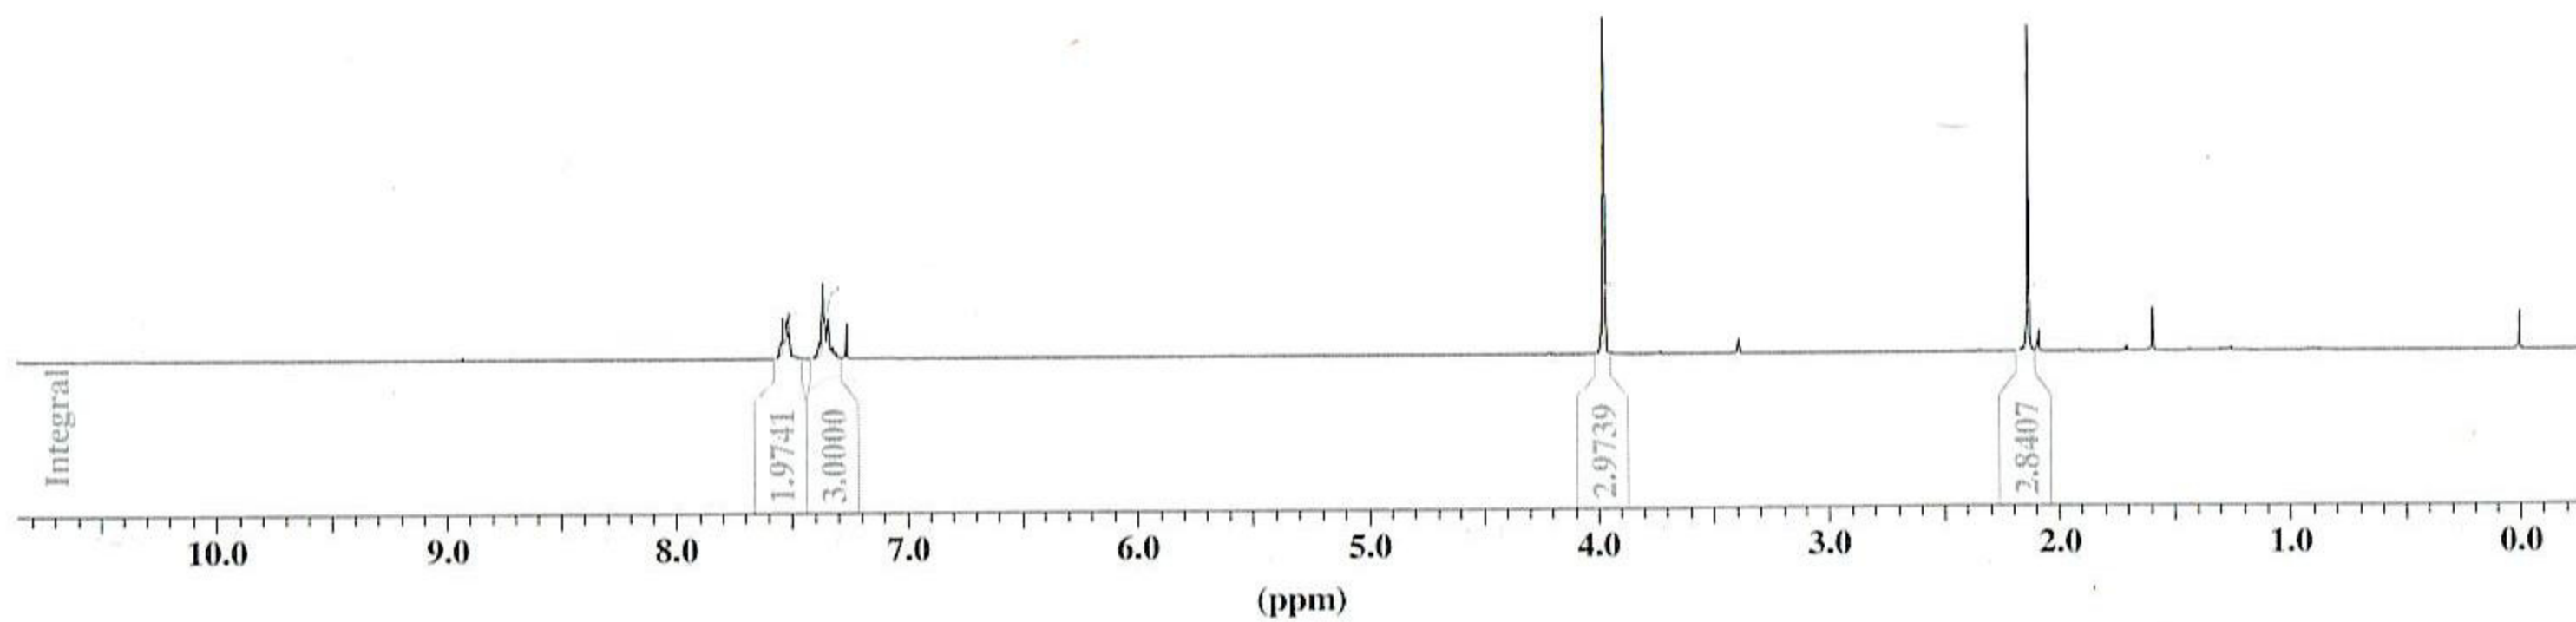

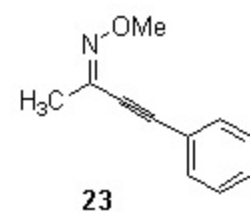

137.7615  
132.3158  
129.6197  
128.5798  
121.9232  
99.3393  
81.1718  
77.6708  
77.2470  
76.8232  
62.5199  
20.8497

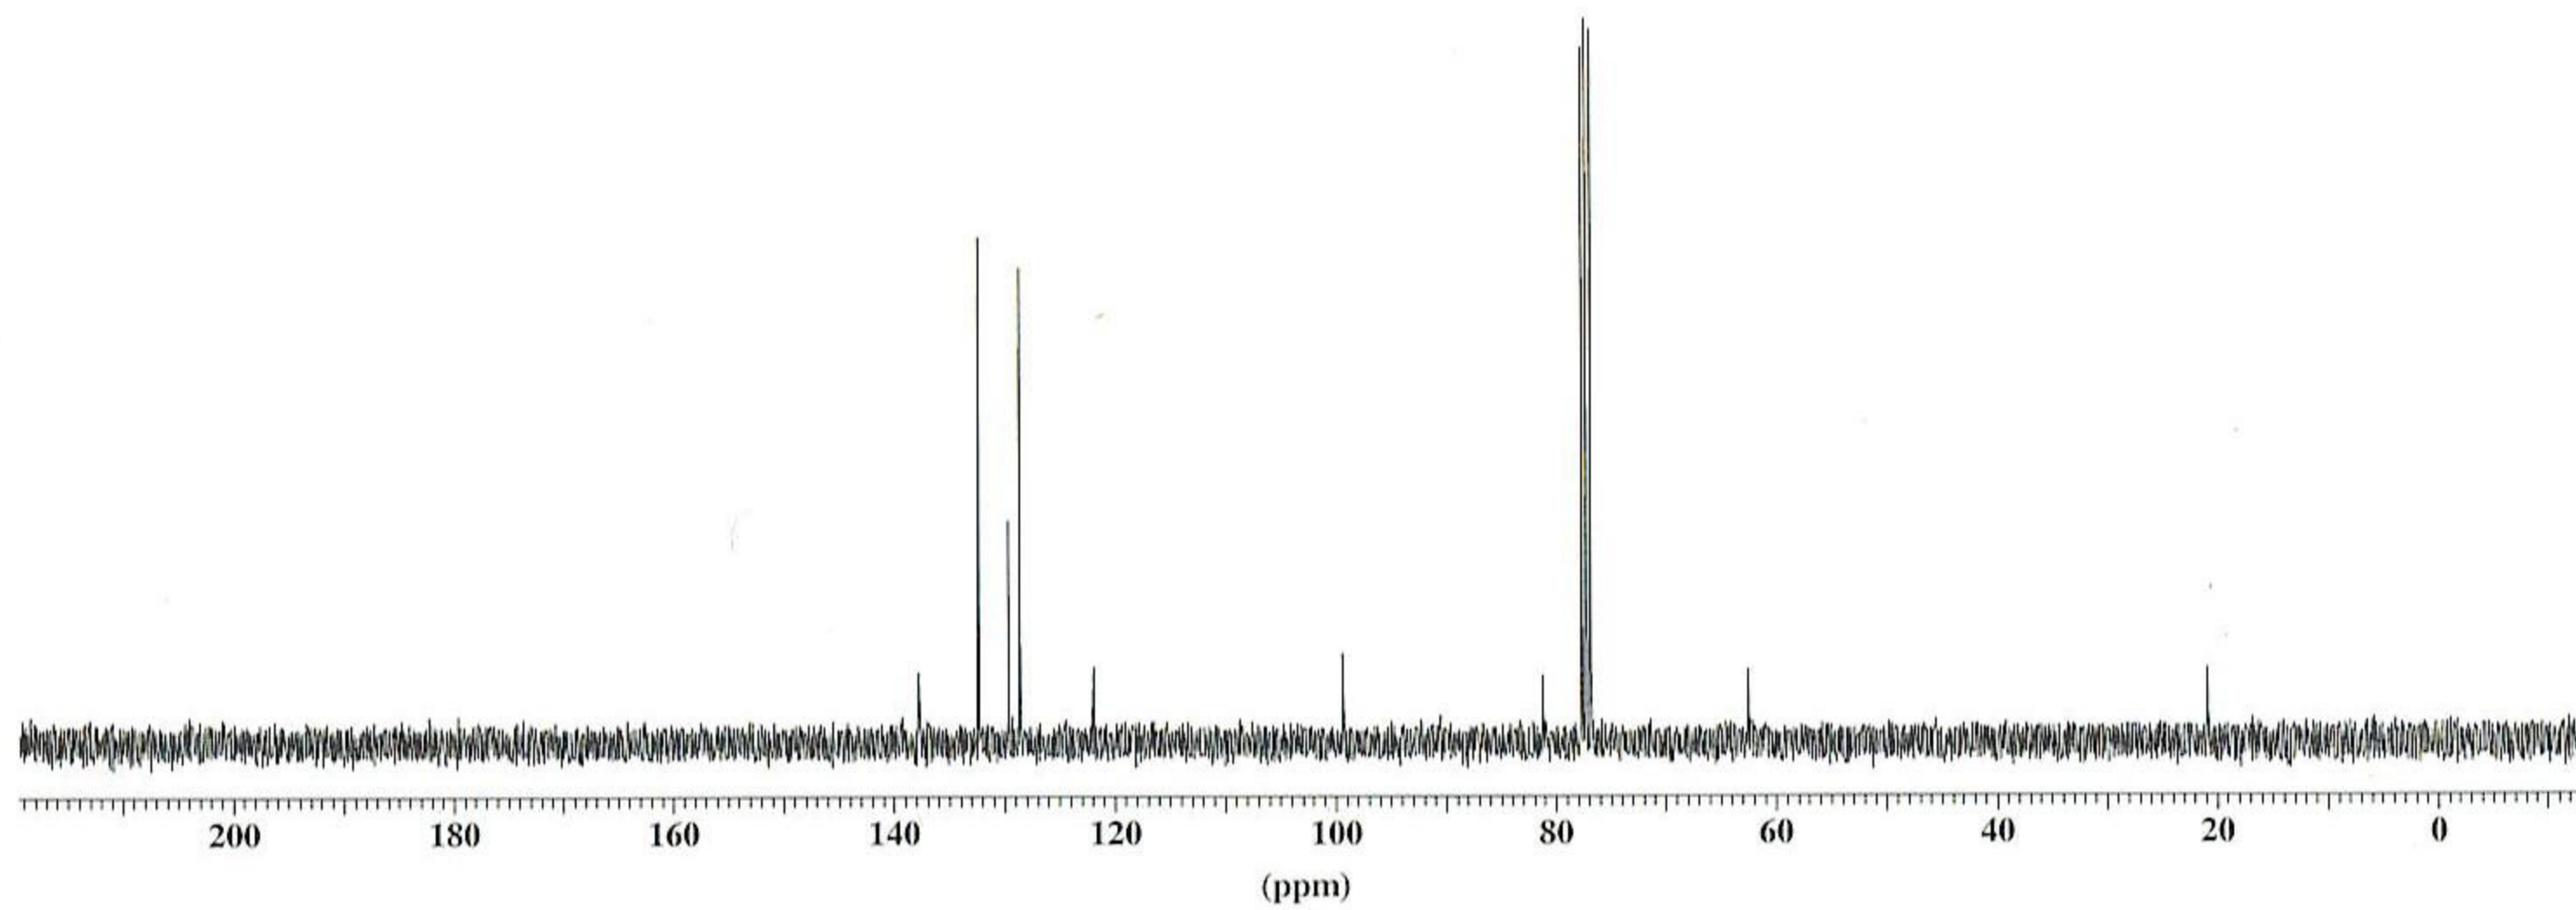

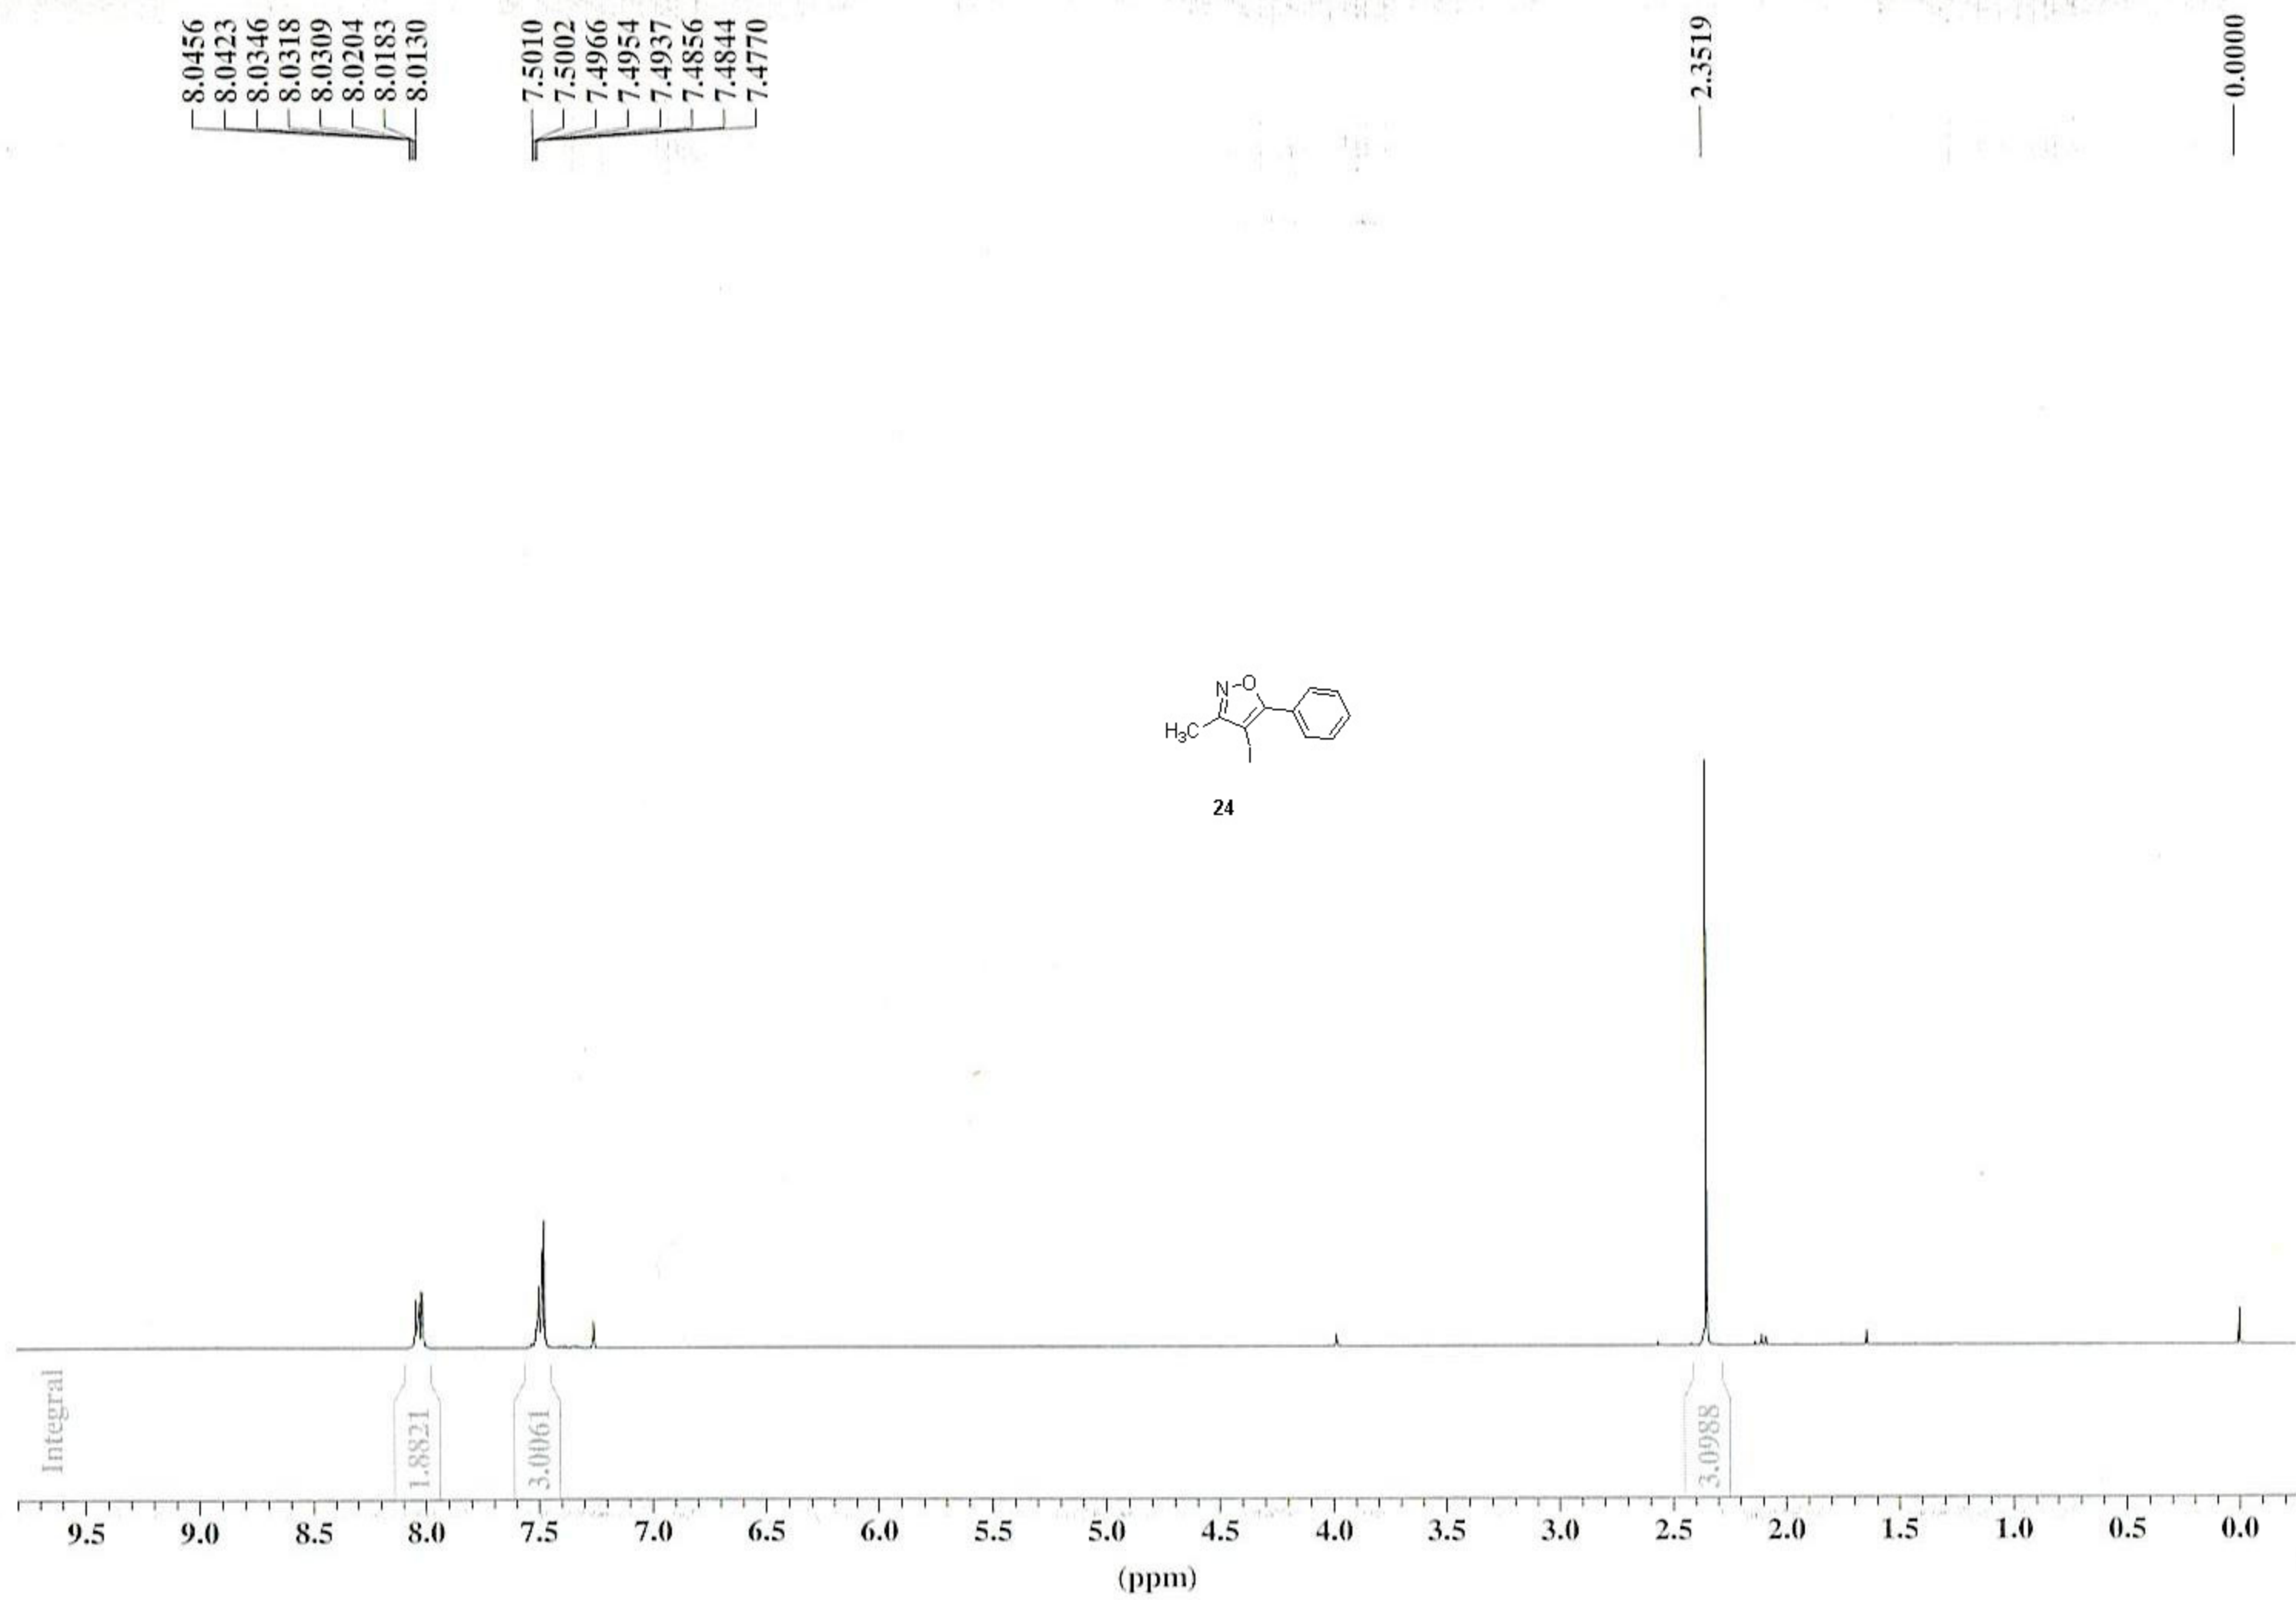



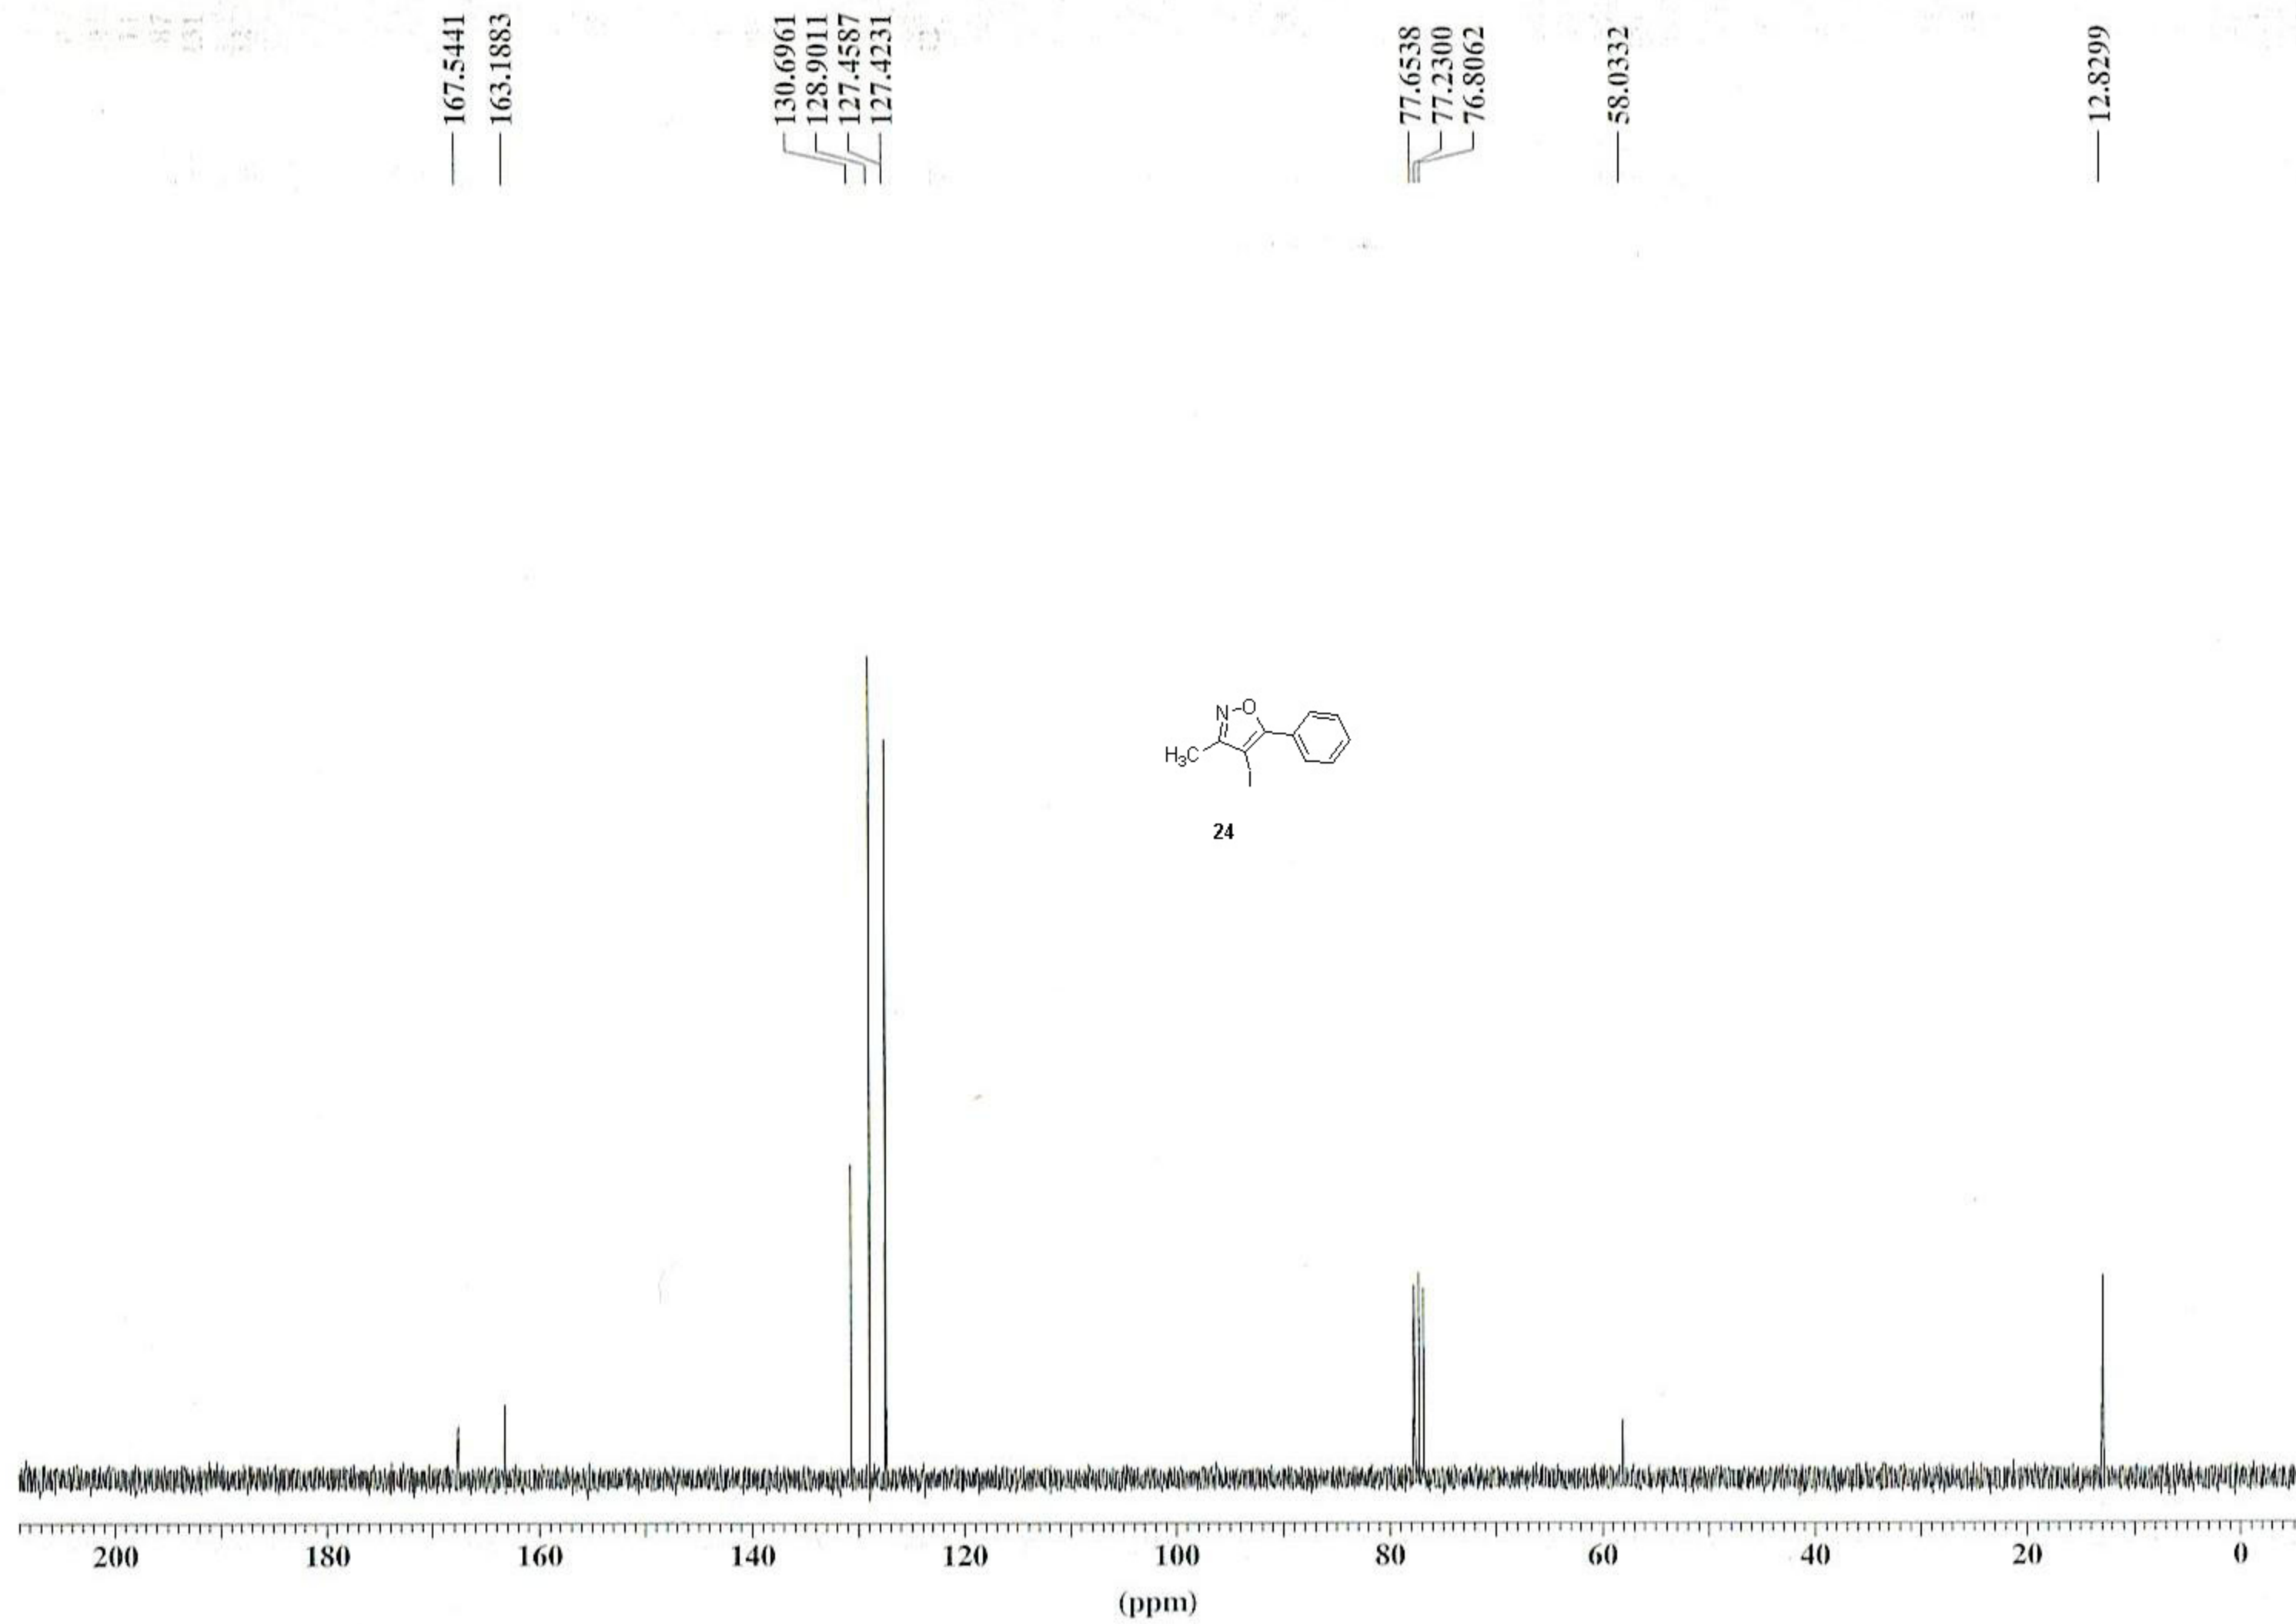

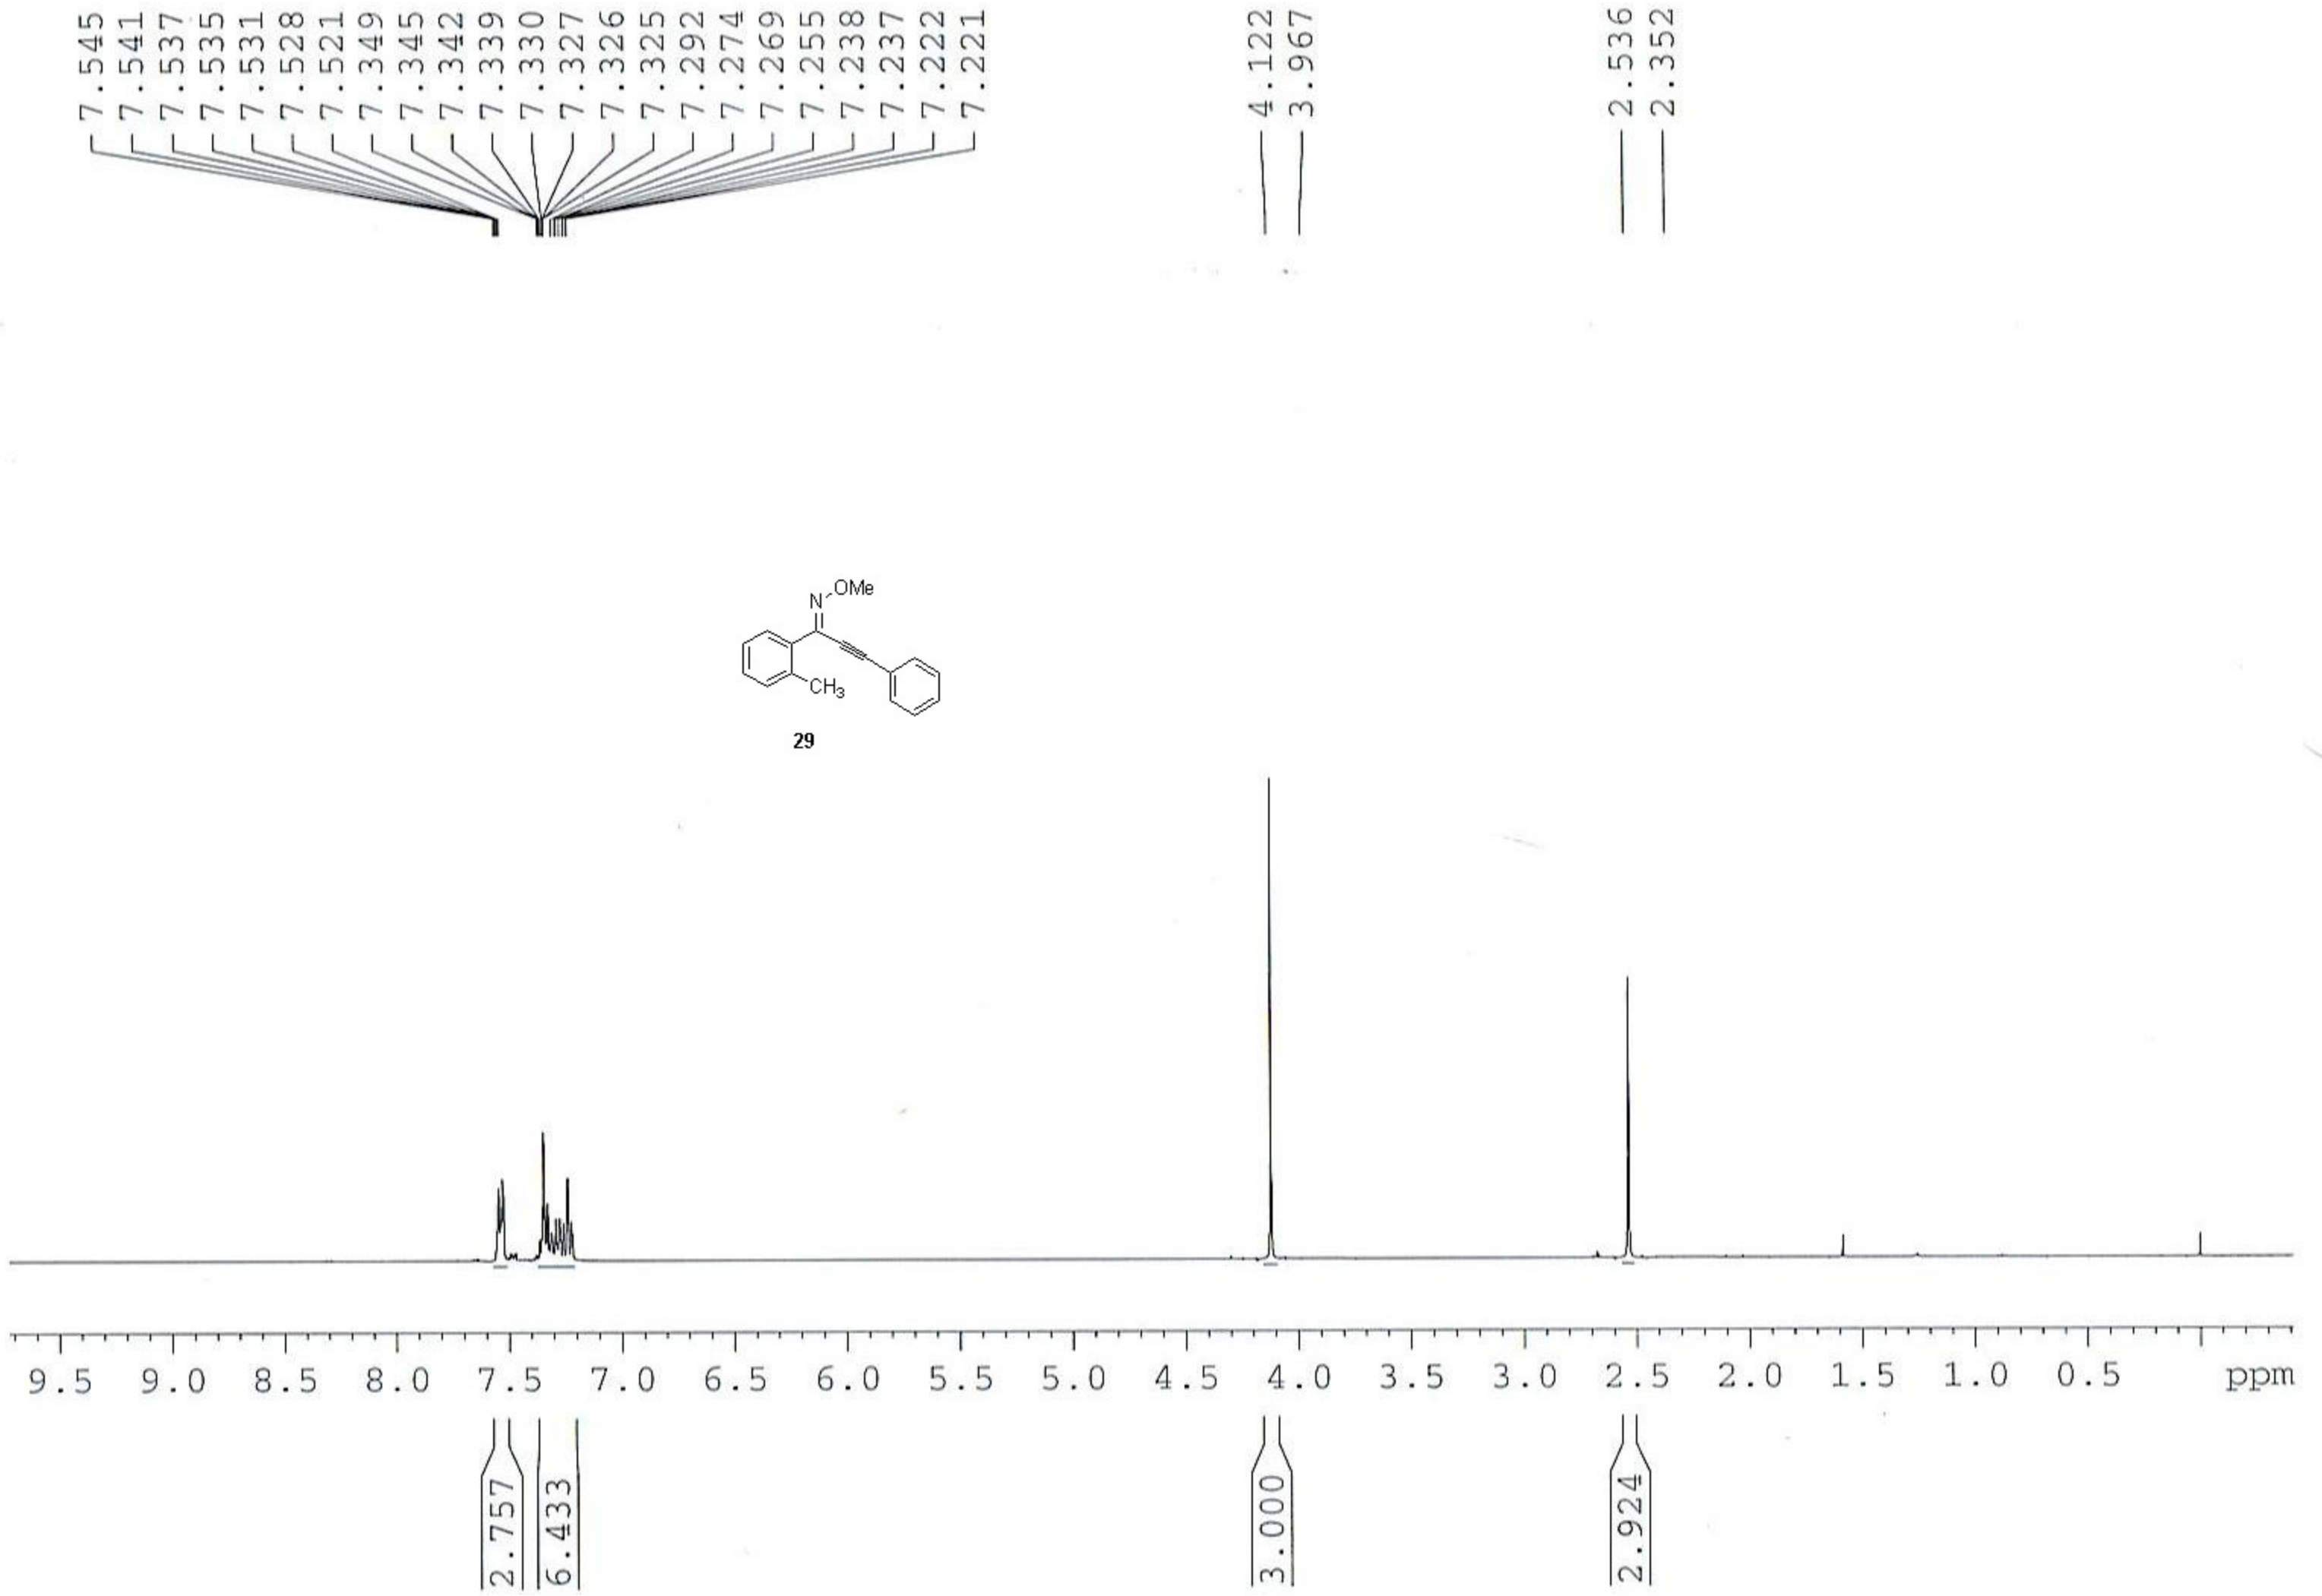

141.105  
137.072  
133.648  
132.321  
131.309  
129.755  
129.694  
129.435  
128.661  
126.225  
122.042

101.493

80.977  
77.659  
77.341  
77.023

63.288

21.096

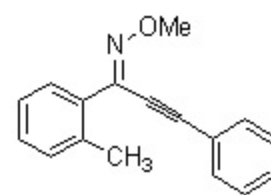

29

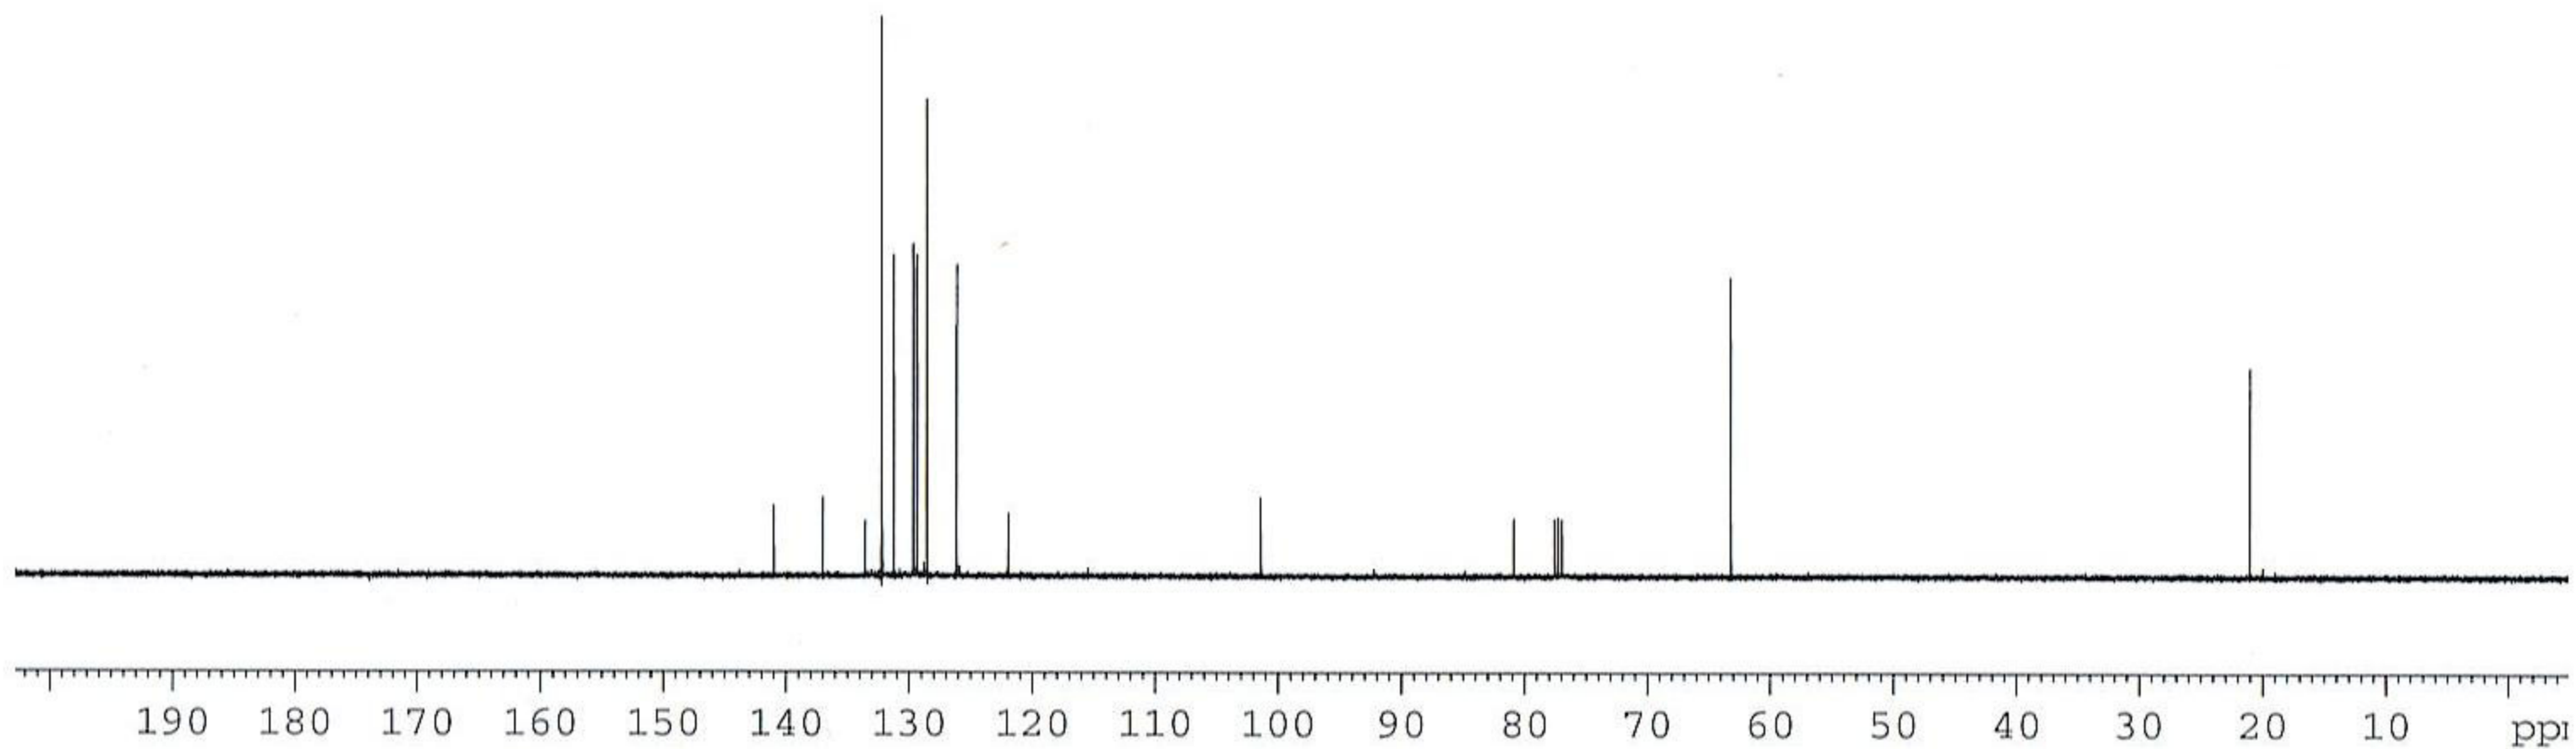

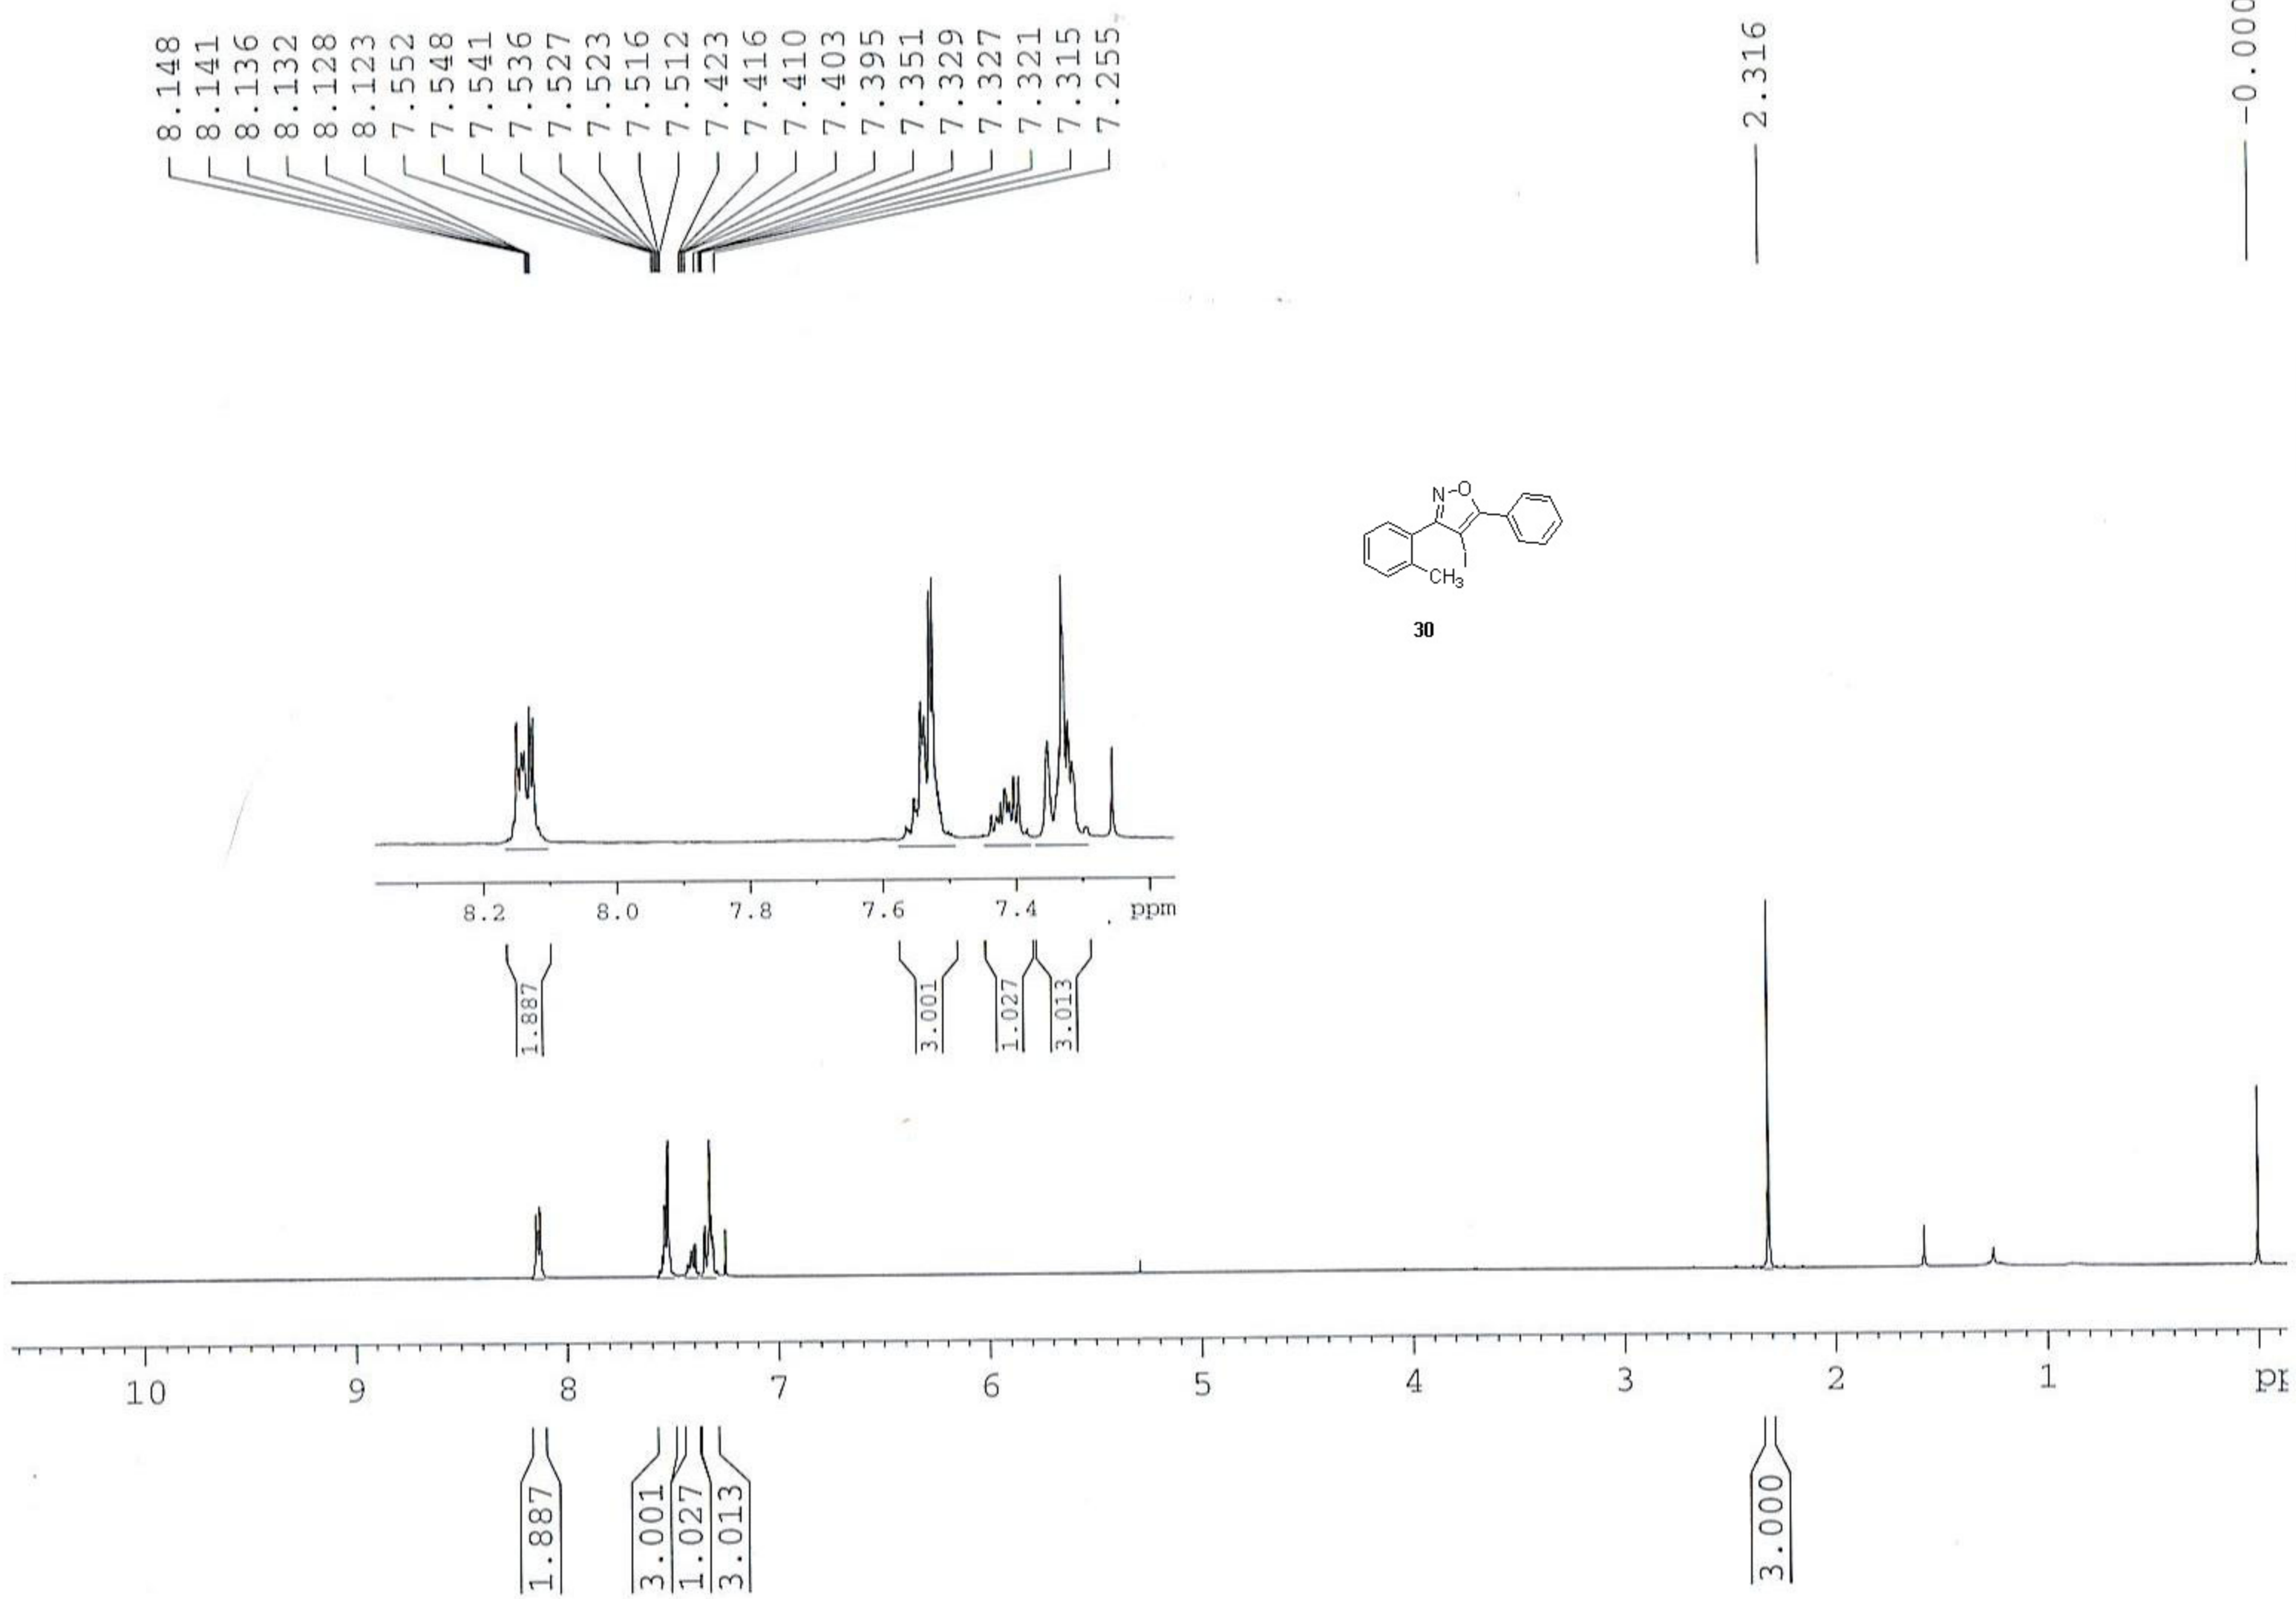

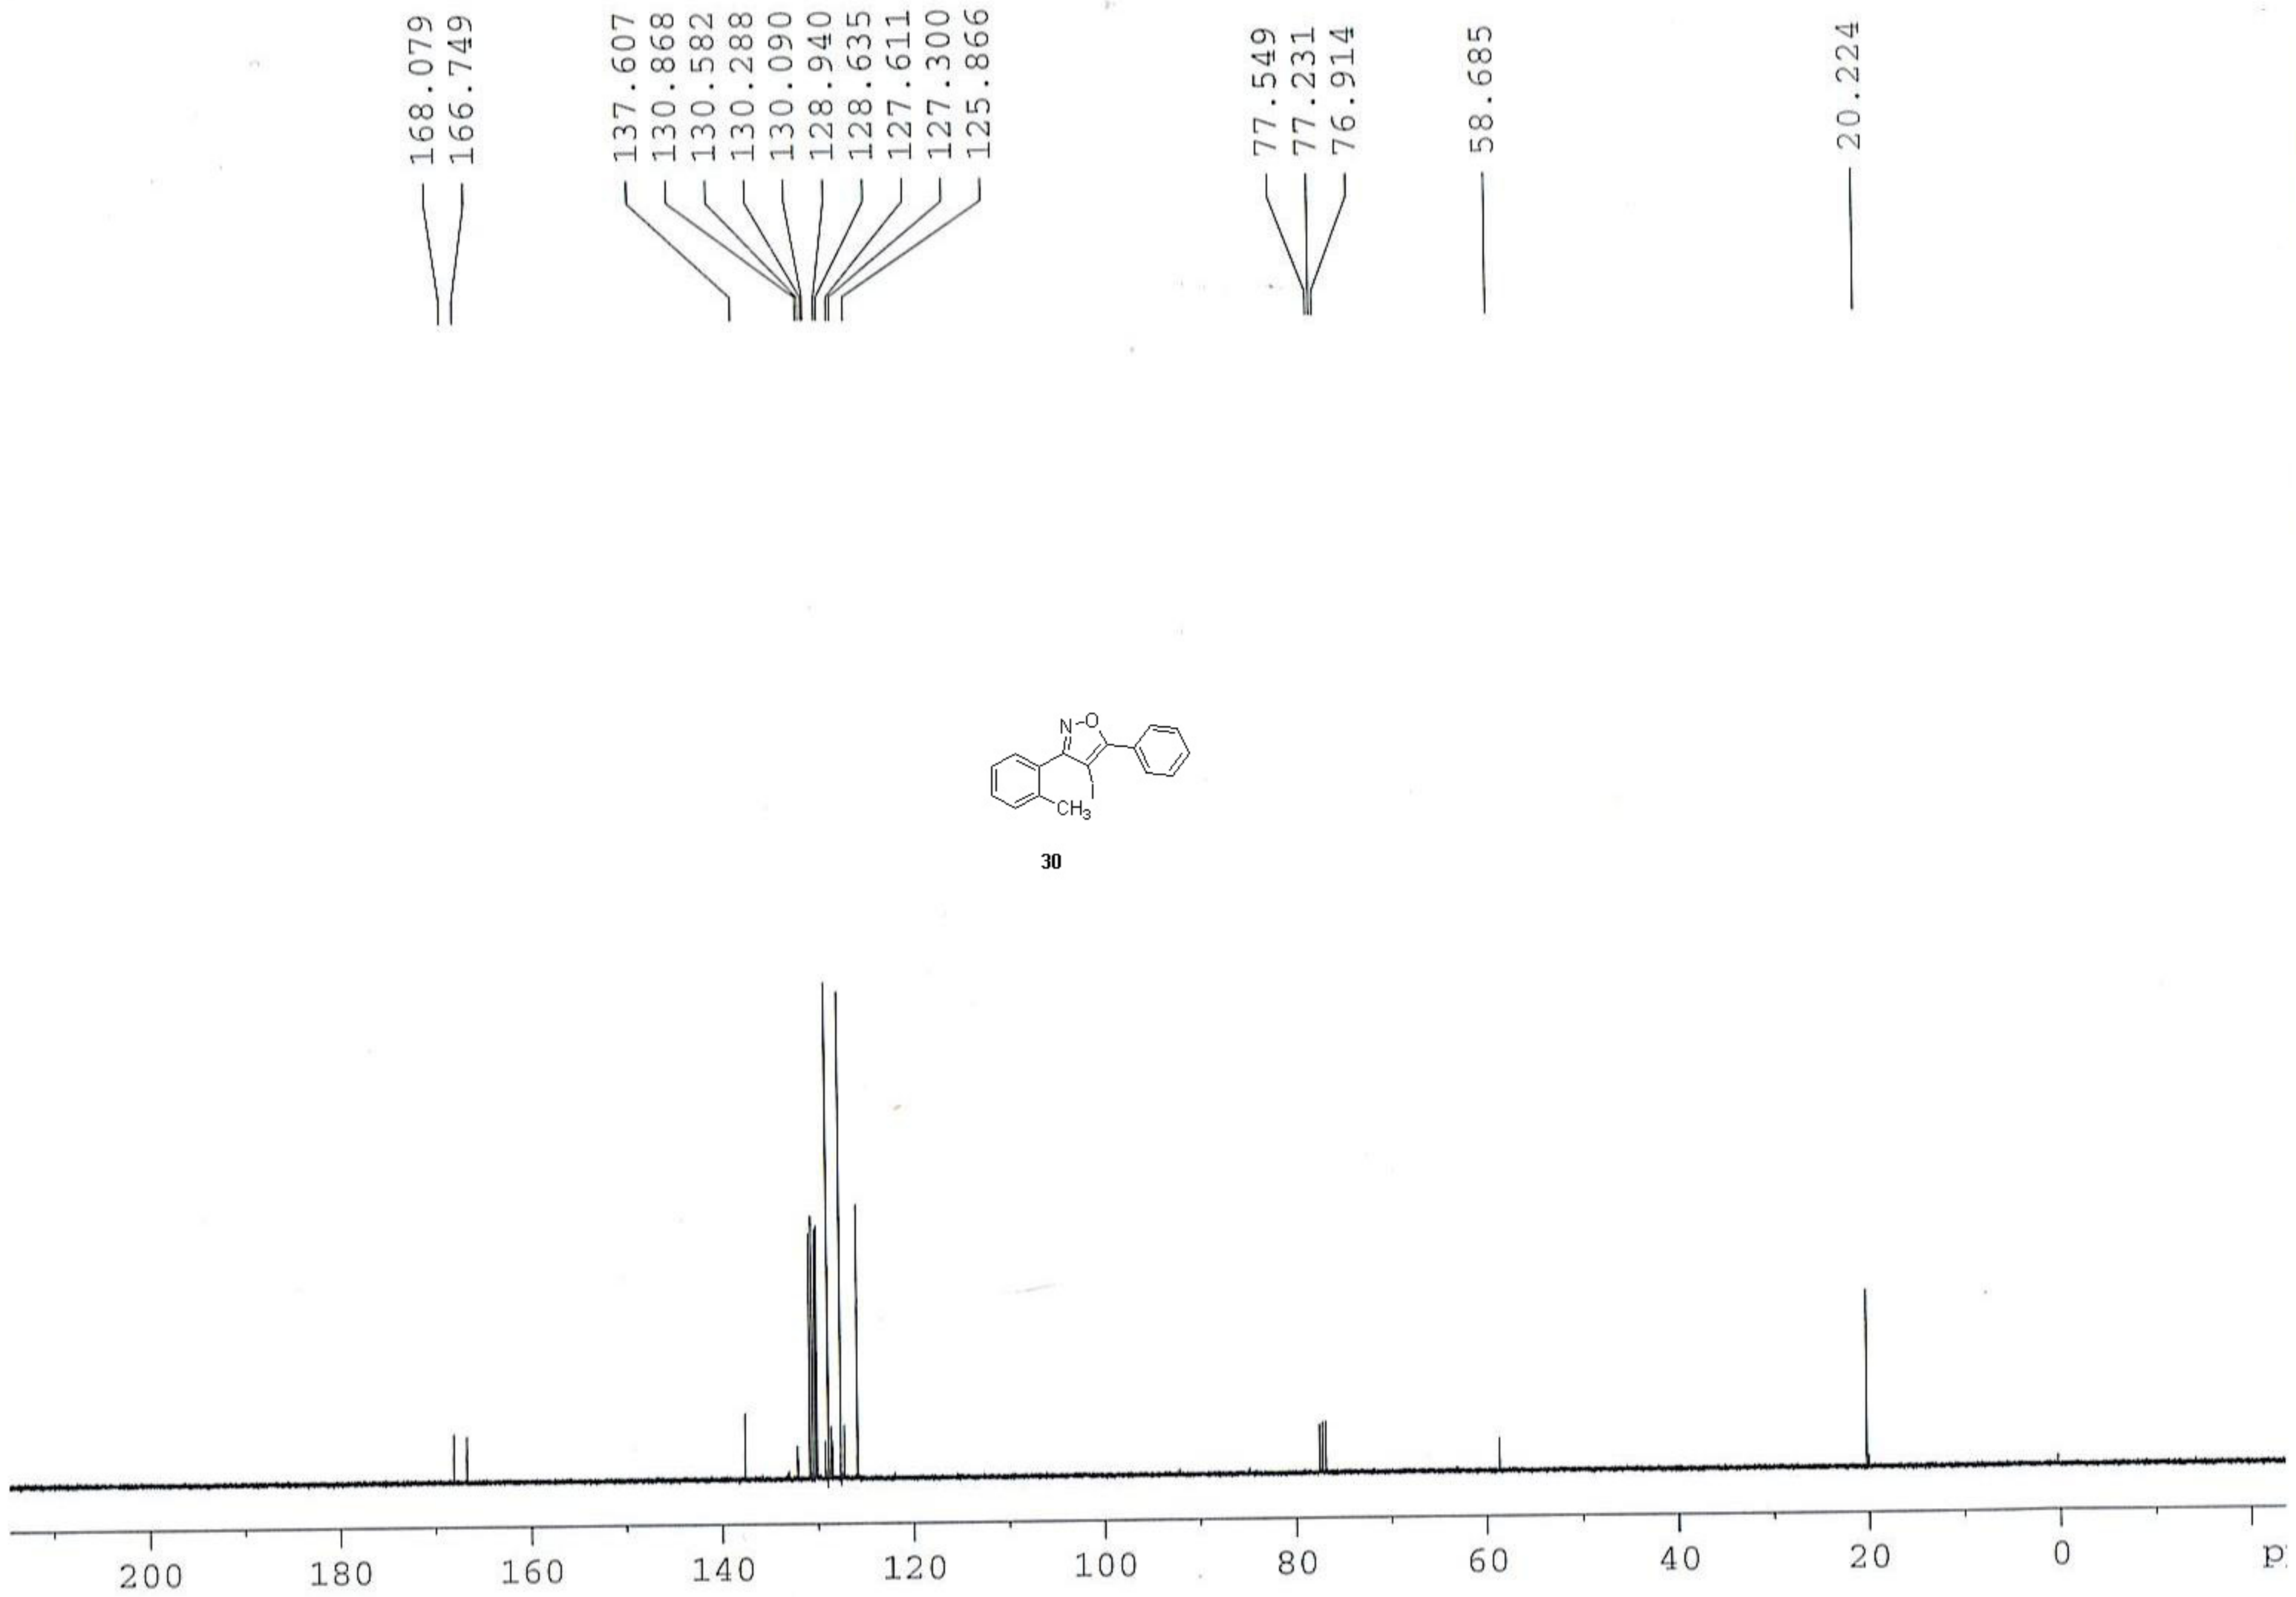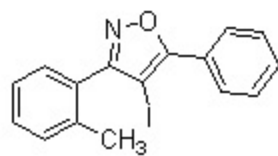

30

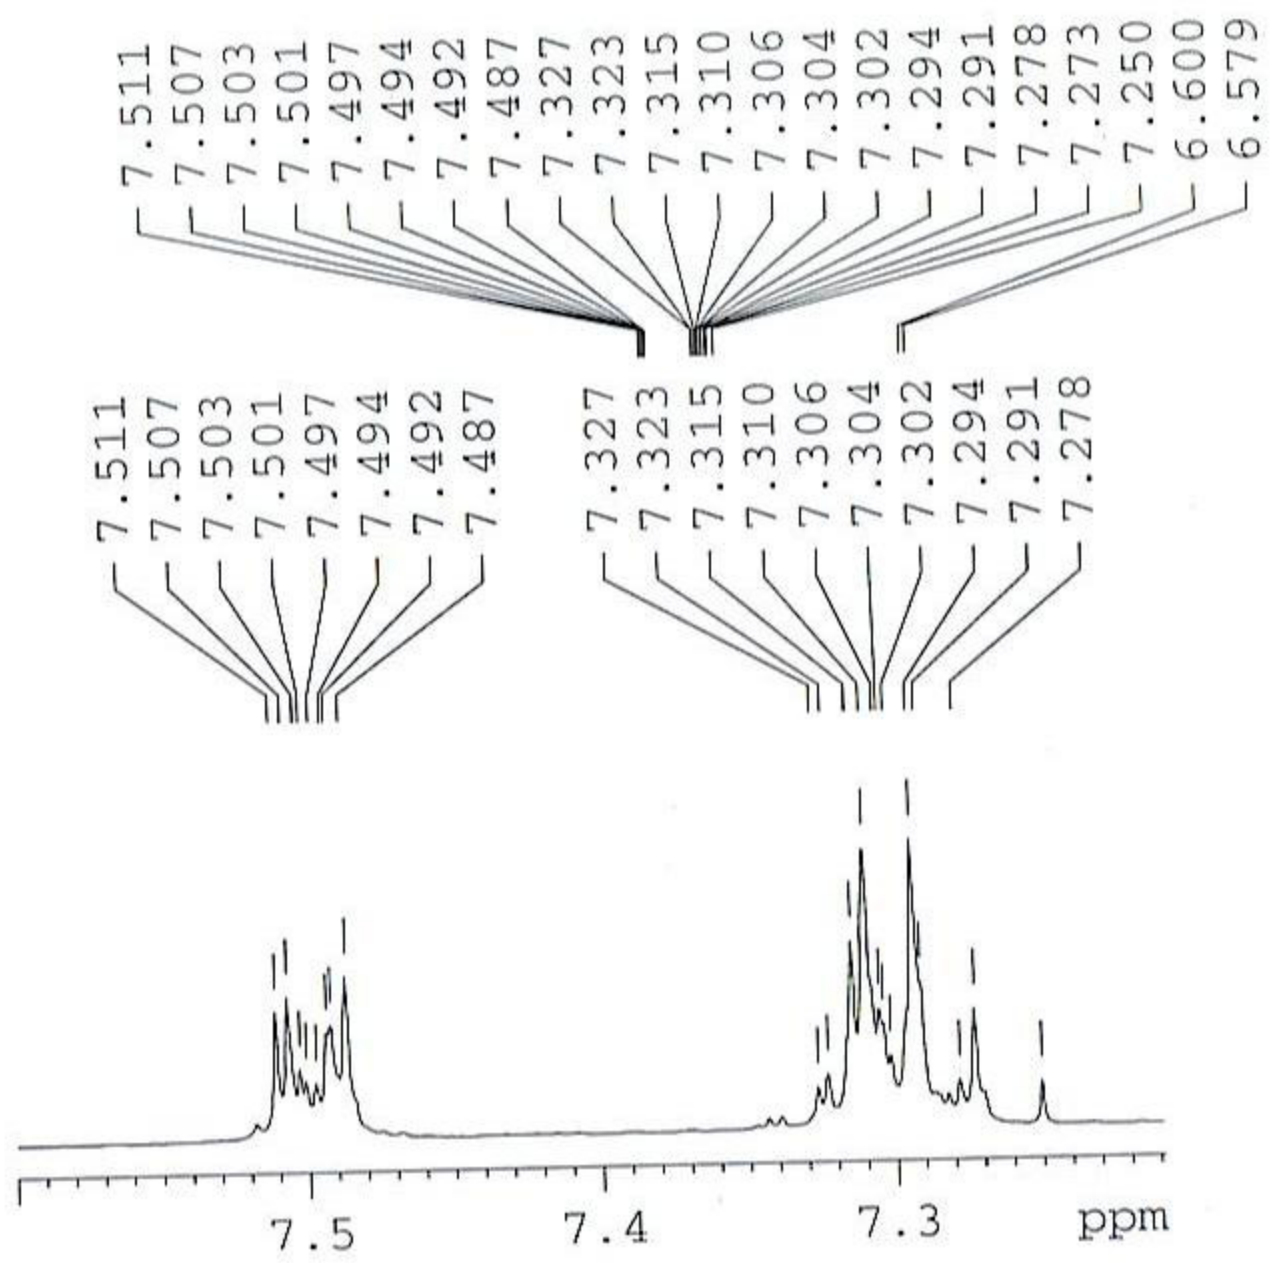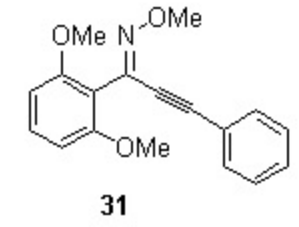

— 4.114  
— 3.829

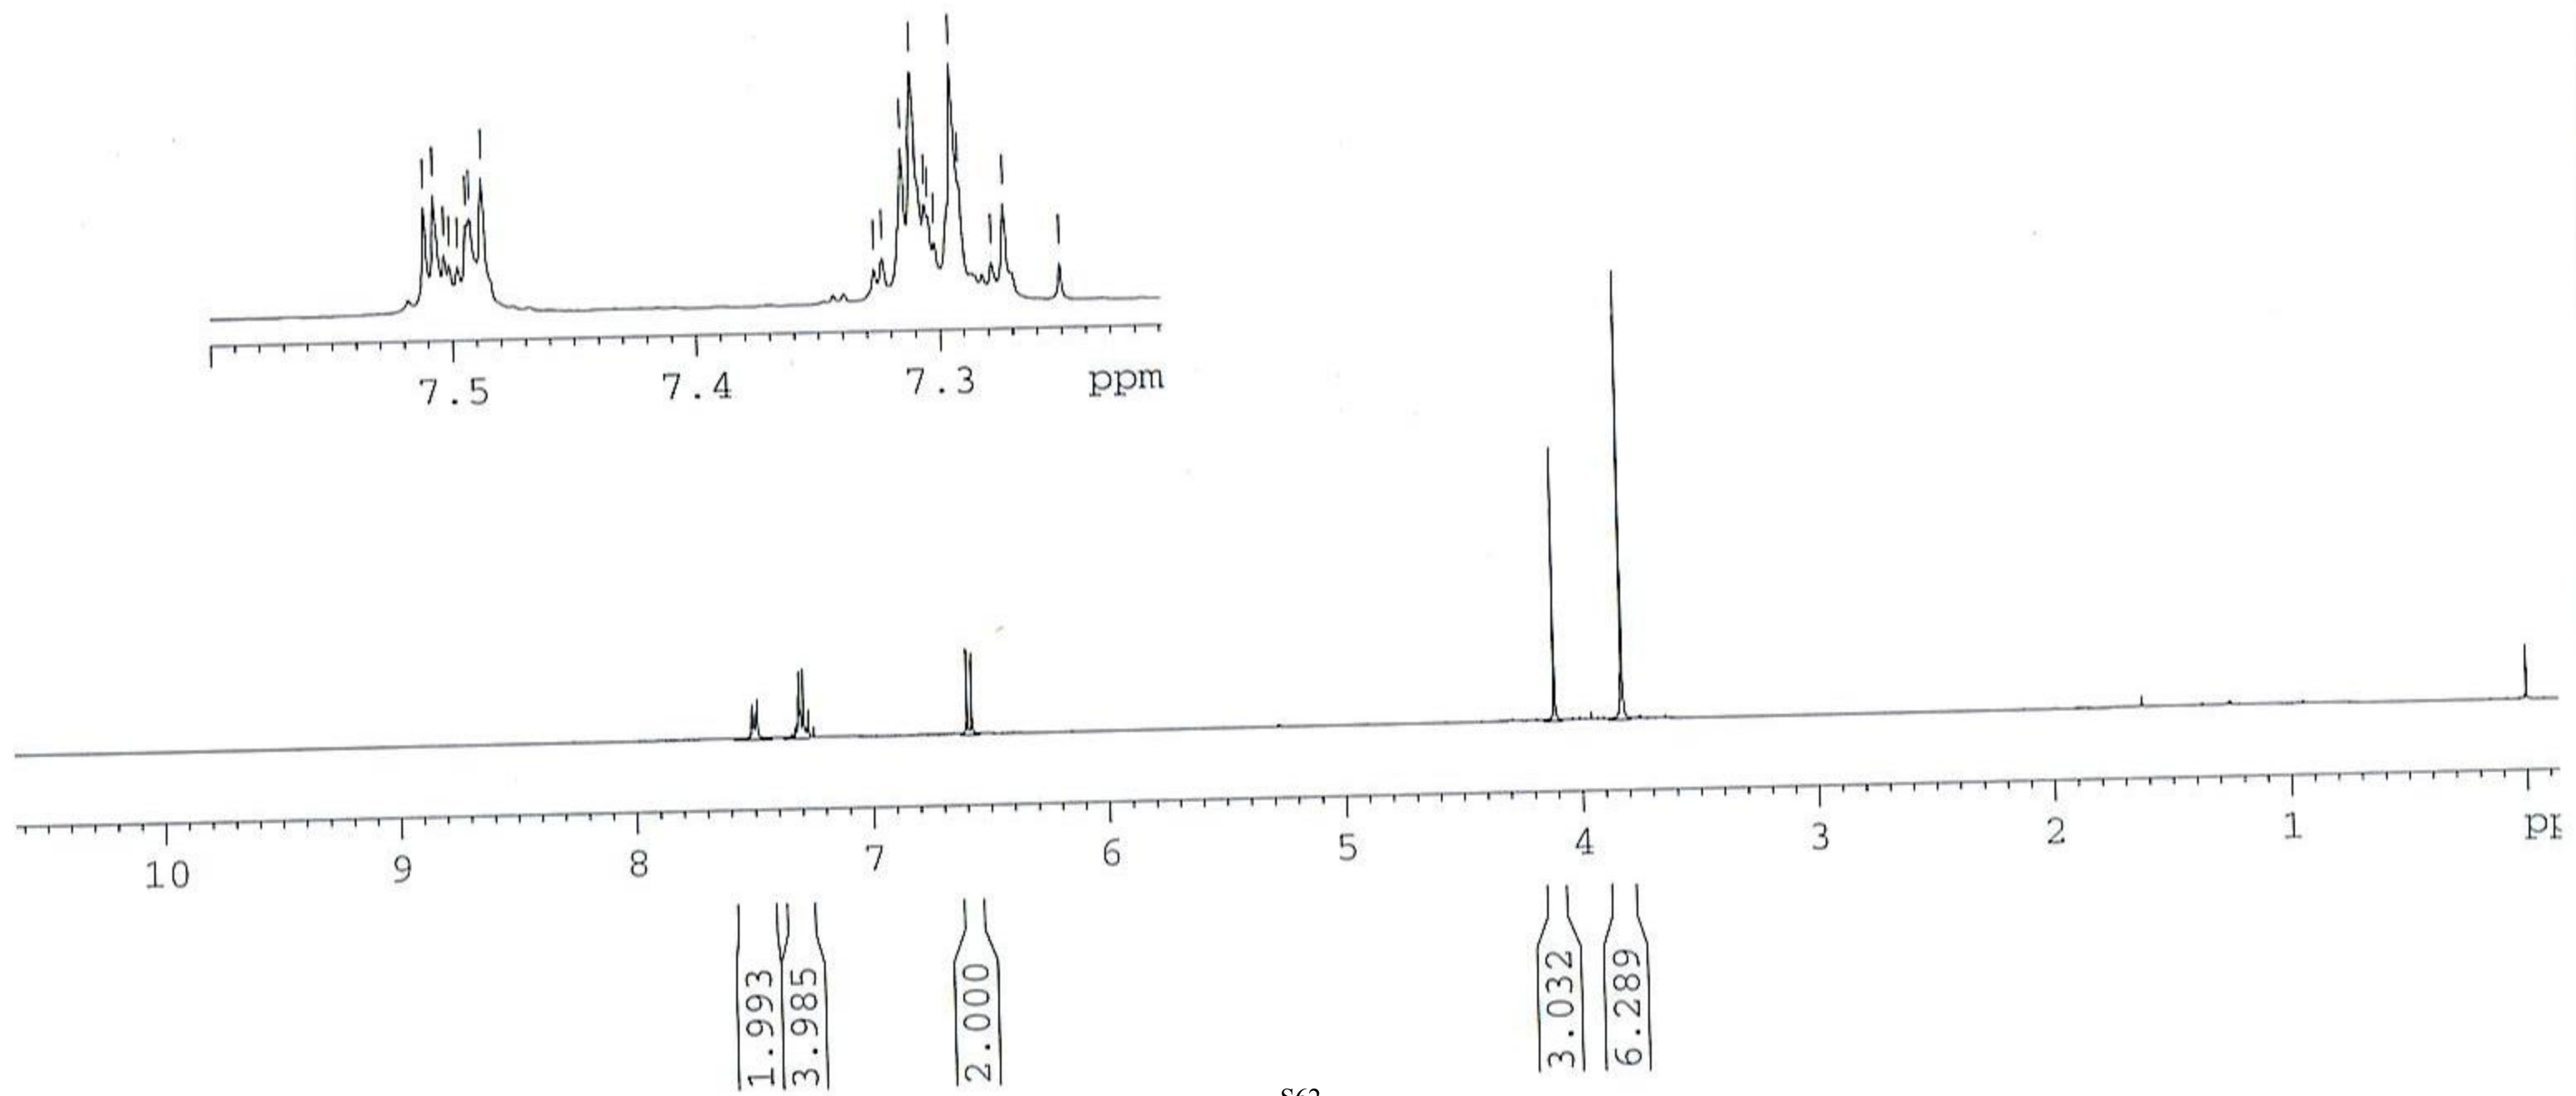

— -0.000

159.026  
134.975  
132.403  
130.972  
129.364  
128.452  
122.430  
112.219  
104.405  
98.615  
81.449  
77.658  
77.342  
77.023  
63.120  
56.356

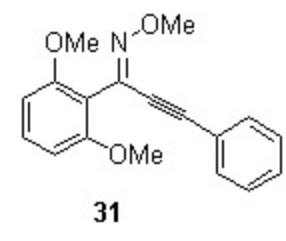

200 180 160 140 120 100 80 60 40 20 0 p

S63

8.149  
8.144  
8.142  
8.139  
8.135  
8.132  
8.128  
8.124  
7.515  
7.503  
7.501  
7.497  
7.492  
7.489  
7.488  
7.483  
7.479  
7.477  
7.470  
7.467  
7.436  
7.415  
7.394  
7.248  
6.668  
6.647

3.784

0.000

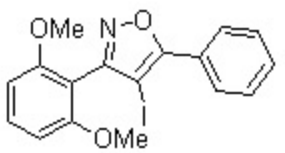

32

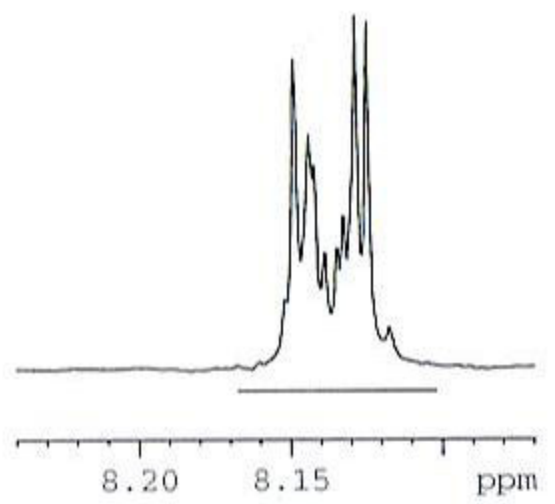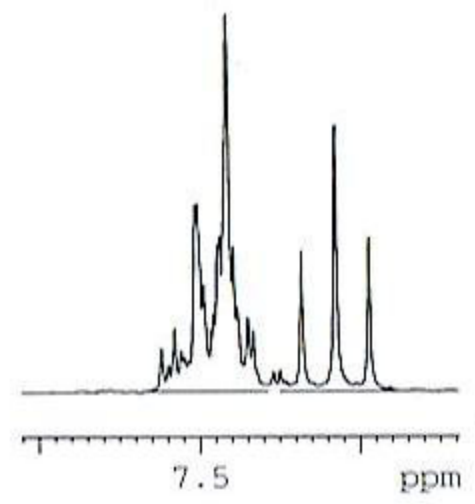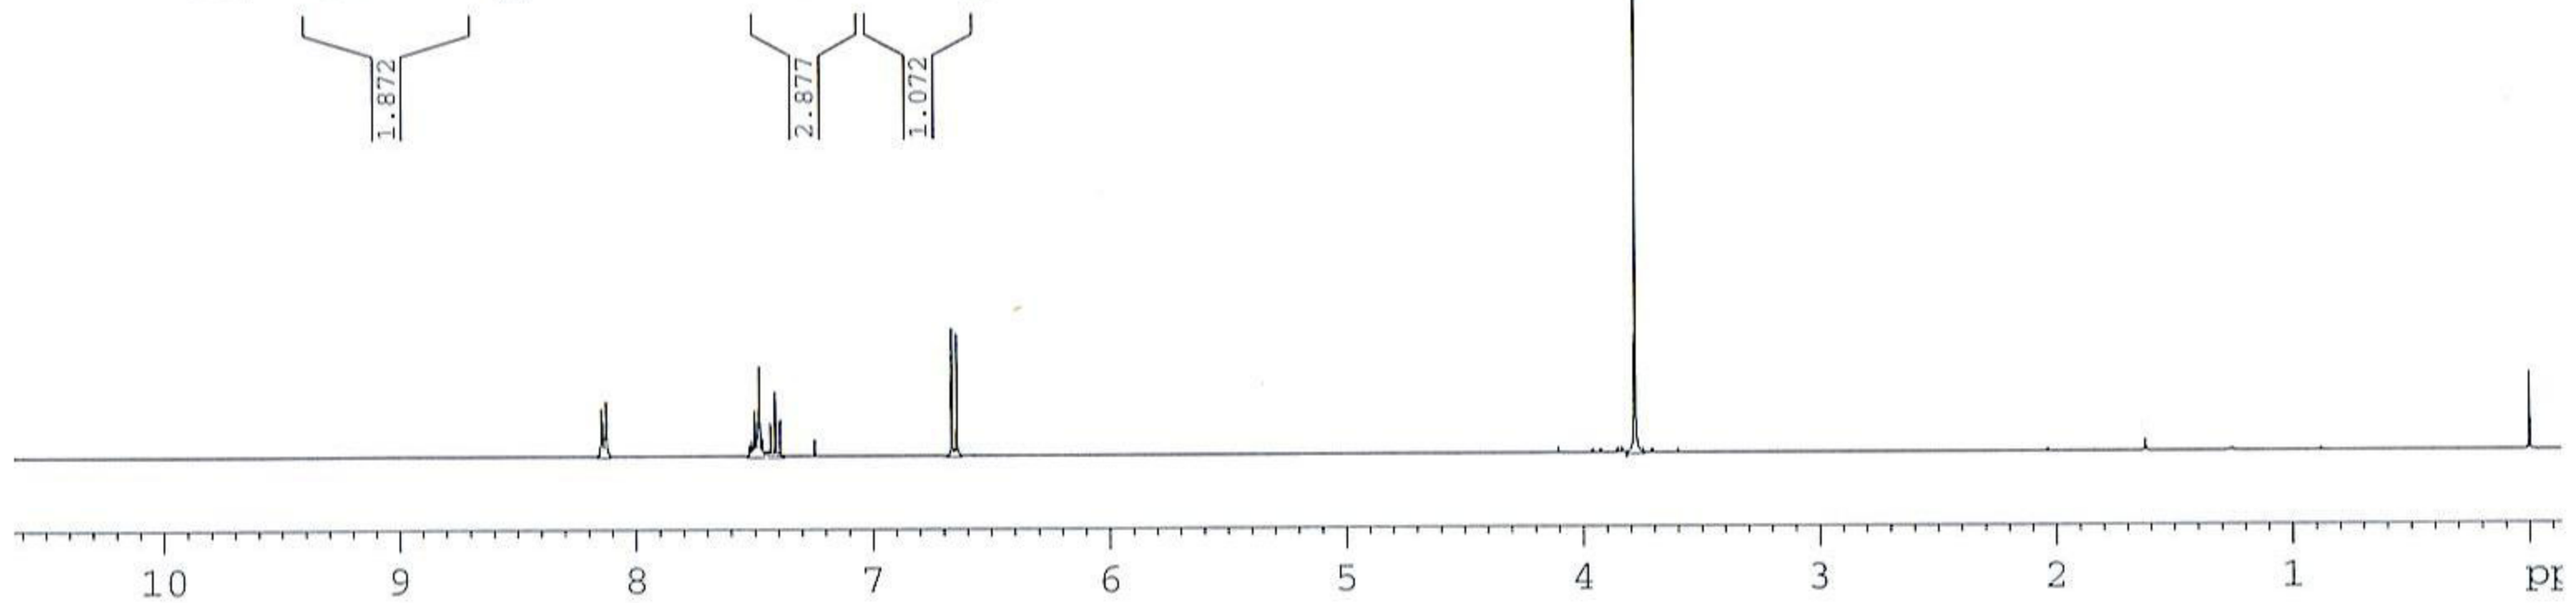

1.872

2.877  
1.072

2.000

6.259



— 167.5460  
— 162.5646  
— 159.0617

132.0506  
130.5721  
128.8661  
127.7516  
127.6151

— 106.6924  
— 104.1638

77.6417  
77.3233  
77.0048

— 60.6769  
— 56.2755

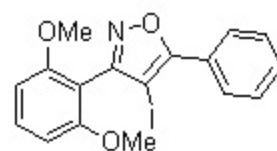

32

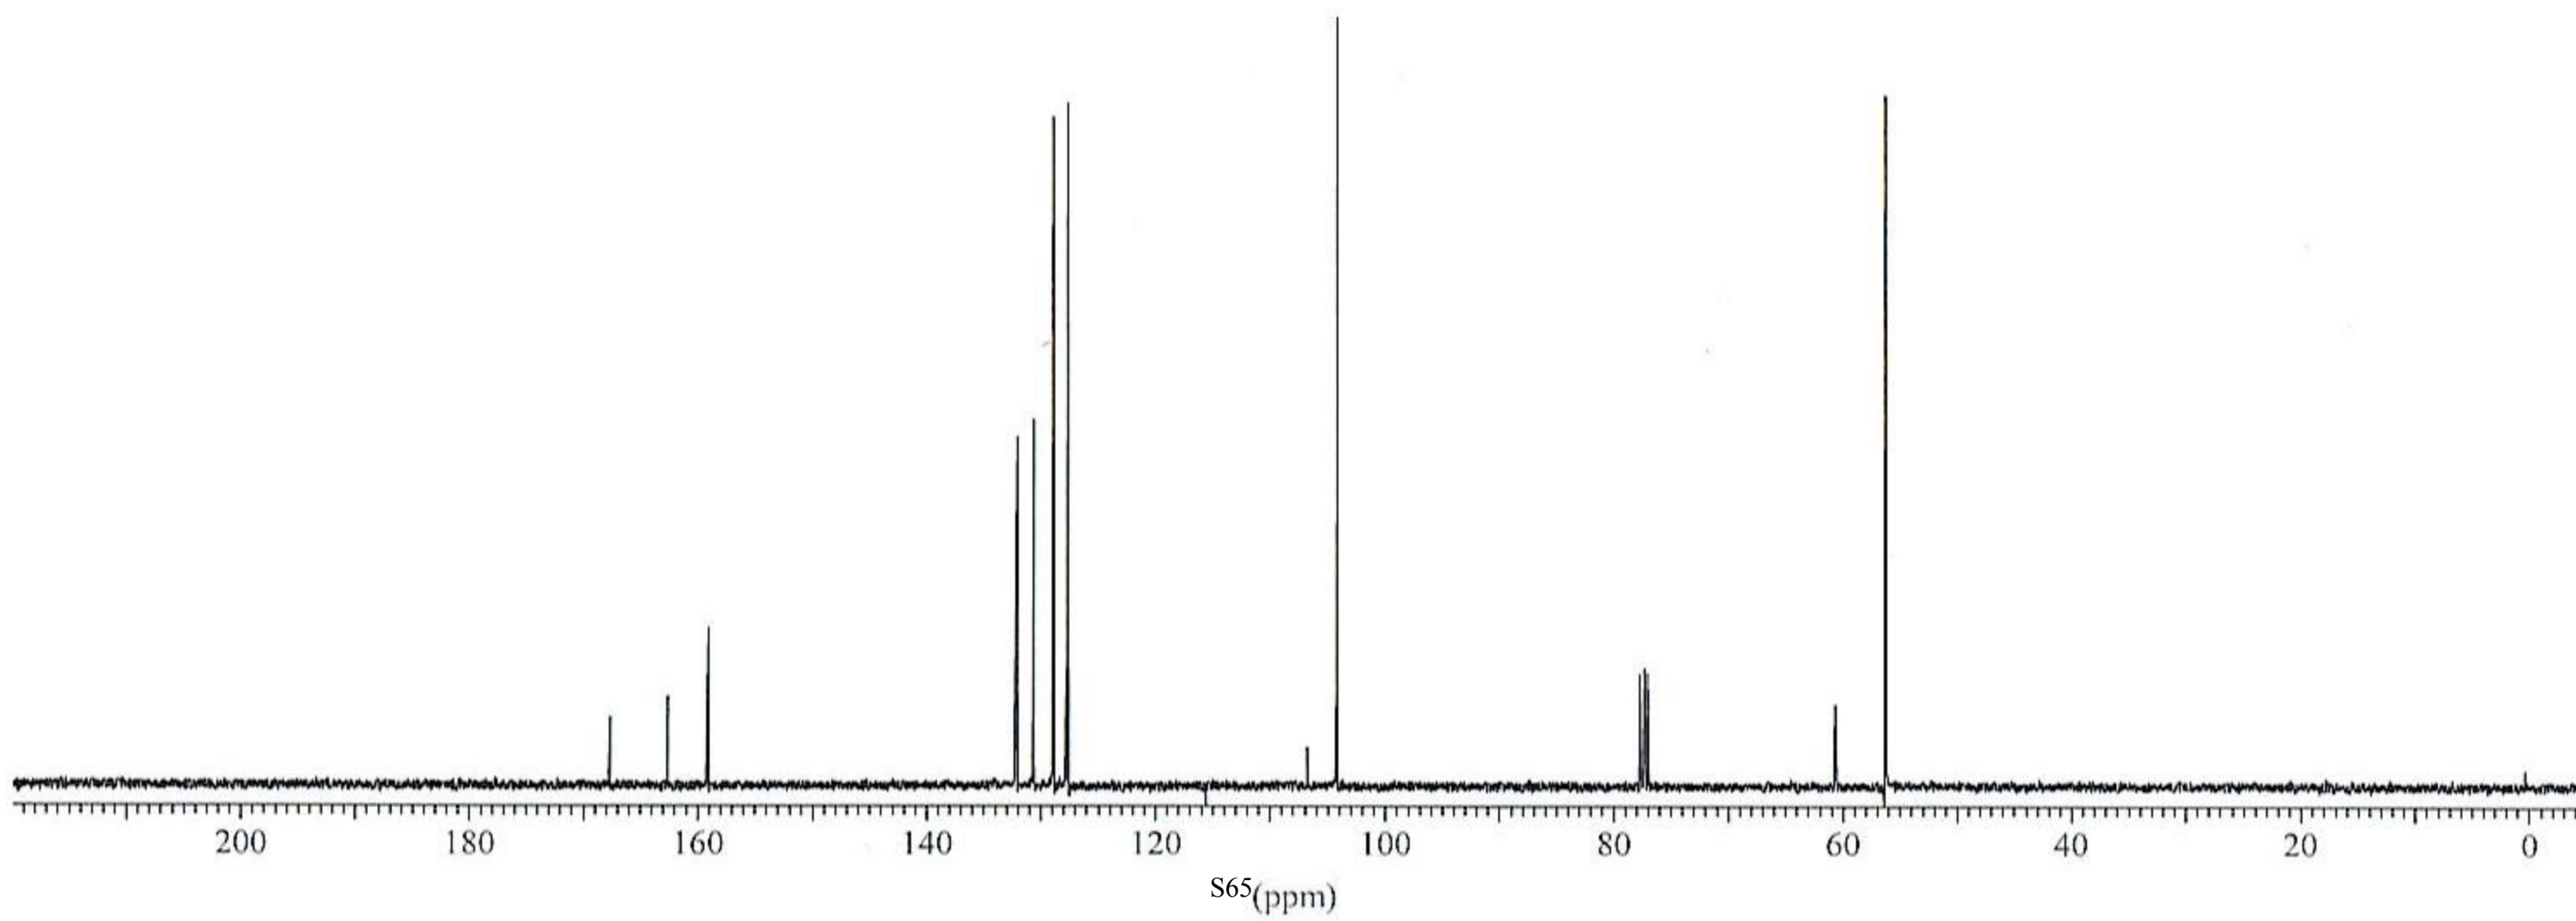

7.614  
7.609  
7.597  
7.595  
7.593  
7.589  
7.449  
7.444  
7.424  
7.422  
7.420  
7.418  
7.416  
7.386  
7.384  
7.383  
7.381  
7.375  
7.369  
7.367  
7.365  
7.364  
6.837  
6.835  
6.817  
6.815  
5.987  
4.105

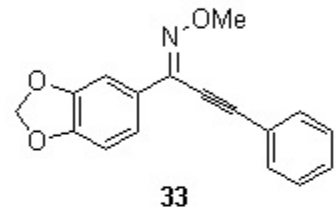

— 0.000

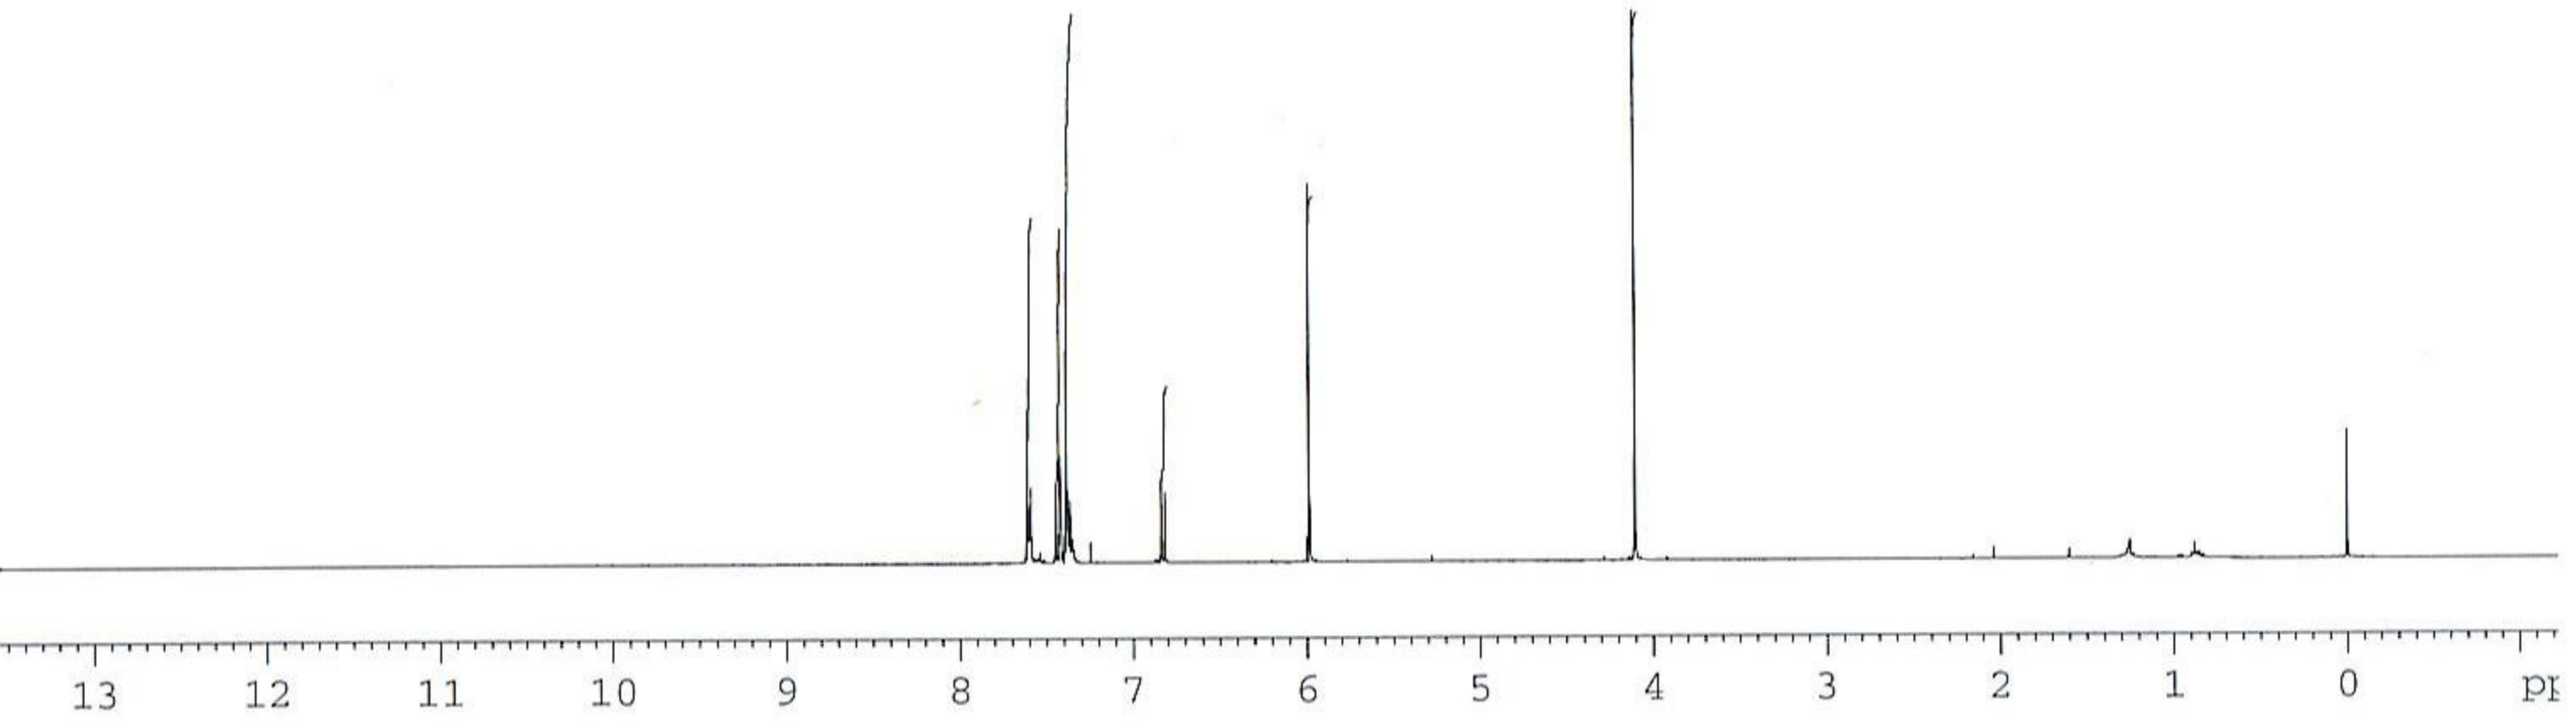

1.962  
1.904  
3.127  
1.000  
2.080  
3.125

S66

149.272  
148.119  
139.624  
132.371  
129.772  
128.679  
128.090  
121.947  
121.774  
108.292  
106.409  
101.662  
101.126  
79.639  
77.623  
77.306  
76.989  
63.311

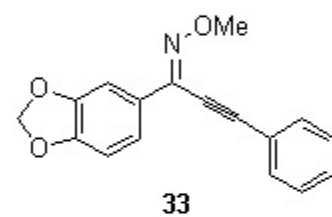

200 180 160 140 120 100 80 60 40 20 0 p.p.m.

8.067  
8.065  
8.062  
8.059  
8.057  
8.056  
8.052  
8.048  
8.043  
7.538  
7.527  
7.525  
7.523  
7.515  
7.510  
7.505  
7.325  
7.321  
7.305  
7.300  
7.263  
7.260  
7.259  
7.255  
6.954  
6.954  
6.934  
6.933  
6.051

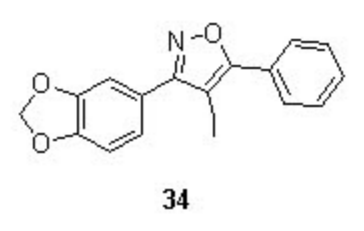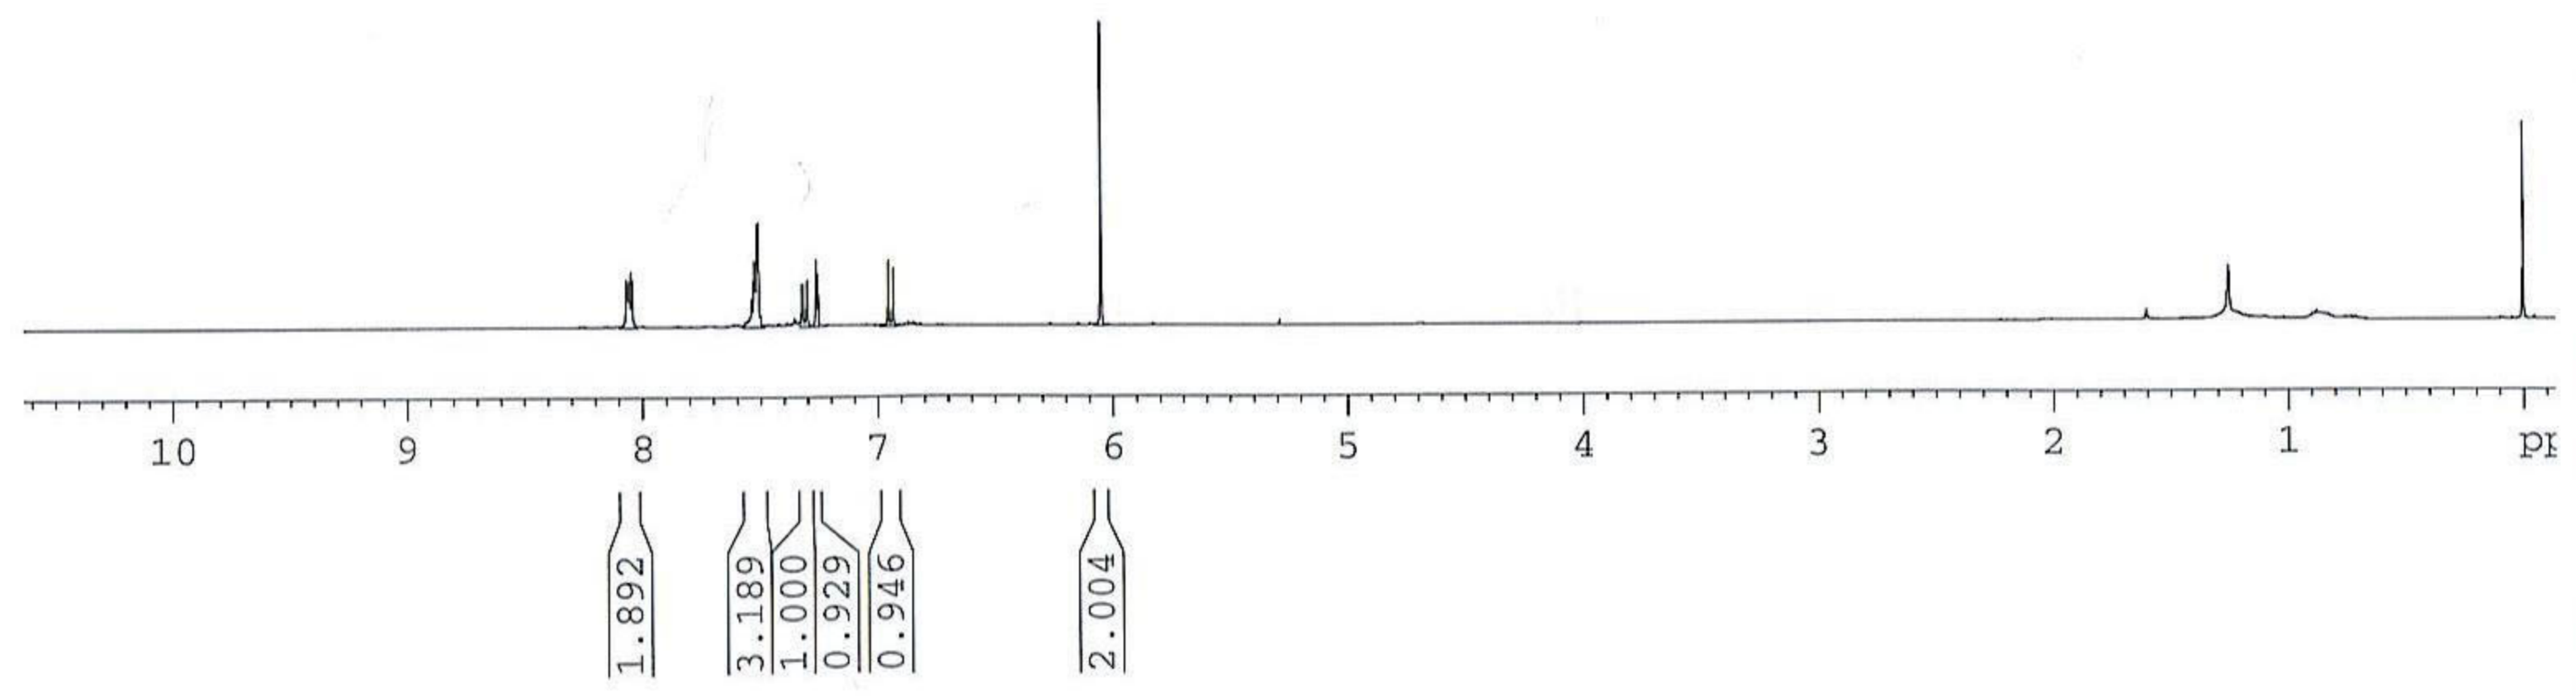

169.158  
164.457  
149.399  
147.995  
130.940  
128.965  
128.013  
127.492  
123.616  
122.497  
109.546  
108.724  
101.768  
77.608  
77.289  
76.973  
56.441

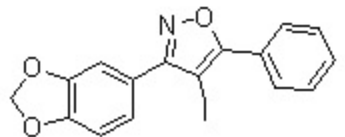

34

200 180 160 140 120 100 80 60 40 20 0 1

S69

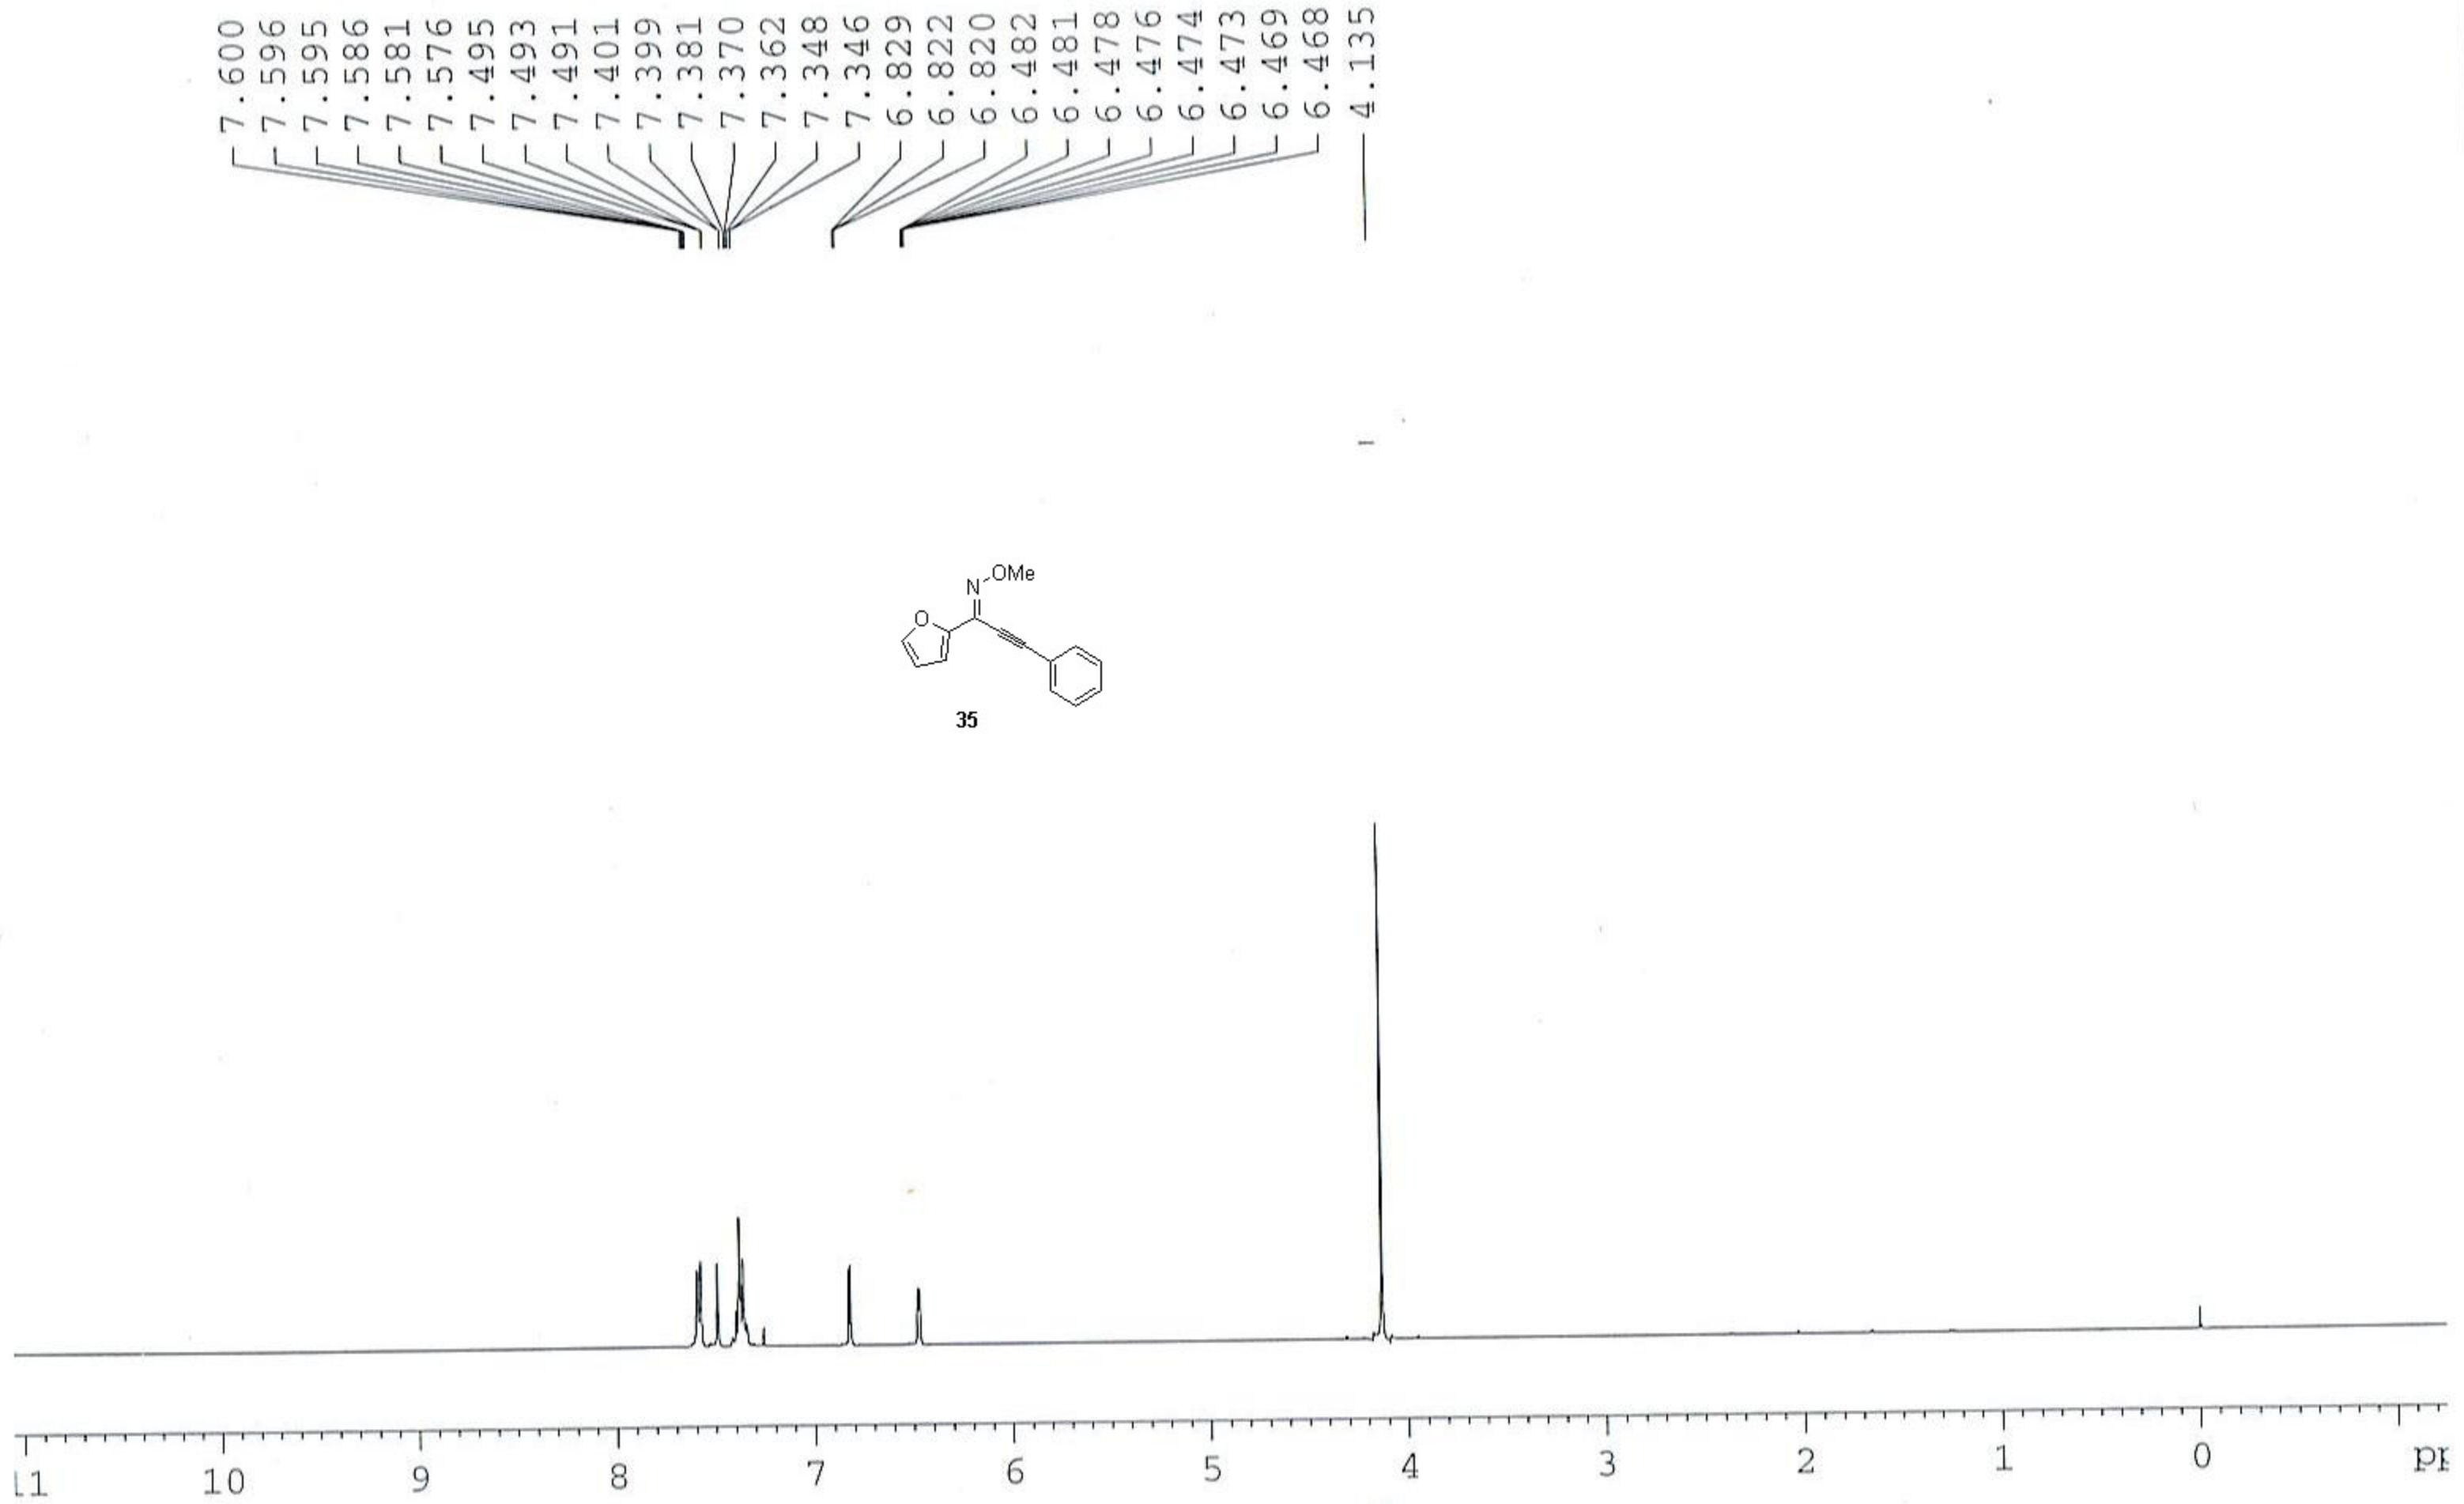

148.348  
144.373  
132.409  
132.234  
129.968  
128.699  
121.580  
112.652  
111.777  
99.570  
78.179  
77.670  
77.352  
77.033  
63.632

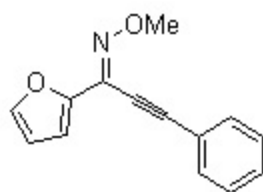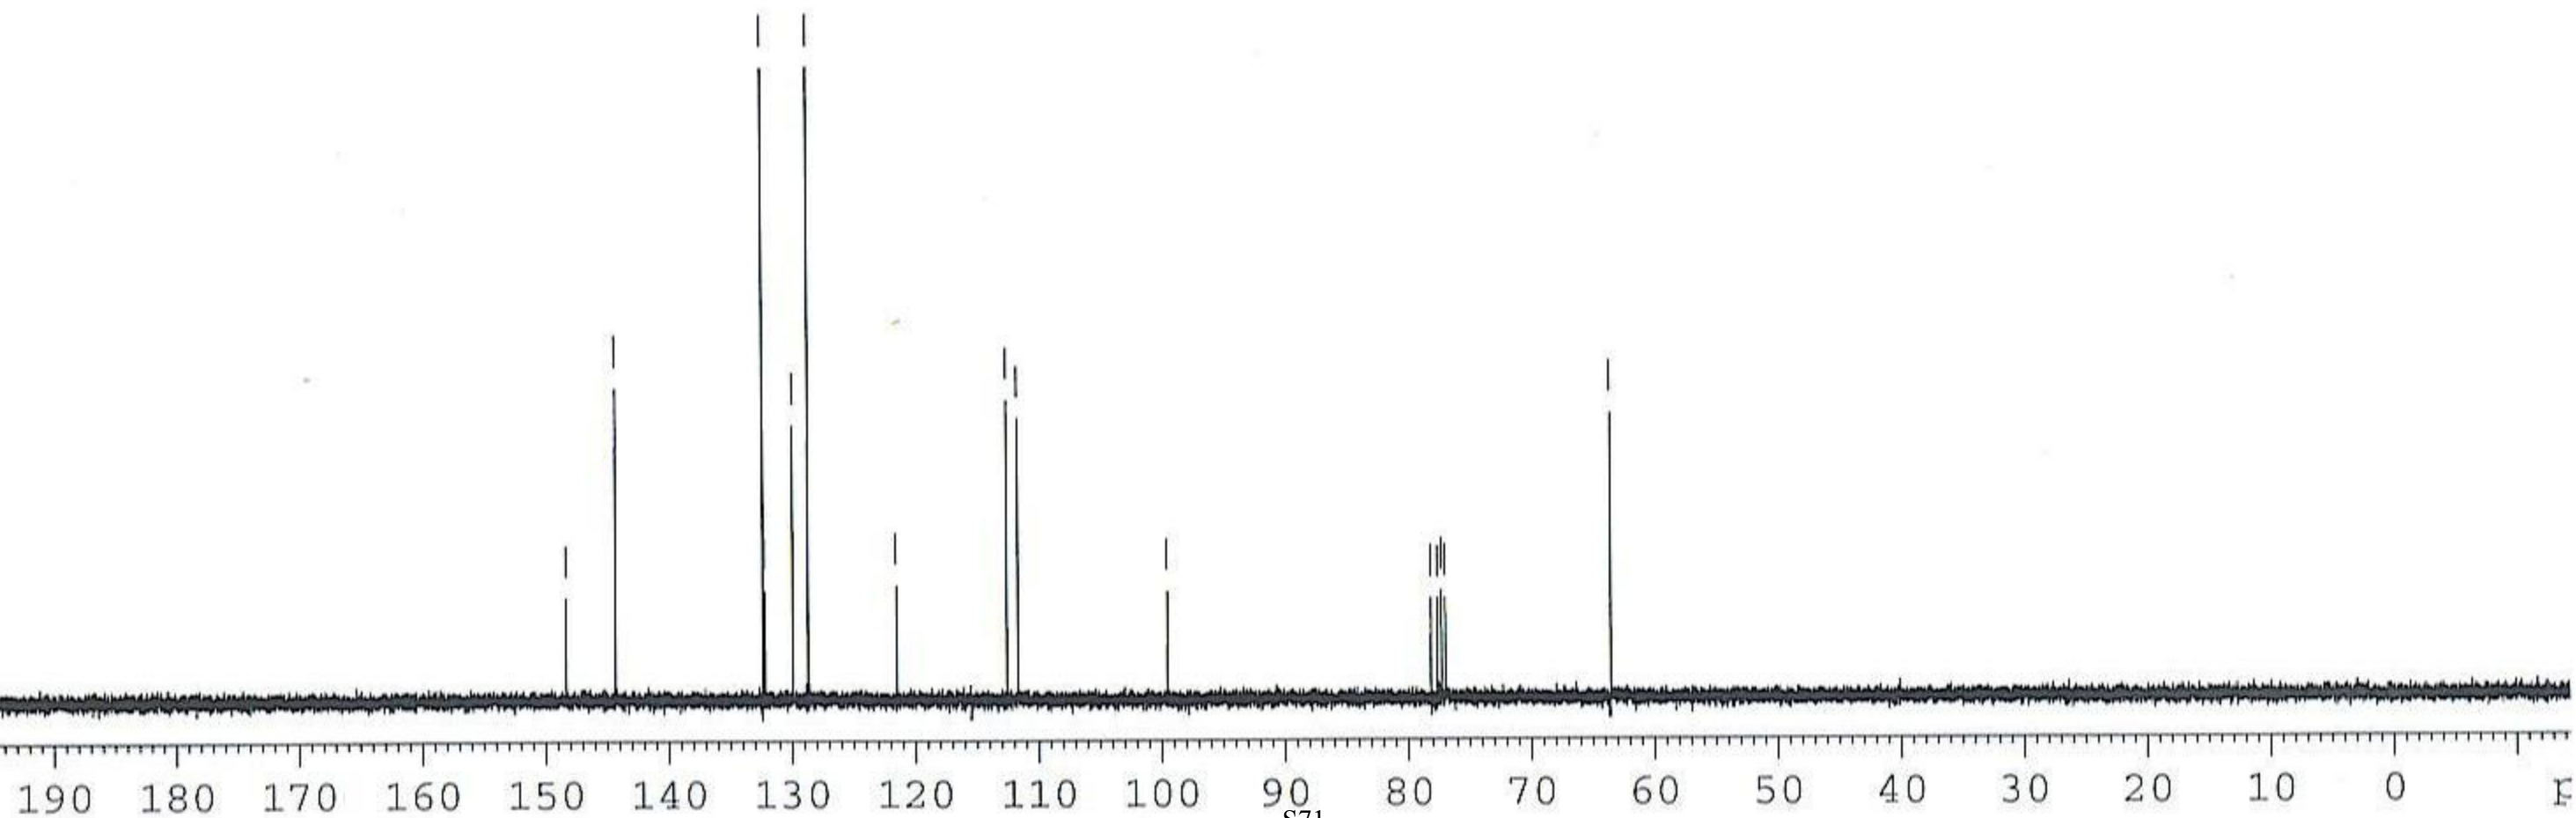

8.047  
8.043  
8.041  
8.039  
8.037  
8.033  
8.029  
8.026  
8.022  
7.540  
7.535  
7.531  
7.529  
7.526  
7.523  
7.518  
7.515  
7.345  
7.336  
7.261  
6.375  
6.366

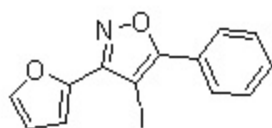

36

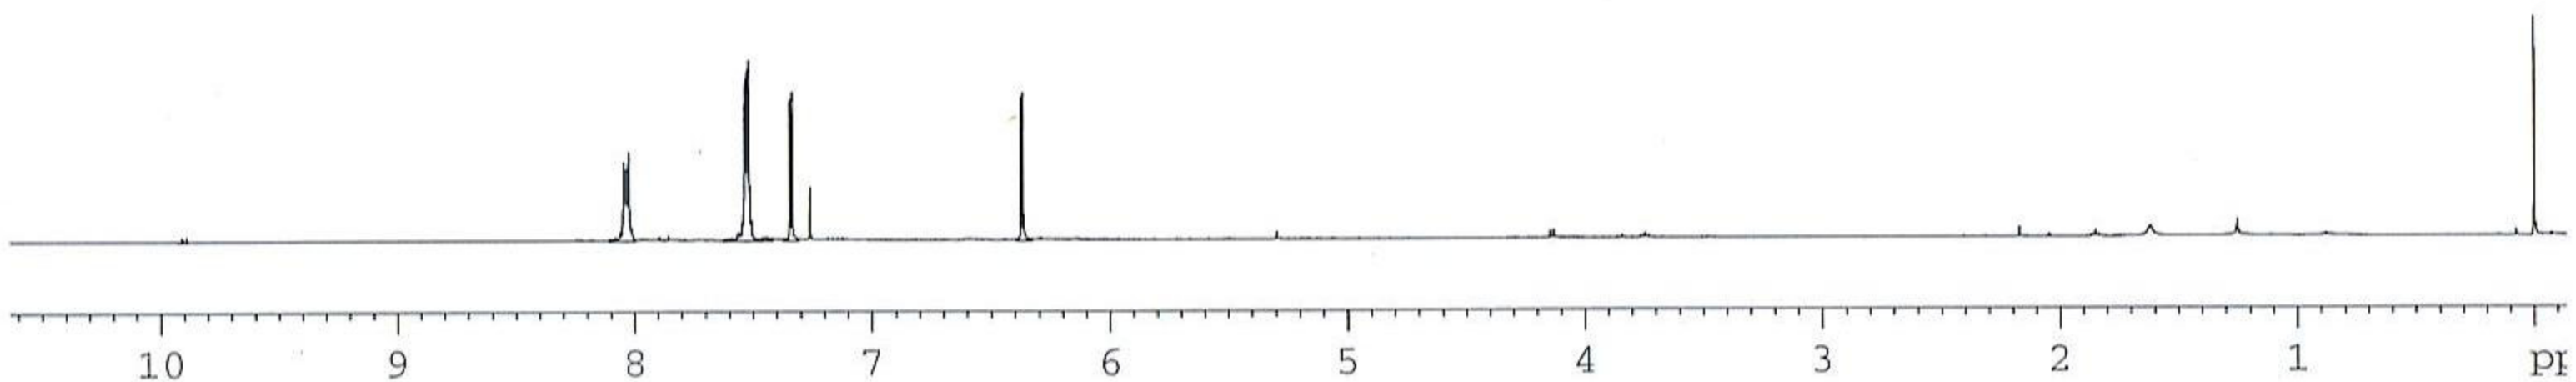

1.939

3.822

1.026

1.000

— 0.000



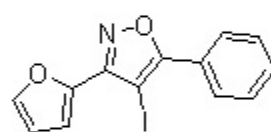

36

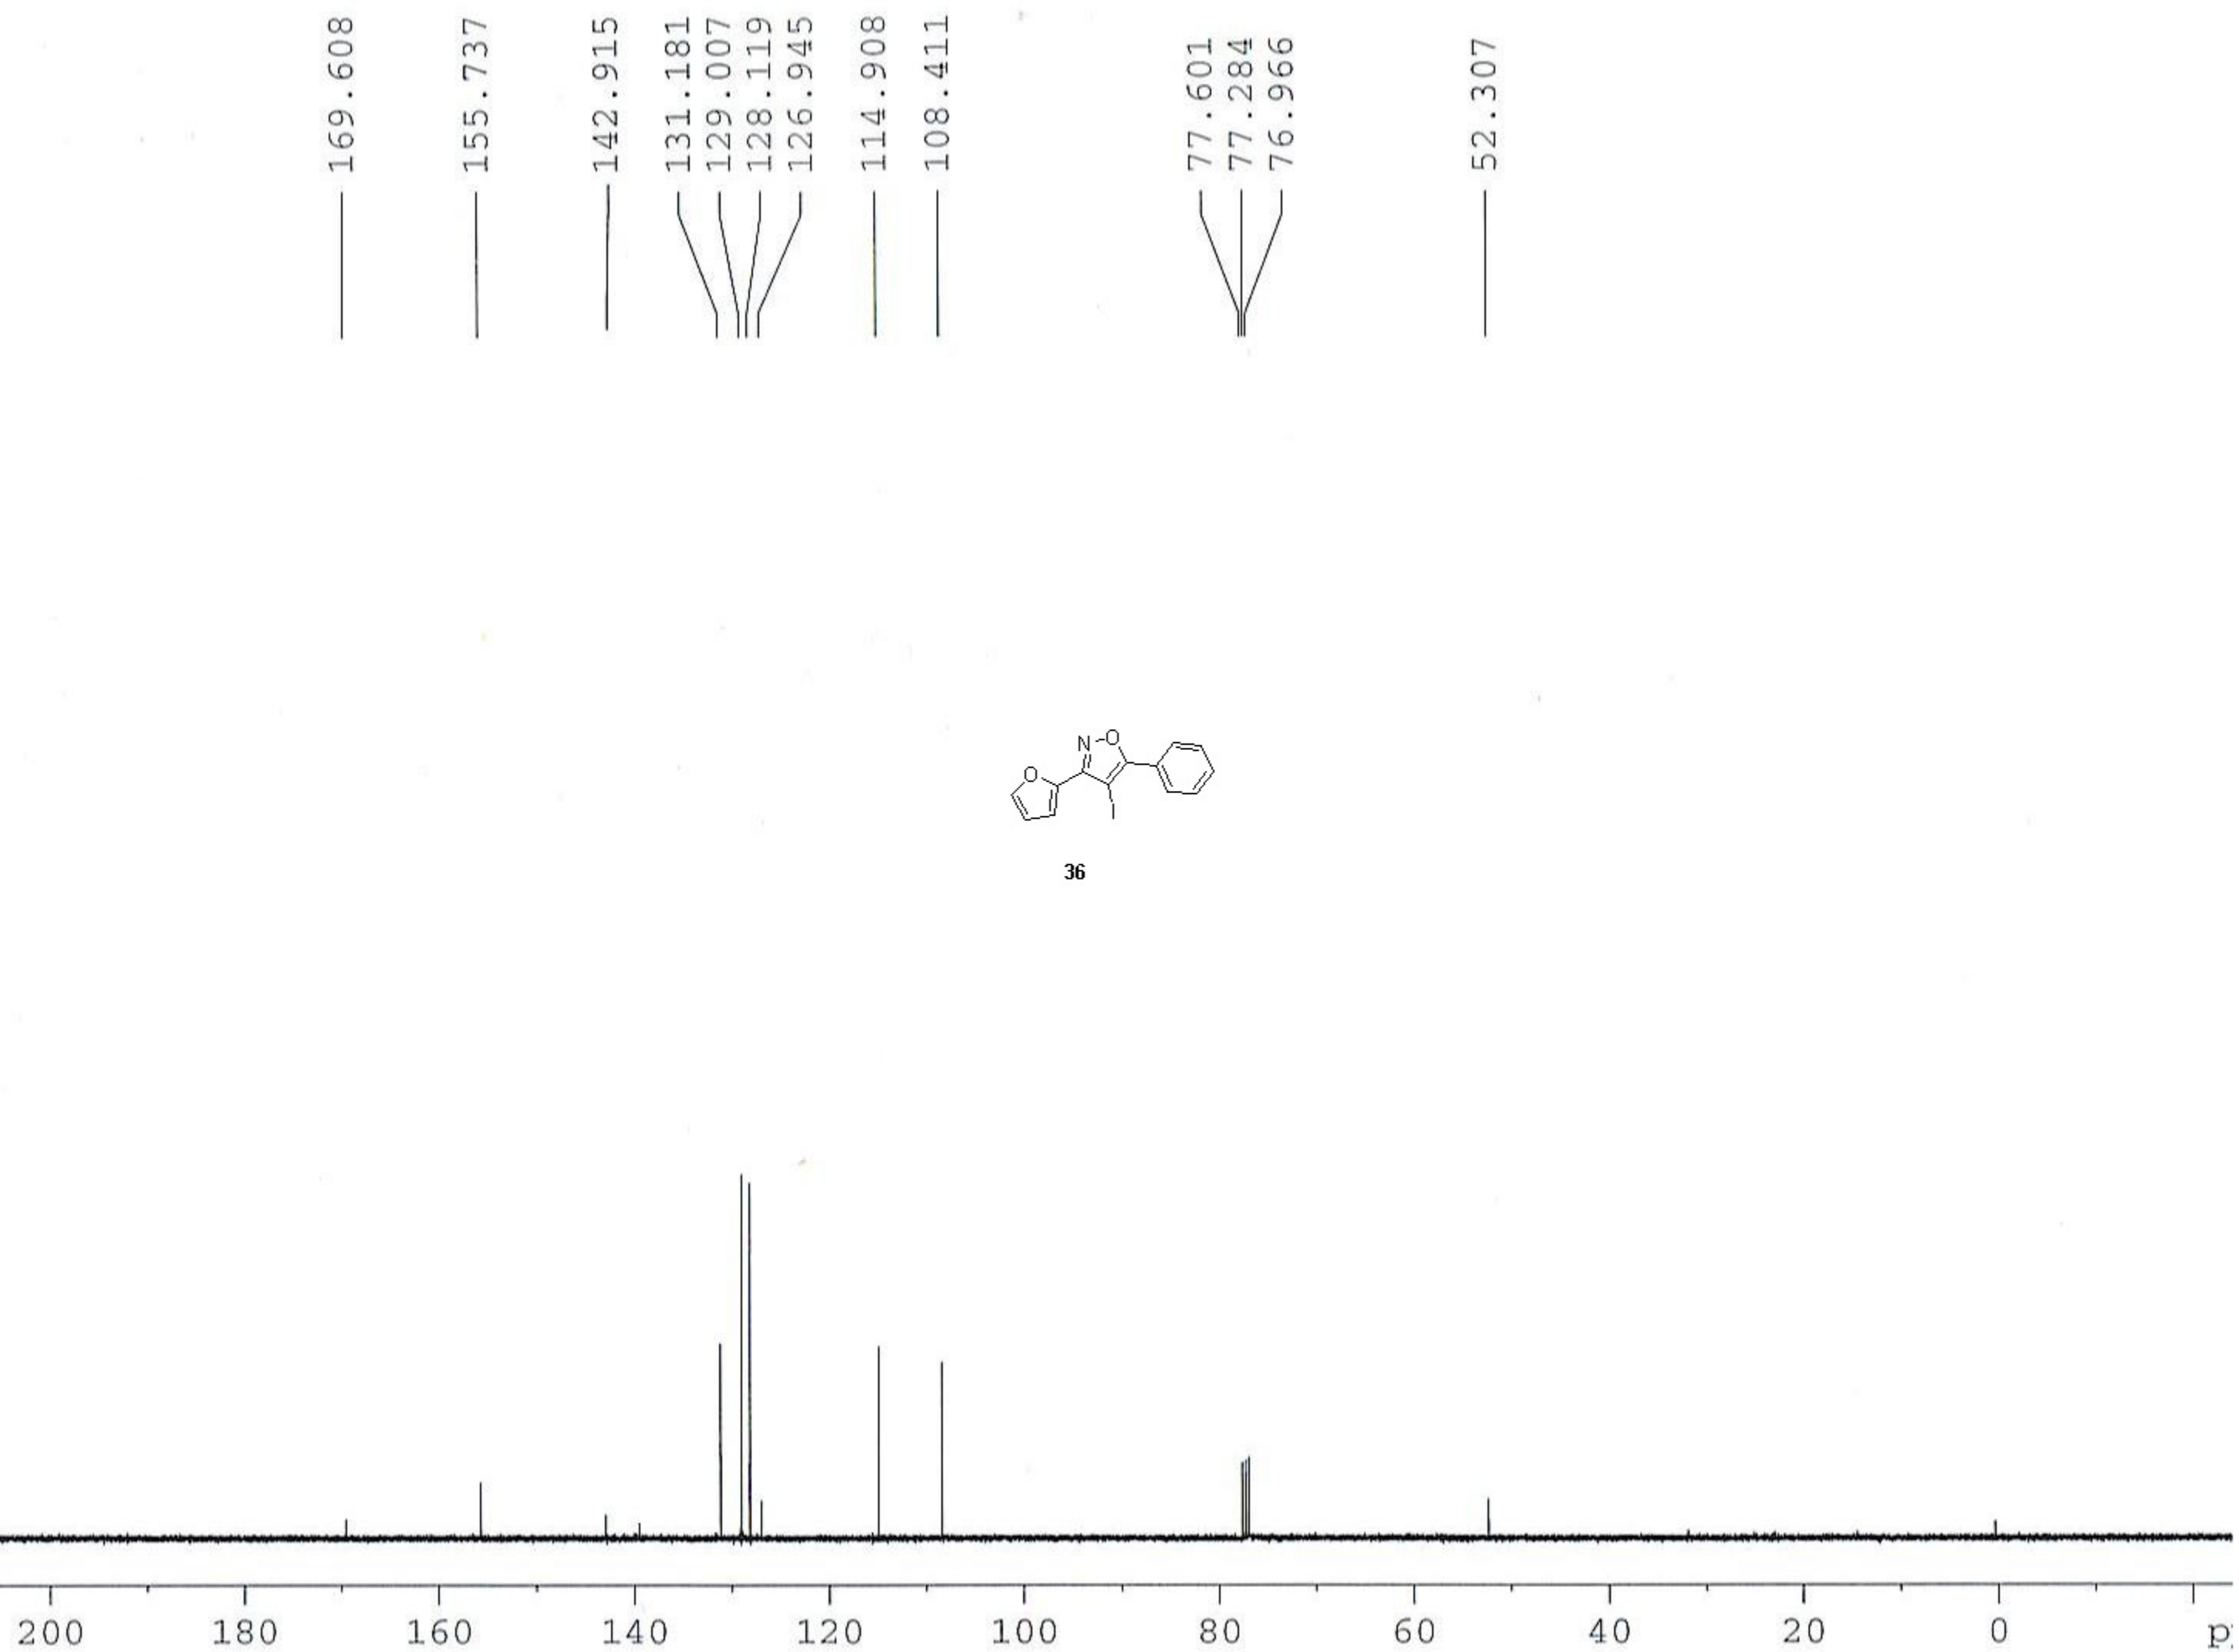

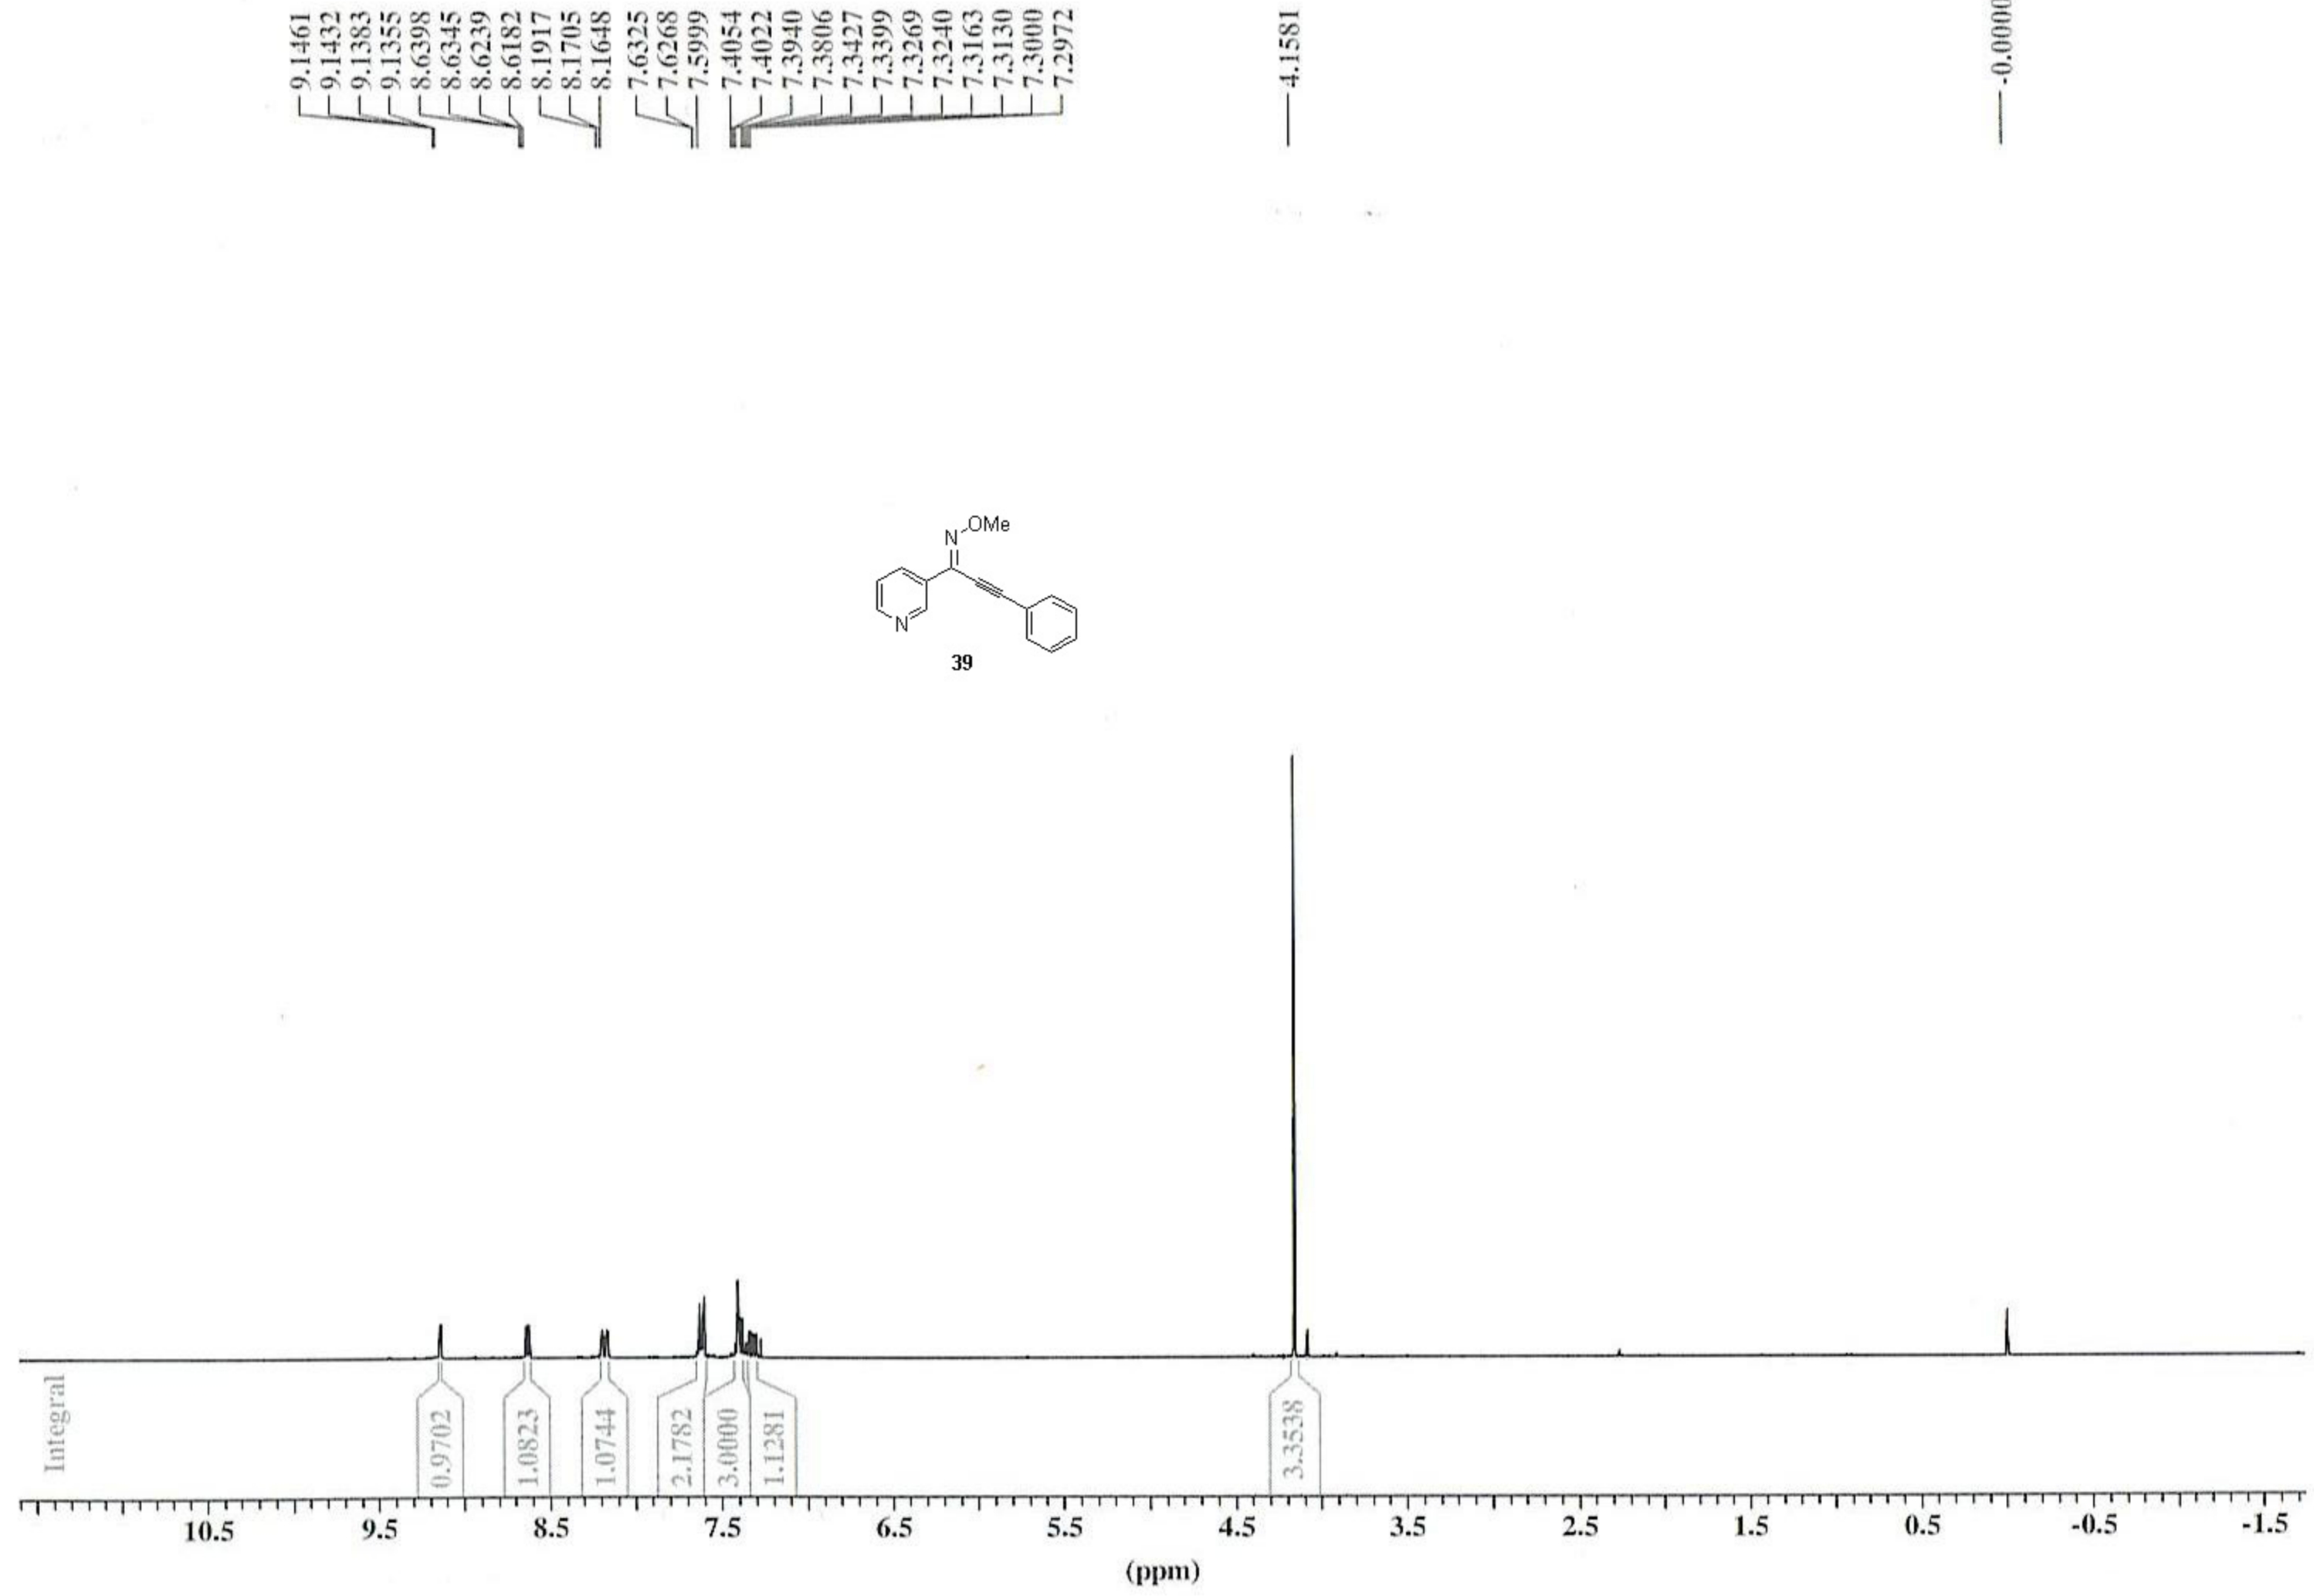

150.7184  
148.2645  
137.6582  
133.6479  
132.4227  
130.0507  
129.7123  
128.7400  
123.4084  
121.5635

102.2919

78.7393

63.6311

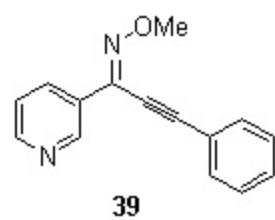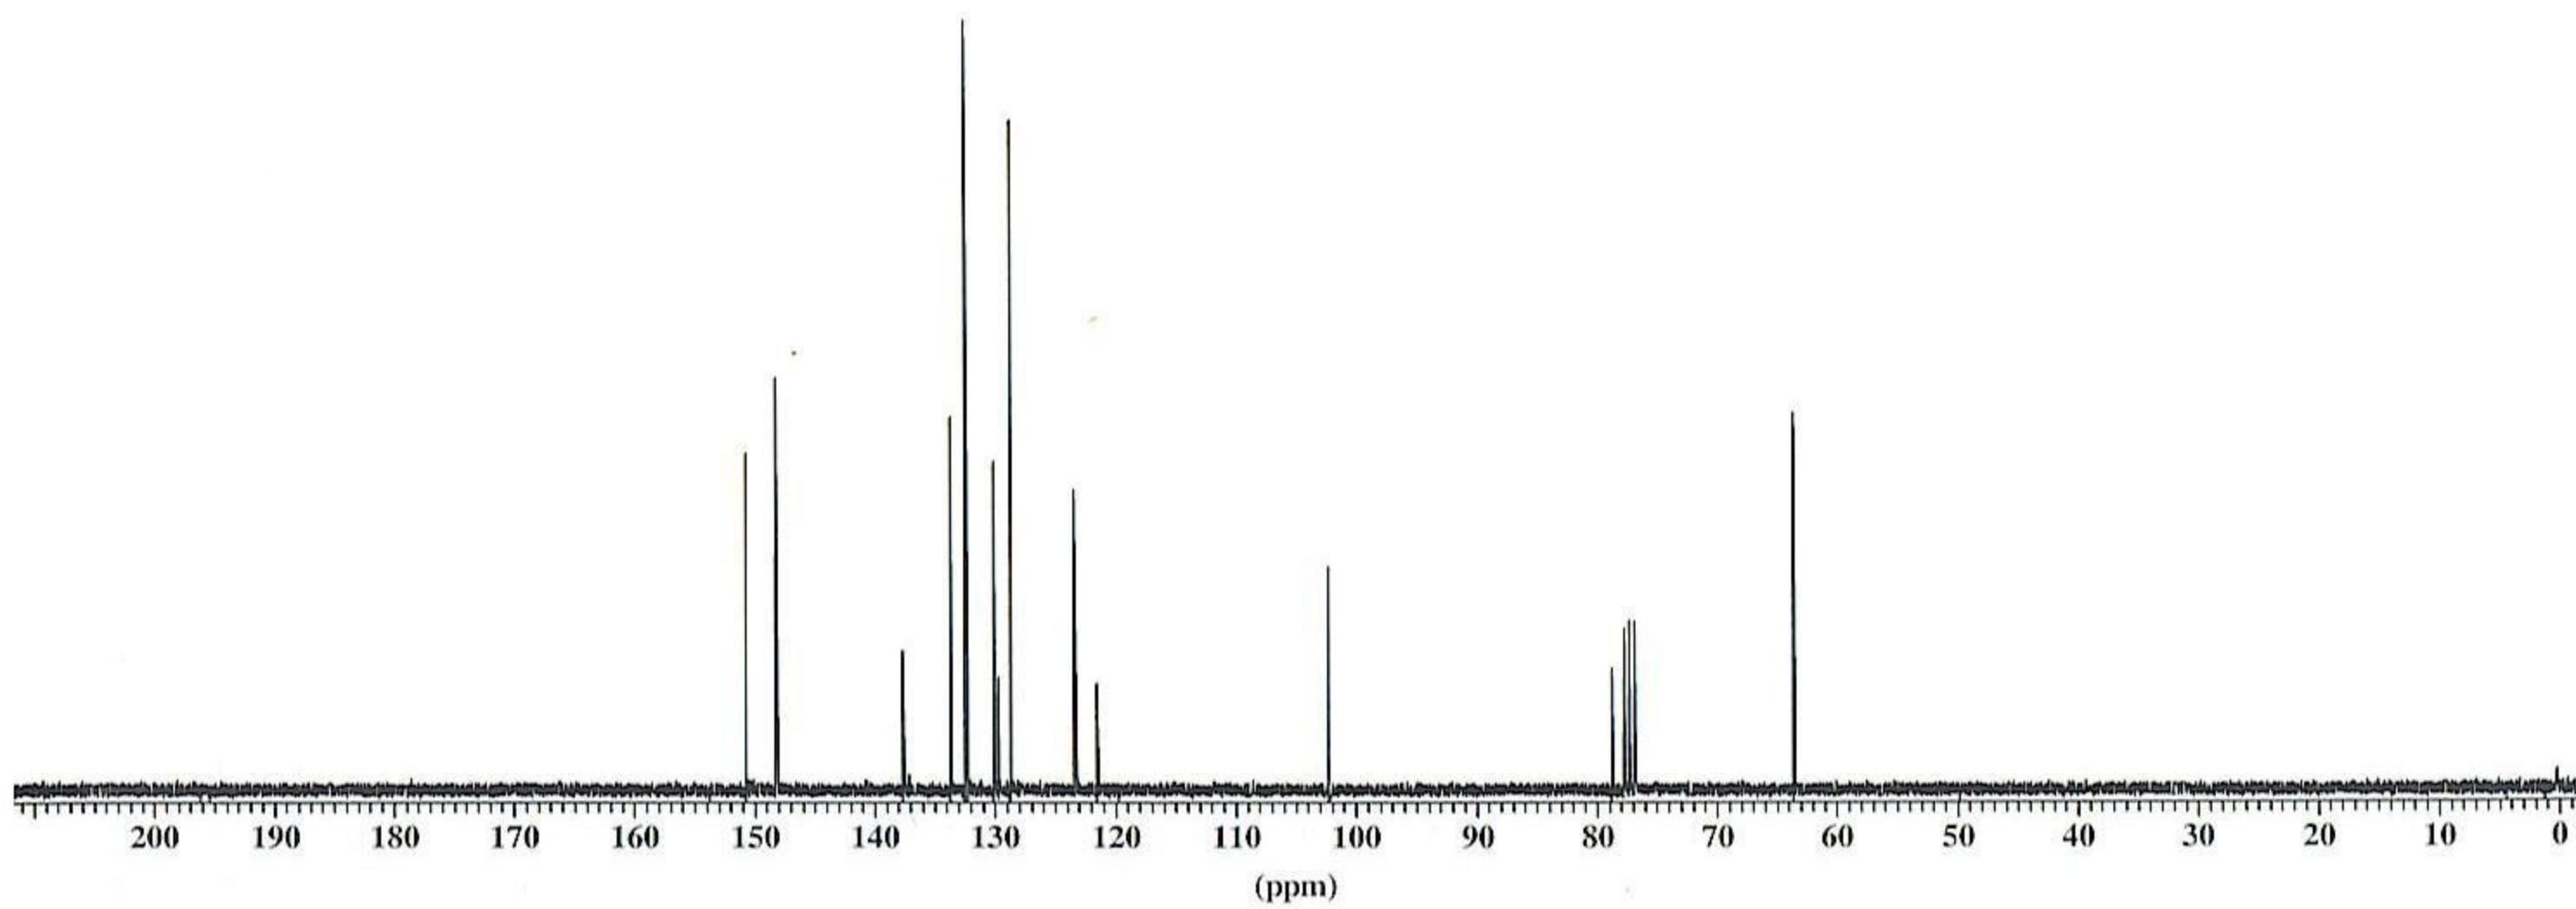

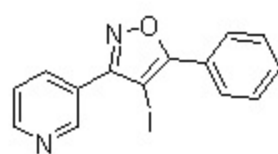

40

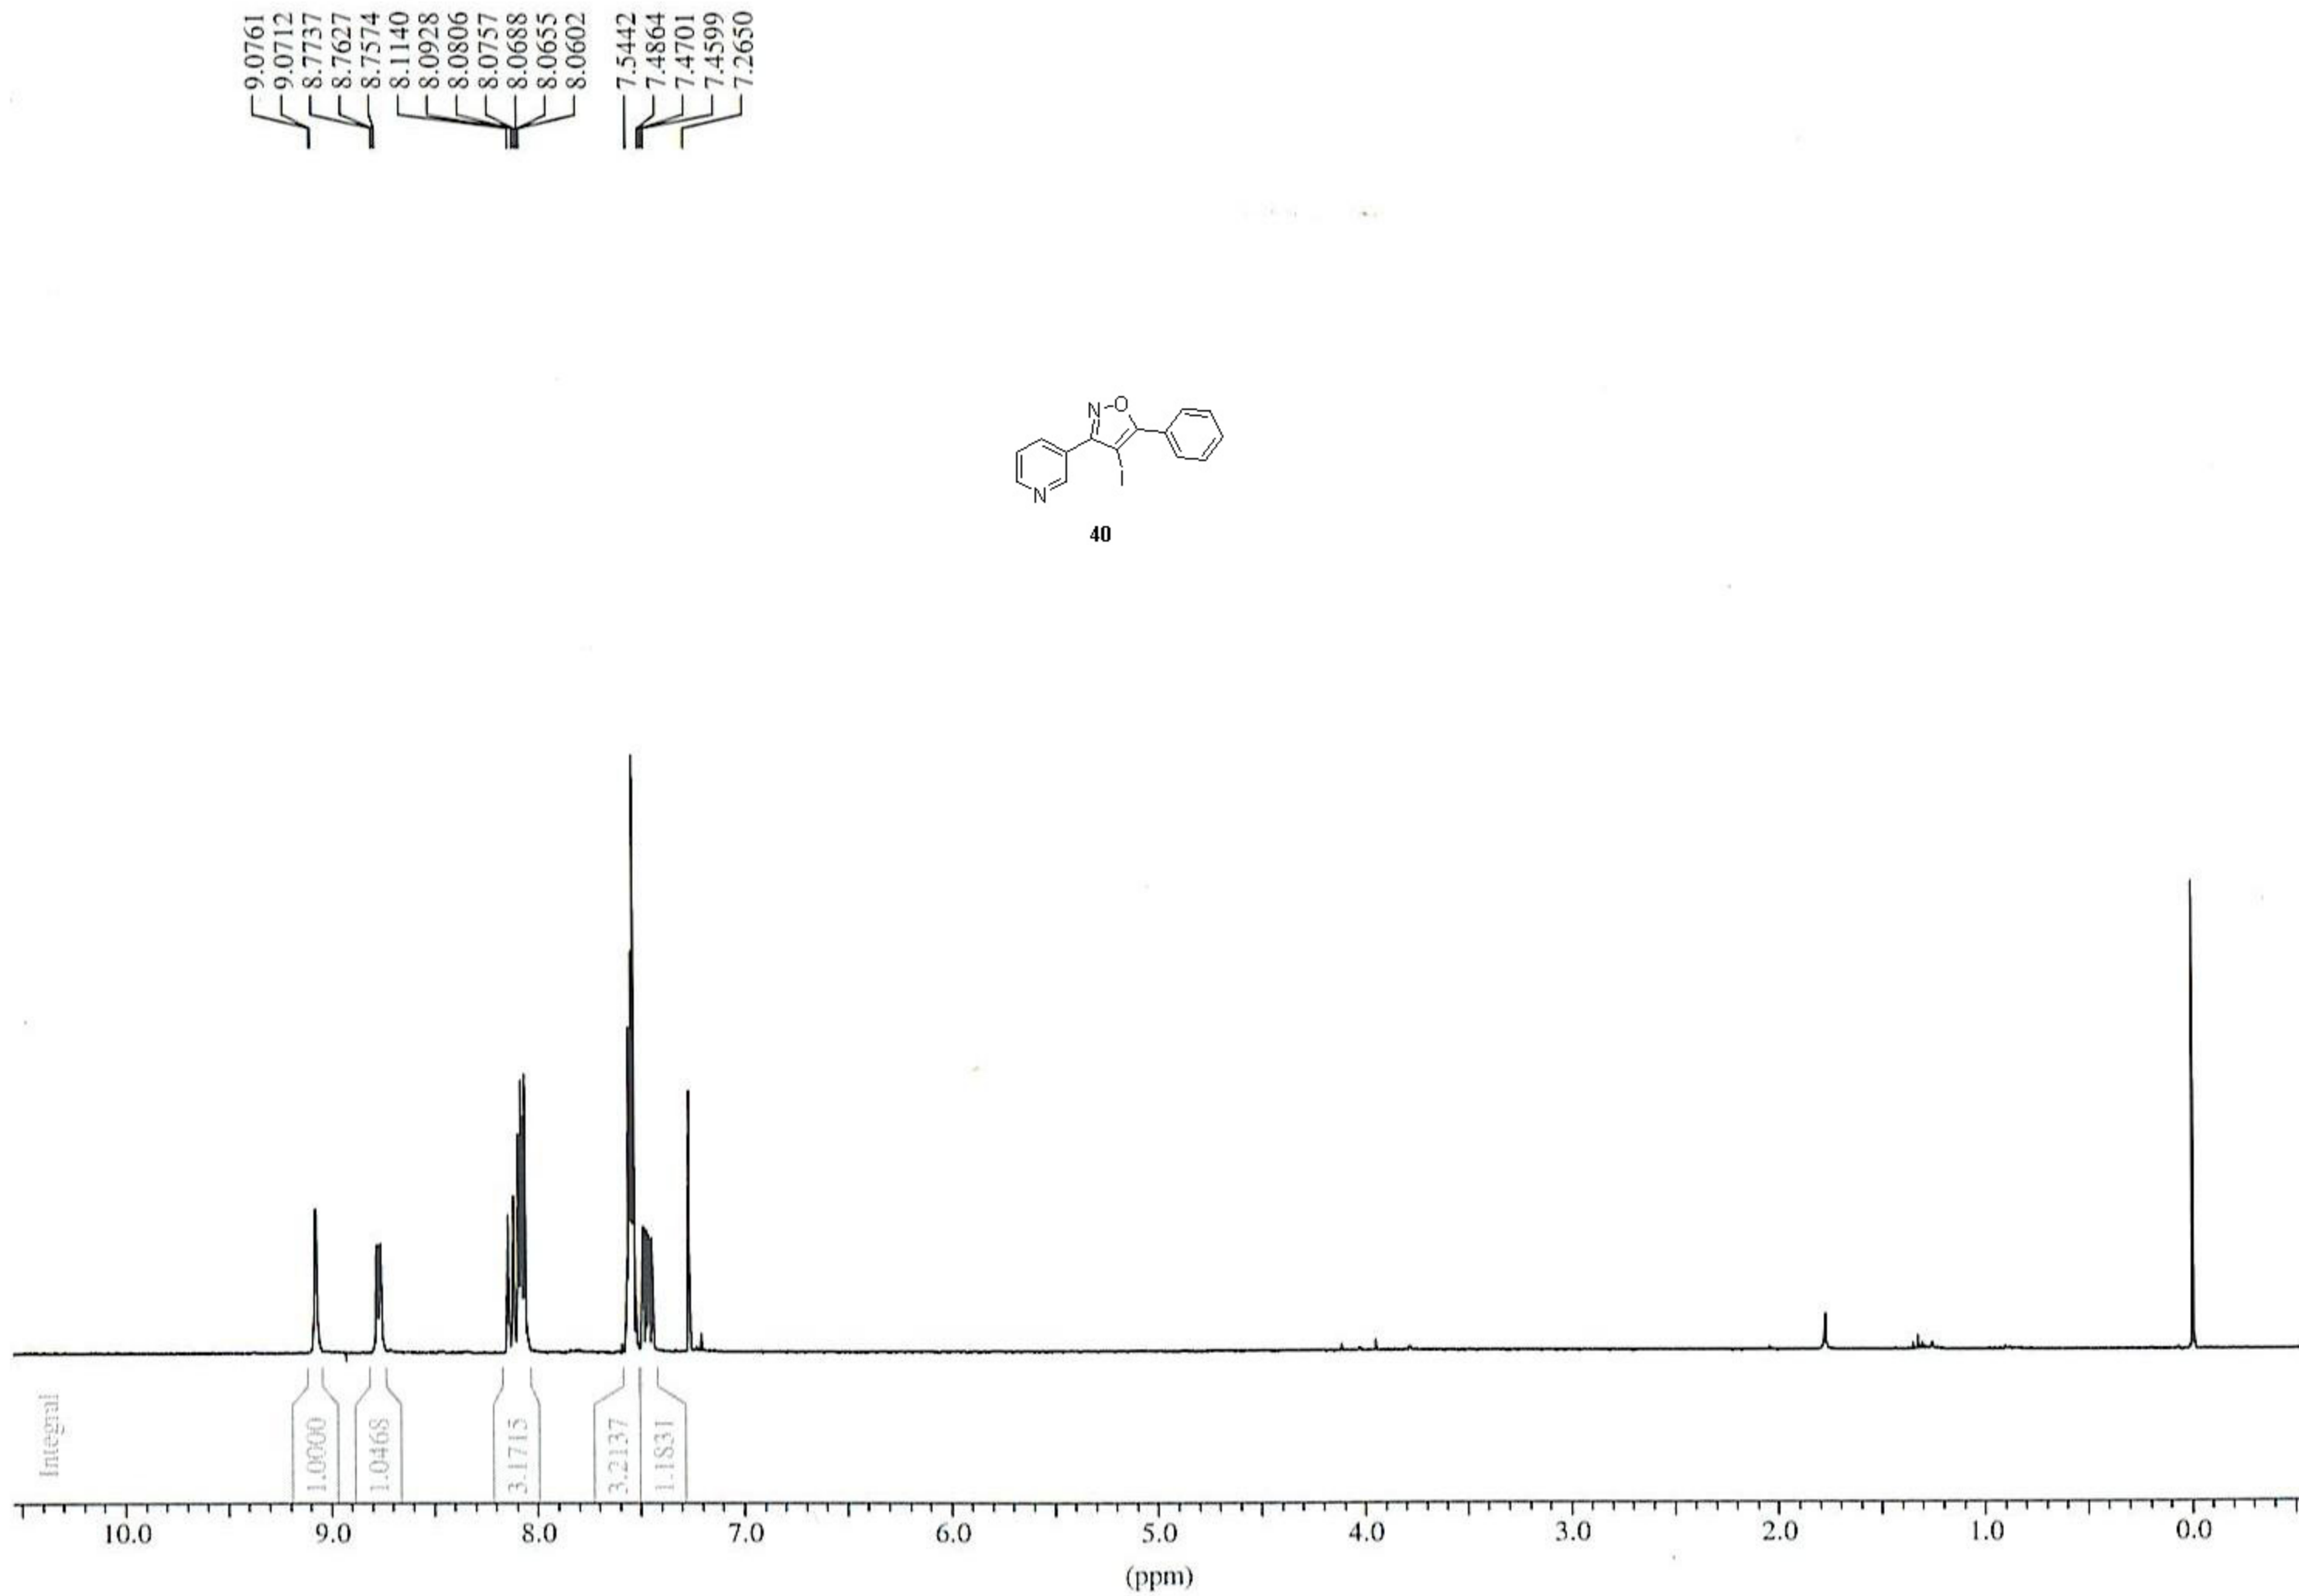

— 169.7407

— 162.6924

— 151.3203

— 149.8316

— 136.5719

— 131.1939

— 129.0641

— 127.9743

— 127.1409

— 125.2960

— 123.5366

— 77.6815

— 77.2577

— 76.8338

— 55.7708

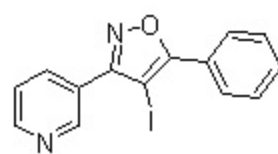

40

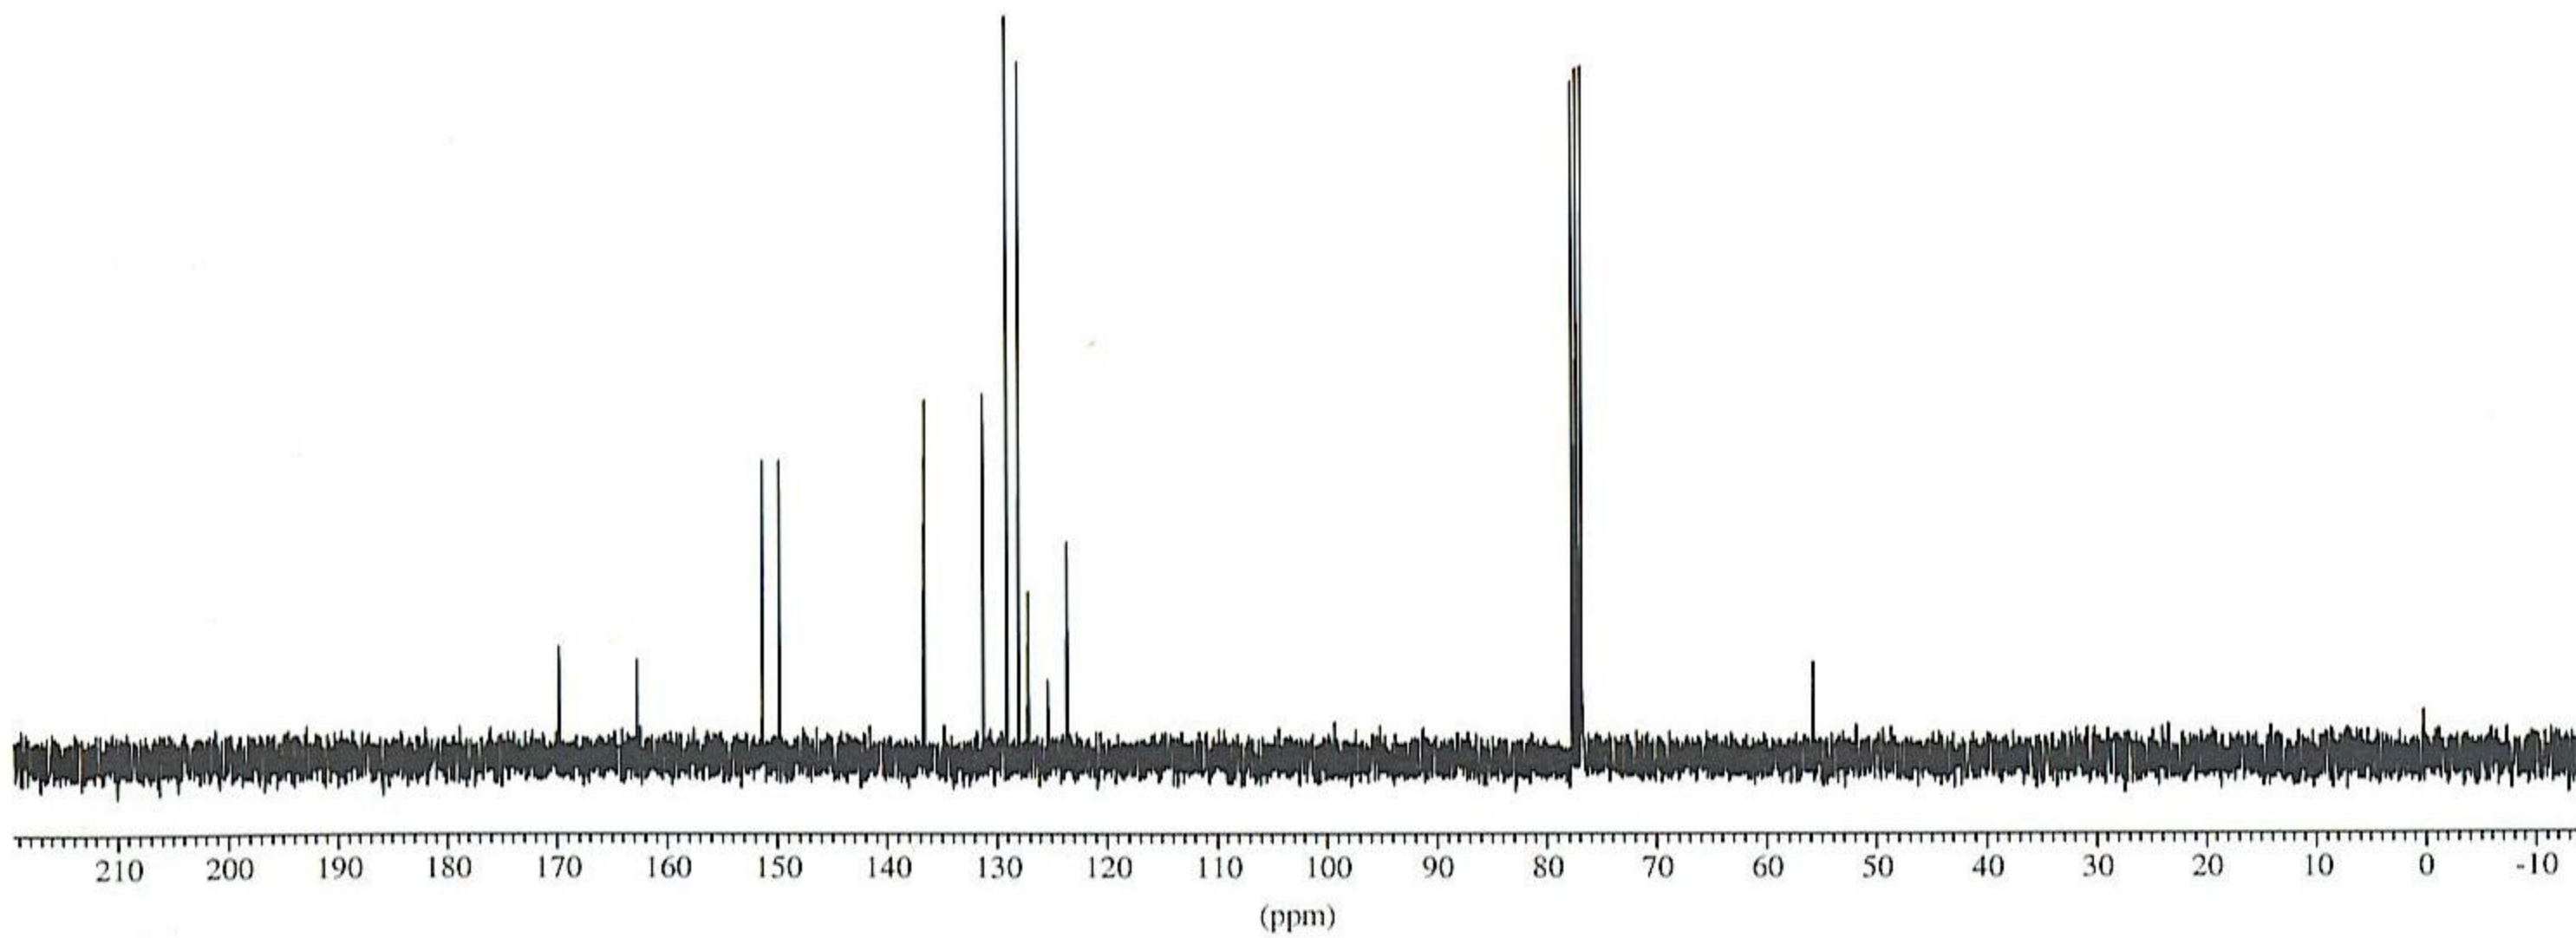

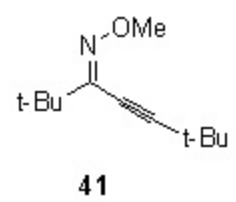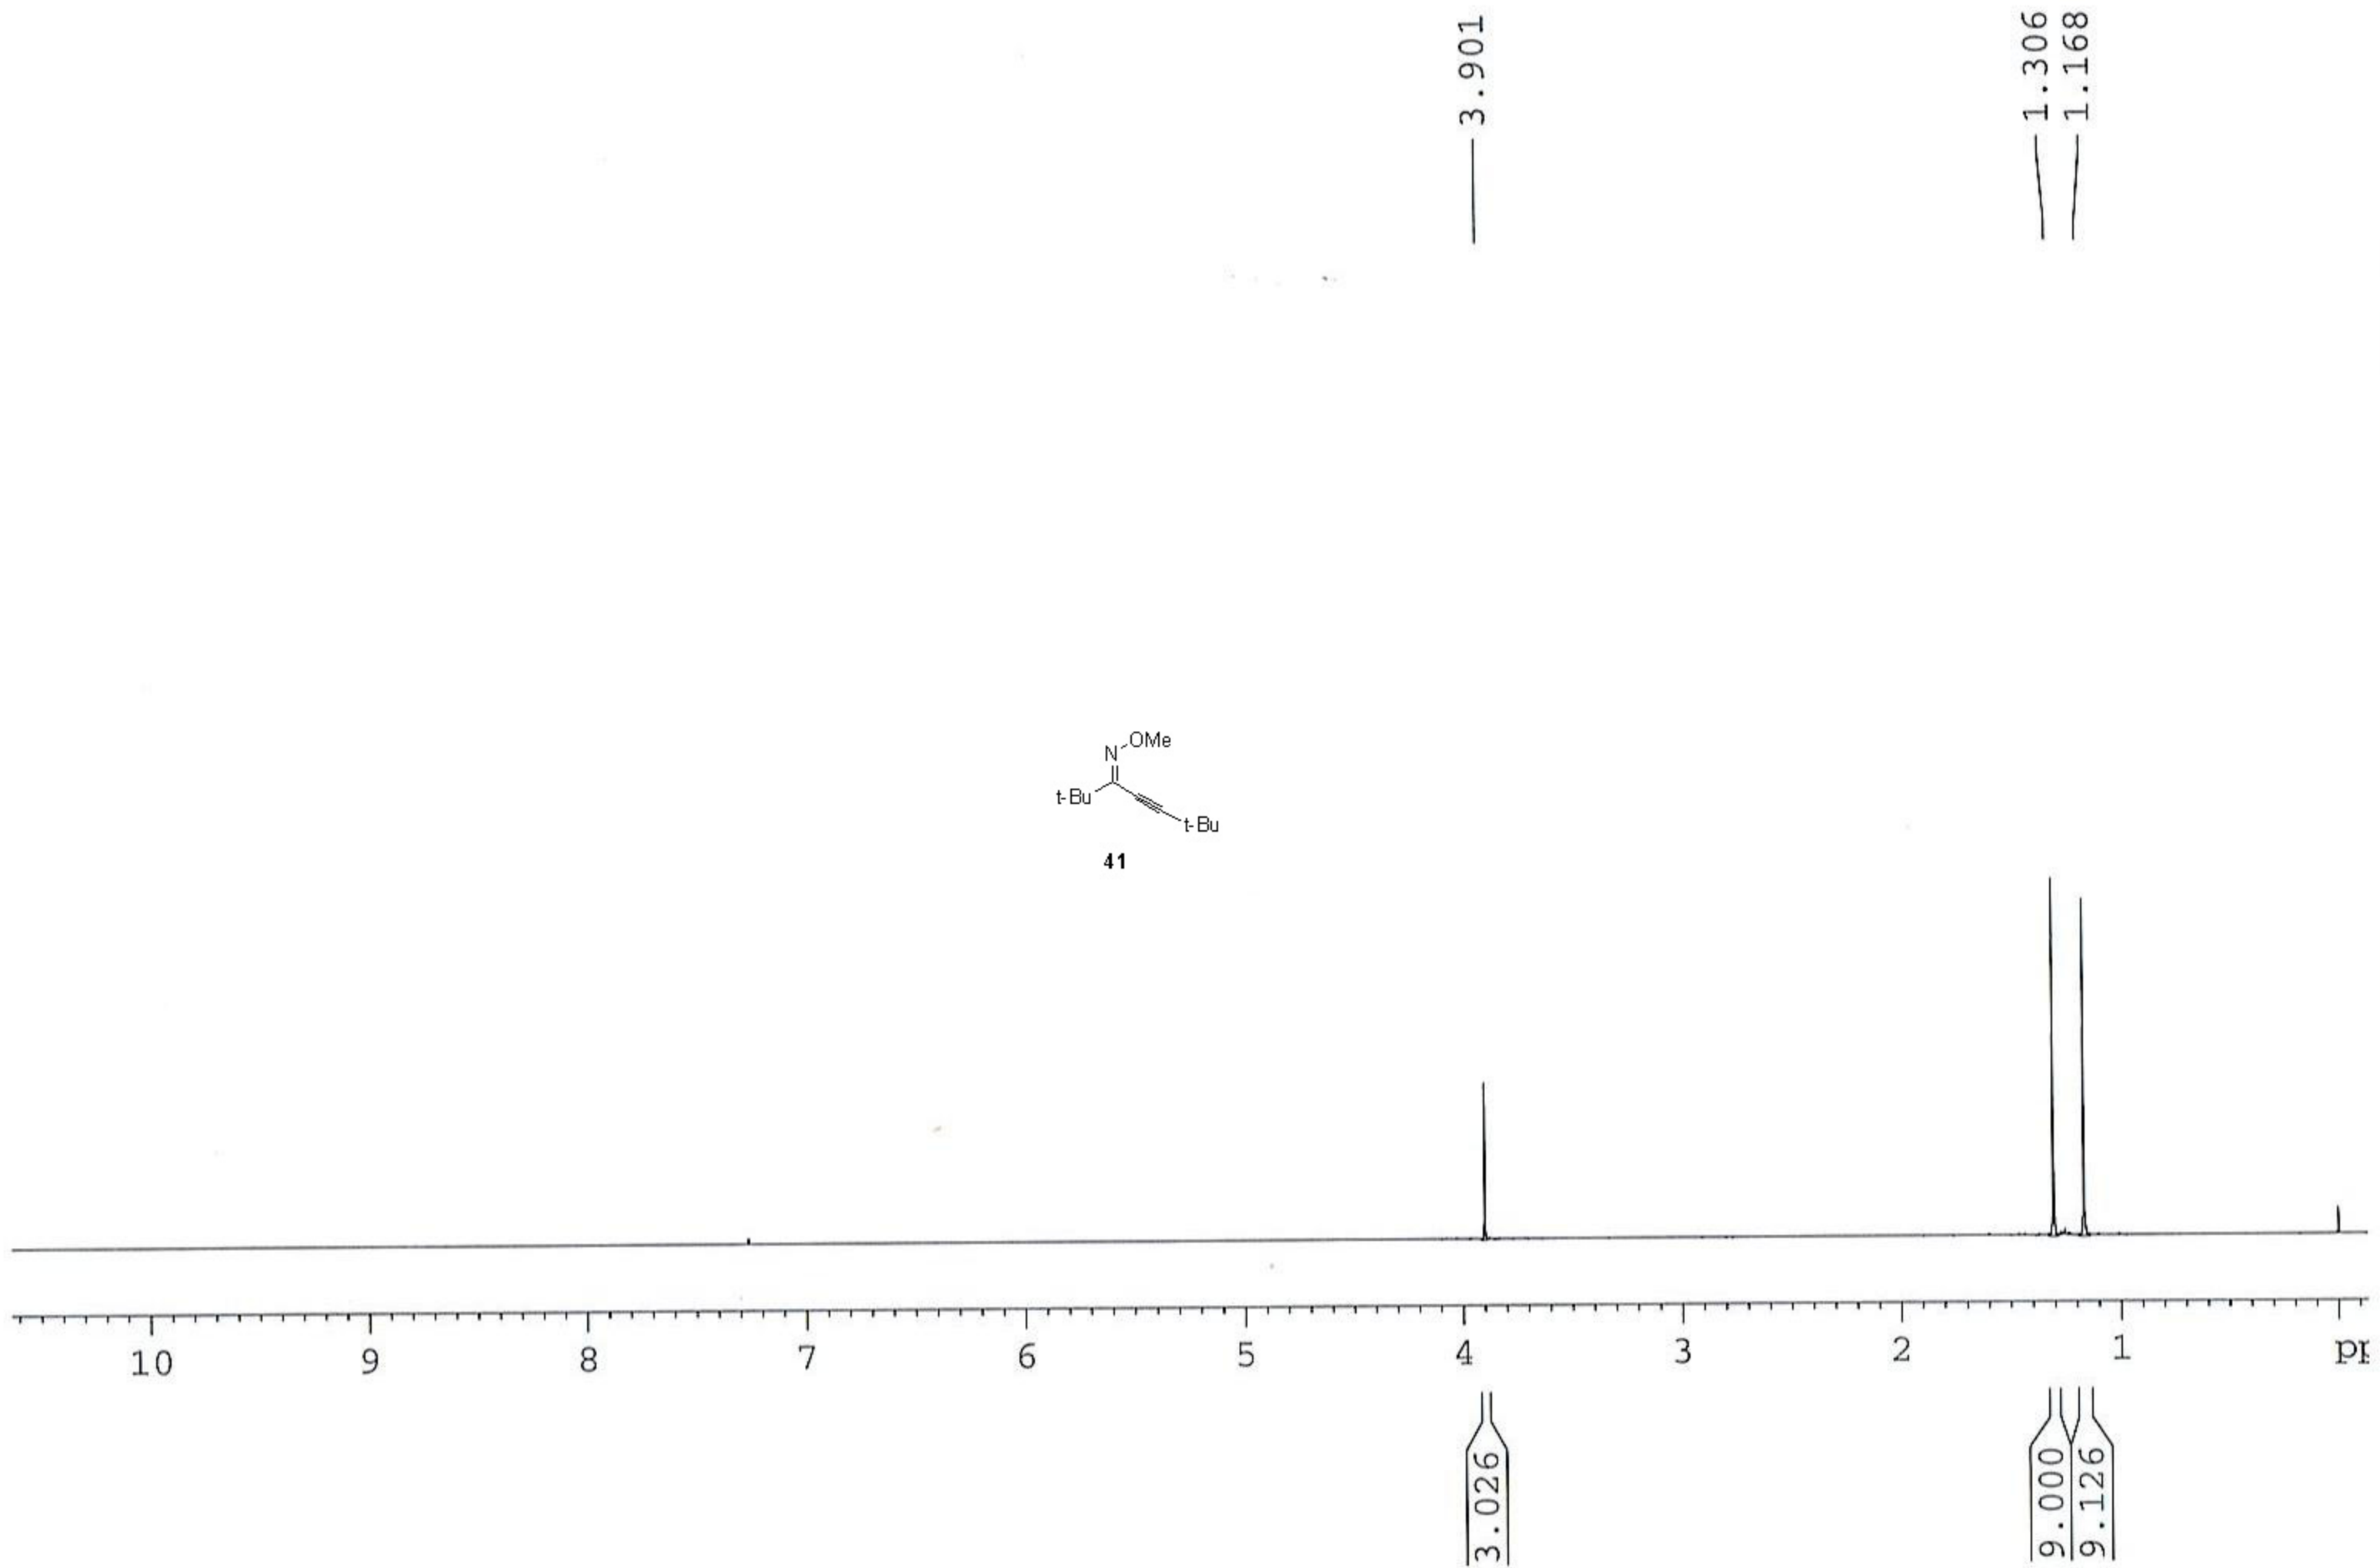

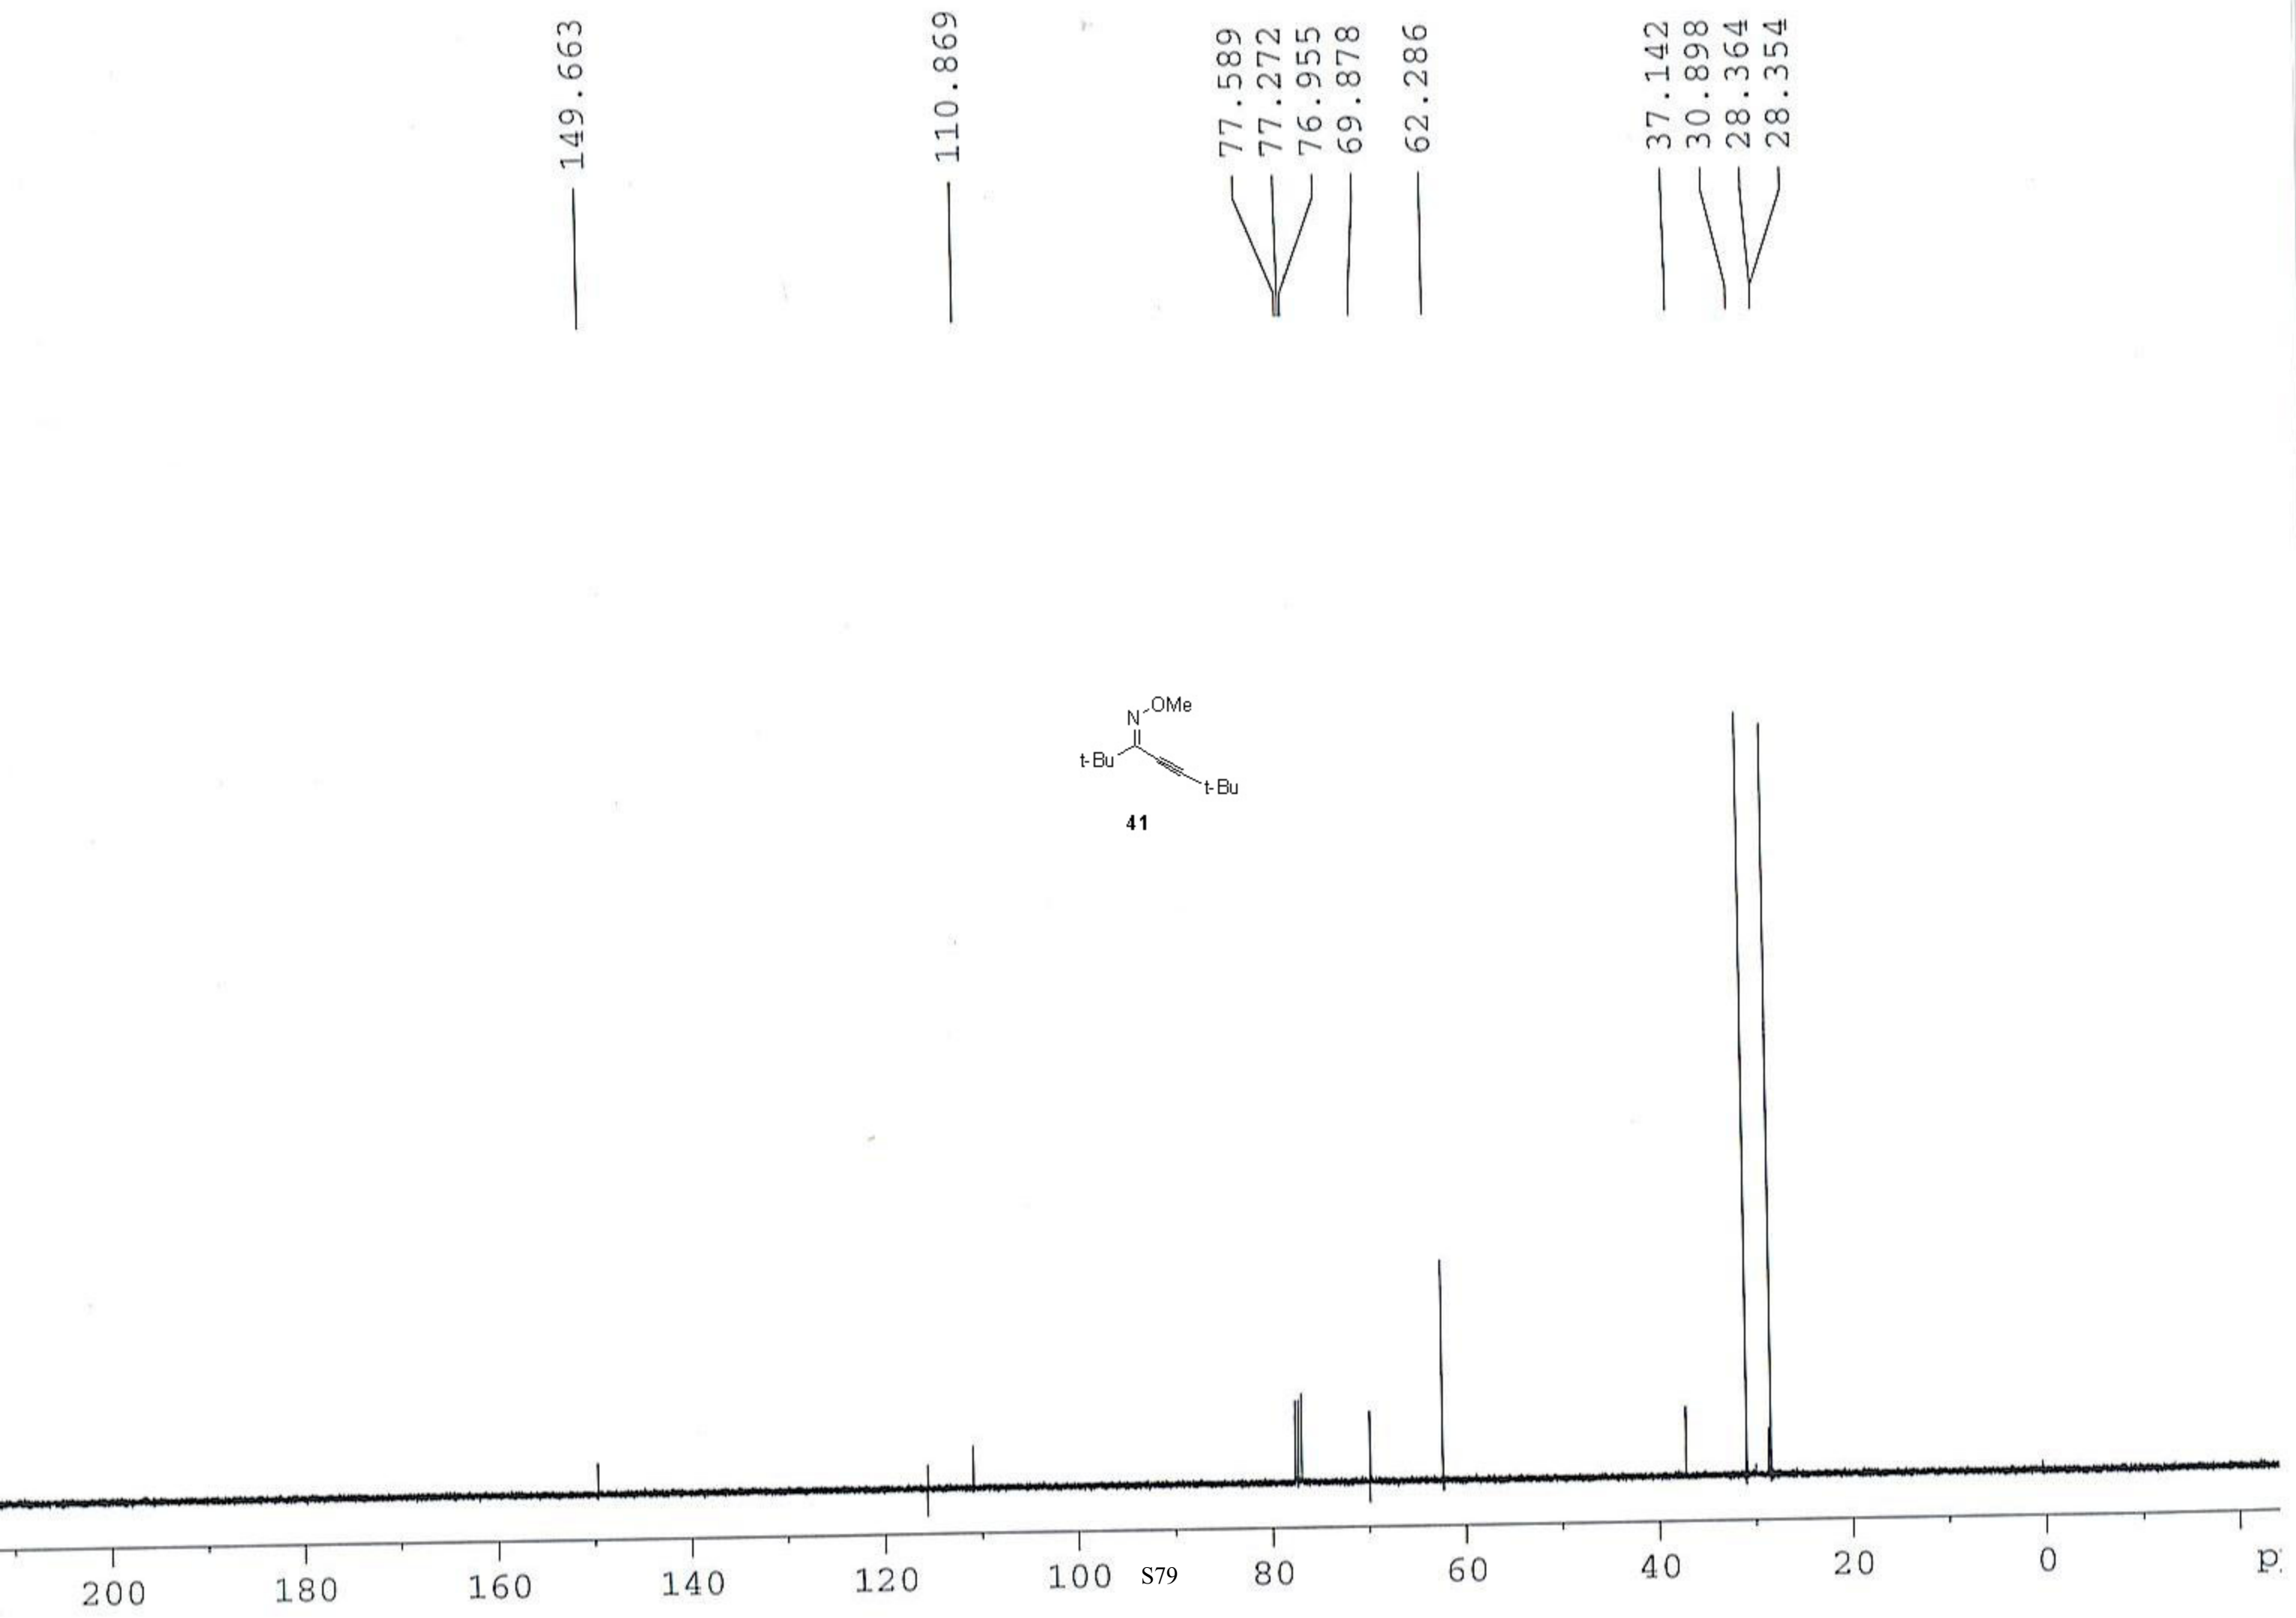

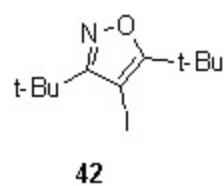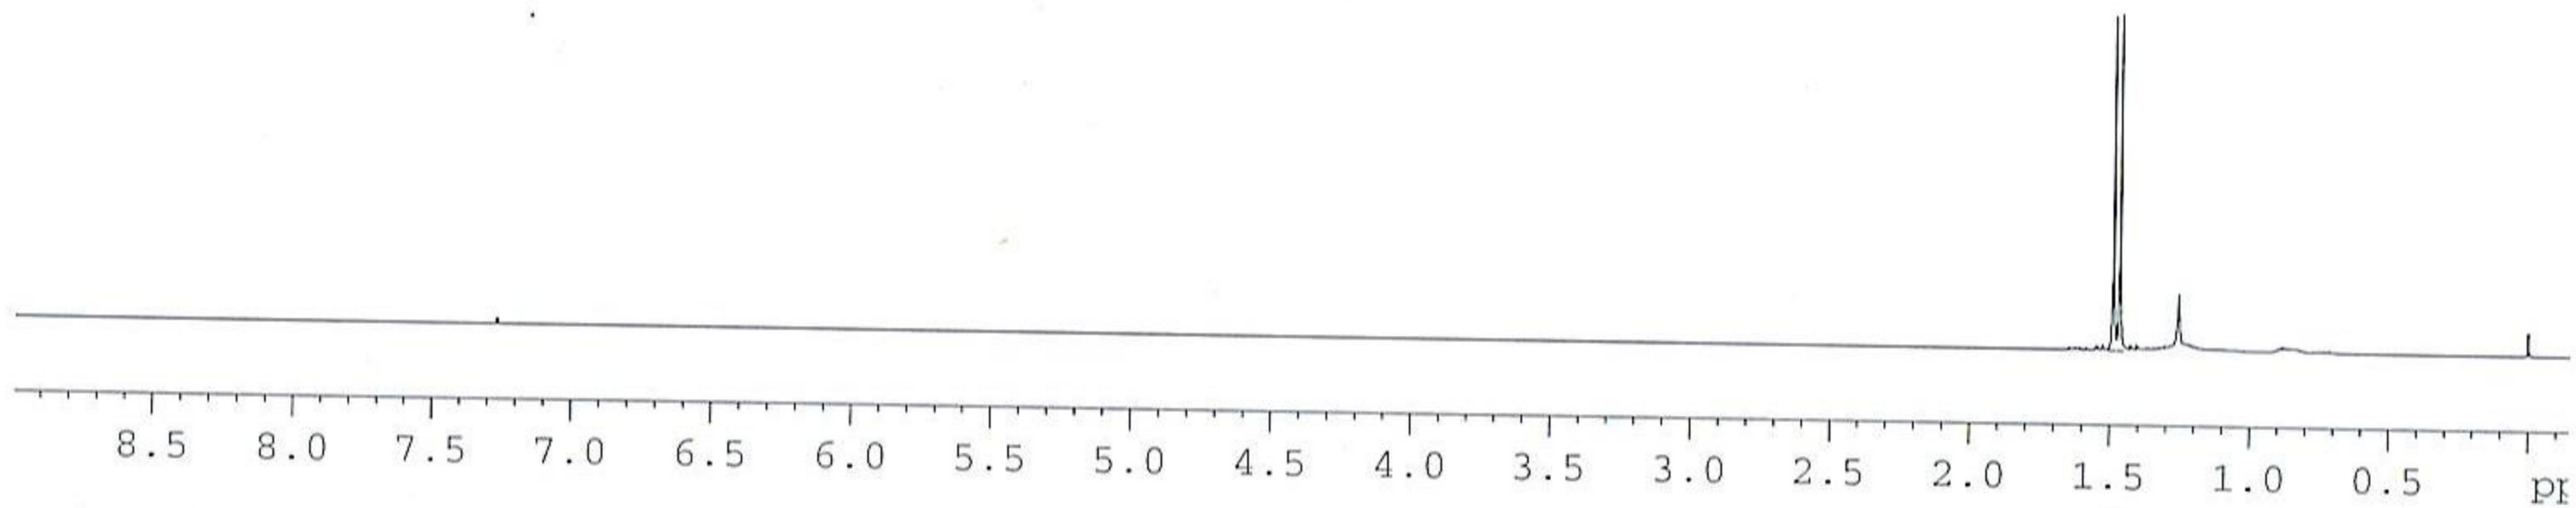

1.488  
1.466

9.000  
9.073



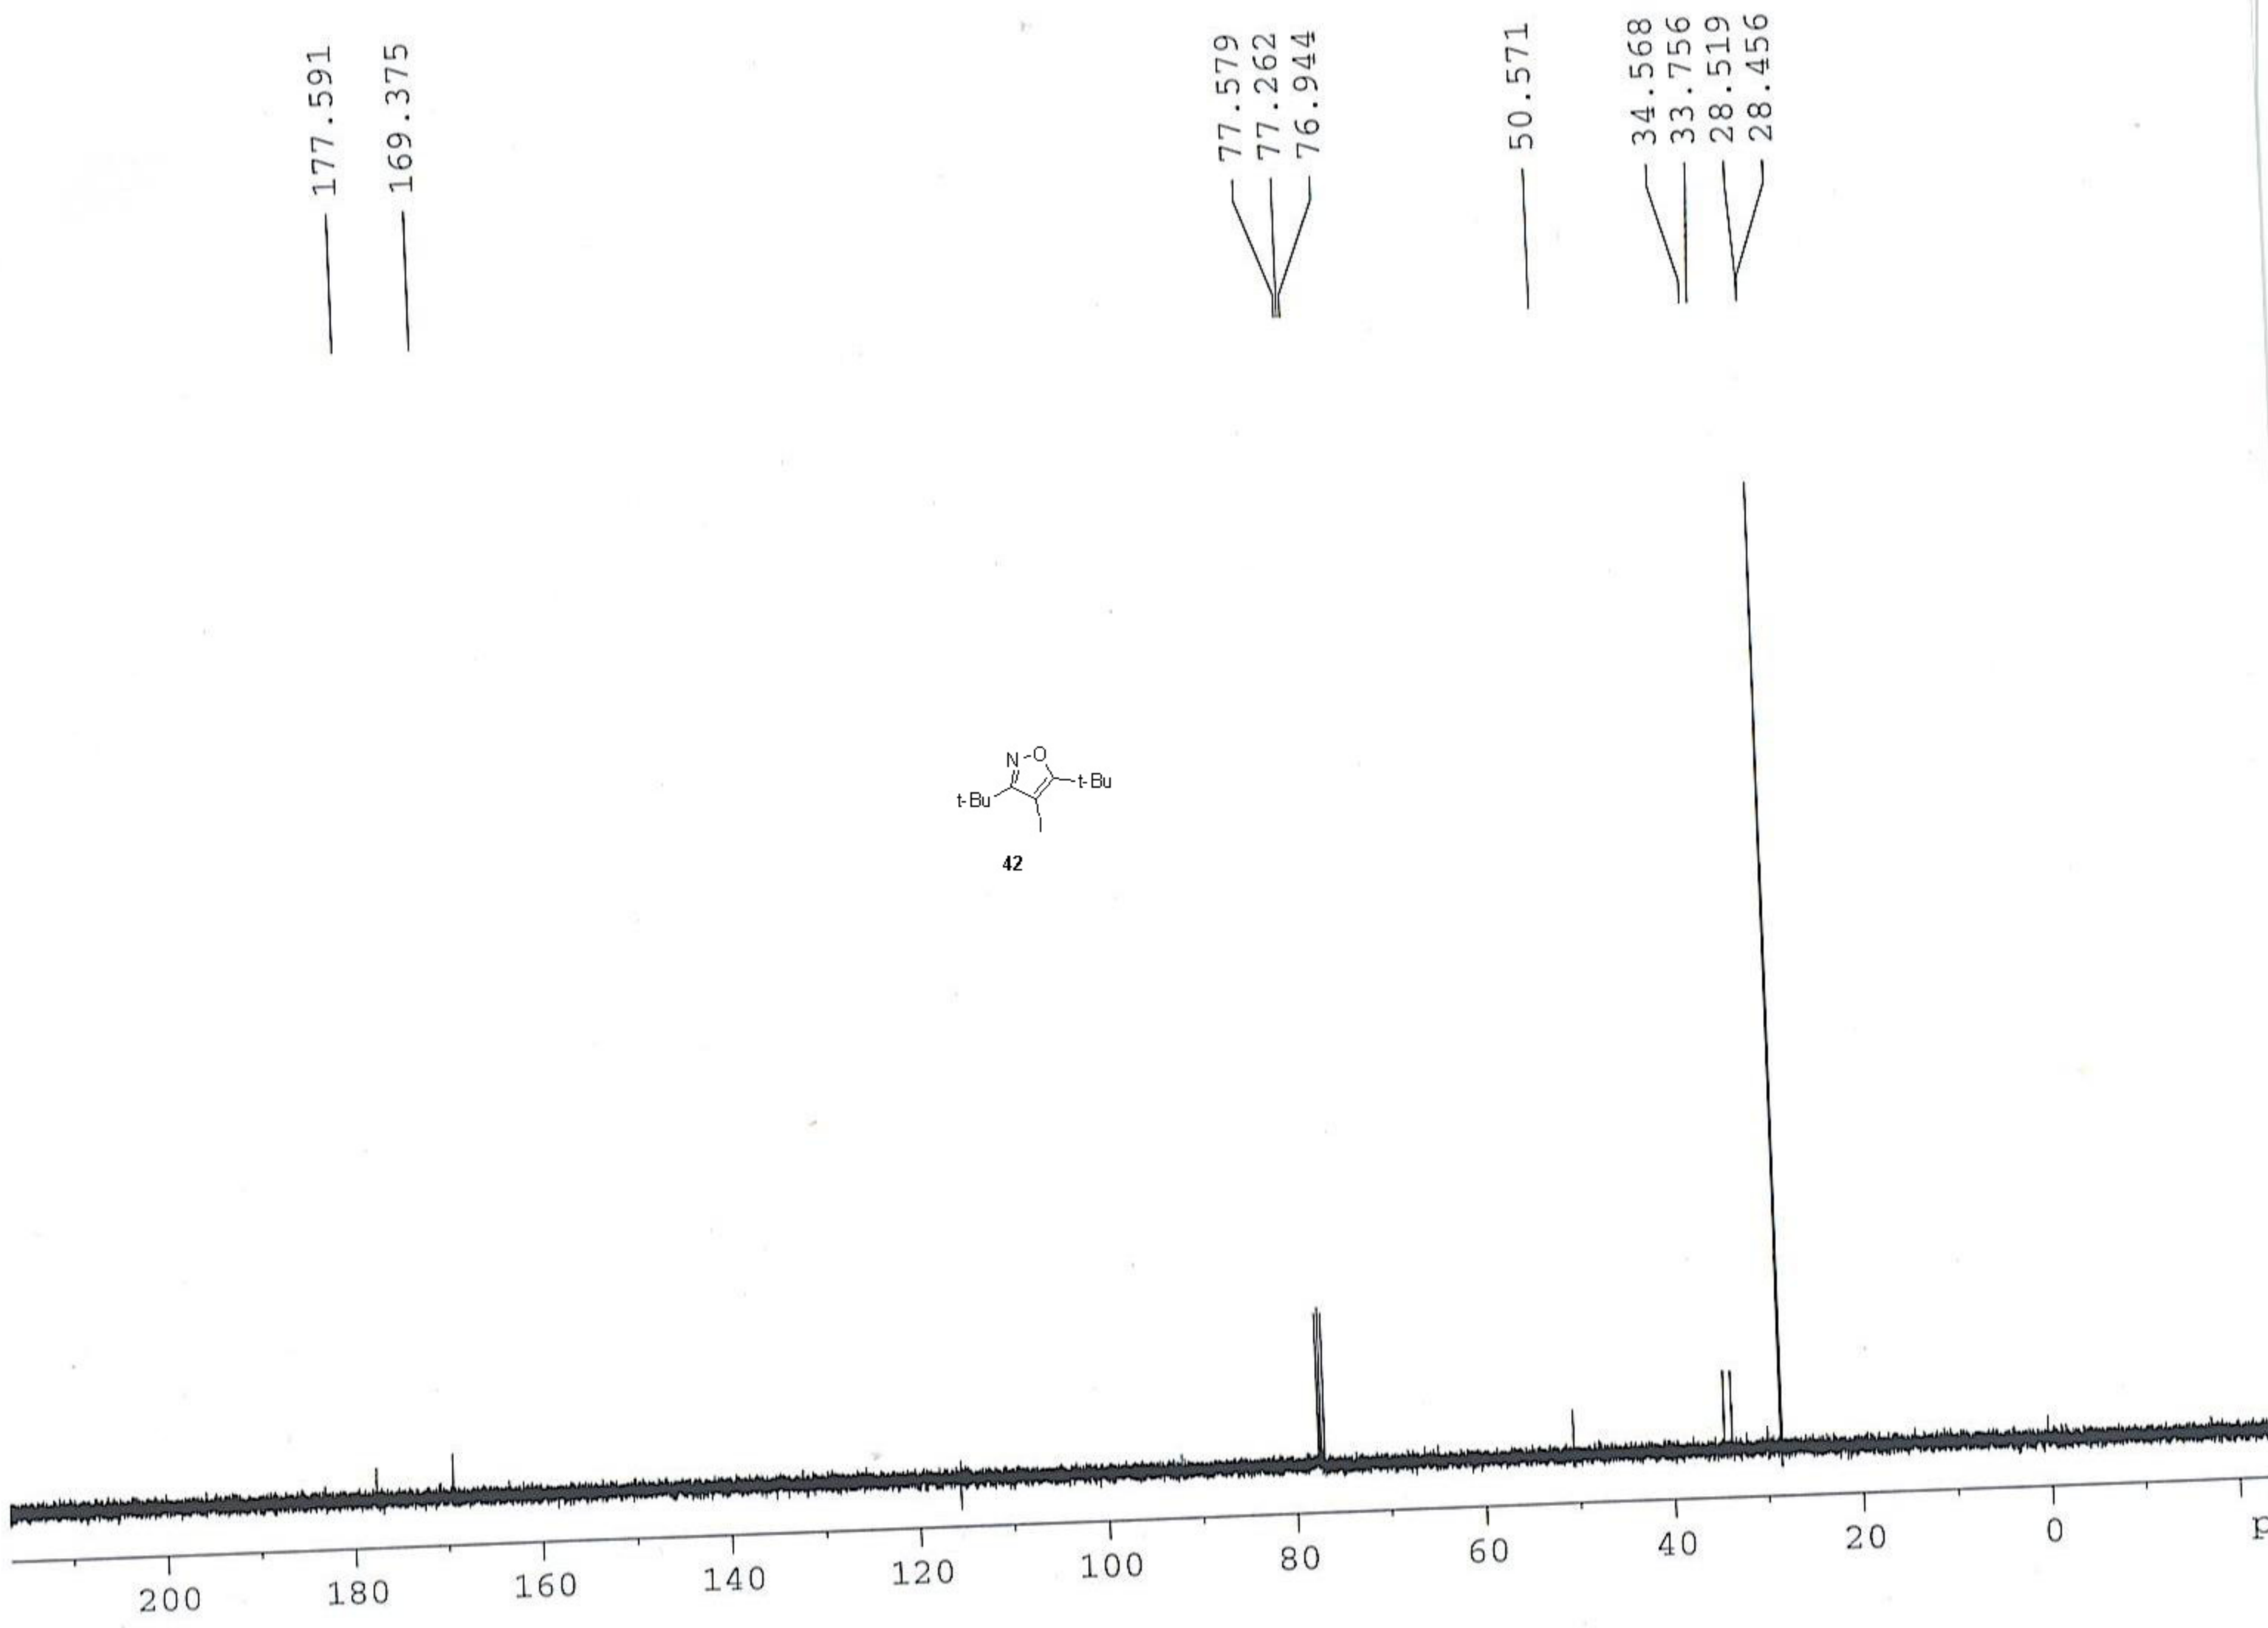

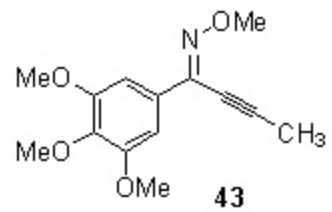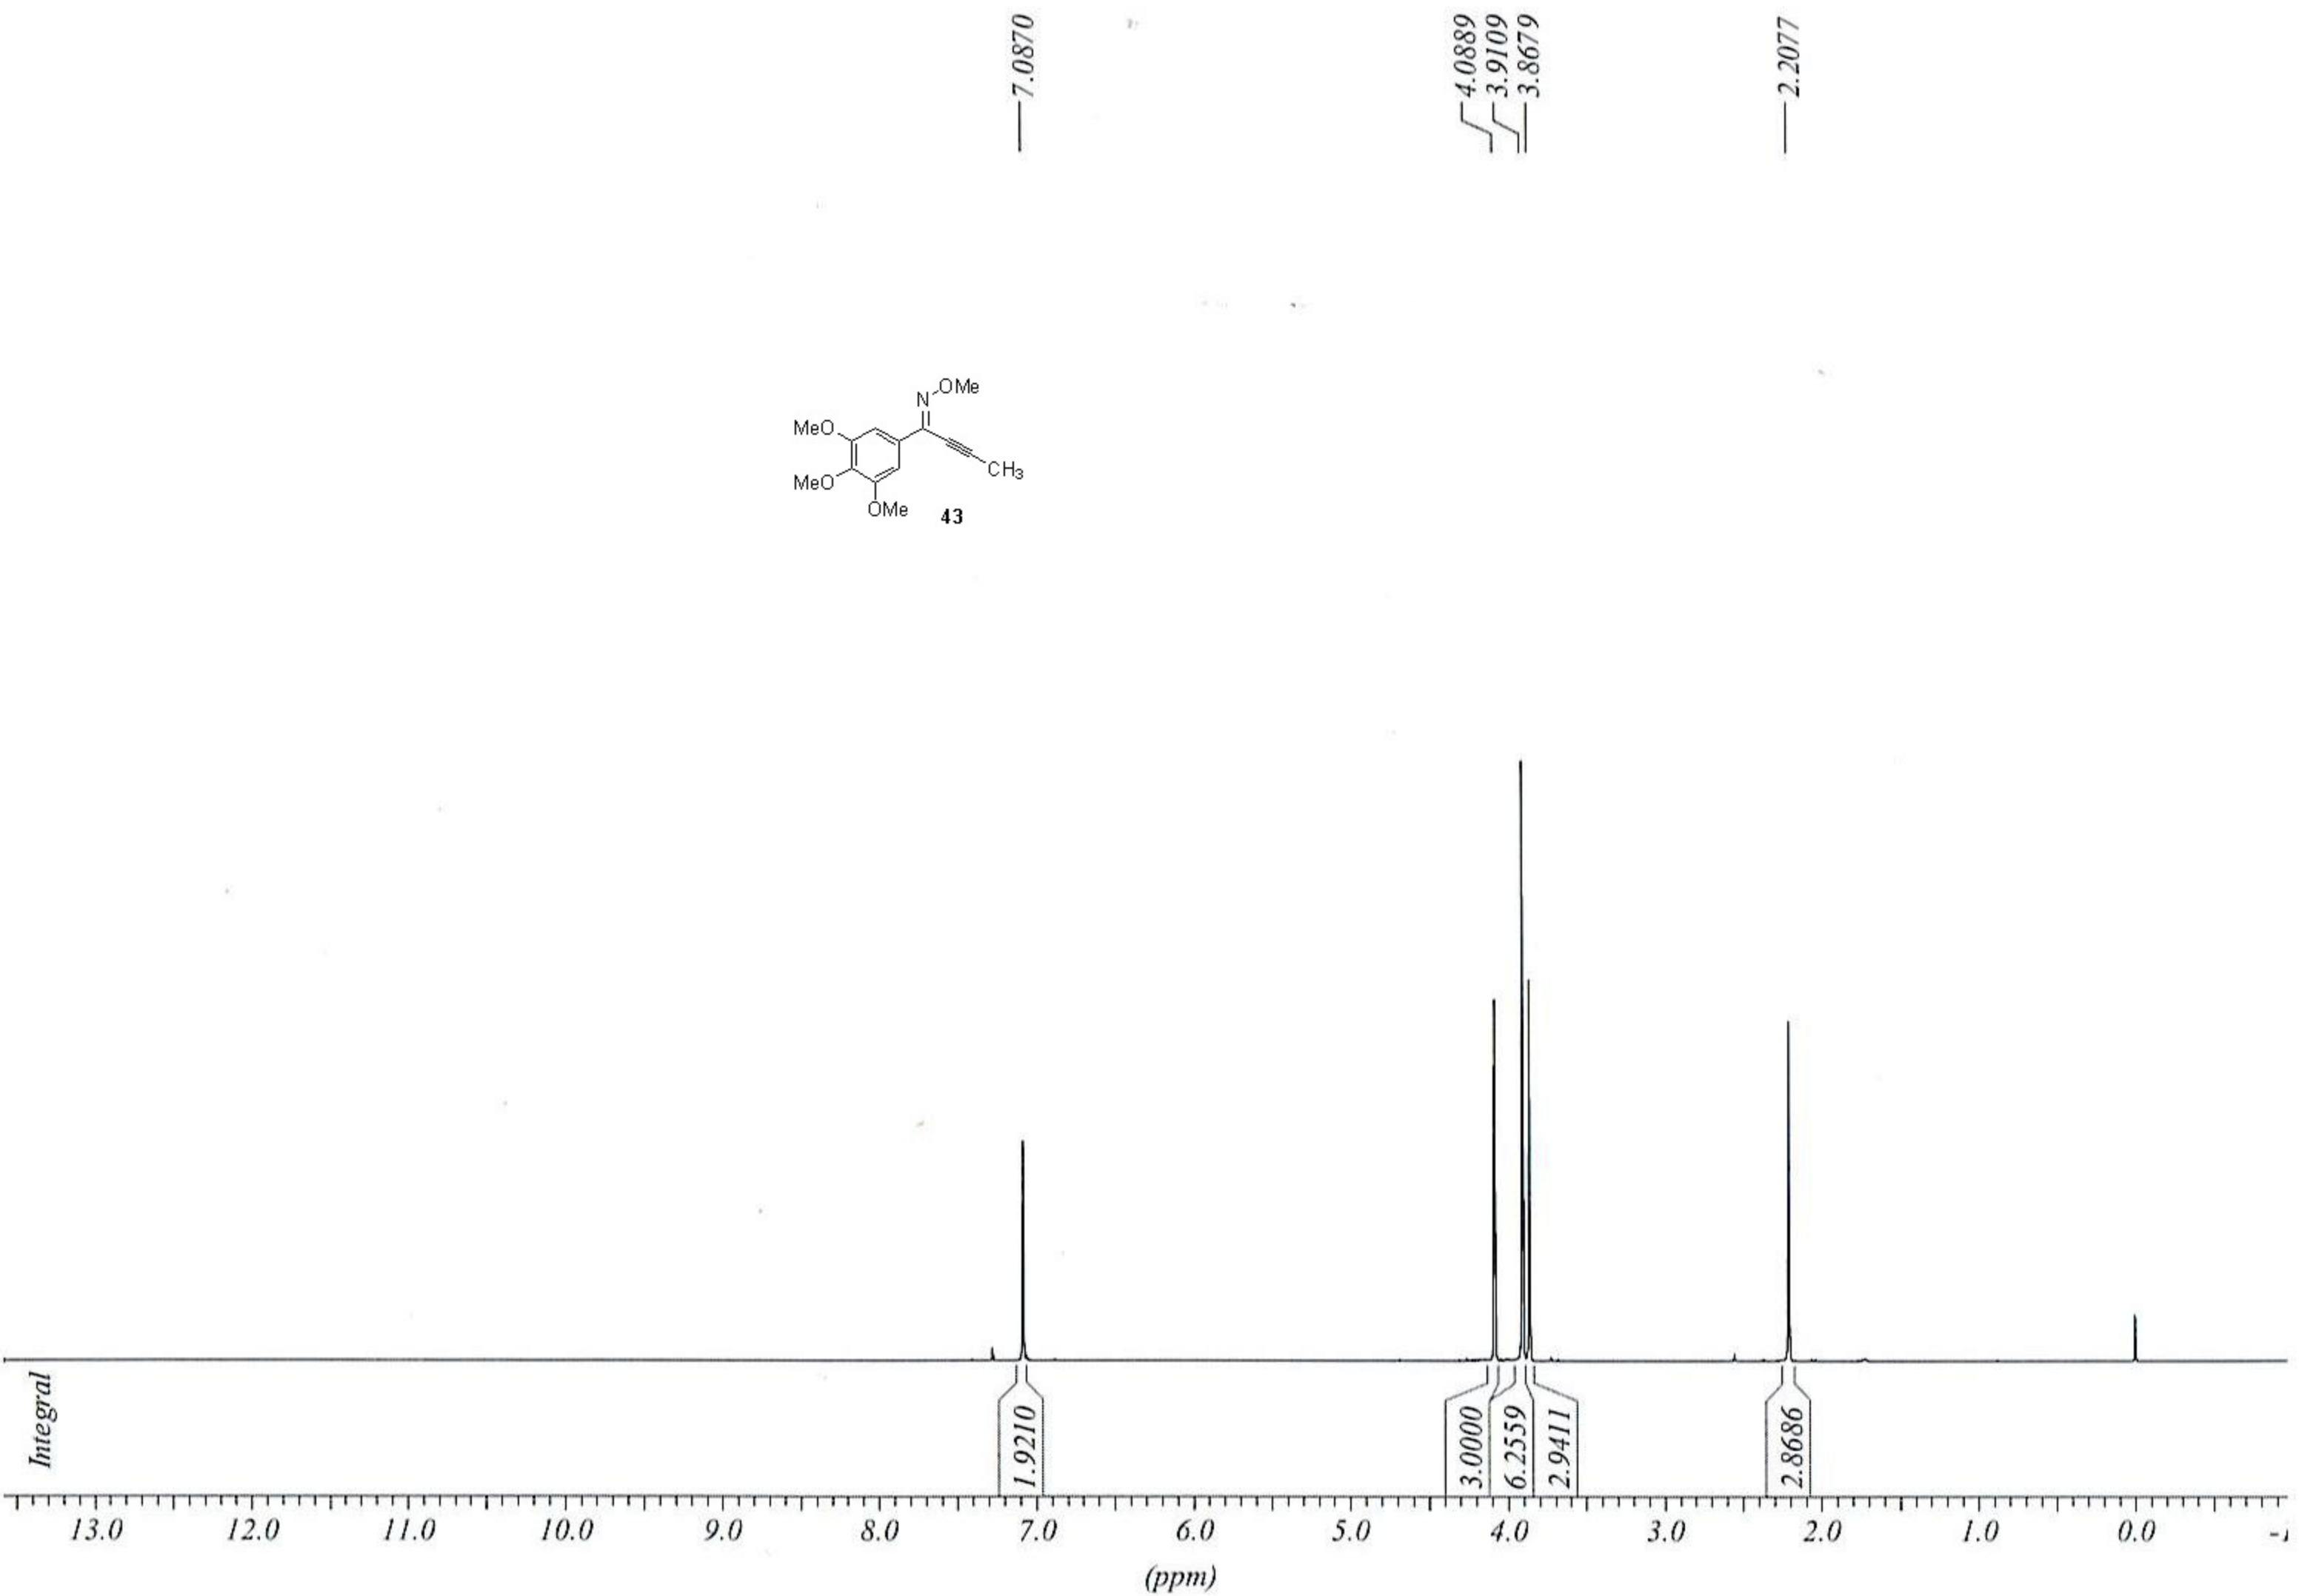

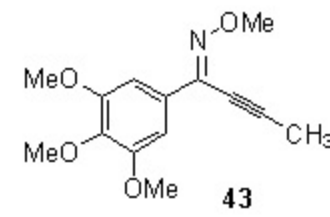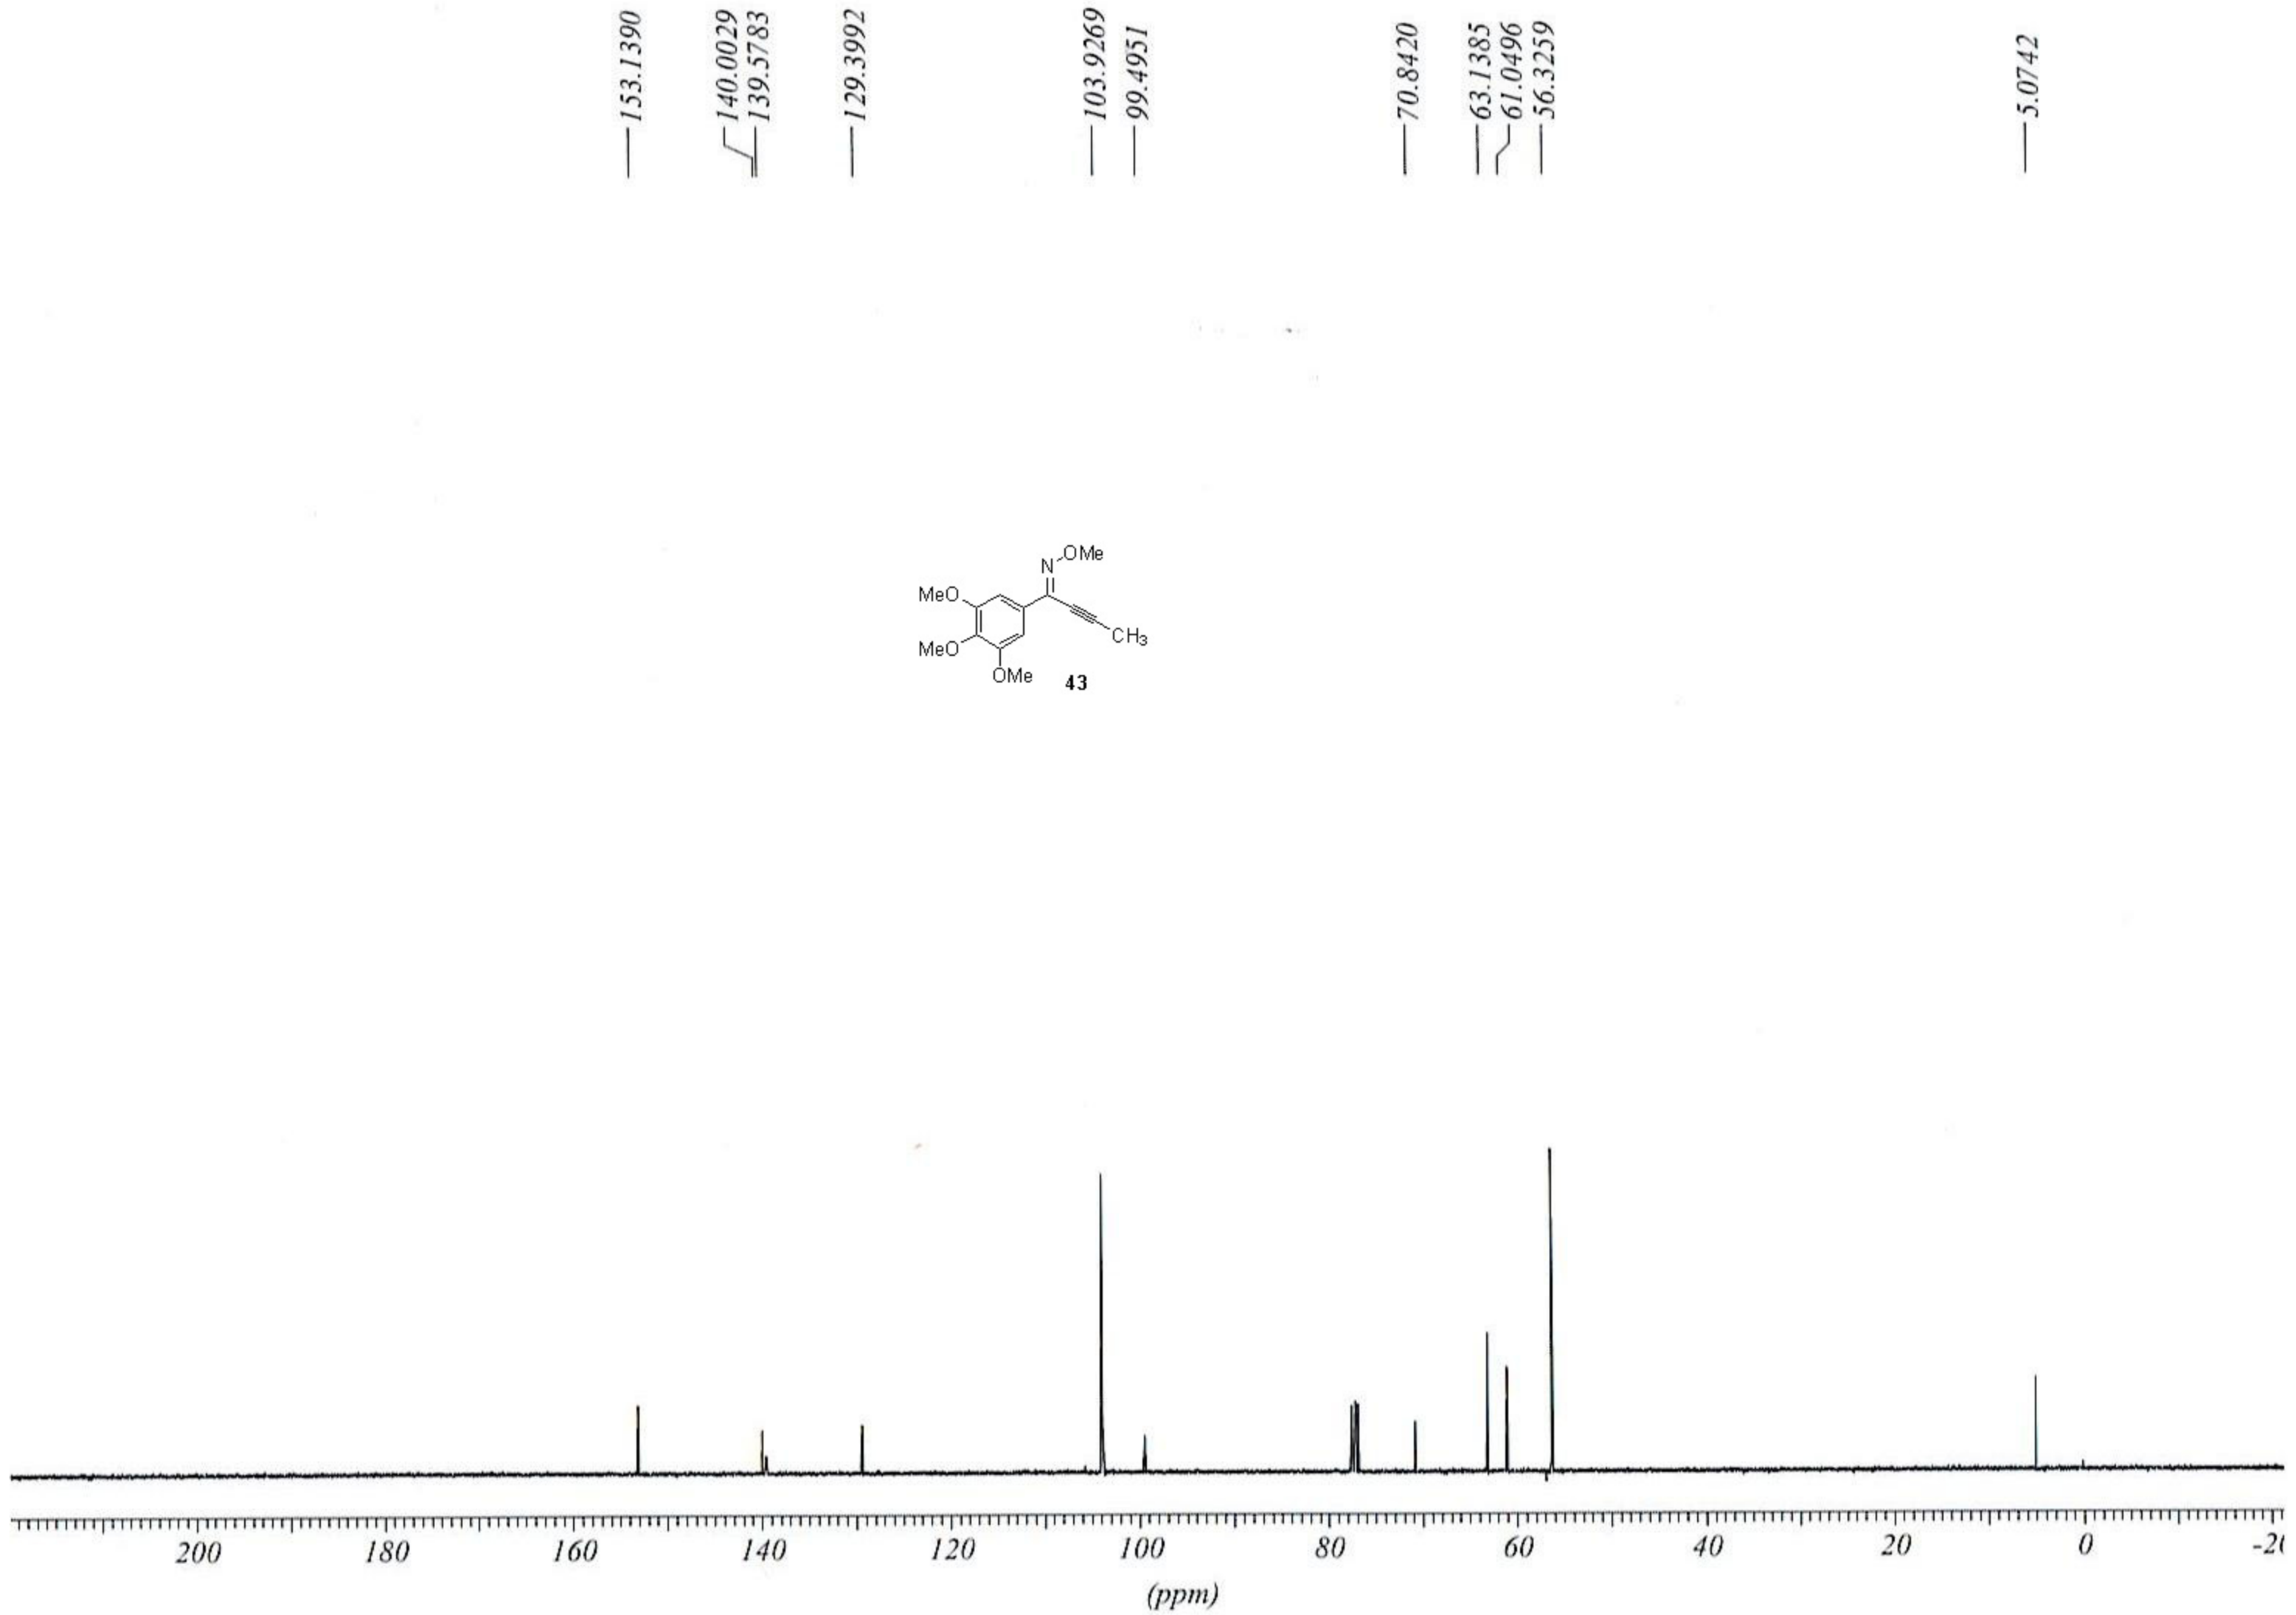

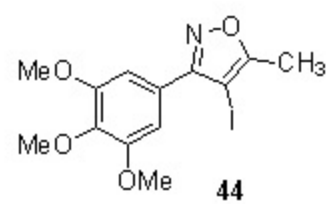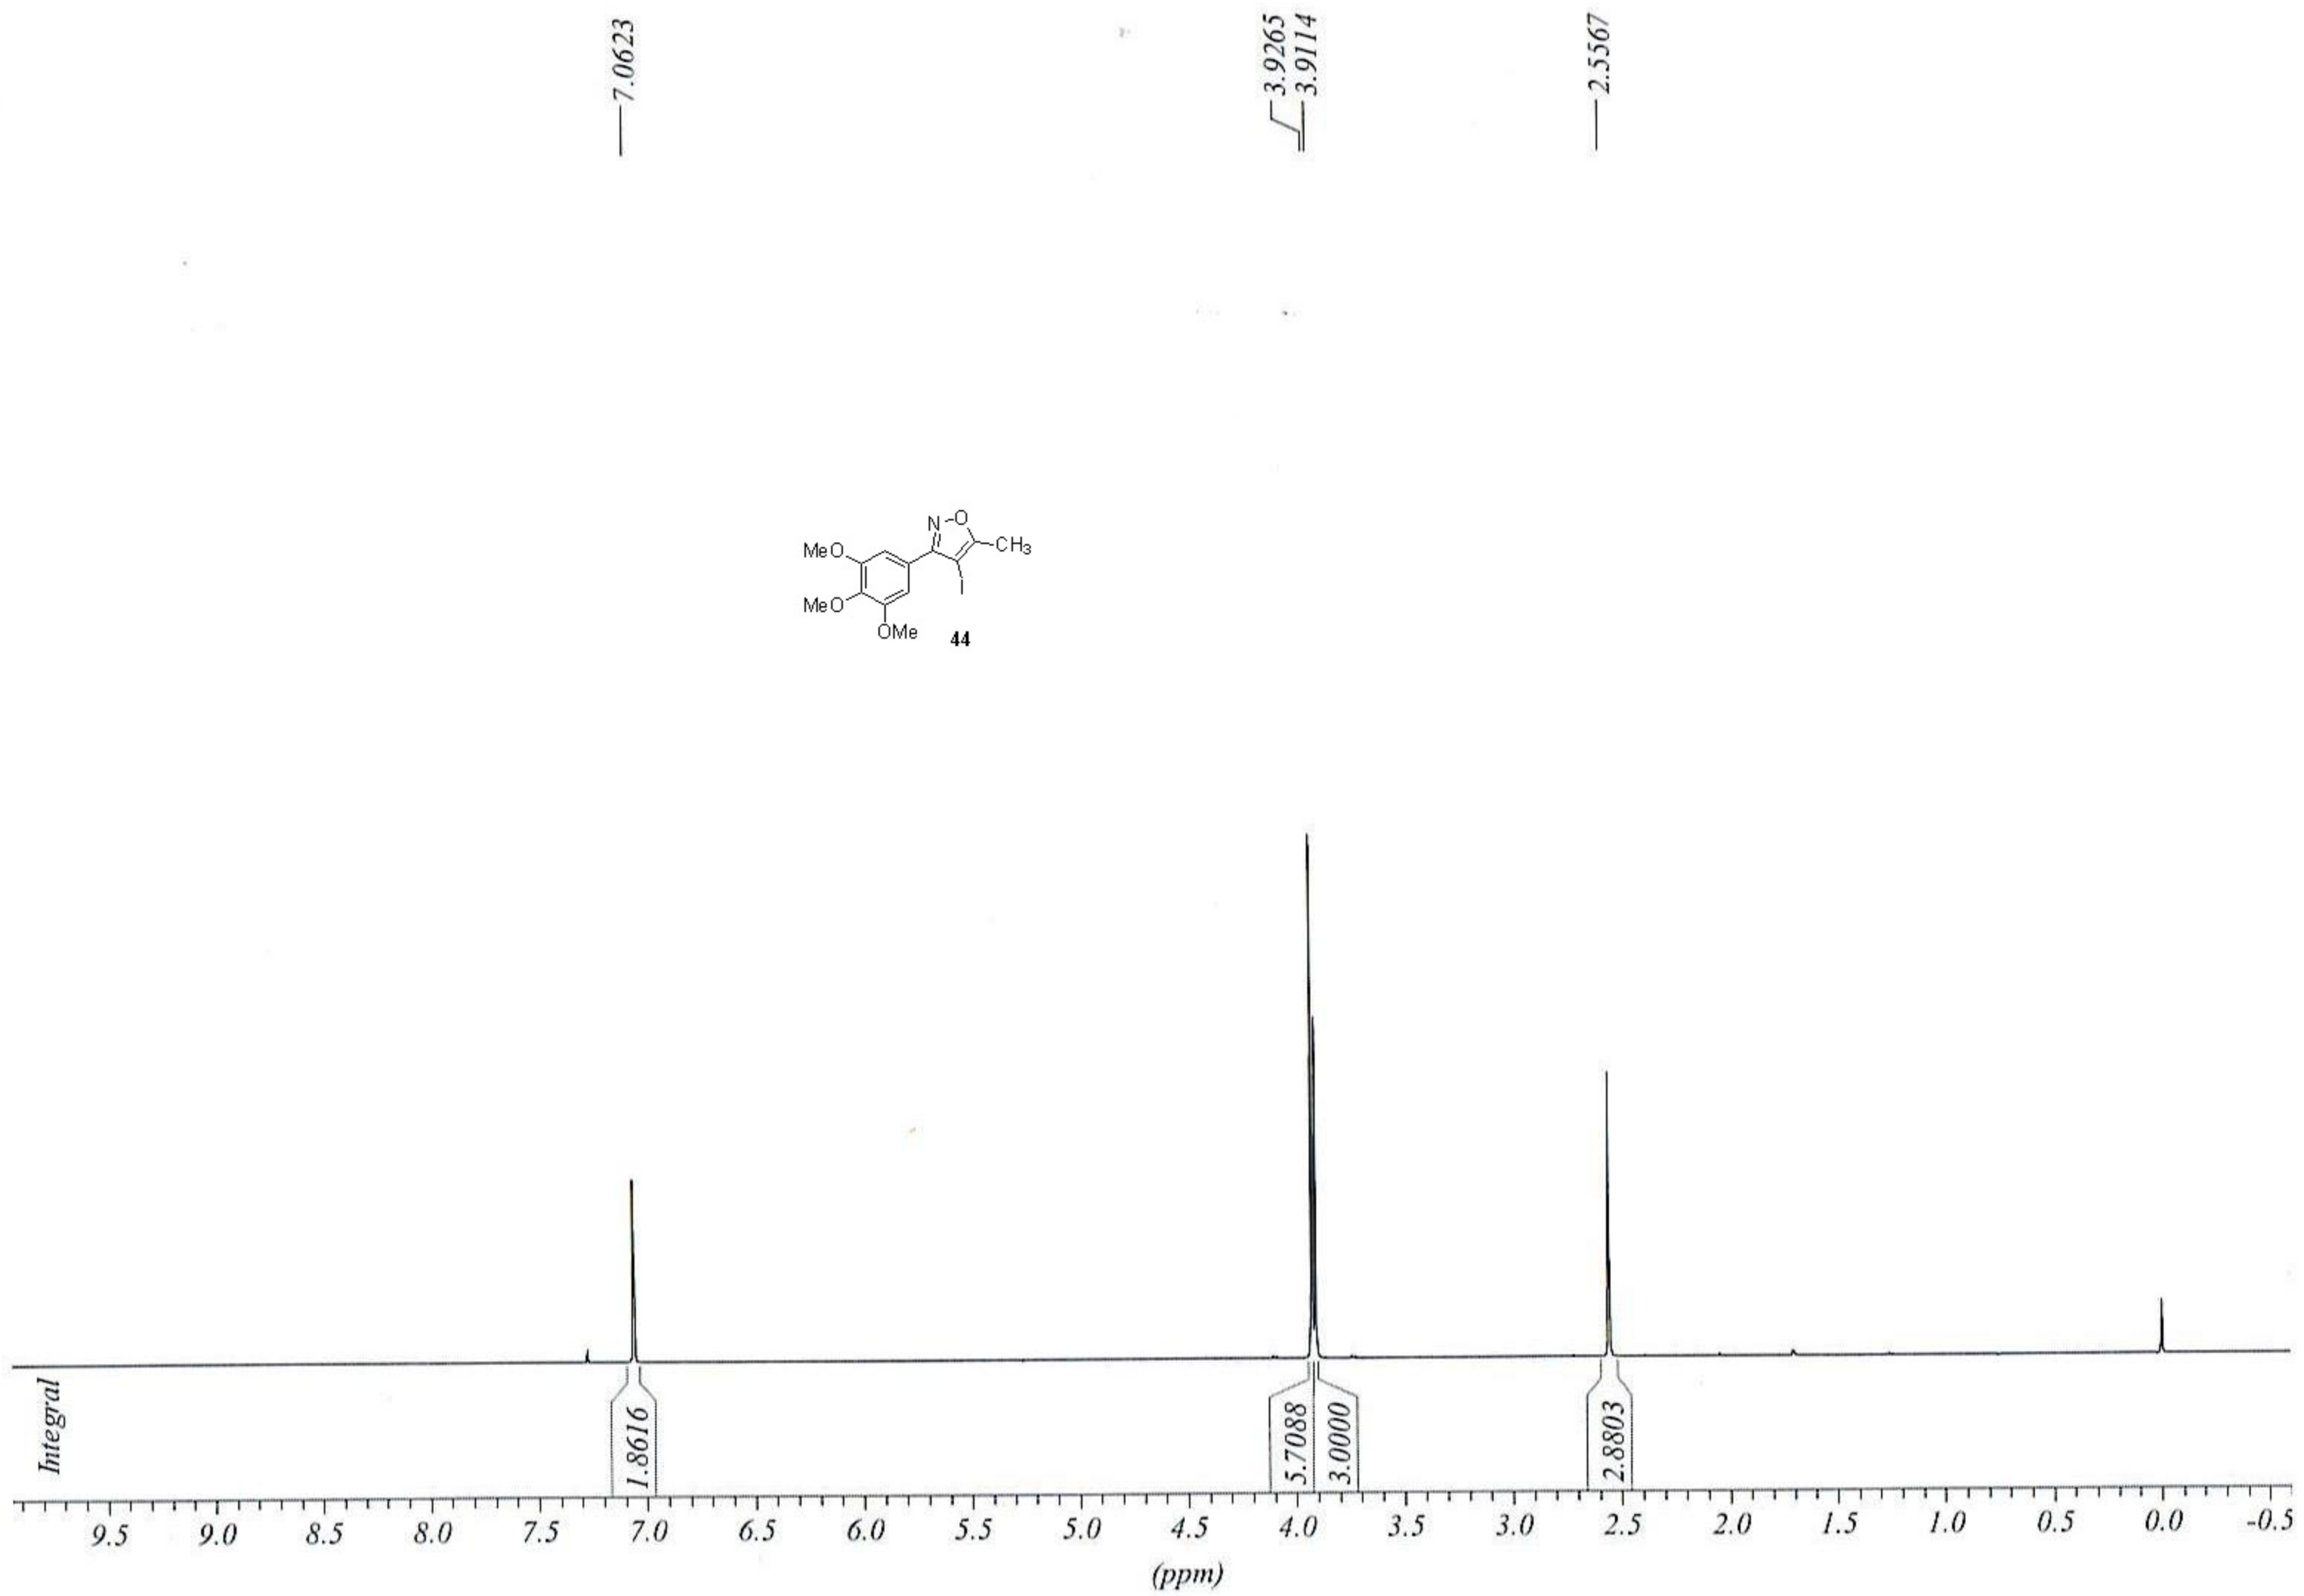

— 171.7381

— 162.3817

— 153.3741

— 139.5518

— 124.0235

— 105.8035

— 61.1103

— 57.8916

— 56.4017

— 13.1568

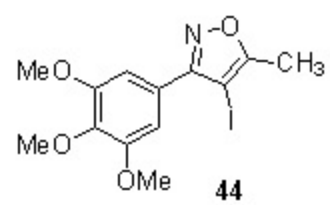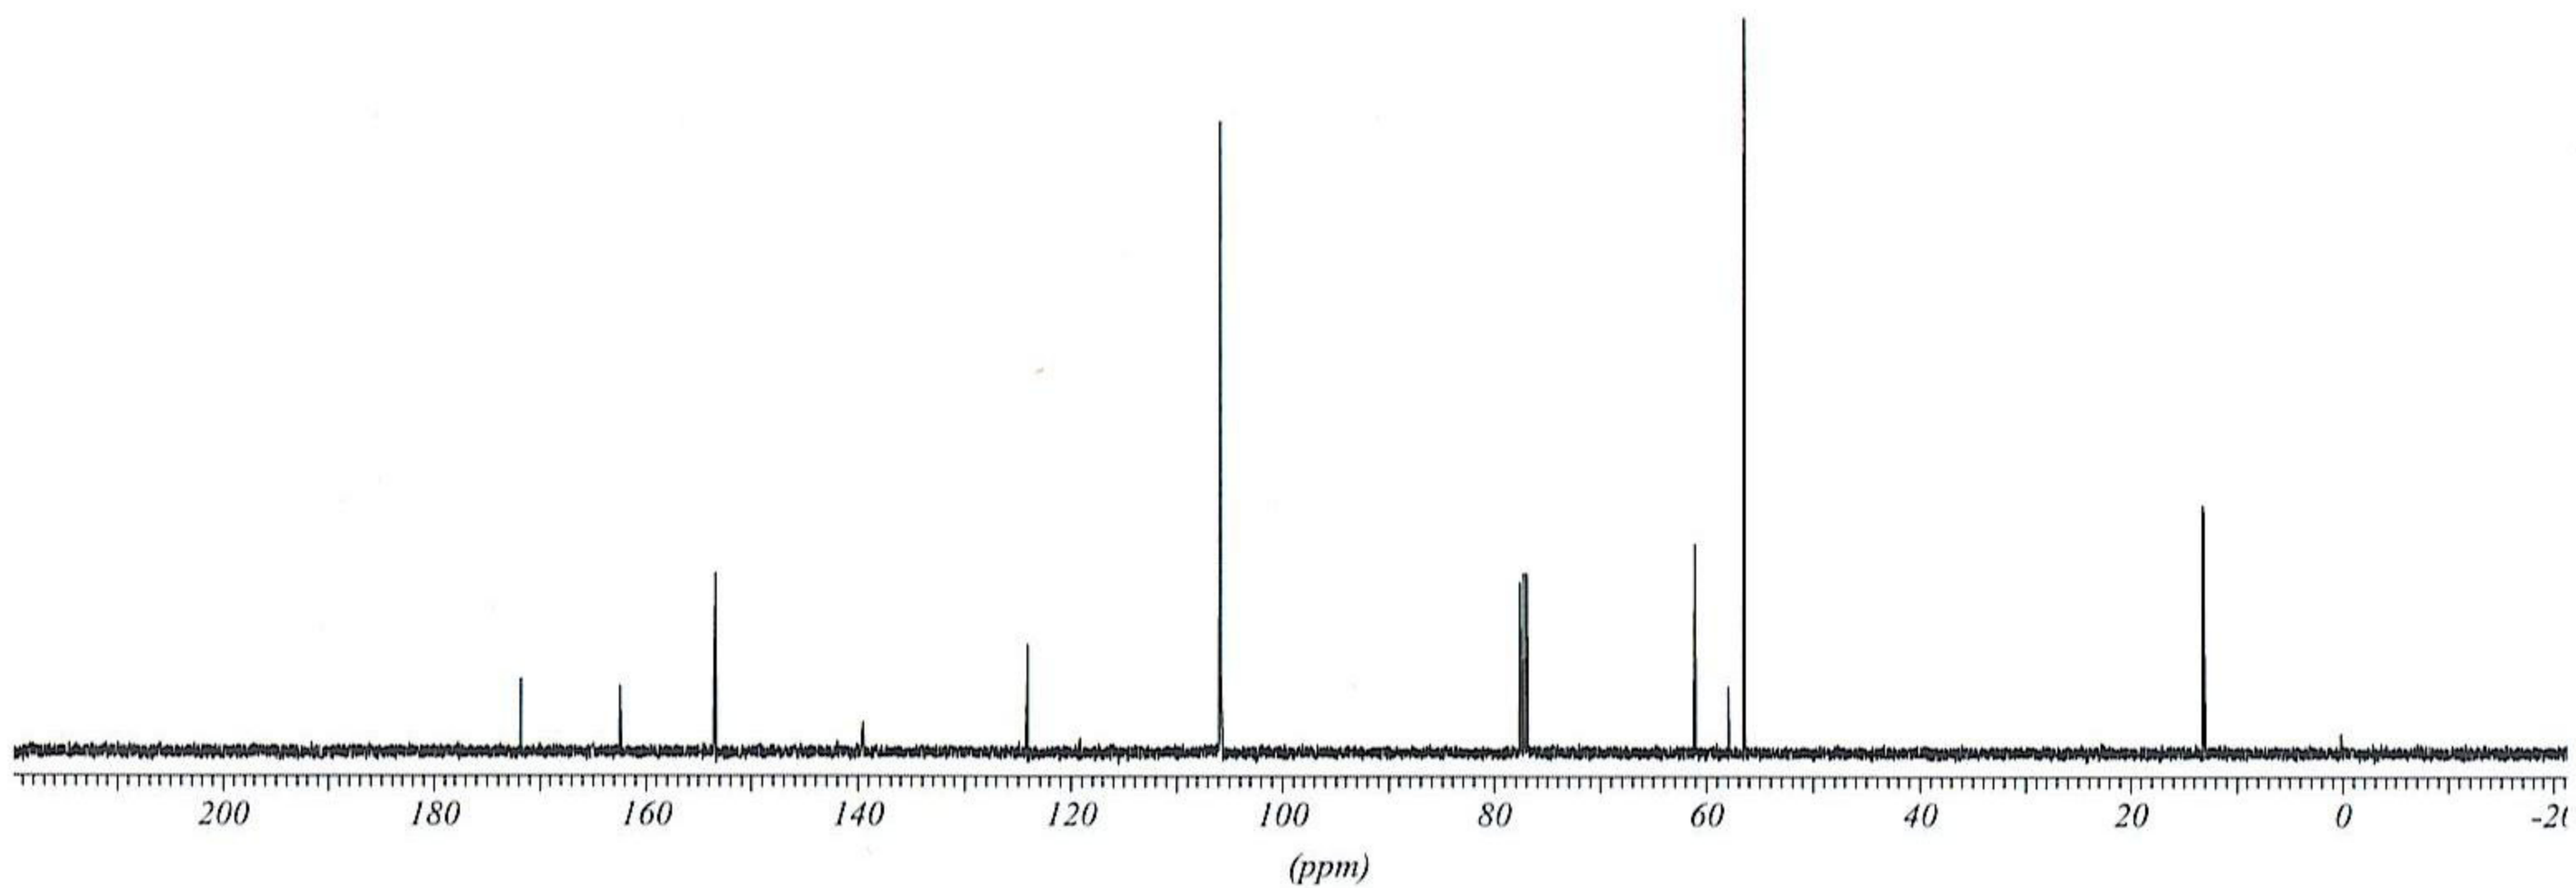

7.931  
7.927  
7.912  
7.907  
7.672  
7.667  
7.660  
7.655  
7.648  
7.536  
7.518  
7.501  
7.494  
7.490  
7.476  
7.257

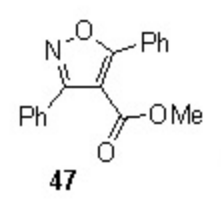

3.722

-0.000

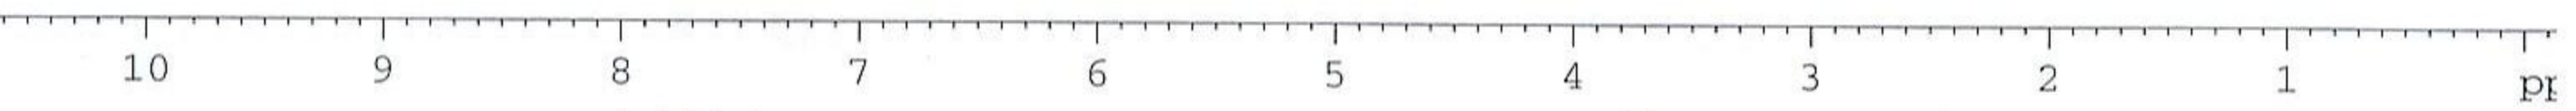

1.934  
2.000  
6.288

3.074

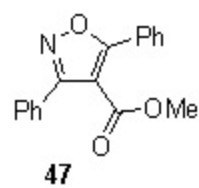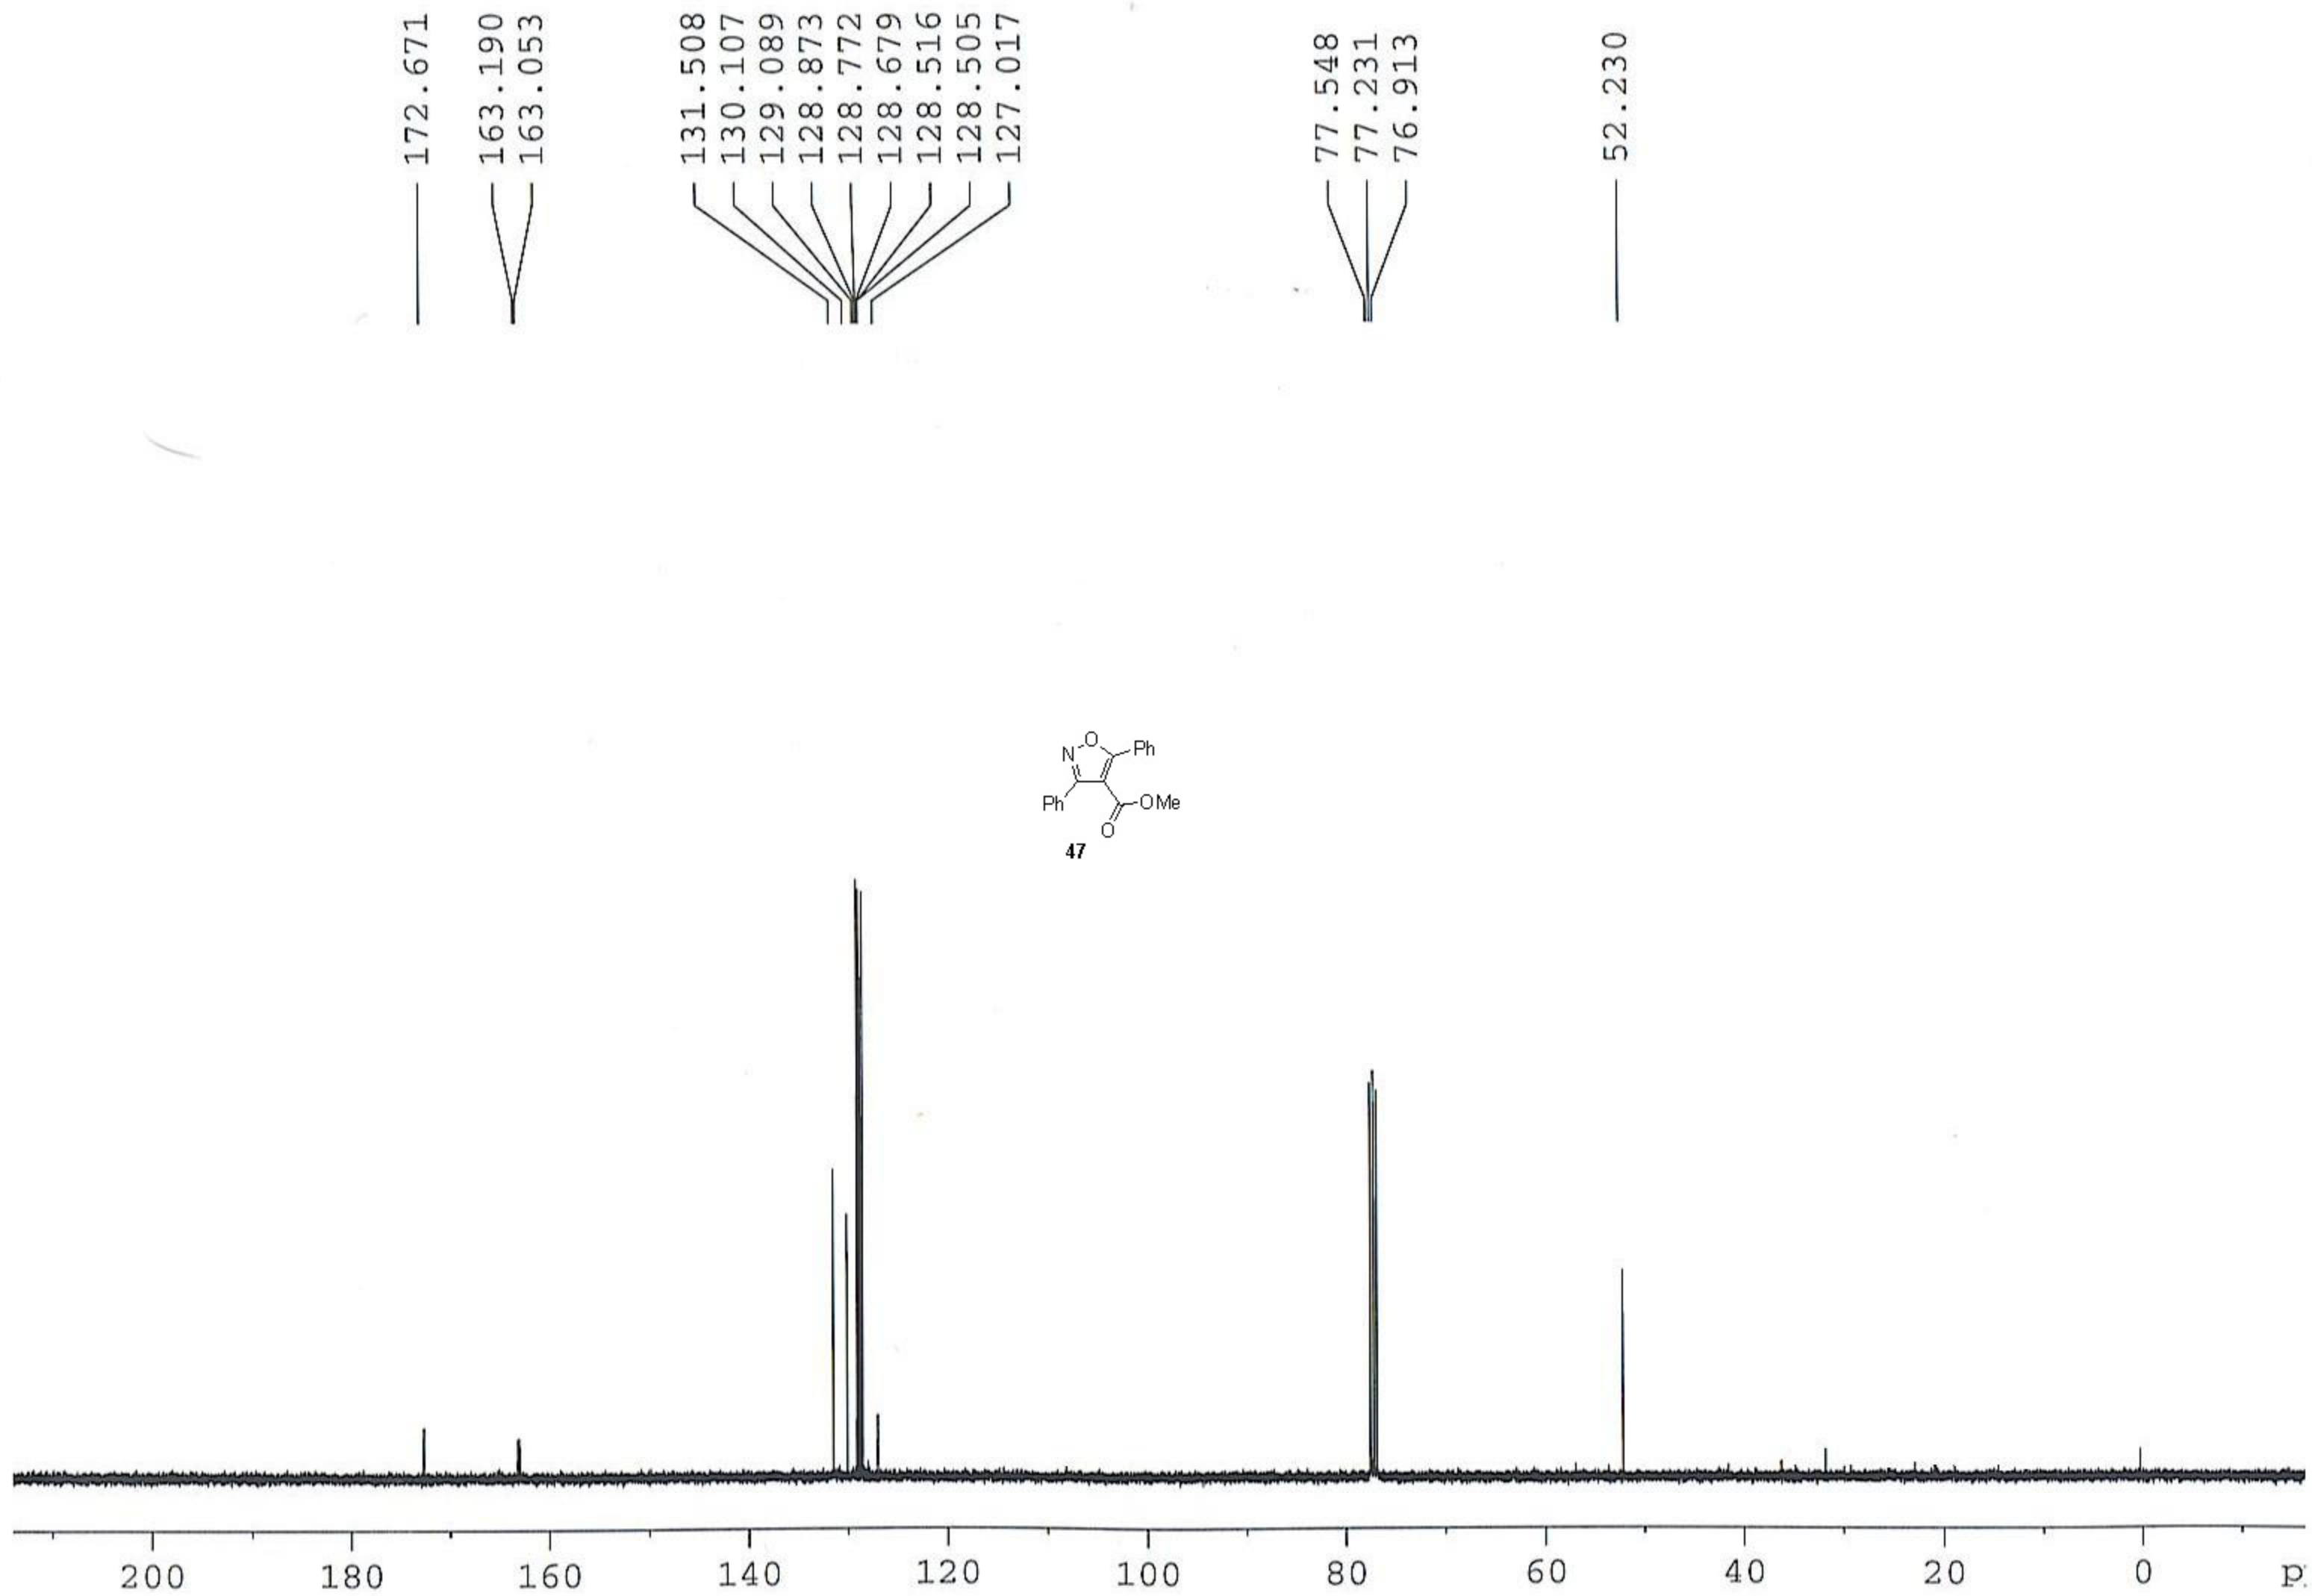

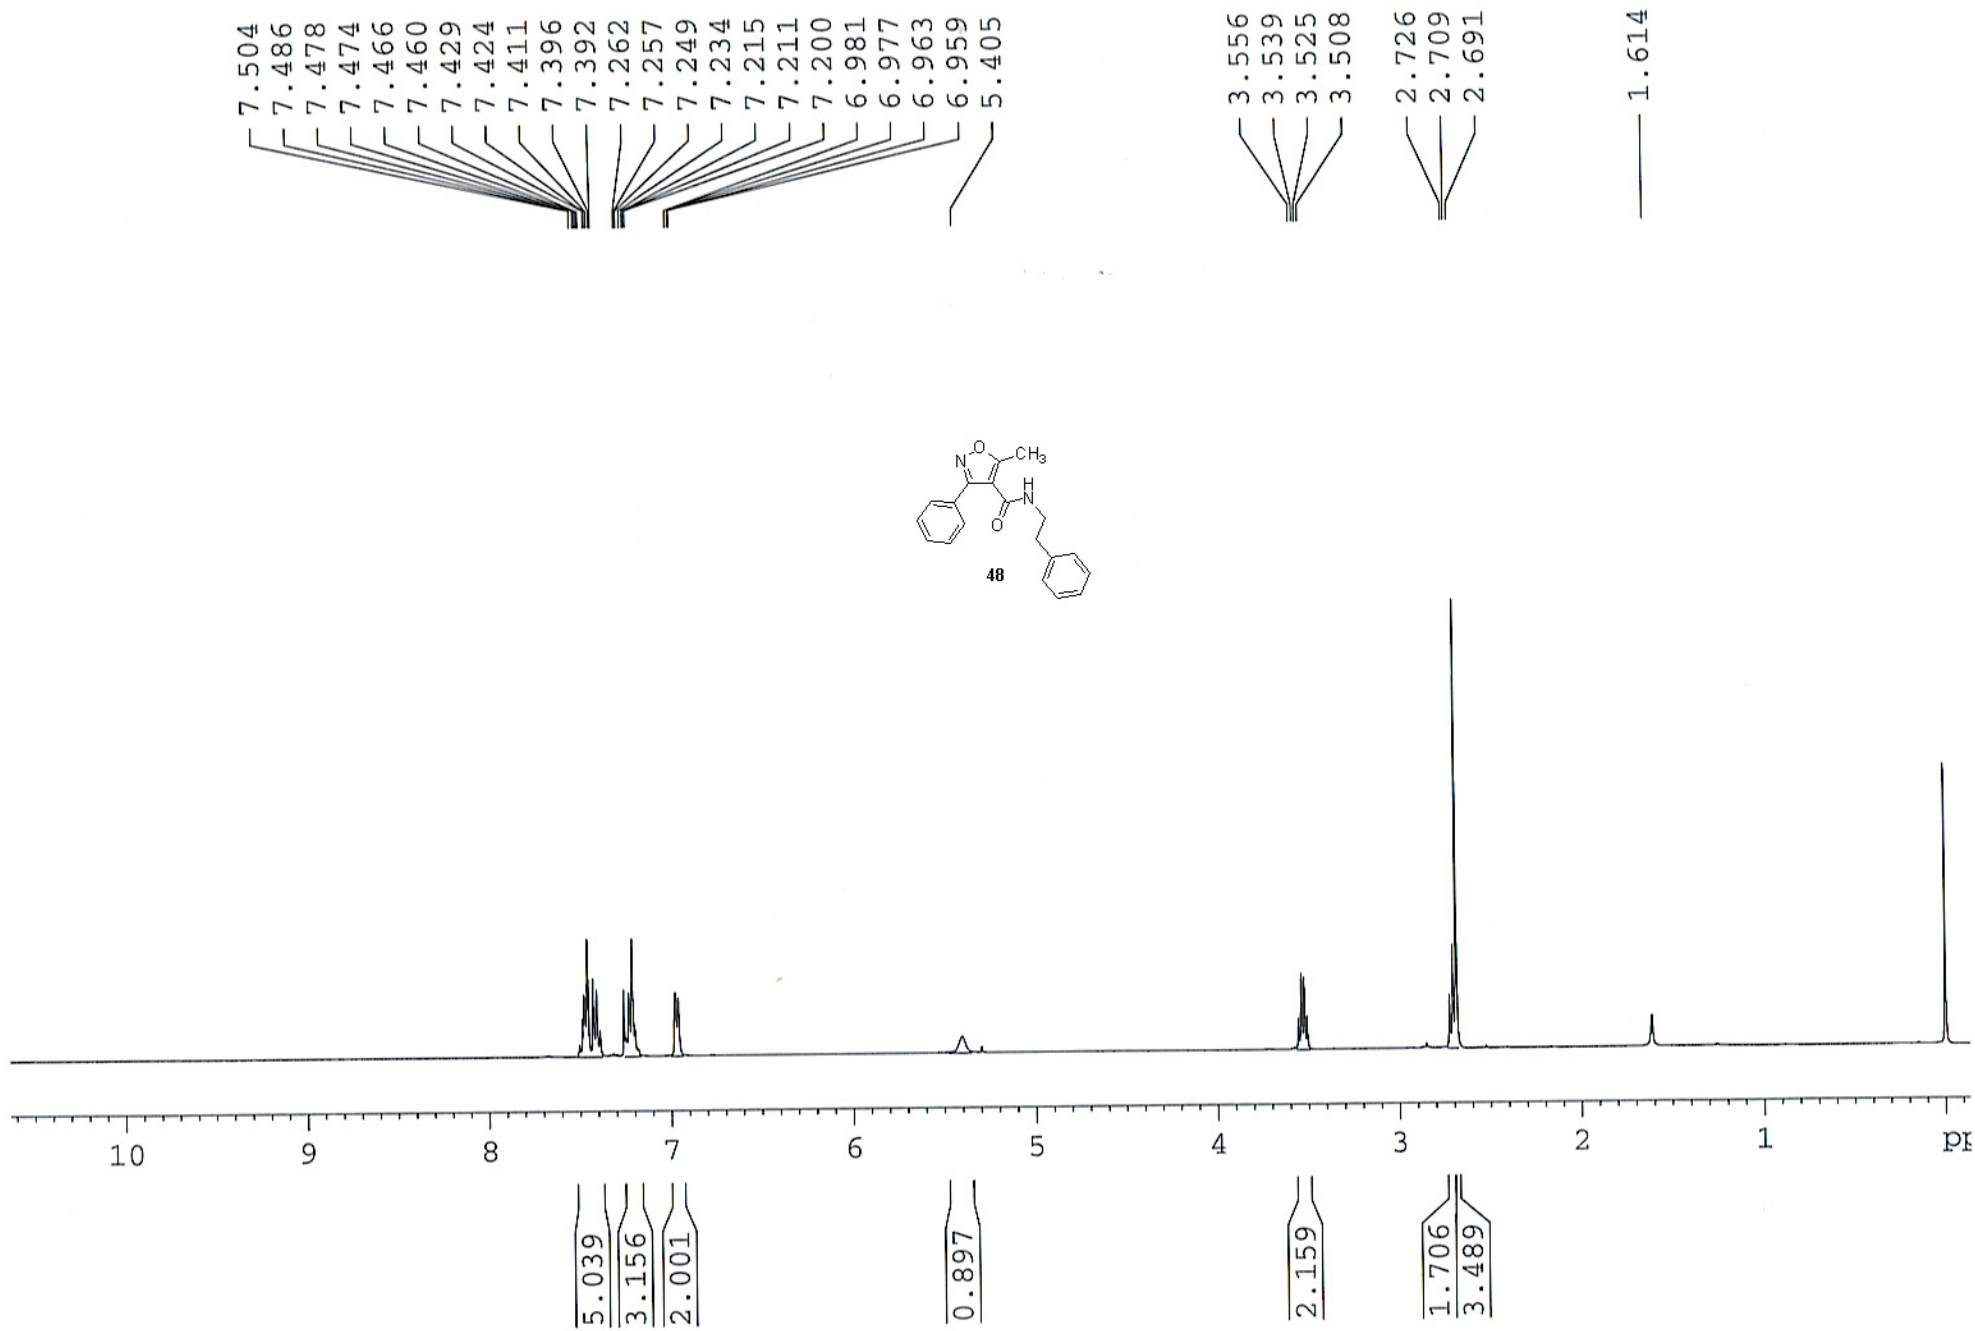



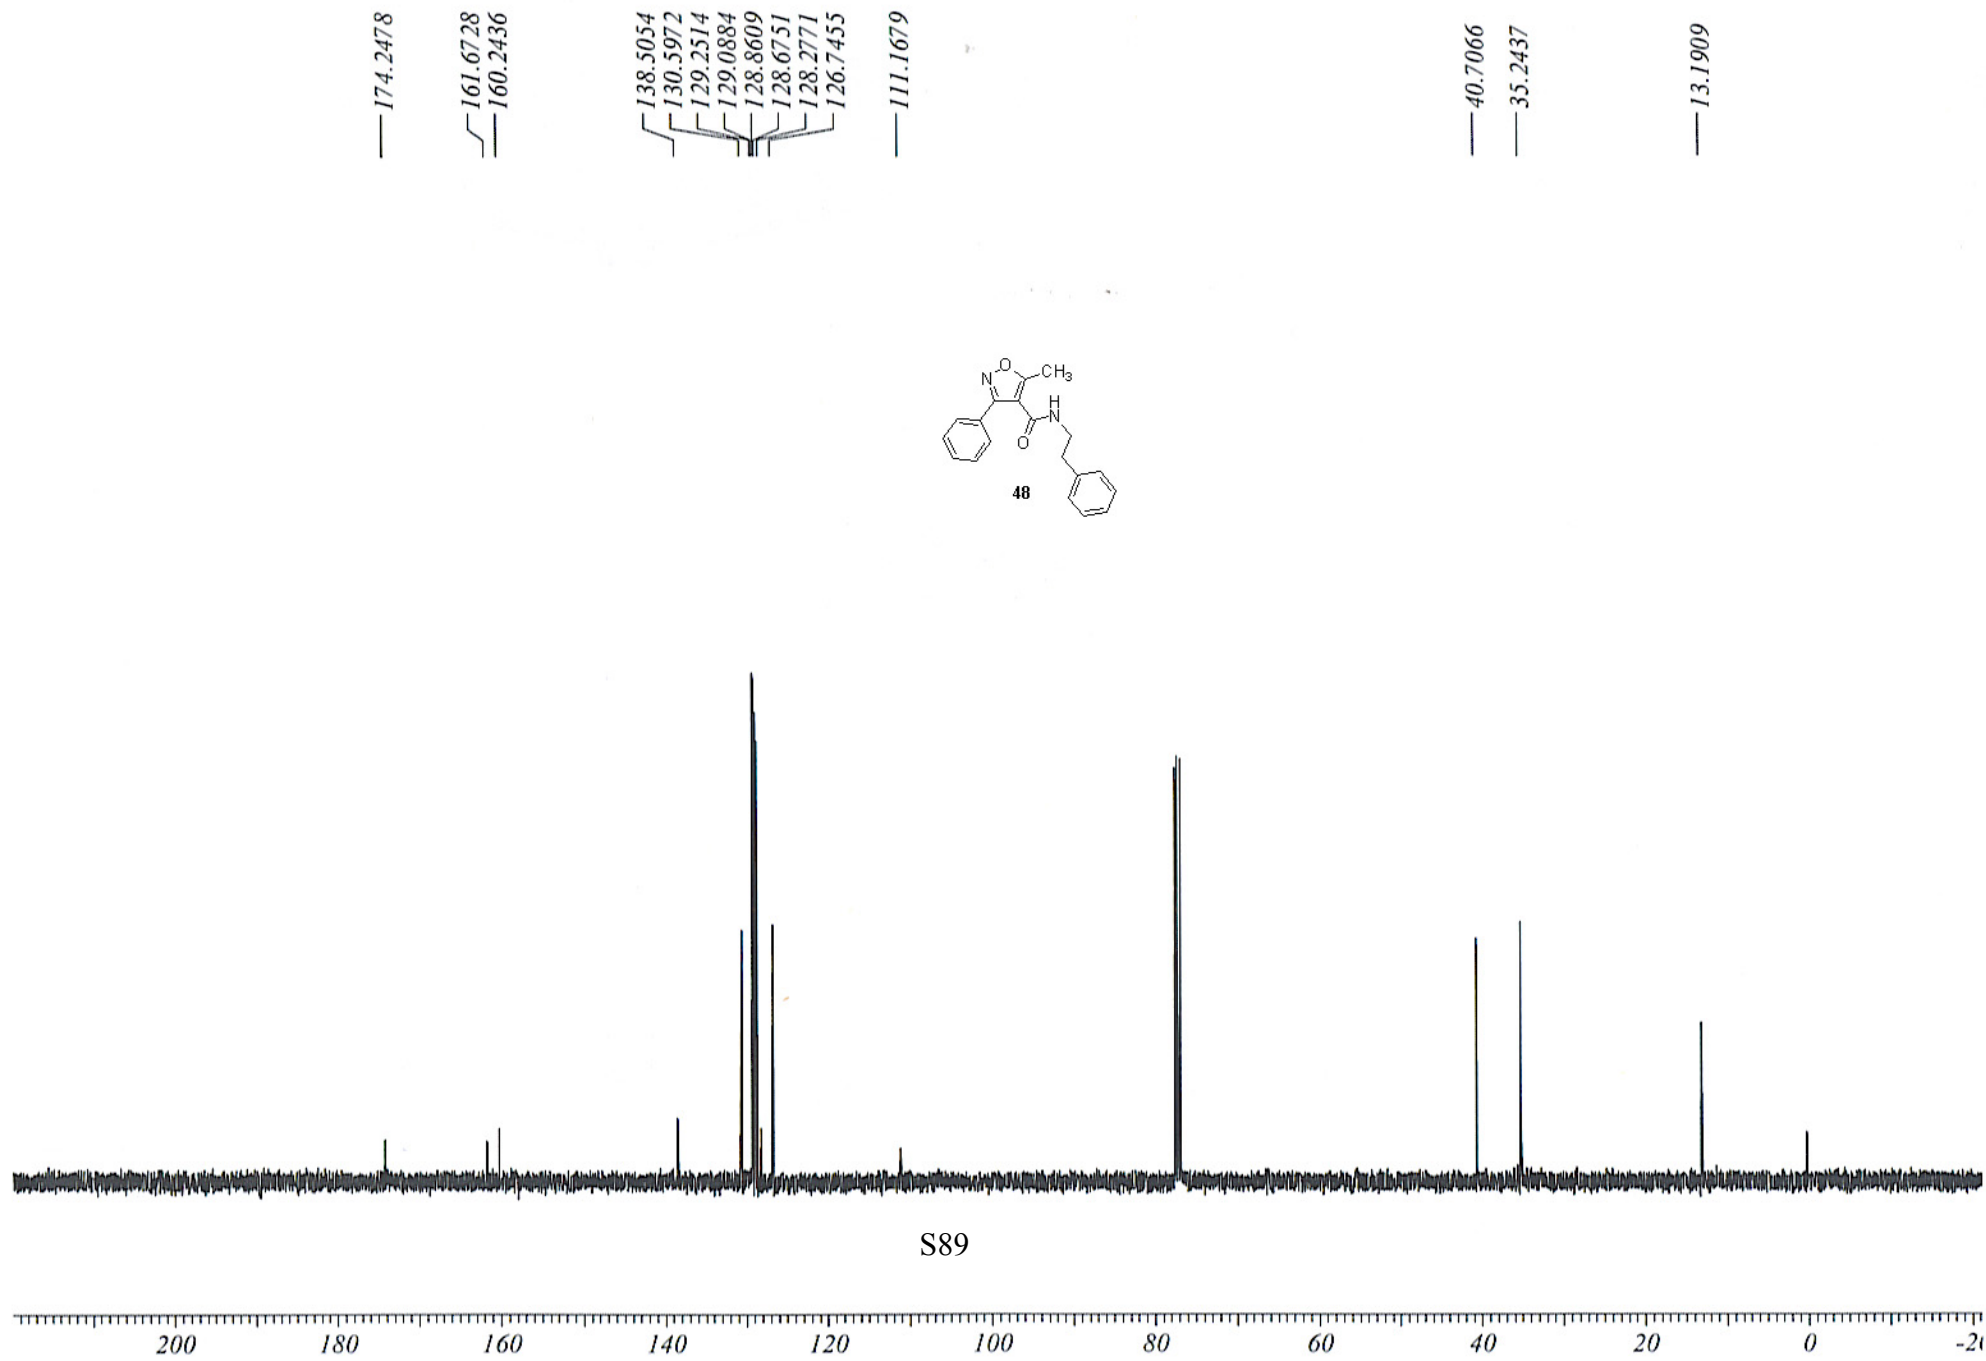

S89

8.117  
8.103  
8.092  
8.085  
7.514  
7.509  
7.507  
7.502  
7.497  
7.490  
7.481  
7.477  
7.465  
7.458  
7.358  
7.347  
7.337

2.580

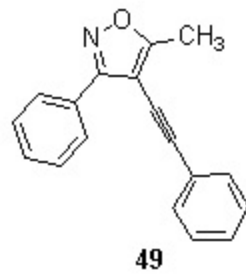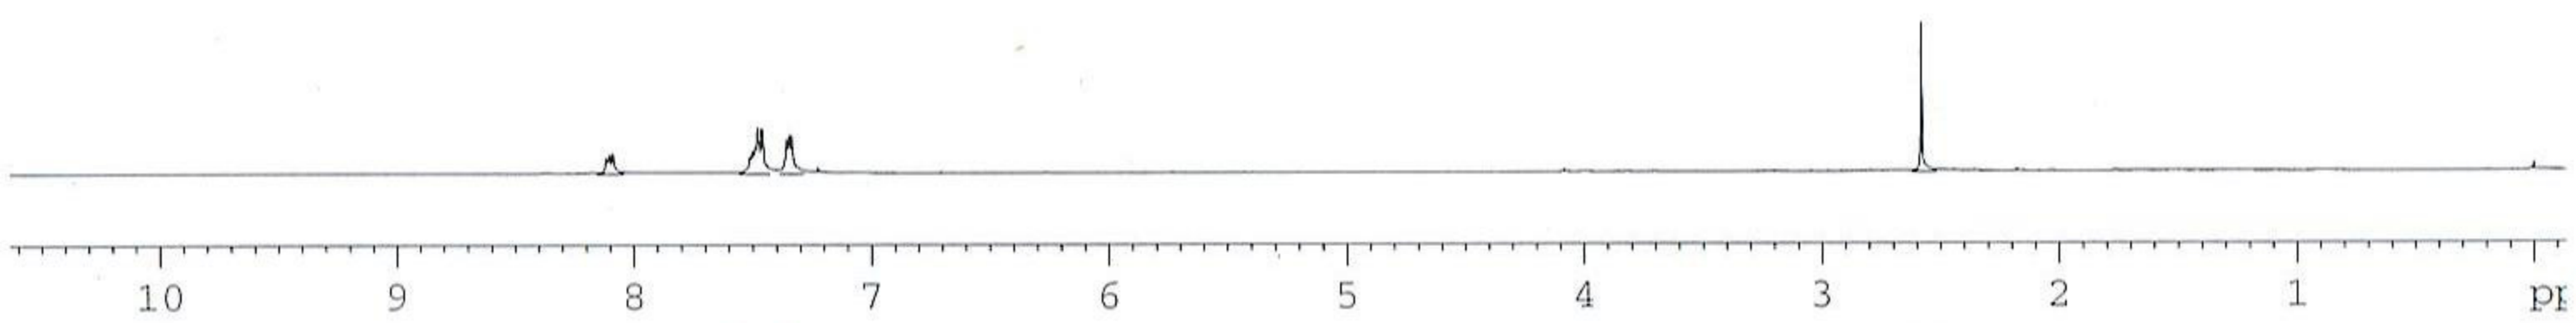

1.914

4.562  
3.000

3.119

— 173.1001

— 161.3078

— 131.5509

— 130.2866

— 128.8441

— 128.7836

— 128.6340

— 127.7151

— 122.9355

— 99.4897

— 95.0556

— 78.4302

— 77.6538

— 77.2300

— 76.8062

— 12.2921

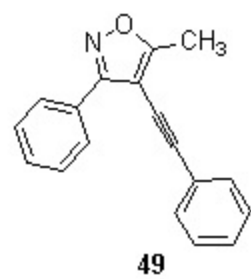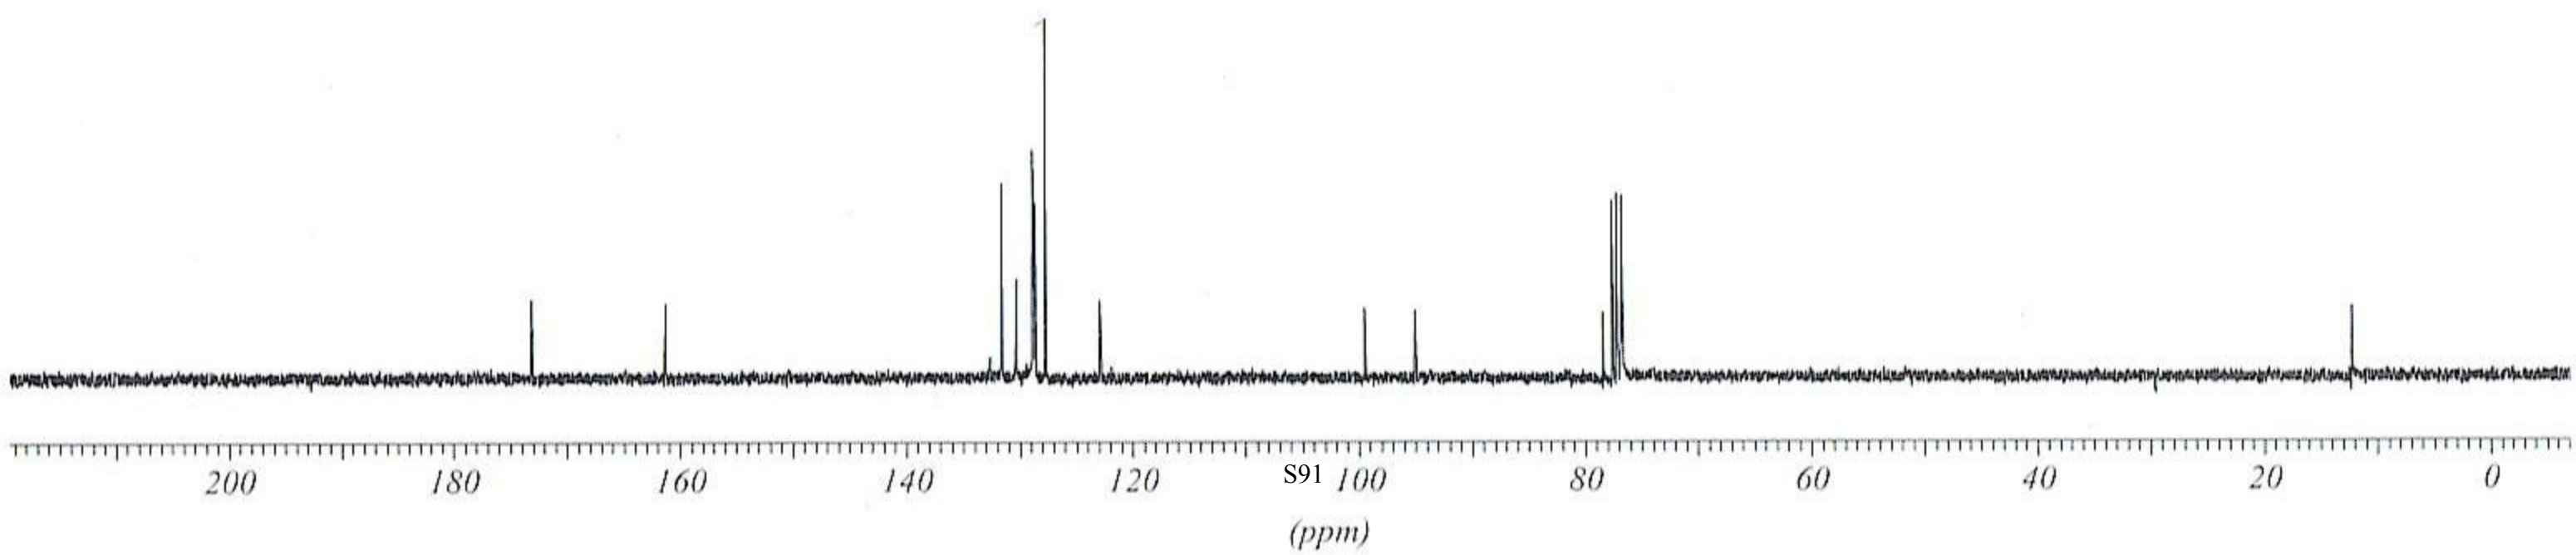

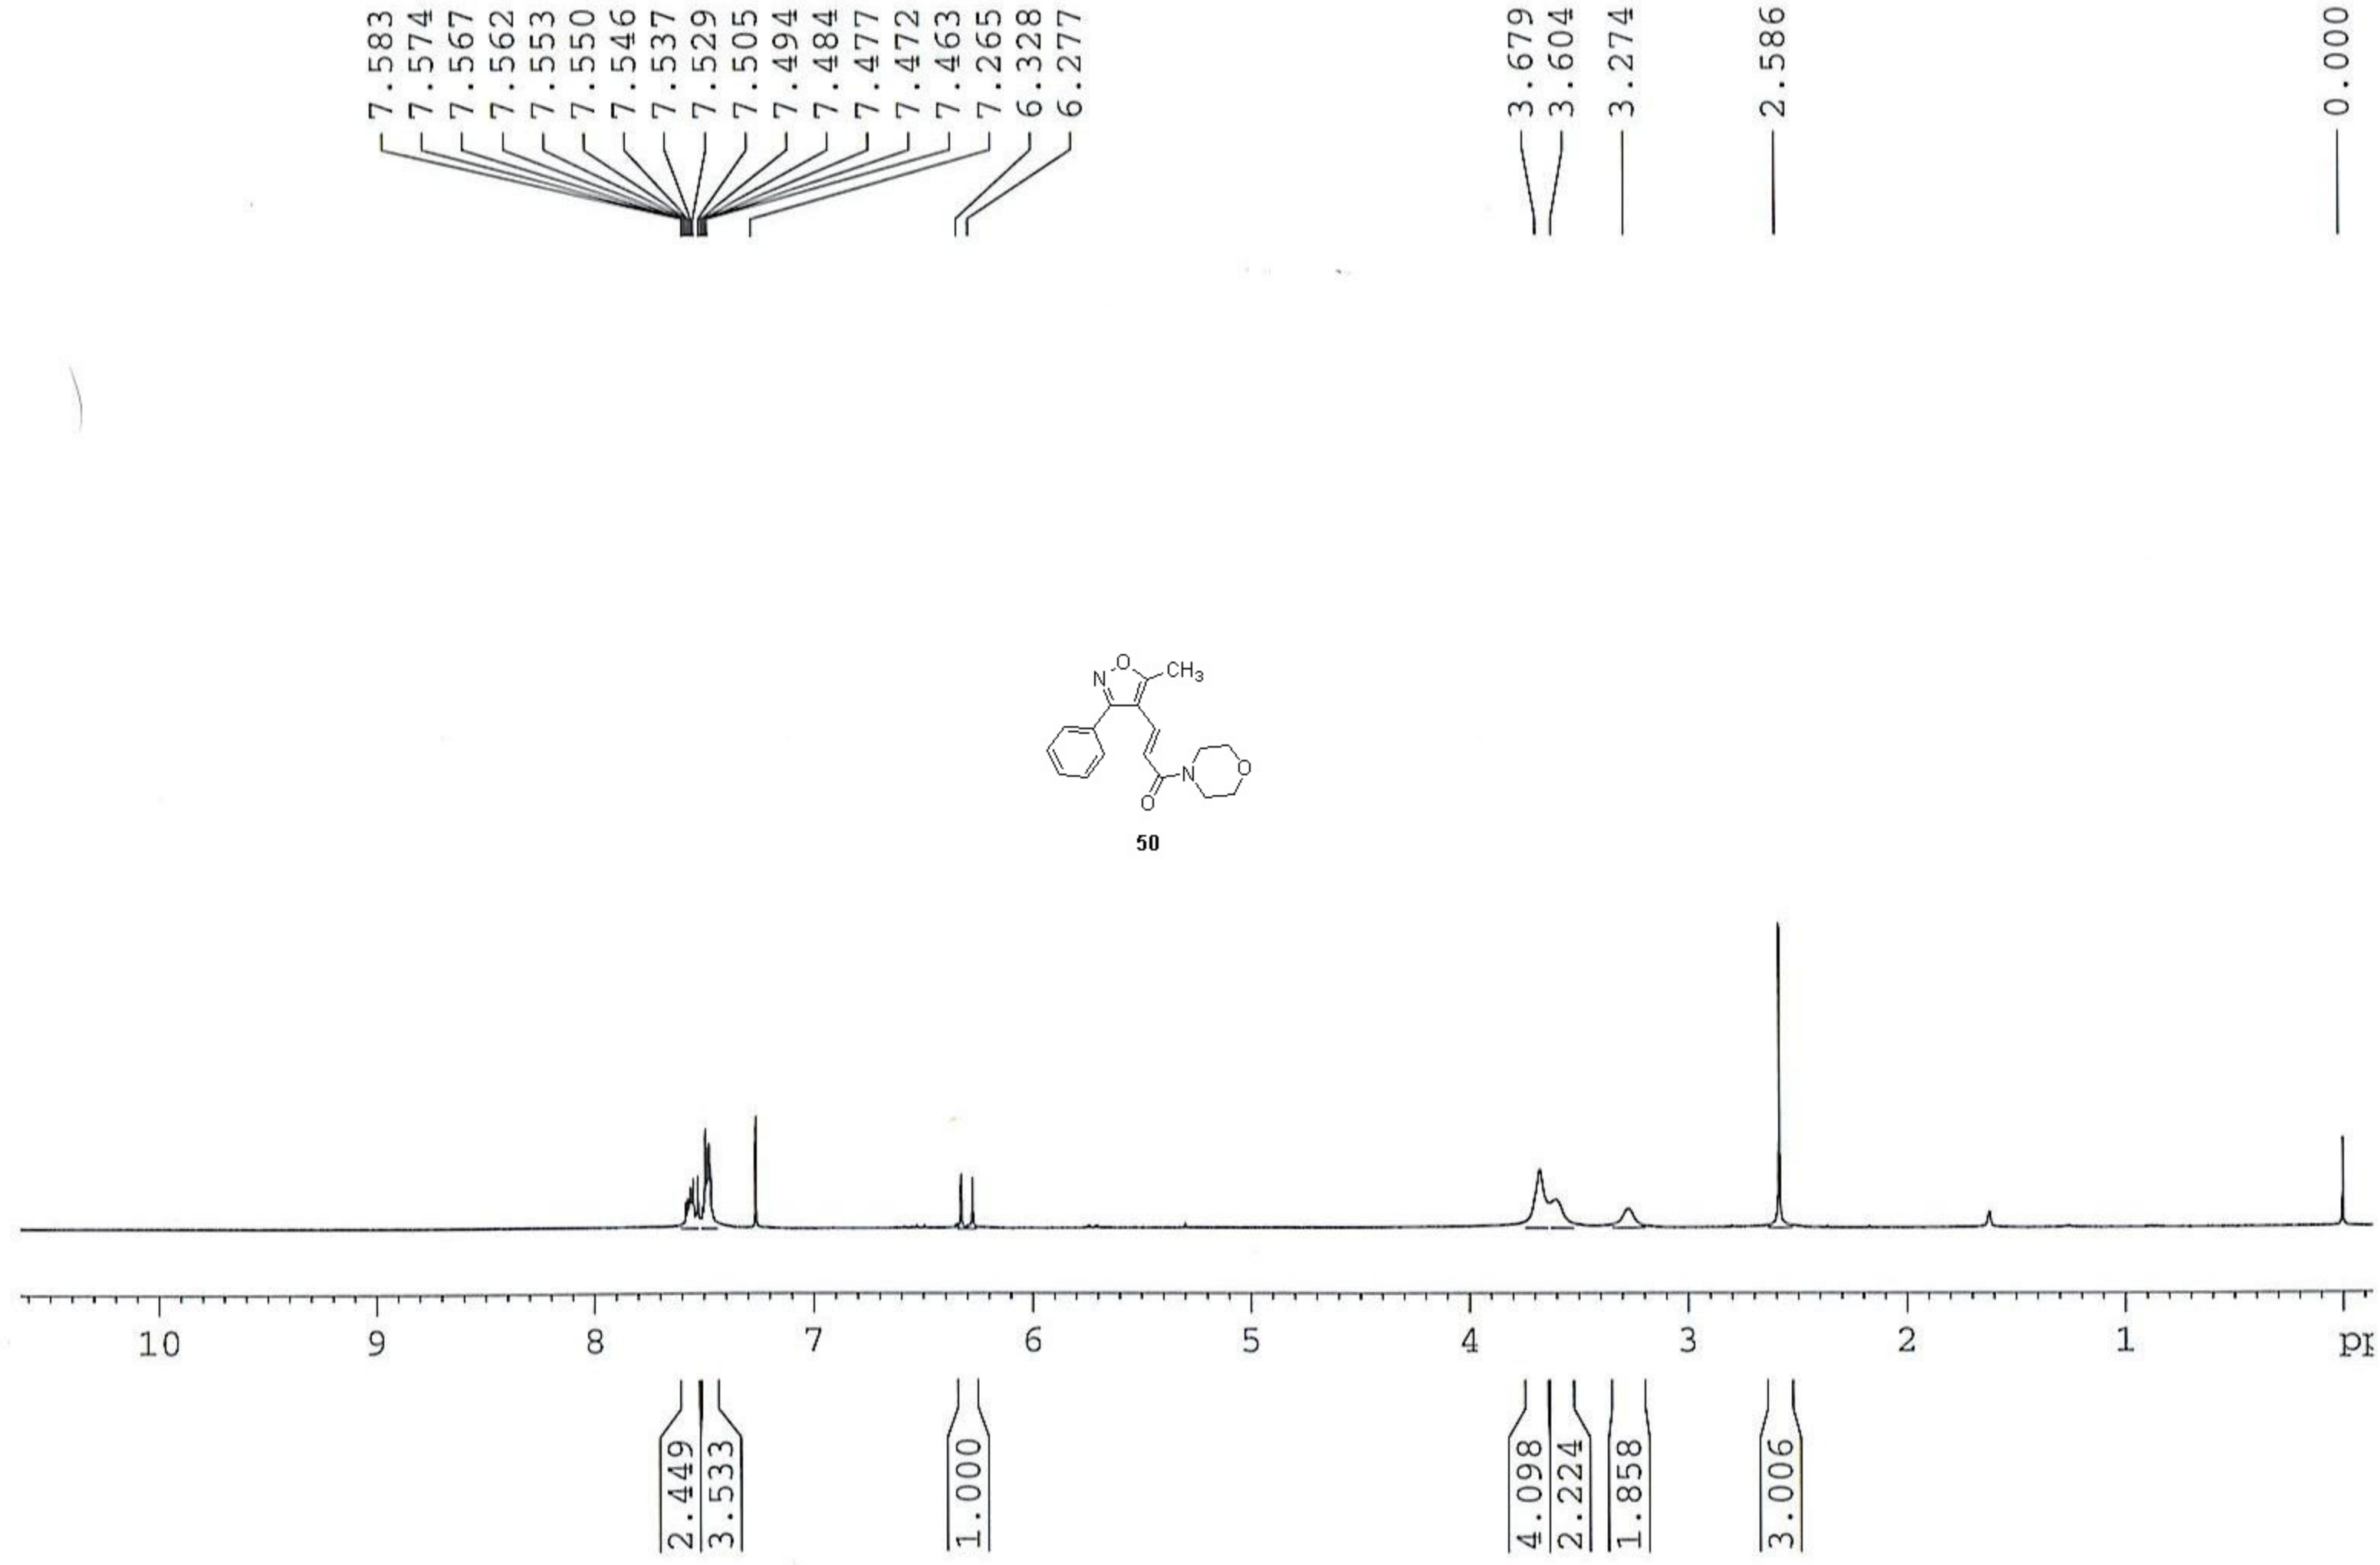

— 169.2572  
— 165.0901  
— 161.8206

— 130.8386  
— 129.9945  
— 129.2288  
— 128.9973  
— 128.9296

— 118.5049  
— 111.6632

— 66.8445

— 46.0165  
— 42.5475

— 12.3028

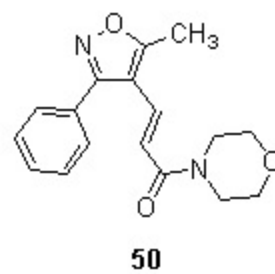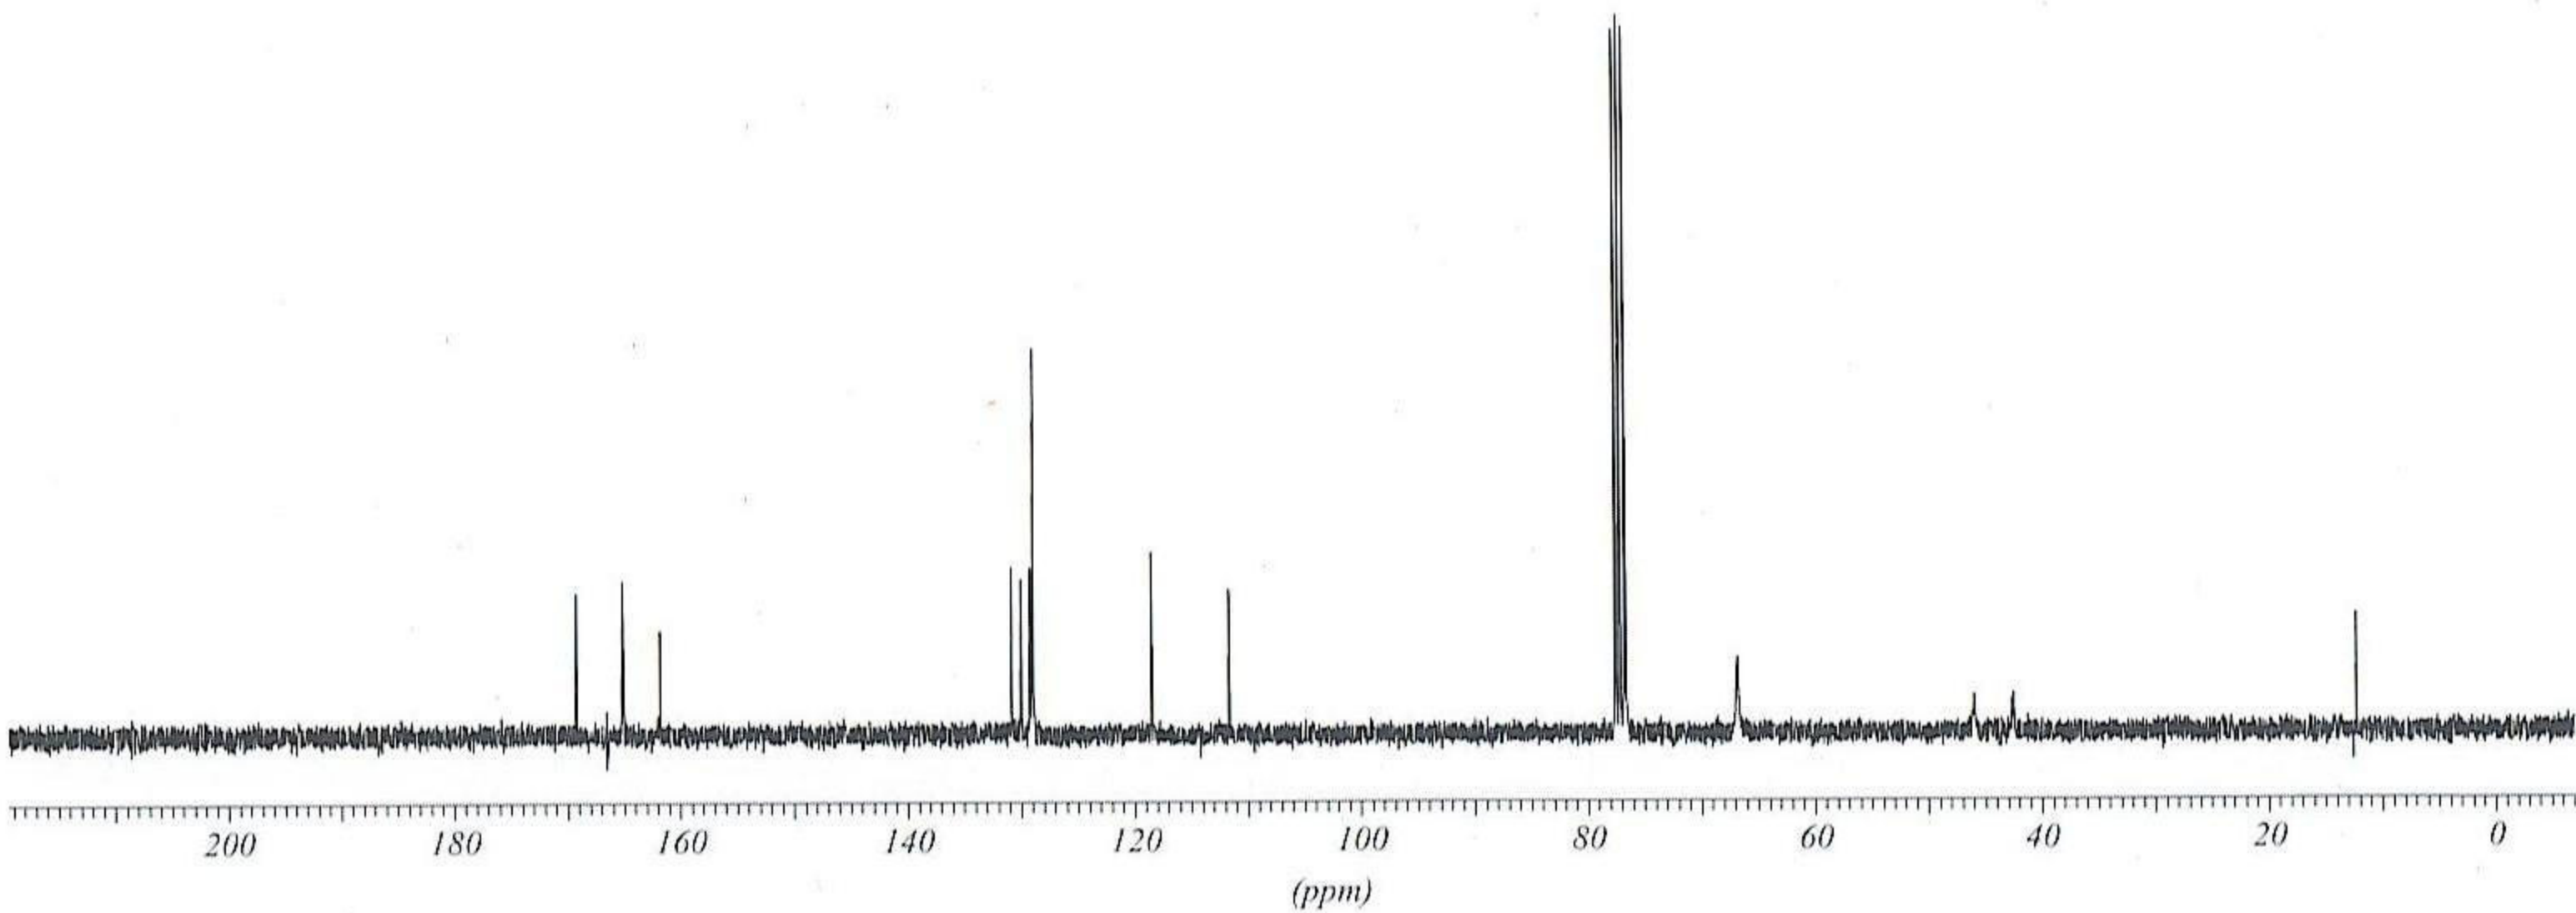

Supplement: NIHMS63550-supplement-1File003.pdf [file NIHMS63550-supplement-1File003.pdf]
